# Supplementary material
Source: PubMed Central journal article supplement (PMC6250567)

## Supporting Online Material for

# A Strategy to Aminate Pyridines, Diazines and Pharmaceuticals via Heterocyclic Phosponium Salts.

Chirag Patel, Margaret Mohnike, Michael C. Hilton and Andrew McNally\*

<sup>†</sup>Department of Chemistry, Colorado State University,  
Fort Collins, Colorado 80523, United States.

[\\*andy.mcnally@colostate.edu](mailto:andy.mcnally@colostate.edu)

### Table of Contents

|                                                                                         |            |
|-----------------------------------------------------------------------------------------|------------|
| <b>1. General Information</b>                                                           | <i>S2</i>  |
| <b>2. Optimization of Reaction Conditions</b>                                           | <i>S4</i>  |
| <b>3. Preparation of Heterocyclic Phosponium Salts</b>                                  | <i>S5</i>  |
| <b>4. Preparation of Heterocyclic Iminophosporanes</b>                                  | <i>S25</i> |
| <b>5. Derivatization Reactions</b>                                                      | <i>S45</i> |
| <b>6. Phosphine Competition Experiment</b>                                              | <i>S47</i> |
| <b>7. References</b>                                                                    | <i>S49</i> |
| <b>8. <sup>1</sup>H, <sup>13</sup>C, <sup>19</sup>F, and <sup>31</sup>P NMR Spectra</b> | <i>S50</i> |

## 1. General Information

Proton nuclear magnetic resonance ( $^1\text{H}$  NMR) spectra were recorded at ambient temperature on a Varian 400 MR spectrometer (400 MHz), an Agilent Inova 400 (400 MHz) spectrometer, an Agilent Inova 500 (500 MHz) spectrometer or a Bruker AV-111 400 (400 MHz) spectrometer. Chemical shifts ( $\delta$ ) are reported in ppm and quoted to the nearest 0.01 ppm relative to the residual protons in  $\text{CDCl}_3$  (7.26 ppm),  $\text{C}_6\text{D}_6$  (7.16 ppm),  $(\text{CD}_3)_2\text{SO}$  (2.50 ppm),  $\text{CD}_3\text{OD}$  (3.31 ppm) or  $\text{CD}_3\text{CN}$  (1.94 ppm) and coupling constants ( $J$ ) are quoted in Hertz (Hz). Data are reported as follows: Chemical shift (number of protons, multiplicity, coupling constants, proton assignment). Coupling constants were quoted to the nearest 0.1 Hz and multiplicity was reported according to the following convention: s = singlet, d = doublet, t = triplet, q = quartet, qn = quintet, sext = sextet, sp = septet, m = multiplet, br = broad. Where coincident coupling constants have been observed, the apparent (app) multiplicity of the proton resonance has been reported. Carbon nuclear magnetic resonance ( $^{13}\text{C}$  NMR) spectra were recorded at ambient temperature on Varian 400 MR spectrometer (100 MHz), an Agilent Inova 400 (100 MHz) spectrometer, an Agilent Inova 500 (125 MHz) spectrometer or a Bruker AV-111 400 (100 MHz) spectrometer. Chemical shift ( $\delta$ ) was measured in ppm and quoted to the nearest 0.1 ppm relative to the residual solvent peaks in  $\text{CDCl}_3$  (77.00 ppm),  $\text{C}_6\text{D}_6$  (128.06 ppm),  $(\text{CD}_3)_2\text{SO}$  (39.51 ppm),  $\text{CD}_3\text{OD}$  (49.00 ppm) or  $\text{CD}_3\text{CN}$  (1.32 ppm). DEPT135, NOE experiments and 2-dimensional experiments (COSY, HMBC and HSQC) were used to support assignments where appropriate.

Low-resolution mass spectra (LRMS) were measured on an Agilent 6310 Quadrupole Mass Spectrometer. Infrared (IR) spectra were recorded on a Bruker Tensor 27 FT-IR spectrometer as either solids or neat films, either through direct application or deposited in  $\text{CHCl}_3$ , with absorptions reported in wavenumbers ( $\text{cm}^{-1}$ ).

Analytical thin layer chromatography (TLC) was performed using pre-coated Merck glass-backed silica gel plates (Silicagel 60 F254) or foil-backed basic aluminum oxide plates (Baker-flex 4467). Flash column chromatography was undertaken on Fluka or Material Harvest silica gel (230–400 mesh) or Sigma-Aldrich aluminum oxide (activated, basic) under a positive pressure of air. Preparative thin layer chromatography was performed using pre-coated Silicycle glass-backed silica gel plates (Siliplate 60Å, 20 cm×20 cm, 2000  $\mu\text{m}$ , TLG–R10011B–353). Visualization was achieved using ultraviolet light (254 nm) and chemical staining with ceric ammonium molybdate or basic potassium permanganate solutions as appropriate.



Tetrahydrofuran (THF), toluene, hexane, diethyl ether and dichloromethane were dried and distilled using standard methods.<sup>1</sup> 1,2-Dichloroethane (DCE), 1,4-dioxane, chloroform, chlorobenzene and acetone were purchased anhydrous from Sigma Aldrich chemical company. All reagents were purchased at the highest commercial quality and used without further purification. Reactions were carried out under an atmosphere of nitrogen unless otherwise stated. All reactions were monitored by TLC, <sup>1</sup>H NMR spectra taken from reaction samples, gas chromatography (GC) and gas chromatography-mass spectrometry (GCMS) using an Agilent 5977A fitted with an Agilent J&W HP-5ms Ultra Inert Column (30 m, 0.25 mm, 0.25 μm film) for MS analysis and an Agilent J&W VF-5ms column (10 m, 0.15 mm, 0.15 μm film) for FID analysis or liquid chromatography mass spectrometry (LCMS) using an Agilent 6310 Quadrupole Mass Spectrometer. Melting points (mp) were recorded using a Büchi B-450 melting point apparatus and are reported uncorrected.

PPh<sub>3</sub> (99%) was purchased from Oakwood Chemical and is most effective when crushed to a powder before use. Tf<sub>2</sub>O (99%) was purchased from Oakwood Chemical and used without further purification and was routinely stored in a -20 °C fridge. NEt<sub>3</sub> and DBU were distilled before use. Deuterated solvents were purchased from Cambridge Isotope Laboratories, Inc. and were used without further purification. ACS reagent grade DMSO (≥99.9%) was purchased from Sigma Aldrich, distilled, and stored under nitrogen atmosphere in a -20 °C fridge. ReagentPlus grade sodium azide (≥99.5%) was purchased from Sigma Aldrich and used without further purification.

## 2. Optimization of Reaction Conditions

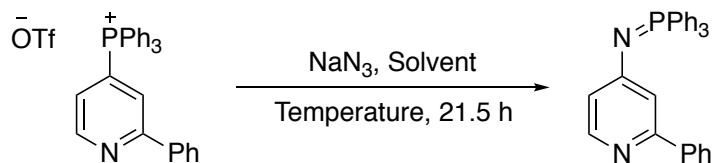

| entry     | equivalents of NaN <sub>3</sub> | Concentration (M) | solvent     | Temperature (°C) | % yield*  |
|-----------|---------------------------------|-------------------|-------------|------------------|-----------|
| 1         | 1.0                             | 1.0               | DMSO        | 100              | 39        |
| 2         | 1.0                             | 1.0               | DMSO        | 110              | 51        |
| 3         | 1.0                             | 1.0               | DMSO        | 120              | 81        |
| 4         | 1.0                             | 1.0               | DMSO        | 130              | 74        |
| 5         | 1.0                             | 1.0               | DMSO        | 140              | 79        |
| 6         | 0.8                             | 1.0               | DMSO        | 120              | 70        |
| 8         | 1.25                            | 1.0               | DMSO        | 120              | 88        |
| 9         | 1.5                             | 1.0               | DMSO        | 120              | 84        |
| 10        | 2.0                             | 1.0               | DMSO        | 120              | 85        |
| 11        | 1.25                            | 0.25              | DMSO        | 120              | 72        |
| 12        | 1.25                            | 0.5               | DMSO        | 120              | 79        |
| 13        | 1.25                            | 0.75              | DMSO        | 120              | 86        |
| <b>15</b> | <b>1.25</b>                     | <b>1.5</b>        | <b>DMSO</b> | <b>120</b>       | <b>91</b> |
| 16        | 1.25                            | 2.0               | DMSO        | 120              | 88        |
| 17        | 1.25                            | 3.0               | DMSO        | 120              | 84        |
| 18        | 1.25                            | 4.0               | DMSO        | 120              | 80        |
| 19        | 1.25                            | 5.0               | DMSO        | 120              | 77        |
| 21        | 1.25                            | 1.5               | DMF         | 120              | 66        |
| 22        | 1.25                            | 1.5               | NMP         | 120              | 68        |
| 23        | 1.25                            | 1.5               | DCE         | 80               | 0         |

\*<sup>1</sup>H NMR yields shown using 1,3,5-trimethoxybenzene as an internal standard

### 3. Preparation of Heterocyclic Phosphonium Salts

#### General Procedure A

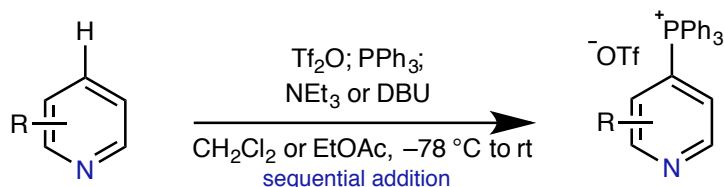

An oven dried 8 mL vial ( $\leq 0.5$  mmol scale) or a round bottom flask ( $> 0.5$  mmol scale) equipped with a stir bar was charged with the heterocycle (1.0 equiv) and placed under a nitrogen atmosphere.  $\text{CH}_2\text{Cl}_2$  (0.1 M) or  $\text{EtOAc}$  (0.4 M) was added, the reaction vessel cooled to  $-78^\circ\text{C}$ , and  $\text{Tf}_2\text{O}$  (1.0 equiv) was added dropwise over 5 minutes. The reaction was stirred for 30 minutes before  $\text{PPh}_3$  (1.1 equiv) was added in one portion. The reaction was subjected to three rapid cycles of vacuum/nitrogen backfill and was stirred for a further 30 minutes at  $-78^\circ\text{C}$ . The stated organic base ( $\text{NEt}_3$  or  $\text{DBU}$ , 1.0 equiv) was added dropwise via syringe, the cooling bath was removed and the reaction was allowed to warm to room temperature while stirring (approximately 15-30 minutes). The reaction mixture was quenched with  $\text{H}_2\text{O}$  (approximately the same volume as  $\text{CH}_2\text{Cl}_2$ ) and the mixture was transferred to a separatory funnel. The mixture was diluted with  $\text{CH}_2\text{Cl}_2$  and the resulting organic layer was washed three times with  $\text{H}_2\text{O}$ . The organic layer was dried ( $\text{MgSO}_4$ ), filtered and concentrated *in vacuo*. Approximately 2-10 mL (depending on the scale of the reaction) of  $\text{CH}_2\text{Cl}_2$  was added to reaction mixture and was then added dropwise to an excess of chilled  $\text{Et}_2\text{O}$  ( $0^\circ\text{C}$ ). The flask was then placed in a  $-20^\circ\text{C}$  refrigerator for approximately 1 h. The resulting suspension was filtered on a frit, the solid washed with chilled  $\text{Et}_2\text{O}$  ( $0^\circ\text{C}$ ), and dried *in vacuo* to provide the pure phosphonium salt.

#### Notes.

- 1)  $\text{PPh}_3$  was crushed into a powder prior to use.
- 2) Certain substrates require longer periods for the precipitation step and specific cases are indicated below.
- 3) In a small number of cases, residual  $\text{CH}_2\text{Cl}_2$  can become trapped in the phosphonium salt products. In these cases, heating the salts under vacuum ( $50$ - $100^\circ\text{C}$ ) removed the solvent.
- 4) In order to evaluate regioselectivity from the crude reaction mixtures, a duplicate reaction was

performed and aliquots taken after addition of the organic base and warming to room temperature. These aliquots were concentrated *in vacuo* and analyzed by  $^1\text{H}$  and  $^{31}\text{P}$  NMR.

**Triphenyl(5,6,7,8-tetrahydroquinolin-4-yl)phosphonium trifluoromethanesulfonate (1a)**

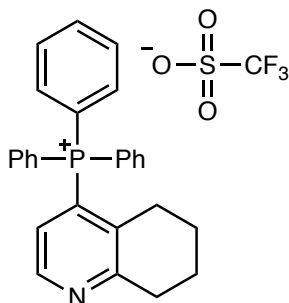

Prepared according to our previous report.<sup>2</sup>  $^1\text{H}$  NMR (400 MHz, DMSO- $d_6$ )  $\delta$ : 8.74 (1H, app t,  $J = 5.1$  Hz), 8.07-7.93 (3H, m), 7.92-7.71 (12H, m), 6.94 (1H, dd,  $J = 15.3, 5.1$  Hz), 3.12-2.97 (2H, m), 2.21-2.04 (2H, m), 1.84-1.71 (2H, m), 1.60-1.44 (2H, m);  $^{13}\text{C}$  NMR (100 MHz,  $\text{CDCl}_3$ )  $\delta$ : 160.25 (d,  $J = 8.4$  Hz), 148.20 (d,  $J = 11.4$  Hz), 135.48 (d,  $J = 7.6$  Hz), 135.27 (d,  $J = 3.1$  Hz), 134.06 (d,  $J = 10.7$  Hz), 130.50 (d,  $J = 13.0$  Hz), 126.18 (d,  $J = 9.9$  Hz), 125.51 (d,  $J = 82.4$  Hz), 120.40 (q,  $J = 322.0$  Hz), 116.34 (d,  $J = 87.7$  Hz), 32.01 (d,  $J = 2.3$  Hz), 29.66 (d,  $J = 5.3$  Hz), 21.03, 20.54. The spectroscopic data is in agreement with our reported synthesis.<sup>2</sup>

**(2-Butyl-5-(trifluoromethyl)pyridin-4-yl)triphenylphosphonium trifluoromethanesulfonate (1b)**

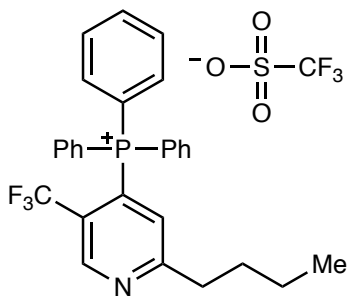

Prepared according to our previous report.<sup>2</sup>  $^1\text{H}$  NMR (400 MHz,  $\text{CDCl}_3$ ): 9.16 (1H, d,  $J = 6.8$  Hz), 7.92-7.87 (3H, m), 7.80-7.76 (6H, m), 7.73-7.67 (6H, m), 7.18 (1H, d,  $J = 17.2$  Hz), 2.93 (2H, t,  $J = 7.6$  Hz,

H<sub>6</sub>), 1.69–1.62 (2H, m), 1.37–1.27 (2H, m), 0.88 (3H, t,  $J = 7.2$  Hz); <sup>13</sup>C NMR (100 MHz, CDCl<sub>3</sub>): 169.99 (d,  $J = 9.7$  Hz), 150.06 (m), 135.96 (d,  $J = 3.1$  Hz), 134.41 (d,  $J = 10.4$  Hz), 130.74 (d,  $J = 13.0$  Hz), 129.77 (d,  $J = 8.5$  Hz), 125.90 (d,  $J = 80.1, 1.0$  Hz), 124.42 (qd,  $J = 33.1, 4.0$  Hz), 122.49 (qd,  $J = 275.1, 2.9$  Hz), 120.76 (q,  $J = 321.2$  Hz), 116.40 (d,  $J = 90.4$  Hz), 37.93, 30.35, 22.11, 13.63; <sup>19</sup>F NMR (365 MHz, CDCl<sub>3</sub>): -78.27, -53.55; <sup>31</sup>P NMR (162 MHz, CDCl<sub>3</sub>): 27.4 (d,  $J = 2.3$  Hz). The spectroscopic data is in agreement with our reported synthesis.<sup>2</sup>

**(2-(Methylthio)-5-(trifluoromethyl)pyridin-4-yl)triphenylphosphonium trifluoromethanesulfonate (1c)**

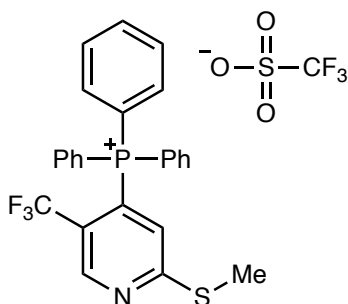

Prepared according to general procedure A using 2-(methylthio)-5-(trifluoromethyl)pyridine (850 mg, 4.40 mmol), Tf<sub>2</sub>O (0.74 mL, 4.40 mmol), PPh<sub>3</sub> (1.27 g, 4.84 mmol), DBU (0.66 mL, 4.40 mmol) and CH<sub>2</sub>Cl<sub>2</sub> (45 mL). After the purification procedure, the title compound was isolated as a white solid (1.34 g, 2.22 mmol, 51% yield). mp 183-184 °C; IR  $\nu_{\max}$ /cm<sup>-1</sup> (film): 3062, 3006, 1570, 1443, 1438, 1271, 1262, 1155, 1140, 1128, 1109, 1029, 720; <sup>1</sup>H NMR (400 MHz, CDCl<sub>3</sub>)  $\delta$ : 8.99 (1H, d,  $J = 6.8$  Hz), 7.94-7.85 (3H, m), 7.83-7.74 (6H, m), 7.72-7.62 (6H, m), 7.00 (1H, d,  $J = 17.1$  Hz), 2.56 (3H, s); <sup>13</sup>C NMR (100 MHz, CDCl<sub>3</sub>)  $\delta$ : 169.71 (d,  $J = 10.3$  Hz), 150.40-150.08 (m), 136.09 (d,  $J = 3.1$  Hz), 134.45 (d,  $J = 10.6$  Hz), 130.83 (d,  $J = 13.4$  Hz), 128.61 (d,  $J = 9.5$  Hz), 125.29 (d,  $J = 79.0$  Hz), 122.74 (qd,  $J = 274.4, 2.1$  Hz), 121.14 (qd,  $J = 33.7, 4.0$  Hz), 120.85 (q,  $J = 321.2$  Hz), 116.28 (d,  $J = 89.9$  Hz), 13.64; <sup>19</sup>F NMR (365 MHz, CDCl<sub>3</sub>)  $\delta$ : -53.37, -78.18; <sup>31</sup>P NMR (162 MHz, CDCl<sub>3</sub>)  $\delta$ : 27.57;  $m/z$  LRMS (ESI + APCI) found [M - OTf]<sup>+</sup> 454.2, C<sub>25</sub>H<sub>20</sub>F<sub>3</sub>NPS<sup>+</sup> requires 454.1.

**(5-Cyano-2-(4-methoxyphenoxy)pyridin-4-yl)triphenylphosphonium (1d)**

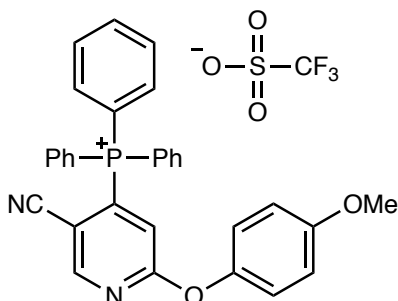

Prepared according to general procedure A using 6-(4-methoxyphenoxy)nicotinonitrile (1.23 g, 5.44 mmol), Tf<sub>2</sub>O (0.91 mL, 5.44 mmol), PPh<sub>3</sub> (1.57 g, 5.98 mmol), DBU (0.81 mL, 5.44 mmol) and CH<sub>2</sub>Cl<sub>2</sub> (60 mL). After the purification procedure, the title compound was isolated as a yellow solid (1.28 g, 2.01 mmol, 45% yield). mp 112-114 °C; IR  $\nu_{\max}$ /cm<sup>-1</sup> (film): 3061, 2989, 2226, 1575, 1502, 1467, 1438, 1357, 1261, 1236, 1223, 1147, 1106, 1029; <sup>1</sup>H NMR (400 MHz, CDCl<sub>3</sub>)  $\delta$ : 8.63 (1H, d, *J* = 6.0 Hz), 7.96-7.71 (15H, m), 7.15 (2H, d, *J* = 8.9 Hz), 6.98 (1H, d, *J* = 16.0 Hz), 6.87 (2H, d, *J* = 8.9 Hz), 3.76 (3H, s); <sup>13</sup>C NMR (100 MHz, CDCl<sub>3</sub>)  $\delta$ : 166.57 (d, *J* = 14.6 Hz), 157.51, 155.51 (d, *J* = 7.5 Hz), 145.30, 136.30 (d, *J* = 3.1 Hz), 134.75 (d, *J* = 10.8 Hz), 133.60 (d, *J* = 83.8 Hz), 131.00 (d, *J* = 13.4 Hz), 122.41, 120.76 (q, *J* = 321.3 Hz), 120.74 (d, *J* = 9.5 Hz), 114.77, 114.46 (d, *J* = 90.0 Hz), 114.06 (d, *J* = 4.5 Hz), 104.60 (d, *J* = 4.2 Hz), 55.49; <sup>19</sup>F NMR (365 MHz, CDCl<sub>3</sub>)  $\delta$ : -78.10; <sup>31</sup>P NMR (162 MHz, CDCl<sub>3</sub>)  $\delta$ : 22.91; *m/z* LRMS (ESI + APCI) found [M - OTf]<sup>+</sup> 487.3, C<sub>31</sub>H<sub>24</sub>N<sub>2</sub>O<sub>2</sub>P<sup>+</sup> requires 487.2.

**(3-Cyano-5-(3-fluorophenyl)pyridin-4-yl)triphenylphosphonium trifluoromethanesulfonate (1e)**

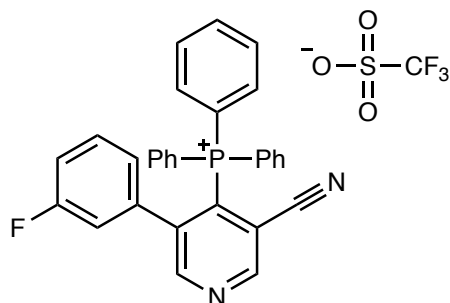

Prepared according to our previous report.<sup>3</sup> <sup>1</sup>H NMR (400 MHz, CDCl<sub>3</sub>)  $\delta$ : 9.10 (1H, dd,  $J = 4.9, 1.2$  Hz), 8.83 (1H, dd,  $J = 5.5, 1.1$  Hz), 7.92-7.44 (15H, m), 7.02-6.92 (1H, m), 6.84-6.73 (2H, m), 6.70 (1H, d,  $J = 8.9$  Hz); <sup>13</sup>C NMR (100 MHz, CDCl<sub>3</sub>)  $\delta$ : 162.59 (d,  $J = 247.8$  Hz), 152.82, 147.29, 140.07, 137.63 (d,  $J = 7.9$  Hz), 135.63, 130.31 (d,  $J = 8.4$  Hz), 128.95, 128.72, 127.93, 125.41 (d,  $J = 3.1$  Hz), 116.68 (d,  $J = 22.5$  Hz), 115.98 (d,  $J = 21.0$  Hz), 115.08. The spectroscopic data is in agreement with our reported synthesis.<sup>3</sup>

**(3-Cyano-5-(thiophen-3-yl)pyridin-4-yl)triphenylphosphonium trifluoromethanesulfonate (1f)**

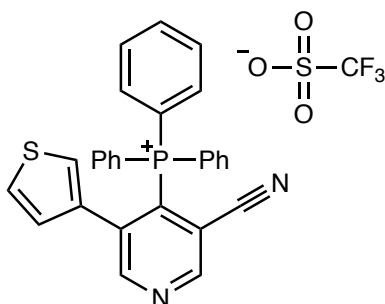

Major

11.4:1 Mixture of Regioisomers

Prepared according to general procedure A using 5-(thiophen-3-yl)nicotinonitrile (1.86 g, 10.00 mmol), Tf<sub>2</sub>O (1.68 mL, 10.00 mmol), PPh<sub>3</sub> (2.88 g, 11.00 mmol), DBU (1.49 mL, 10.00 mmol) and CH<sub>2</sub>Cl<sub>2</sub> (100 mL). After the purification procedure, the title compound (11.4:1 mixture of regioisomers as determined

by  $^1\text{H}$  NMR)\* was isolated as a white solid (3.73 g, 6.25 mmol, 63% yield). Mixture of isomers, IR  $\nu_{\text{max}}/\text{cm}^{-1}$  (film): 3066, 2227, 1586, 1441, 1261, 1223, 1149, 1102, 1079, 1030, 996, 720; Major isomer,  $^1\text{H}$  NMR (400 MHz, DMSO- $d_6$ )  $\delta$ : 9.45 (1H, d,  $J = 5.0$  Hz), 9.07 (1H, d,  $J = 5.5$  Hz), 7.98-7.84 (9H, m), 7.77-7.67 (6H, m), 7.21-7.16 (1H, m), 7.13 (1H, br s), 6.57 (1H, d,  $J = 4.9$  Hz); Major isomer,  $^{13}\text{C}$  NMR<sup>†</sup> (100 MHz, DMSO- $d_6$ )  $\delta$ : 157.02 (d,  $J = 6.9$  Hz), 154.74 (d,  $J = 5.8$  Hz), 140.22 (d,  $J = 5.5$  Hz), 135.30 (d,  $J = 3.0$  Hz), 134.48 (d,  $J = 10.8$  Hz), 130.35 (d,  $J = 13.3$  Hz), 128.47, 128.33 (d,  $J = 84.5$  Hz), 128.27, 127.78, 120.69 (q,  $J = 322.4$  Hz), 117.00 (d,  $J = 88.5$  Hz), 113.91 (d,  $J = 6.0$  Hz), 113.21 (d,  $J = 4.4$  Hz); Both isomers,  $^{19}\text{F}$  NMR (365 MHz, DMSO- $d_6$ )  $\delta$ : -77.67; Major isomer,  $^{31}\text{P}$  NMR (162 MHz, DMSO- $d_6$ )  $\delta$ : 20.26; Minor isomer,  $^{31}\text{P}$  NMR (162 MHz, DMSO- $d_6$ )  $\delta$ : 19.73;  $m/z$  LRMS (ESI + APCI) found  $[\text{M} - \text{OTf}]^+$  447.3,  $\text{C}_{28}\text{H}_{20}\text{N}_2\text{PS}^+$  requires 447.1.

### Triphenyl(4-(trifluoromethyl)pyridin-2-yl)phosphonium trifluoromethanesulfonate (1g)

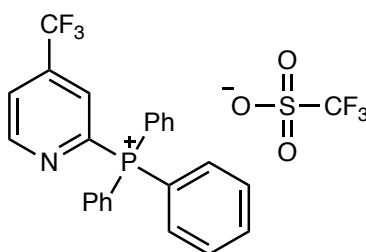

Prepared according to our previous report.<sup>2</sup>  $^1\text{H}$  NMR (400 MHz,  $\text{CDCl}_3$ )  $\delta$ : 9.33 (1H, d,  $J = 2.8$  Hz), 8.02 (1H, m), 7.92 (3H, m), 7.82–7.69 (13H, m);  $^{13}\text{C}$  NMR (100 MHz,  $\text{CDCl}_3$ )  $\delta$ : 154.20 (d,  $J = 19.9$  Hz), 147.00 (d,  $J = 121.0$  Hz), 139.92 (qd,  $J = 35.8$  Hz, 11.3 Hz), 136.02 (d,  $J = 2.9$  Hz), 134.55 (d,  $J = 10.2$  Hz), 130.70 (d,  $J = 13.1$  Hz), 126.05 (dq,  $J = 25.9$ , 3.6 Hz), 124.36 (m), 121.47 (qd,  $J = 274.1$ , 3.0 Hz), 120.70 (q,  $J = 320.5$  Hz), 115.93 (d,  $J = 90.0$  Hz). The spectroscopic data is in agreement with our reported synthesis.<sup>2</sup>

\* In a separate reaction, the reaction mixture was concentrated *in vacuo* and the crude regiomer ratio was 7.4:1.4:1 determined by analysis of the crude  $^1\text{H}$  NMR spectrum.

<sup>†</sup> 1  $^{13}\text{C}$  resonance cannot be clearly identified from the mixture.



### (4-Methylquinolin-2-yl)triphenylphosphonium trifluoromethanesulfonate (1h)

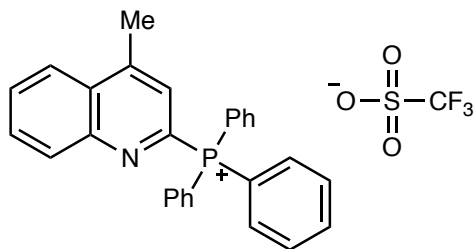

Prepared according to general procedure A (except that the reaction was warmed to  $-50\text{ }^{\circ}\text{C}$  before the addition of  $\text{PPh}_3$  and was stirred at  $-50\text{ }^{\circ}\text{C}$  for 30 minutes) using 4-methylquinoline ( $793\text{ }\mu\text{L}$ ,  $6.00\text{ mmol}$ ),  $\text{Tf}_2\text{O}$  ( $1.01\text{ mL}$ ,  $6.00\text{ mmol}$ ),  $\text{PPh}_3$  ( $1.73\text{ g}$ ,  $6.60\text{ mmol}$ ), DBU ( $0.90\text{ mL}$ ,  $6.00\text{ mmol}$ ) and  $\text{CH}_2\text{Cl}_2$  ( $60\text{ mL}$ ). After the purification procedure, the title compound was isolated as a white solid ( $2.18\text{ g}$ ,  $3.94\text{ mmol}$ ,  $66\%$  yield). mp  $171\text{--}174\text{ }^{\circ}\text{C}$ ; IR  $\nu_{\text{max}}/\text{cm}^{-1}$  (film):  $3067, 2989, 1576, 1439, 1259, 1223, 1144, 1109, 1028, 997, 765, 725$ ;  $^1\text{H NMR}$  ( $400\text{ MHz}$ ,  $\text{CDCl}_3$ )  $\delta$ :  $8.22\text{--}8.12$  ( $2\text{H}$ , m),  $7.94\text{--}7.65$  ( $17\text{H}$ , m),  $7.53$ , ( $1\text{H}$ , d,  $J = 4.6\text{ Hz}$ ),  $2.81$  ( $3\text{H}$ , s);  $^{13}\text{C NMR}$  ( $100\text{ MHz}$ ,  $\text{CDCl}_3$ )  $\delta$ :  $148.52$  (d,  $J = 10.6\text{ Hz}$ ),  $148.50$  (d,  $J = 22.6\text{ Hz}$ ),  $144.376$  (d,  $J = 117.2\text{ Hz}$ ),  $135.63$  (d,  $J = 3.1\text{ Hz}$ ),  $134.60$  (d,  $J = 10.1\text{ Hz}$ ),  $131.63$ ,  $130.63$  (d,  $J = 1.2\text{ Hz}$ ),  $130.49$  (d,  $J = 12.9\text{ Hz}$ ),  $130.39$ ,  $128.77$ ,  $125.14$  (d,  $J = 26.4\text{ Hz}$ ),  $124.43$  (d,  $J = 1.3\text{ Hz}$ ),  $120.83$  (q,  $J = 321.2\text{ Hz}$ ),  $117.30$  (d,  $J = 88.2\text{ Hz}$ ),  $19.18$  (d,  $J = 1.5\text{ Hz}$ );  $^{19}\text{F NMR}$  ( $365\text{ MHz}$ ,  $\text{CDCl}_3$ )  $\delta$ :  $-78.07$ ;  $^{31}\text{P NMR}$  ( $162\text{ MHz}$ ,  $\text{CDCl}_3$ )  $\delta$ :  $14.41$ ;  $m/z$  LRMS (ESI + APCI) found  $[\text{M} - \text{OTf}]^+$   $404.3$ ,  $\text{C}_{28}\text{H}_{23}\text{NP}^+$  requires  $404.2$ .

### Triphenyl(pyrazin-2-yl)phosphonium trifluoromethanesulfonate (1i)

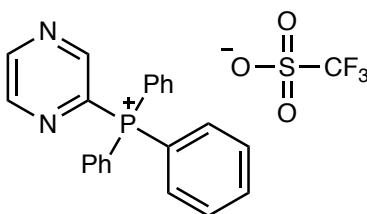

Prepared according to our previous report.<sup>2</sup>  $^1\text{H NMR}$  ( $400\text{ MHz}$ ,  $\text{CDCl}_3$ )  $\delta$ :  $9.09$  ( $1\text{H}$ , br s),  $9.06$  ( $1\text{H}$ , br s),  $8.86$  ( $1\text{H}$ , br s),  $7.91$  ( $3\text{H}$ , m),  $7.82\text{--}7.71$  ( $12\text{H}$ , m);  $^{13}\text{C NMR}$  ( $100\text{ MHz}$ ,  $\text{CDCl}_3$ )  $\delta$ :  $149.72$  (d,  $J =$

24.0 Hz), 149.51 (d,  $J = 3.4$  Hz), 147.25 (d,  $J = 14.7$  Hz), 141.37 (d,  $J = 115.4$  Hz), 136.02 (d,  $J = 3.1$  Hz), 134.54 (d,  $J = 10.4$  Hz), 130.71 (d,  $J = 13.1$  Hz), 120.69 (q,  $J = 321.1$  Hz), 115.71 (d,  $J = 89.3$  Hz). The spectroscopic data is in agreement with our reported synthesis.<sup>2</sup>

### Triphenyl(quinoxalin-2-yl)phosphonium (1j)

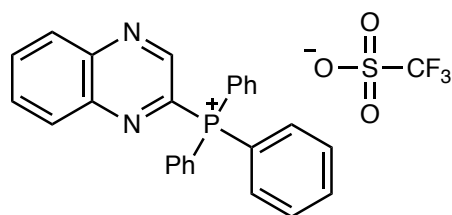

Prepared according to our previous report.<sup>3</sup>  $^1\text{H}$  NMR (400 MHz,  $\text{CDCl}_3$ )  $\delta$ : 8.99 (1H, s), 8.27-8.22 (2H, m), 8.09-8.01 (2H, m), 7.93-7.90 (3H, m), 7.79-7.72 (12H, m);  $^{13}\text{C}$  NMR (100 MHz,  $\text{CDCl}_3$ )  $\delta$ : 145.86 (d,  $J = 25.4$  Hz), 143.38 (d,  $J = 2.8$  Hz), 142.70 (d,  $J = 17.3$  Hz), 140.83 (d,  $J = 111.6$  Hz), 136.16 (d,  $J = 3.1$  Hz), 134.98, 134.66 (d,  $J = 10.5$  Hz), 133.08, 130.86 (d,  $J = 13.0$  Hz), 130.19 (d,  $J = 2.0$  Hz), 129.85 (d,  $J = 2.3$  Hz), 120.76 (q,  $J = 319.5$  Hz), 116.03 (d,  $J = 88.1$  Hz). The spectroscopic data is in agreement with our reported synthesis.<sup>3</sup>

### (5-(4-Methoxyphenyl)pyrimidin-4-yl)triphenylphosphonium trifluoromethanesulfonate (1k)

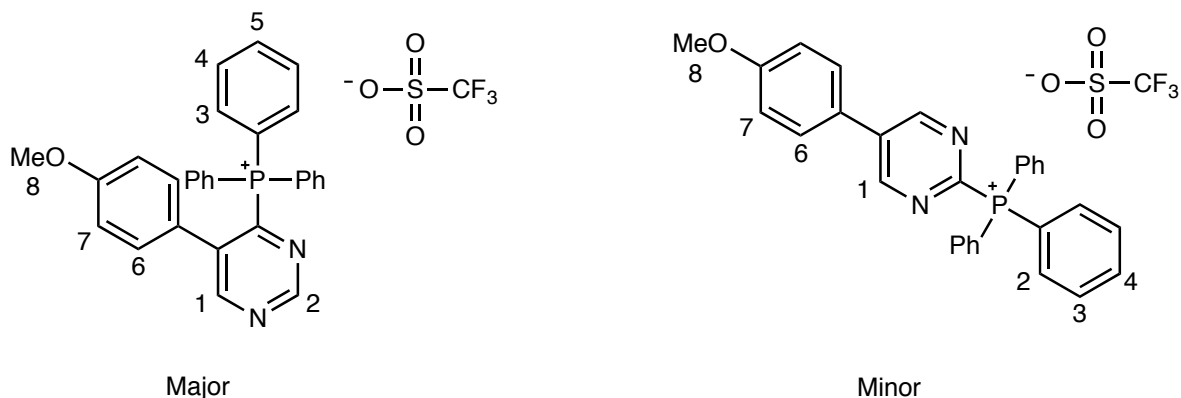

24:1 Mixture of Regioisomers

Prepared according to our previous report.<sup>2</sup> Major isomer,  $^1\text{H}$  NMR (400 MHz,  $\text{CDCl}_3$ )  $\delta$ : 9.44 (1H, s,  $\text{H}_2$ ), 8.98 (1H, d,  $J = 9.0$  Hz,  $\text{H}_1$ ), 7.80-7.70 (3H, m,  $\text{H}_5$ ), 7.67-7.56 (12H, m,  $\text{H}_3$  and  $\text{H}_4$ ), 6.91 (2H, d,  $J$

= 8.7 Hz, H<sub>6</sub>), 6.55 (2H, d, *J* = 8.7 Hz, H<sub>7</sub>), 3.72 (3H, s, H<sub>8</sub>); Minor isomer, <sup>1</sup>H NMR (400 MHz, CDCl<sub>3</sub>) δ: 9.23 (2H, s, H<sub>1</sub>), 7.80-7.70 (3H, m, H<sub>4</sub>), 7.70 (2H, d, *J* = 8.7 Hz, H<sub>5</sub>), 7.67-7.56 (12H, m, H<sub>2</sub> and H<sub>3</sub>), 7.09 (2H, d, *J* = 8.6 Hz, H<sub>6</sub>), 3.88 (3H, s, H<sub>7</sub>); Major isomer, <sup>13</sup>C NMR (100 MHz, CDCl<sub>3</sub>) δ: 161.84 (d, *J* = 5.3 Hz), 160.53, 156.97 (d, *J* = 16.8 Hz), 149.74 (d, *J* = 114.5 Hz), 142.72 (d, *J* = 19.2 Hz), 135.22 (d, *J* = 3.1 Hz), 134.67 (d, *J* = 10.2 Hz), 130.60, 130.25 (d, *J* = 13.1 Hz), 123.61, 120.82 (q, *J* = 321.3 Hz), 117.10 (d, *J* = 88.6 Hz), 114.37, 55.42; Both isomers, <sup>19</sup>F NMR (365 MHz, CDCl<sub>3</sub>) δ: -78.01; Major isomer, <sup>31</sup>P NMR (162 MHz, CDCl<sub>3</sub>) δ: 17.84; *m/z* LRMS (ESI + APCI) found [M-OTf]<sup>+</sup> 447.2, C<sub>29</sub>H<sub>24</sub>N<sub>2</sub>OP<sup>+</sup> requires 447.2. The spectroscopic data is in agreement with our reported synthesis.<sup>2</sup>

**(5-Bromo-2-(methylthio)pyrimidin-4-yl)triphenylphosphonium trifluoromethanesulfonate (11)**

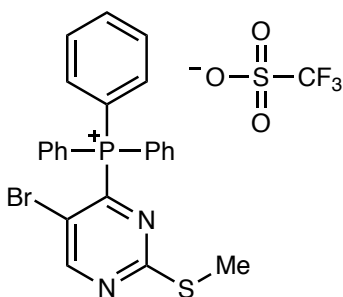

Prepared according to general procedure A using 5-bromo-2-(methylthio)pyrimidine (820 mg, 4.00 mmol), Tf<sub>2</sub>O (0.67 mL, 4.00 mmol), PPh<sub>3</sub> (1.15 g, 4.40 mmol), DBU (0.60 mL, 4.00 mmol) and EtOAc (10 mL). After the purification procedure, the title compound was isolated as a white solid (1.51 g, 2.45 mmol, 61% yield). mp 168-169 °C; IR  $\nu_{\text{max}}$ /cm<sup>-1</sup> (film): 3058, 2989, 1530, 1442, 1379, 1261, 1220, 1201, 1184, 1162, 1107, 1027, 724; <sup>1</sup>H NMR (400 MHz, CDCl<sub>3</sub>) δ: 8.82 (1H, d, *J* = 7.9 Hz), 7.97-7.85 (3H, m), 7.83-7.66 (12H, m), 2.15 (3H, s); <sup>13</sup>C NMR (100 MHz, CDCl<sub>3</sub>) δ: 173.86 (d, *J* = 17.2 Hz), 161.98 (d, *J* = 4.1 Hz), 151.47 (d, *J* = 118.7 Hz), 136.06 (d, *J* = 3.1 Hz), 134.75 (d, *J* = 10.4 Hz), 130.74 (d, *J* = 13.3 Hz), 120.86 (q, *J* = 321.2 Hz), 120.85 (d, *J* = 17.1 Hz), 115.00 (d, *J* = 89.9 Hz), 14.43; <sup>19</sup>F NMR (365 MHz, CDCl<sub>3</sub>) δ: -78.08; <sup>31</sup>P NMR (162 MHz, CDCl<sub>3</sub>) δ: 24.37; *m/z* LRMS (ESI + APCI) found [M - OTf]<sup>+</sup> 465.2, C<sub>23</sub>H<sub>19</sub>BrN<sub>2</sub>PS<sup>+</sup> requires 465.0.

**(7-Methyl-7H-pyrrolo[2,3-d]pyrimidin-4-yl)triphenylphosphonium trifluoromethanesulfonate (1m)**

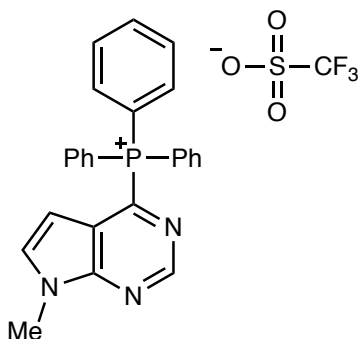

Prepared according to general procedure A using 7-methyl-7H-pyrrolo[2,3-d]pyrimidine (592 mg, 4.45 mmol), Tf<sub>2</sub>O (0.75 mL, 4.45 mmol), PPh<sub>3</sub> (1.28 g, 4.89 mmol), DBU (0.67 mL, 4.45 mmol) and CH<sub>2</sub>Cl<sub>2</sub> (45 mL). After the purification procedure, the title compound was isolated as a purple crystalline solid (0.57 g, 1.05 mmol, 24% yield); mp 184-189 °C; IR ν<sub>max</sub>/cm<sup>-1</sup> (film): 3061, 2972, 1539, 1514, 1436, 1407, 1335, 1263, 1240, 1225, 1139, 1108, 1099, 1030, 728; <sup>1</sup>H NMR (400 MHz, CDCl<sub>3</sub>) δ: 9.12 (1H, s), 7.99-7.86 (3H, m), 7.81-7.66 (12H, m), 7.63 (1H, d, *J* = 3.6 Hz), 5.31 (1H, d, *J* = 3.6 Hz), 3.98 (3H, s); <sup>13</sup>C NMR (100 MHz, CDCl<sub>3</sub>) δ: 151.64 (d, *J* = 9.9 Hz), 150.62 (d, *J* = 18.5 Hz), 142.07 (d, *J* = 118.7 Hz), 136.55, 136.04 (d, *J* = 3.1 Hz), 134.83 (d, *J* = 10.3 Hz), 130.63 (d, *J* = 13.0 Hz), 123.49 (d, *J* = 24.4 Hz), 120.88 (q, *J* = 321.0 Hz), 116.67 (d, *J* = 88.7), 98.28, 31.65; <sup>19</sup>F NMR (365 MHz, CDCl<sub>3</sub>) δ: -78.13; <sup>31</sup>P NMR (162 MHz, CDCl<sub>3</sub>) δ: 13.29; *m/z* LRMS (ESI + APCI) found [M - OTf]<sup>+</sup> 394.3, C<sub>25</sub>H<sub>21</sub>N<sub>3</sub>P<sup>+</sup> requires 394.2.

**(2-(Bis(3-(trifluoromethyl)phenyl)methyl)pyridin-4-yl)triphenylphosphonium trifluoromethanesulfonate (1n)**

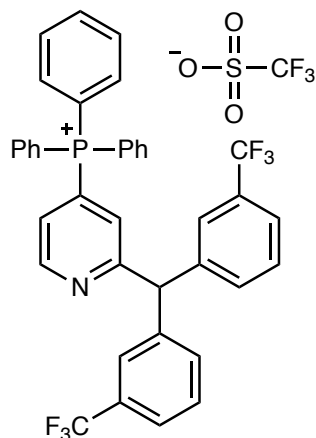

Prepared according to general procedure A (except the reaction was warmed to  $-30\text{ }^{\circ}\text{C}$  before the addition of triphenylphosphine and the reaction was then stirred at  $-30\text{ }^{\circ}\text{C}$  for 30 minutes instead  $-78\text{ }^{\circ}\text{C}$ ) using 2-(bis(3-(trifluoromethyl)phenyl)methyl)pyridine (762 mg, 2.00 mmol),  $\text{Tf}_2\text{O}$  (336  $\mu\text{L}$ , 2.00 mmol),  $\text{PPh}_3$  (576 mg, 2.10 mmol), DBU (299  $\mu\text{L}$ , 2.0 mmol) and  $\text{CH}_2\text{Cl}_2$  (20 mL). After the purification procedure, the title compound was isolated as a pale orange solid (1.37 g, 1.73 mmol, 87% yield). mp  $64\text{-}69\text{ }^{\circ}\text{C}$ ; IR  $\nu_{\text{max}}/\text{cm}^{-1}$  (film): 3065, 1577, 1439, 1327, 1259, 1224, 1153, 1109, 1075, 1029, 725, 636;  $^1\text{H}$  NMR (400 MHz,  $\text{CDCl}_3$ )  $\delta$ : 8.99 (1H, app t,  $J = 5.1$  Hz), 7.91-7.80 (3H, m), 7.78-7.66 (6H, m), 7.63-7.37 (15H, m), 7.29 (1H, d,  $J = 13.8$  Hz), 5.97 (1H, s);  $^{13}\text{C}$  NMR (100 MHz,  $\text{CDCl}_3$ )  $\delta$ : 164.02 (d,  $J = 9.8$ ), 151.56 (d,  $J = 10.4$  Hz), 141.69, 136.10 (d,  $J = 3.1$  Hz), 134.31 (d,  $J = 10.5$  Hz), 132.90 (d,  $J = 1.1$  Hz), 130.89 (d,  $J = 13.1$  Hz), 130.73 (q,  $J = 32.2$  Hz), 129.99, 129.57 (d,  $J = 83.7$  Hz), 126.99 (d,  $J = 8.7$  Hz), 125.65-125.39 (2C, m), 124.04 (q,  $J = 3.8$  Hz), 123.83 (q,  $J = 272.5$  Hz), 120.78 (q,  $J = 321.2$  Hz), 115.44 (d,  $J = 89.5$  Hz), 57.75;  $^{19}\text{F}$  NMR (365 MHz,  $\text{CDCl}_3$ )  $\delta$ :  $-62.46$ ,  $-78.13$ ;  $^{31}\text{P}$  NMR (162 MHz,  $\text{CDCl}_3$ )  $\delta$ : 22.38;  $m/z$  LRMS (ESI + APCI) found  $[\text{M} - \text{OTf}]^+$  642.4,  $\text{C}_{38}\text{H}_{27}\text{F}_6\text{NP}^+$  requires 642.2.

**(2-((4-Chlorophenyl)((1-(ethoxycarbonyl)piperidin-4-yl)oxy)methyl)pyridin-4-yl) triphenylphosphonium trifluoromethanesulfonate (1o)**

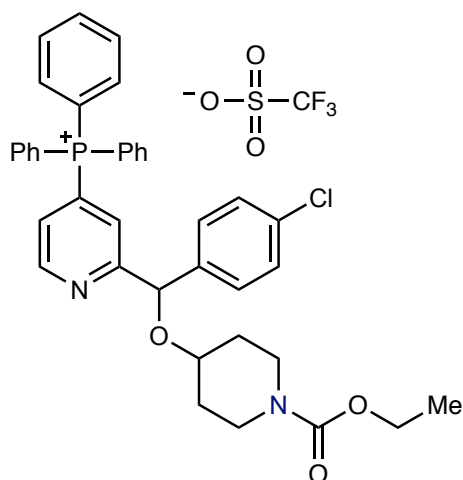

Prepared according to general procedure A (except that the reaction was warmed to  $-50\text{ }^{\circ}\text{C}$  before the addition of  $\text{PPh}_3$  and was stirred at  $-50\text{ }^{\circ}\text{C}$  for 30 minutes) using ethyl 4-((4-chlorophenyl)(pyridin-2-yl)methoxy)piperidine-1-carboxylate (750 mg, 2.00 mmol),  $\text{Tf}_2\text{O}$  (0.34 mL, 2.00 mmol),  $\text{PPh}_3$  (0.58 g, 2.20 mmol), DBU (0.30 mL, 2.00 mmol) and  $\text{CH}_2\text{Cl}_2$  (20 mL). After the purification procedure, the title compound was isolated as a white solid (1.15 g, 1.47 mmol, 73% yield). mp  $95\text{-}98\text{ }^{\circ}\text{C}$ ; IR  $\nu_{\text{max}}/\text{cm}^{-1}$  (film): 3063, 2928, 1686, 1438, 1382, 1261, 1223, 1146, 1108, 1084, 1029, 636;  $^1\text{H}$  NMR (400 MHz,  $\text{CDCl}_3$ )  $\delta$ : 8.90 (1H, t,  $J = 5.1$  Hz), 7.94-7.86 (3H, m), 7.82-7.73 (6H, m), 7.71-7.59 (7H, m), 7.49 (1H, ddd,  $J = 12.6, 5.0, 1.1$  Hz), 7.34-7.25 (4H, m), 5.71 (1H, s), 4.11 (2H, q,  $J = 7.1$  Hz), 3.70-3.60 (1H, m), 3.55-3.42 (2H, m), 3.25-3.12 (2H, m), 1.79-1.56 (2H, m), 1.54-1.37 (2H, m), 1.25 (3H, t,  $J = 7.1$  Hz);  $^{13}\text{C}$  NMR (100 MHz,  $\text{CDCl}_3$ )  $\delta$ : 164.37 (d,  $J = 9.6$  Hz), 155.43, 151.10 (d,  $J = 10.5$  Hz), 138.68, 136.16 (d,  $J = 3.1$  Hz), 134.53 (d,  $J = 10.5$  Hz), 134.01, 130.95 (d,  $J = 13.1$  Hz), 129.28 (d,  $J = 84.1$  Hz), 128.81, 128.47, 125.92 (d,  $J = 8.4$  Hz), 123.86 (d,  $J = 9.1$  Hz), 120.83 (q,  $J = 321.2$  Hz), 115.80 (d,  $J = 89.4$  Hz), 79.94, 72.82, 61.29, 40.69 (rot), 40.66, 31.29, 30.35 (rot), 14.68;  $^{19}\text{F}$  NMR (365 MHz,  $\text{CDCl}_3$ )  $\delta$ : -78.15;  $^{31}\text{P}$  NMR (162 MHz,  $\text{CDCl}_3$ )  $\delta$ : 22.67;  $m/z$  LRMS (ESI + APCI) found  $[\text{M} - \text{OTf}]^+$  635.3,  $\text{C}_{38}\text{H}_{37}\text{ClN}_2\text{O}_3\text{P}^+$  requires 635.2.

**(R)-2-((1-(Tert-butoxycarbonyl)pyrrolidin-2-yl)methoxy)pyrimidin-4-yl)triphenylphosphonium trifluoromethanesulfonate (1p)**

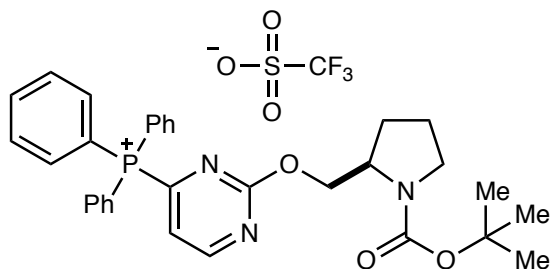

An oven dried round bottom flask equipped with a stir bar was charged with *tert*-butyl (*R*)-2-((pyrimidin-2-yloxy)methyl)pyrrolidine-1-carboxylate (249 mg, 0.89 mmol) and PPh<sub>3</sub> (257 mg, 0.98 mmol). The round bottom flask was placed under a nitrogen atmosphere, EtOAc (4.5 mL) was added, and the reaction vessel was cooled to  $-50\text{ }^{\circ}\text{C}$  before Tf<sub>2</sub>O (150  $\mu\text{L}$ , 0.89 mmol) was added dropwise over 5 minutes. The reaction was stirred for 30 minutes before DBU (133  $\mu\text{L}$ , 0.89 mmol) was added dropwise via syringe, the cooling bath was removed and the reaction was allowed to warm to room temperature while stirring (approximately 15-30 minutes). The reaction mixture was quenched with H<sub>2</sub>O (approximately the same volume as CH<sub>2</sub>Cl<sub>2</sub>) and the mixture was transferred to a separatory funnel. The mixture was diluted with CH<sub>2</sub>Cl<sub>2</sub> and the resulting organic layer was washed three times with H<sub>2</sub>O. The organic layer was dried (MgSO<sub>4</sub>), filtered and concentrated *in vacuo*. Approximately 2 mL of CH<sub>2</sub>Cl<sub>2</sub> was added to reaction mixture and was then added dropwise to an excess of chilled Et<sub>2</sub>O (0  $^{\circ}\text{C}$ ). The flask was then placed in a  $-20\text{ }^{\circ}\text{C}$  refrigerator for approximately 4.5 h. The resulting suspension was filtered on a frit, the solid washed with chilled Et<sub>2</sub>O (0  $^{\circ}\text{C}$ ), and dried *in vacuo* to provide the pure phosphonium salt. After the purification procedure, the title compound was isolated as a white solid (471 mg, 0.68 mmol, 77% yield). mp 51-54  $^{\circ}\text{C}$ ; IR  $\nu_{\text{max}}/\text{cm}^{-1}$  (film): 3064, 2976, 1684, 1560, 1544, 1424, 1393, 1367, 1260, 1149, 1029, 726; <sup>1</sup>H NMR (400 MHz, CDCl<sub>3</sub>)  $\delta$ : 8.91, (1H, dd,  $J = 8.2, 4.8$  Hz), 7.90-7.80 (3H, m), 7.77-7.59 (12H, m), 7.49 (1H, br s), 4.45-4.30 (1H, m), 4.29-4.15 (1H, m), 4.14-4.03 (1H, m), 3.29 (2H, s), 2.05-1.69 (4H, m), 1.43-1.24 (9H, m); <sup>13</sup>C NMR (100 MHz, CDCl<sub>3</sub>)  $\delta$ : 165.06 (d,  $J = 19.3$  Hz), 163.16 (d,  $J = 8.6$  Hz), 156.69-154.78 (m), 154.63-153.87 (m), 135.97 (d,  $J = 2.9$  Hz), 134.58 (d,  $J = 10.3$  Hz), 130.56 (d,  $J = 13.1$  Hz), 121.43 (d,  $J = 19.9$  Hz), 120.60 (q,  $J = 321.2$  Hz), 115.05 (d,  $J = 88.9$  Hz), 79.63-78.90 (m), 68.93 (rot), 68.55, 55.20, 46.64, 46.23 (rot), 28.72-27.47 (2C, m), 23.47-22.71 (rot); <sup>19</sup>F NMR (365 MHz, CDCl<sub>3</sub>)  $\delta$ :  $-78.17$ ; <sup>31</sup>P NMR (162 MHz, CDCl<sub>3</sub>)  $\delta$ : 16.10; *m/z* LRMS

(ESI + APCI) found  $[M - OTf]^+$  540.4,  $C_{32}H_{35}N_3O_3P^+$  requires 540.2.

**(5-(3-Fluoro-4-(trifluoromethoxy)phenyl)pyrimidin-4-yl)triphenylphosphonium trifluoromethanesulfonate (1q)**

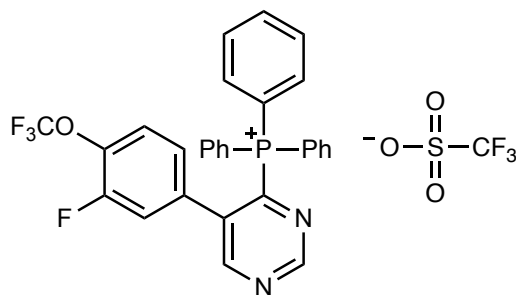

An oven dried round bottom flask equipped with a stir bar was charged with 5-(3-fluoro-4-(trifluoromethoxy)phenyl)pyrimidine (307 mg, 1.19 mmol) and  $PPh_3$  (344 mg, 1.31 mmol). The round bottom flask was placed under a nitrogen atmosphere, EtOAc (6 mL) was added, and the reaction vessel was cooled to  $-50\text{ }^\circ\text{C}$  before  $Tf_2O$  (200  $\mu\text{L}$ , 1.19 mmol) was added dropwise over 5 minutes. The reaction was stirred for 30 minutes before DBU (178  $\mu\text{L}$ , 1.19 mmol) was added dropwise via syringe, the cooling bath was removed and the reaction was allowed to warm to room temperature while stirring (approximately 15-30 minutes). The reaction mixture was quenched with  $H_2O$  (approximately the same volume as  $CH_2Cl_2$ ) and the mixture was transferred to a separatory funnel. The mixture was diluted with  $CH_2Cl_2$  and the resulting organic layer was washed six times with  $H_2O$ . The organic layer was dried ( $MgSO_4$ ), filtered and concentrated *in vacuo*. Approximately 2 mL of  $CH_2Cl_2$  was added to the crude mixture which was then added dropwise to an excess of 1:1  $Et_2O$ :hexanes to give a fine suspension. The flask was then placed in a  $-20\text{ }^\circ\text{C}$  refrigerator until a viscous oil settled at the bottom of the flask. The excess solvent was poured off and additional 1:1  $Et_2O$ :hexanes was added, the mixture was stirred and decanted. This process was repeated twice more, and the resulting viscous oil was concentrated *in vacuo* to give the pure phosphonium salt as a tan solid (538 g, 0.81 mmol, 68% yield). mp  $61\text{-}65\text{ }^\circ\text{C}$ ; IR  $\nu_{\text{max}}/\text{cm}^{-1}$  (film): 3065, 1624, 1439, 1400, 1257, 1217, 1147, 721, 636;  $^1\text{H}$  NMR (400 MHz,  $CDCl_3$ )  $\delta$ : 9.50 (1H, s), 8.90 (1H, d,  $J = 8.8$  Hz), 7.82-7.51 (16H, m), 6.98, (1H, d,  $J = 8.6$  Hz), 6.35 (1H, d,  $J = 10.0$  Hz);  $^{13}\text{C}$  NMR (100 MHz,  $CDCl_3$ )  $\delta$ : 162.00 (d,  $J = 5.3$  Hz), 158.21 (d,  $J = 248.49$  Hz), 157.73 (d,  $J = 16.6$  Hz), 151.69 (d,  $J = 116.9$  Hz), 150.75 (dd,  $J = 10.8, 1.6$  Hz), 135.26 (d,  $J = 3.0$  Hz), 135.04, 134.85 (d,  $J = 10.3$  Hz), 132.95 (d,  $J = 2.4$  Hz), 129.93 (d,  $J = 13.2$  Hz), 120.54 (q,  $J = 321.1$  Hz),



119.84 (q,  $J = 259.5$  Hz), 118.78 (d,  $J = 15.1$  Hz), 117.36. 116.46 (d,  $J = 88.8$ ), 107.87 (d,  $J = 25.4$  Hz);  $^{19}\text{F}$  NMR (365 MHz,  $\text{CDCl}_3$ )  $\delta$ : -57.70, -78.30, -107.25 (t,  $J = 10.1$  Hz);  $^{31}\text{P}$  NMR (162 MHz,  $\text{CDCl}_3$ )  $\delta$ : 17.12;  $m/z$  LRMS (ESI + APCI) found  $[\text{M} - \text{OTf}]^+$  519.3,  $\text{C}_{29}\text{H}_{20}\text{F}_4\text{N}_2\text{OP}^+$  requires 519.1.

**(3-(3-Fluoro-5-(5-(trifluoromethyl)pyridin-2-yl)phenyl)phenyl)pyridin-4-yl)triphenylphosphonium trifluoromethanesulfonate (1r)**

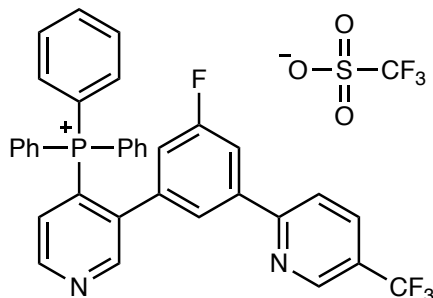

Prepared according to general procedure A using 2-(3-fluoro-5-(pyridin-3-yl)phenyl)-5-(trifluoromethyl)pyridine (1.27 g, 4.00 mmol),  $\text{Tf}_2\text{O}$  (0.67 mL, 4.00 mmol),  $\text{PPh}_3$  (1.15 g, 4.40 mmol), DBU (0.60 mL, 4.00 mmol) and  $\text{CH}_2\text{Cl}_2$  (40 mL). After the purification procedure, the title compound was isolated as a white solid (1.92 g, 2.64 mmol, 66% yield). mp 209-211 °C; IR  $\nu_{\text{max}}/\text{cm}^{-1}$  (film): 3067, 1595, 1445, 1439, 1328, 1262, 1138, 1124, 1110, 1101, 1082, 1030, 719, 636;  $^1\text{H}$  NMR (400 MHz,  $\text{CDCl}_3$ )  $\delta$ : 8.98 (1H, app t,  $J = 4.8$  Hz), 8.78 (1H, d,  $J = 6.8$  Hz), 8.72 (1H, br s), 7.98 (1H, dd,  $J = 8.3, 1.8$  Hz), 7.77-7.56 (17H, m), 7.51-7.42 (2H, m), 6.53 (1H, d,  $J = 8.2$  Hz);  $^{13}\text{C}$  NMR (100 MHz,  $\text{CDCl}_3$ )  $\delta$ : 162.25 (d,  $J = 249.6$  Hz), 156.95, 153.34, 150.62 (d,  $J = 10.3$  Hz), 146.22 (q,  $J = 4.1$  Hz), 139.97 (d,  $J = 8.1$  Hz), 139.84 (dd,  $J = 6.7, 2.1$  Hz), 137.12 (dd,  $J = 8.3, 4.2$  Hz), 135.42 (d,  $J = 3.1$  Hz), 134.66-134.28 (2C, m), 130.65 (d,  $J = 13.1$  Hz), 128.45 (d,  $J = 9.3$  Hz), 126.68 (d,  $J = 83.3$  Hz), 125.79 (q,  $J = 33.2$  Hz), 124.82-124.63 (m), 123.41 (q,  $J = 272.3$  Hz), 120.81 (q,  $J = 321.0$  Hz), 120.50, 117.49 (d,  $J = 23.1$  Hz), 116.89 (d,  $J = 88.8$  Hz), 114.59 (d,  $J = 23.0$  Hz);  $^{19}\text{F}$  NMR (365 MHz,  $\text{CDCl}_3$ )  $\delta$ : -62.35, -78.20, -110.86;  $^{31}\text{P}$  NMR (162 MHz,  $\text{CDCl}_3$ )  $\delta$ : 21.30;  $m/z$  LRMS (ESI + APCI) found  $[\text{M} - \text{OTf}]^+$  579.2,  $\text{C}_{35}\text{H}_{24}\text{F}_4\text{N}_2\text{P}^+$  requires 579.2.

**Triphenyl(3'-(trifluoromethyl)-[2,2':5',3''-terpyridin]-4''-yl)phosphonium trifluoromethanesulfonate (1s)**

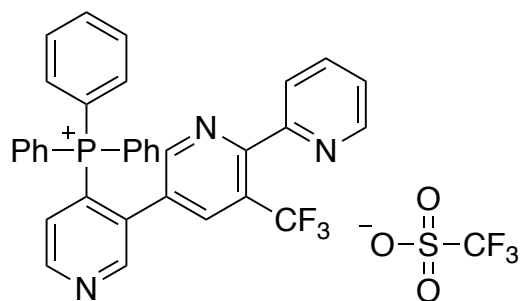

13.4:1:1 Mixture of Regioisomers

Prepared according to general procedure A (except that the reaction was warmed to  $-30\text{ }^{\circ}\text{C}$  before the addition of  $\text{PPh}_3$  and was stirred at  $-30\text{ }^{\circ}\text{C}$  for 30 minutes) using 3'-(trifluoromethyl)-2,2':5',3''-terpyridine (407 mg, 1.35 mmol),  $\text{Tf}_2\text{O}$  (0.23 mL, 1.35 mmol),  $\text{PPh}_3$  (0.39 g, 1.49 mmol), DBU (0.20 mL, 1.35 mmol) and  $\text{CH}_2\text{Cl}_2$  (13.5 mL). After the purification procedure, the title compound (13.4:1:1 mixture of regioisomers determined by  $^{31}\text{P}$  NMR)<sup>‡</sup> was isolated as a white solid (0.75 g, 1.06 mmol, 78% yield). Mixture of isomers, IR  $\nu_{\text{max}}/\text{cm}^{-1}$  (film): 3064, 1588, 1438, 1262, 1224, 1141, 1108, 1030, 721; Major Isomer,  $^1\text{H}$  NMR (400 MHz,  $\text{CDCl}_3$ )  $\delta$ : 9.08 (1H, app t,  $J = 4.7$  Hz), 8.79 (1H, d,  $J = 6.8$  Hz), 8.70 (1H, d,  $J = 4.7$  Hz), 8.27 (1H, d,  $J = 1.7$  Hz), 7.87-7.58 (18H, m), 7.55 (1H, d,  $J = 7.8$  Hz), 7.39 (1H, dd,  $J = 7.8, 4.7$  Hz); Major Isomer,  $^{13}\text{C}$  NMR (100 MHz,  $\text{CDCl}_3$ )  $\delta$ : 156.12, 155.29, 153.09 (d,  $J = 7.3$  Hz), 151.27 (d,  $J = 9.9$  Hz), 150.97, 150.56, 148.83, 136.40, 136.24-136.07(m), 135.86 (d,  $J = 6.5$  Hz), 135.65 (d,  $J = 2.8$  Hz), 134.18 (d,  $J = 10.3$  Hz), 130.70 (d,  $J = 13.0$  Hz), 128.73 (d,  $J = 9.0$  Hz), 127.45 (d,  $J = 83.1$  Hz), 123.95 (q,  $J = 33.8$  Hz), 123.77, 123.39, 122.19 (q,  $J = 273.7$  Hz), 120.57 (q,  $J = 321.3$  Hz), 116.19 (d,  $J = 88.6$  Hz);  $^{19}\text{F}$  NMR (365 MHz,  $\text{CDCl}_3$ )  $\delta$ :  $-57.97, -78.20$ ;  $^{31}\text{P}$  NMR (162 MHz,  $\text{CDCl}_3$ )  $\delta$ : 21.05;  $m/z$  LRMS (ESI + APCI) found  $[\text{M} - \text{OTf}]^+$  562.2,  $\text{C}_{34}\text{H}_{24}\text{F}_3\text{N}_3\text{P}^+$  requires 562.2.

<sup>‡</sup> The crude regiomer ratio was determined prior to precipitation by taking a portion of the crude mixture, concentrating *in vacuo* and analyzing by  $^{31}\text{P}$  NMR to be 9.6:1.3:1.

**(2-(1-(4-chlorophenyl)-3-(dimethylamino)propyl)pyridin-4-yl)triphenylphosphonium trifluoromethanesulfonate (1t)**

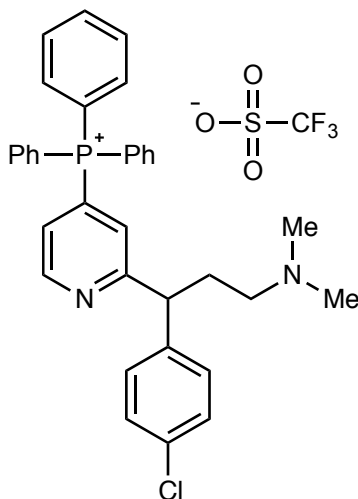

Prepared according to our previous report.<sup>2</sup> <sup>1</sup>H NMR (400 MHz, CDCl<sub>3</sub>) δ: 8.97 (1H, app t, *J* = 5.1 Hz, H<sub>1</sub>), 7.93-7.86 (3H, m, H<sub>6</sub>), 7.80-7.70 (6H, m, H<sub>5</sub>), 7.61-7.50 (6H, m, H<sub>4</sub>), 7.39 (1H, ddd, *J* = 12.8, 5.1, 1.5 Hz, H<sub>2</sub>), 7.25-7.16 (5H, m, H<sub>3</sub>, H<sub>7</sub>, and H<sub>8</sub>), 4.28 (1H, app t, *J* = 6.8 Hz, H<sub>9</sub>), 2.56-2.43 (1H, m, H<sub>10</sub>), 2.32-2.11 (9H, m, H<sub>10</sub>, H<sub>11</sub>, and H<sub>12</sub>); <sup>13</sup>C NMR (100 MHz, CDCl<sub>3</sub>) δ: 165.55 (d, *J* = 9.9 Hz), 150.97 (d, *J* = 9.9 Hz), 140.26, 135.82 (d, *J* = 3.1 Hz), 134.02 (d, *J* = 10.7 Hz), 132.25, 130.61 (d, *J* = 13.0 Hz), 128.92 (d, *J* = 85.5 Hz), 128.75, 127.92, 126.26 (d, *J* = 8.4 Hz), 124.42 (d, *J* = 7.6 Hz), 120.46 (q, *J* = 321.2 Hz), 115.31 (d, *J* = 89.3 Hz), 56.73, 49.77, 44.88, 31.99. The spectroscopic data is in agreement with our reported synthesis.<sup>2</sup>

**(8-Chloro-11-(1-(ethoxycarbonyl)piperidin-4-ylidene)-6,11-dihydro-5Hbenzo[5,6]cyclohepta[1,2-b]pyridin-4-yl)triphenylphosphonium trifluoromethanesulfonate (1u)**

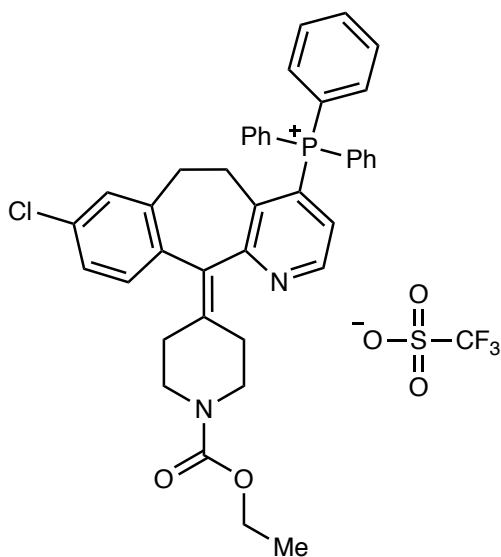

Prepared according to our previous report.<sup>2</sup> <sup>1</sup>H NMR (400 MHz, CDCl<sub>3</sub>) δ: 8.73 (1H, app t, *J* = 5.0 Hz), 7.97-7.87 (3H, m), 7.86-7.74 (6H, m), 7.73-7.60 (6H, m), 7.16-7.01 (3H, m), 6.71 (1H, s), 4.14 (2H, q, *J* = 7.0 Hz), 3.84-3.61 (2H, m), 3.45- 3.20 (3H, m), 2.75 (1H, dt, *J* = 17.4, 4.7 Hz), 2.58 (1H, dt, *J* = 14.9, 4.7 Hz), 2.53-2.30 (3H, m), 2.26-2.09 (1H, m), 1.60-1.43 (1H, m), 1.25 (3H, t, *J* = 7.2 Hz); <sup>13</sup>C NMR (100 MHz, CDCl<sub>3</sub>) δ: 163.64 (d, *J* = 8.3 Hz), 155.37, 149.08 (d, *J* = 11.4 Hz), 139.23, 136.84, 136.66 (d, *J* = 6.8 Hz), 136.06 (d, *J* = 3.1 Hz), 134.21 (d, *J* = 10.7 Hz), 133.95, 133.57, 132.37, 131.58, 131.13 (d, *J* = 13.0 Hz), 129.85, 127.22 (d, *J* = 10.0 Hz), 127.01 (d, *J* = 82.2 Hz), 126.43, 120.78 (q, *J* = 321.3 Hz), 116.42 (d, *J* = 88.5 Hz), 61.39, 44.65, 44.41, 30.74, 30.46, 30.39, 29.39, 14.59. The spectroscopic data is in agreement with our reported synthesis.<sup>2</sup>

**((6*S*,10*R*)-8-Benzyl-7,8,9,10-tetrahydro-6*H*-6,10-methanoazepino[4,5-*g*]quinoxalin-2-yl)triphenylphosphonium (1v)**

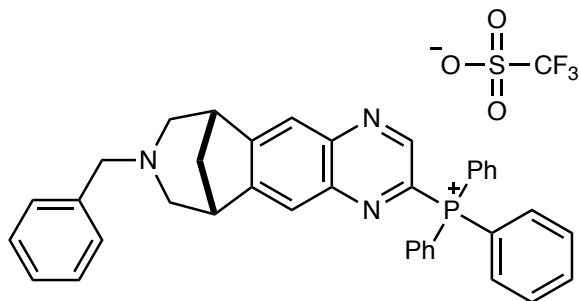

Prepared according to our previous report.<sup>2</sup> <sup>1</sup>H NMR (400 MHz, CDCl<sub>3</sub>) δ: 9.09 (1H, s), 8.10-7.72 (17H, m), 7.20-7.05 (3H, m), 6.92-6.80 (2H, m), 3.55-3.27 (4H, m), 3.03-2.87 (2H, m), 2.66-2.42 (2H, m), 2.29-2.15 (1H, m), 1.87 (1H, d, *J* = 10.8 Hz); <sup>13</sup>C NMR (100 MHz, CDCl<sub>3</sub>) δ: 144.90 (d, *J* = 23.5 Hz), 144.21, 143.45 (d, *J* = 16.9 Hz), 137.51 (br s), 136.00 (d, *J* = 2.9 Hz), 134.55 (d, *J* = 10.9 Hz), 130.72 (d, *J* = 13.0 Hz), 129.20-126.21 (3C, m), 120.69 (br s), 120.67 (q, *J* = 321.5 Hz), 116.42 (d, *J* = 88.3 Hz), 61.29, 57.90-56.06 (2C, m), 43.14-40.43 (3C, m). The spectroscopic data is in agreement with our reported synthesis.<sup>2</sup>

**(5-Chloro-6'-methyl-3-(4-(methylsulfonyl)phenyl)-[2,3'-bipyridin]-4'-yl)triphenylphosphonium trifluoromethanesulfonate (1w)**

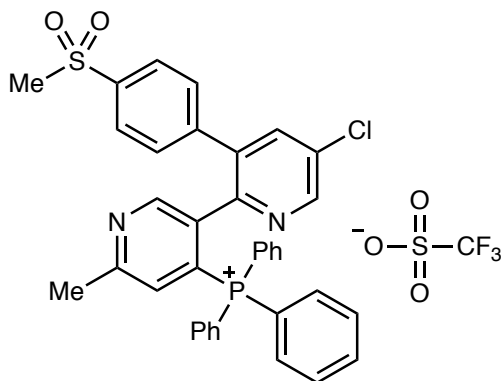

Prepared according to our previous report.<sup>3</sup> <sup>1</sup>H NMR (400 MHz, CDCl<sub>3</sub>) δ: 8.28 (1H, d, *J* = 7.1 Hz), 8.10 (2H, d, *J* = 8.2 Hz), 7.86-7.62 (16H, m), 7.51-7.45 (3H, m), 7.20 (1H, d, *J* = 16.5 Hz), 3.14 (3H, s),

2.54 (3H, s);  $^{13}\text{C}$  NMR (100 MHz,  $\text{CDCl}_3$ )  $\delta$ : 160.84 (d,  $J = 11.2$  Hz), 152.42 (d,  $J = 7.3$  Hz), 147.53 (d,  $J = 2.2$  Hz), 146.09, 141.53, 141.02, 138.92, 135.62, 134.84 (d,  $J = 2.9$  Hz), 134.17 (d,  $J = 10.0$  Hz), 133.29 (d,  $J = 3.6$  Hz), 132.10, 130.76 (d,  $J = 10.2$  Hz), 130.03 (d,  $J = 13.1$  Hz), 129.86, 128.55, 128.19 (d,  $J = 86.2$  Hz), 120.77 (q,  $J = 321.1$  Hz), 119.34 (d,  $J = 91.8$  Hz), 43.96, 24.55. The spectroscopic data is in agreement with our reported synthesis.<sup>3</sup>

**(3-(2-((2-Methyl-5-(4-((4-methylpiperazin-1-yl)methyl)benzamido)phenyl)amino)pyrimidin-4-yl)pyridin-4-yl)triphenylphosphonium trifluoromethanesulfonate and (2-((2-Methyl-5-(4-((4-methylpiperazin-1-yl)methyl)benzamido)phenyl)amino)-6-(pyridin-3-yl)pyrimidin-4-yl)triphenylphosphonium trifluoromethanesulfonate (1x)**

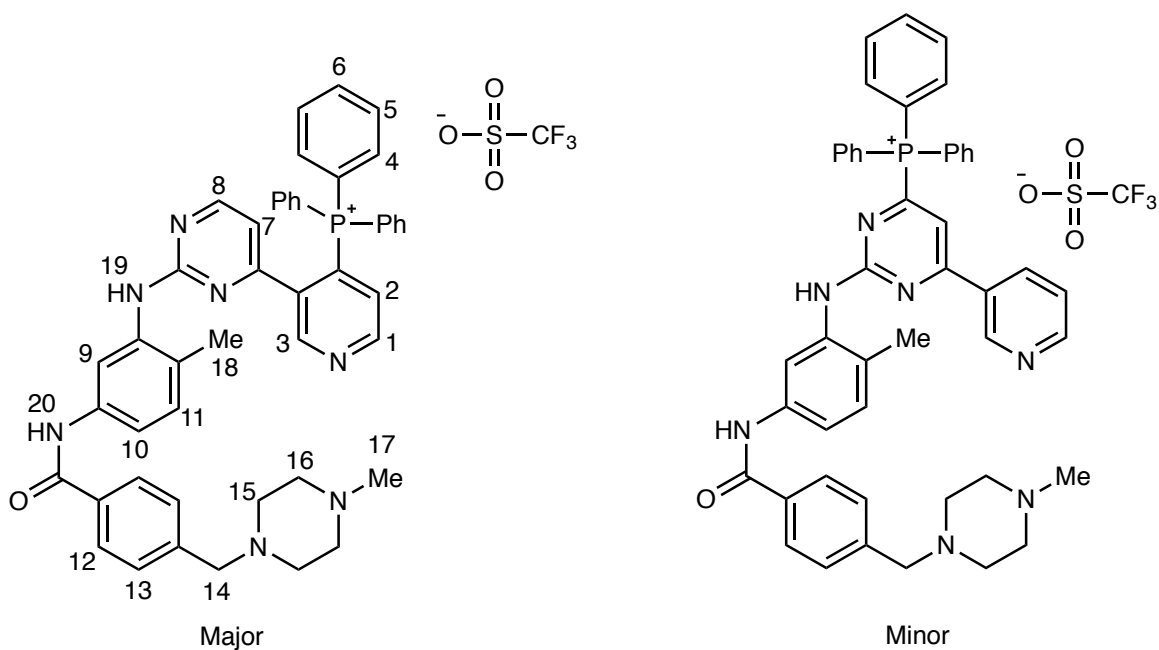

20:1 Mixture of Regioisomers

Prepared according to our previous report.<sup>4</sup> Major isomer,  $^1\text{H}$  NMR (400 MHz,  $\text{DMSO-d}_6$ )  $\delta$ : 10.14 (1H, s,  $\text{H}_{20}$ ), 9.55 (1H, d,  $J = 6.7$  Hz,  $\text{H}_3$ ), 9.09 (1H, app t,  $J = 4.6$  Hz,  $\text{H}_1$ ), 8.31 (1H, d,  $J = 5.1$  Hz,  $\text{H}_8$ ), 8.00-7.55 (18H, m,  $\text{H}_4$ ,  $\text{H}_5$ ,  $\text{H}_6$ ,  $\text{H}_9$ , and  $\text{H}_{12}$ ), 7.52-7.20 (5H, m,  $\text{H}_2$ ,  $\text{H}_7$ ,  $\text{H}_{10}$ , and  $\text{H}_{13}$ ), 7.08 (1H, d,  $J = 8.3$  Hz,  $\text{H}_{11}$ ), 6.10 (1H, br,  $\text{H}_{19}$ ), 3.55 (2H, s,  $\text{H}_{14}$ ), 2.70-2.13 (11H, m,  $\text{H}_{15}$ ,  $\text{H}_{16}$ , and  $\text{H}_{18}$ ), 1.74 (3H, s,  $\text{H}_{17}$ ); Major isomer,  $^{13}\text{C}$  NMR (100 MHz,  $\text{DMSO-d}_6$ )  $\delta$ : 165.15, 159.79, 159.72 (d,  $J = 2.0$  Hz), 158.29, 152.67 (d,  $J = 11.4$  Hz), 151.77 (d,  $J = 6.8$  Hz), 141.14 (br), 137.28, 136.16, 135.81 (d,  $J = 3.8$  Hz),

134.70 (d,  $J = 2.3$  Hz), 133.91 (d,  $J = 10.0$  Hz), 130.75 (d,  $J = 10.2$  Hz), 129.96, 129.95 (d,  $J = 13.4$  Hz), 128.74, 127.70, 125.67 (d,  $J = 86.2$  Hz), 125.48, 120.67 (q,  $J = 322.8$  Hz), 119.54 (d,  $J = 92.3$  Hz), 117.03, 117.00, 115.56, 110.34, 60.65, 53.15, 50.09, 43.09, 16.99. The spectroscopic data is in agreement with our reported synthesis.<sup>4</sup>

#### 4. Preparation of Heterocyclic Iminophosphoranes

##### General procedure B

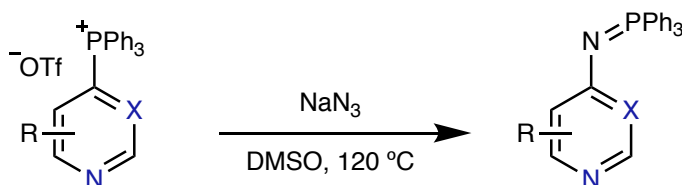

Care should be taken when handling sodium azide. We recommend conducting these reactions behind a blast shield. For proper storage, handling, and waste protocols, see the CDC's International Chemical Safety Card.\*

An oven-dried 8 mL vial equipped with a stir bar and septa cap was charged with the phosphonium salt (1.0 equiv), sodium azide (1.25 equiv), and placed under a nitrogen atmosphere. DMSO (1.5 M) was added, the cap was wrapped with parafilm and the reaction mixture was heated for the stated time at 120 °C. The reaction was cooled to room temperature, diluted with EtOAc and a saturated aqueous solution of NaHCO<sub>3</sub>. The aqueous layer was extracted a further three times with EtOAc and the combined organic extracts were dried (MgSO<sub>4</sub>), filtered, and concentrated *in vacuo*. The residue was purified by flash chromatography under the stated conditions to provide the iminophosphorane product.

\* Center for Disease Control and Prevention: Sodium Azide International Chemical Safety Card. <https://www.cdc.gov/niosh/ipcsneng/neng0950.html> (accessed Apr 4, 2018).

### 1,1,1-triphenyl-N-(5,6,7,8-tetrahydroquinolin-4-yl)- $\lambda^5$ -phosphanimine (2a)

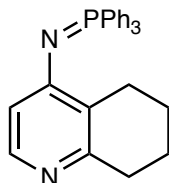

Prepared according to general procedure B using triphenyl(5,6,7,8-tetrahydroquinolin-4-yl)phosphonium trifluoromethanesulfonate (272 mg, 0.50 mmol), sodium azide (41 mg, 0.63 mmol) and DMSO (0.33 mL) for 23 h. Flash column chromatography (basic alumina: 50% EtOAc in Hexanes) afforded the title compound as a light brown crystalline solid (174 mg, 0.43 mmol, 85% yield). mp 77-80 °C; IR  $\nu_{\max}/\text{cm}^{-1}$  (film): 3084, 3051, 2989, 2954, 1442, 1439, 1270, 1260, 1221, 1145, 1106, 1029, 758, 723;  $^1\text{H}$  NMR (400 MHz,  $\text{CDCl}_3$ )  $\delta$ : 7.79 (1H, d,  $J = 6.5$  Hz), 7.74-7.59 (9H, m), 7.53 (6H, td,  $J = 7.7, 3.2$  Hz), 6.02 (1H, d,  $J = 6.5$  Hz), 2.98-2.84 (4H, m), 1.91-1.80 (4H, m);  $^{13}\text{C}$  NMR (100 MHz,  $\text{CDCl}_3$ )  $\delta$ : 158.54, 154.56, 143.78, 132.46 (d,  $J = 9.9$  Hz), 132.21 (d,  $J = 2.9$  Hz), 129.87 (d,  $J = 100.3$  Hz), 128.86 (d,  $J = 12.2$  Hz), 127.44 (d,  $J = 23.6$  Hz), 113.09 (d,  $J = 11.2$  Hz), 31.69, 24.94, 23.01, 22.91;  $^{31}\text{P}$  NMR (162 MHz,  $\text{CDCl}_3$ )  $\delta$ : 6.85;  $m/z$  LRMS (ESI + APCI) found  $[\text{M}+\text{H}]^+$  409.4,  $\text{C}_{27}\text{H}_{26}\text{N}_2\text{P}^+$  requires 409.2.

### N-(2-butyl-5-(trifluoromethyl)pyridin-4-yl)-1,1,1-triphenyl- $\lambda^5$ -phosphanimine (2b)

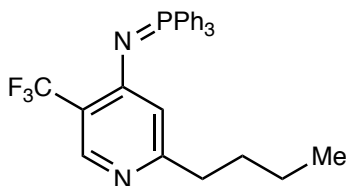

Prepared according to general procedure B using (2-butyl-5-(trifluoromethyl)pyridin-4-yl)triphenylphosphonium trifluoromethanesulfonate (307 mg, 0.50 mmol), sodium azide (41 mg, 0.63 mmol) and DMSO (0.33 mL) for 21.25 h. Flash column chromatography (basic alumina: 30% EtOAc in hexanes) afforded the title compound as a white solid (214 mg, 0.45 mmol, 89% yield). mp 145-147 °C; IR  $\nu_{\max}/\text{cm}^{-1}$  (film): 3075, 2963, 2927, 1592, 1520, 1491, 1484, 1442, 1434, 1324, 1200, 1182, 1108, 1057, 1024, 718, 693;  $^1\text{H}$  NMR (400 MHz,  $\text{CDCl}_3$ )  $\delta$ : 8.42 (1H, d,  $J = 2.4$  Hz), 7.77 (6H, dd,  $J = 8.2, 7.2$



Hz), 7.58 (3H, td,  $J = 7.7, 1.6$  Hz), 7.49 (6H, td,  $J = 7.7, 3.0$  Hz), 6.03 (1H, s), 2.37 (2H, t,  $J = 7.5$  Hz), 1.33 (2H, pent,  $J = 7.5$  Hz), 1.11 (2H, pent,  $J = 7.6$  Hz), 0.77 (3H, t,  $J = 7.3$  Hz);  $^{13}\text{C}$  NMR (100 MHz,  $\text{CDCl}_3$ )  $\delta$ : 164.45, 157.38, 147.18 (qd,  $J = 6.0, 2.5$  Hz), 132.44 (d,  $J = 10.0$  Hz), 132.21 (d,  $J = 2.9$  Hz), 129.38 (d,  $J = 101.7$  Hz), 128.81 (d,  $J = 12.3$  Hz), 125.35 (q,  $J = 272.3$  Hz), 118.45-117.19 (m), 115.05 (d,  $J = 11.8$  Hz), 37.56, 31.18, 21.97, 13.79;  $^{19}\text{F}$  NMR (365 MHz,  $\text{CDCl}_3$ )  $\delta$ : -62.27;  $^{31}\text{P}$  NMR (162 MHz,  $\text{CDCl}_3$ )  $\delta$ : 6.25;  $m/z$  LRMS (ESI + APCI) found  $[\text{M}+\text{H}]^+$  479.3,  $\text{C}_{28}\text{H}_{27}\text{F}_3\text{N}_2\text{P}^+$  requires 479.2.

**N-(2-(methylthio)-5-(trifluoromethyl)pyridin-4-yl)-1,1,1-triphenyl- $\lambda^5$ -phosphanimine (2c)**

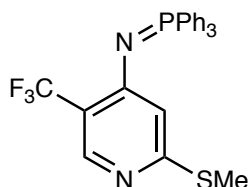

Prepared according to general procedure B using (2-(methylthio)-5-(trifluoromethyl)pyridin-4-yl)triphenylphosphonium trifluoromethanesulfonate (301 mg, 0.50 mmol), sodium azide (41 mg, 0.63 mmol) and DMSO (0.33 mL) for 6 h. Flash column chromatography (silica gel: 30% EtOAc in hexanes) afforded the title compound as a white solid (219 mg, 0.47 mmol, 93% yield). mp 172-174 °C; IR  $\nu_{\text{max}}/\text{cm}^{-1}$  (film): 2989, 2901, 1578, 1569, 1516, 1468, 1434, 1418, 1326, 1103, 1058, 1019, 720;  $^1\text{H}$  NMR (400 MHz,  $\text{CDCl}_3$ )  $\delta$ : 8.34 (1H, d,  $J = 2.5$  Hz), 7.80-7.72 (6H, m), 7.59 (3H, tdd,  $J = 6.7, 1.7, 1.4$  Hz), 7.54-7.47 (6H, m), 5.99 (1H, s), 2.15 (3H, s);  $^{13}\text{C}$  NMR (100 MHz,  $\text{CDCl}_3$ )  $\delta$ : 162.87, 156.89, 147.19 (qd,  $J = 6.2, 2.5$  Hz), 132.47 (d,  $J = 10.1$  Hz), 132.38 (d,  $J = 3.0$  Hz), 129.21 (d,  $J = 101.3$  Hz), 128.94 (d,  $J = 12.4$  Hz), 125.25 (q,  $J = 272.2$  Hz), 117.11 (qd,  $J = 27.4, 23.2$  Hz), 111.68 (d,  $J = 12.0$  Hz), 13.29;  $^{19}\text{F}$  NMR (365 MHz,  $\text{CDCl}_3$ )  $\delta$ : -62.23;  $^{31}\text{P}$  NMR (162 MHz,  $\text{CDCl}_3$ )  $\delta$ : 6.45;  $m/z$  LRMS (ESI + APCI) found  $[\text{M}+\text{H}]^+$  469.2,  $\text{C}_{25}\text{H}_{21}\text{F}_3\text{N}_2\text{PS}^+$  requires 469.1.

**N-(2-(methylthio)-5-(trifluoromethyl)pyridin-4-yl)-1,1,1-triphenyl- $\lambda^5$ -phosphanimine (2c) (Large Scale Procedure)**

An oven-dried 8 mL vial equipped with a stir bar and septa cap was charged with (2-(methylthio)-5-(trifluoromethyl)pyridin-4-yl)triphenylphosphonium trifluoromethanesulfonate (603 mg, 1.00 mmol), sodium azide (81 mg, 1.25 mmol), and placed under a nitrogen atmosphere. DMSO (1.5 M) was added, the cap was wrapped with parafilm and the reaction mixture was heated for 15 h at 120 °C. The reaction was cooled to room temperature, diluted with EtOAc and a saturated aqueous solution of NaHCO<sub>3</sub>. The aqueous layer was extracted a further three times with EtOAc and the combined organic extracts were dried (MgSO<sub>4</sub>), filtered, and concentrated *in vacuo*. The residue was purified by flash chromatography (silica gel: 30% EtOAc in hexanes) which afforded the title compound as a white solid (421 mg, 0.90 mmol, 90% yield).

**6-(4-methoxyphenoxy)-4-((triphenyl- $\lambda^5$ -phosphaneylidene)amino)nicotinonitrile (2d)**

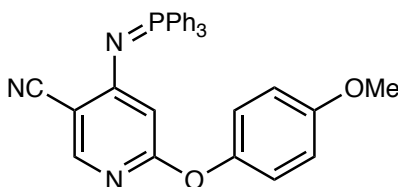

Prepared according to general procedure B using (5-cyano-2-(4-methoxyphenoxy)pyridin-4-yl)triphenylphosphonium (318 mg, 0.50 mmol), sodium azide (41 mg, 0.625 mmol) and DMSO (0.33 mL) for 8 h. Flash column chromatography (silica gel: 50% EtOAc in hexanes) afforded the title compound as a yellow solid (112 mg, 0.22 mmol, 45% yield). mp 212-214 °C; IR  $\nu_{\max}/\text{cm}^{-1}$  (film): 2989, 2214, 1582, 1502, 1471, 1418, 1206, 1176, 1105, 1033; <sup>1</sup>H NMR (400 MHz, CDCl<sub>3</sub>)  $\delta$ : 8.20 (1H, d,  $J$  = 2.6 Hz), 7.74-7.67 (6H, m), 7.59 (3H, tdd,  $J$  = 7.3, 2.0, 1.9 Hz), 7.52-7.44 (6H, m), 6.85-6.80 (2H, m), 6.79-6.74 (2H, m), 5.55 (1H, s), 3.79 (3H, s); <sup>13</sup>C NMR (100 MHz, CDCl<sub>3</sub>)  $\delta$ : 167.02, 163.28, 156.51, 153.08 (d,  $J$  = 2.4 Hz), 146.82, 132.56, 132.54 (d,  $J$  = 10.0 Hz), 129.00 (d,  $J$  = 12.4 Hz), 128.07 (d,  $J$  = 101.1 Hz), 122.26, 118.63, 114.56, 102.15, (d,  $J$  = 26.4 Hz), 99.39 (d,  $J$  = 11.9 Hz), 55.54; <sup>31</sup>P NMR (162 MHz, CDCl<sub>3</sub>)  $\delta$ : 9.18;  $m/z$  LRMS (ESI + APCI) found [M+H]<sup>+</sup> 502.3, C<sub>31</sub>H<sub>25</sub>N<sub>3</sub>O<sub>2</sub>P<sup>+</sup> requires 502.2.

### 5-(3-fluorophenyl)-4-((triphenyl- $\lambda^5$ -phosphaneylidene)amino)nicotinonitrile (2e)

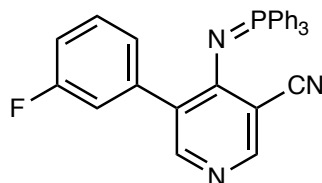

Prepared according to general procedure B using (3-cyano-5-(3-fluorophenyl)pyridin-4-yl)triphenylphosphonium trifluoromethanesulfonate (304 mg, 0.50 mmol), sodium azide (41 mg, 0.63 mmol) and DMSO (0.33 mL) for 23.75 h. Flash column chromatography (basic alumina: 20% EtOAc in hexanes) afforded the title compound as a yellow amorphous solid (208 mg, 0.44 mmol, 88% yield). mp 43-45 °C; IR  $\nu_{\max}/\text{cm}^{-1}$  (film): 3058, 3012, 2919, 2220, 1614, 1582, 1565, 1468, 1434, 1254, 1198, 1149, 1109, 1043, 908, 716;  $^1\text{H}$  NMR (400 MHz,  $\text{CDCl}_3$ )  $\delta$ : 8.37 (1H, s), 8.22 (1H, d,  $J = 1.7$  Hz), 7.55-7.34 (9H, m), 7.39 (6H, td,  $J = 7.7, 3.4$  Hz), 7.21 (1H, m), 7.08 (1H, d,  $J = 7.6$  Hz), 6.97 (2H, m);  $^{13}\text{C}$  NMR (100 MHz,  $\text{CDCl}_3$ )  $\delta$ : 162.34 (d,  $J = 245.8$  Hz), 157.63 (d,  $J = 2.2$  Hz), 154.08 (d,  $J = 0.9$  Hz), 151.84, 139.90 (d,  $J = 8.1$  Hz), 133.05 (d,  $J = 12.0$  Hz), 132.40 (d,  $J = 10.55$  Hz), 132.02 (d,  $J = 3.0$  Hz), 130.08 (d,  $J = 105.3$  Hz), 129.44 (d,  $J = 8.4$  Hz), 128.55 (d,  $J = 12.7$  Hz), 125.53 (d,  $J = 2.9$  Hz), 119.1 (d,  $J = 1.0$  Hz), 116.95 (d,  $J = 21.6$  Hz), 113.94 (d,  $J = 21.0$  Hz), 105.22 (d,  $J = 7.0$  Hz);  $^{19}\text{F}$  NMR (365 MHz,  $\text{CDCl}_3$ )  $\delta$ : -113.76;  $^{31}\text{P}$  NMR (162 MHz,  $\text{CDCl}_3$ )  $\delta$ : 4.88;  $m/z$  LRMS (ESI + APCI) found  $[\text{M}+\text{H}]^+$  474.3,  $\text{C}_{30}\text{H}_{22}\text{FN}_3\text{P}^+$  requires 474.2.

### 5-(thiophen-3-yl)-4-((triphenyl- $\lambda^5$ -phosphaneylidene) amino)nicotinonitrile (2f)

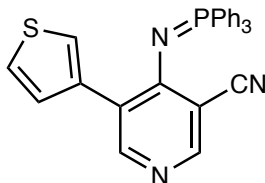

Prepared according to general procedure B using (3-cyano-5-(thiophen-3-yl)pyridin-4-yl)triphenylphosphonium trifluoromethanesulfonate (298 mg, 0.50 mmol), sodium azide (41 mg, 0.63 mmol) and DMSO (0.33 mL) for 21 h. Flash column chromatography (basic alumina: 50% EtOAc in hexanes) afforded the title compound as a yellow oil (164 mg, 0.35 mmol, 71% yield). IR  $\nu_{\max}/\text{cm}^{-1}$  (film): 3058, 3011, 2218, 1566, 1464, 1435, 1372, 1245, 1152, 1108, 1043, 1025, 748, 690;  $^1\text{H}$  NMR (400 MHz,  $\text{CDCl}_3$ )  $\delta$ : 8.34, (1H, d,  $J = 1.8$  Hz), 8.32 (1H, s), 7.58-7.48 (9H, m), 7.42 (6H, td,  $J = 7.5$ , 3.3 Hz), 7.25 (1H, dd,  $J = 3.0$ , 1.7 Hz), 7.22 (1H, dd,  $J = 5.0$ , 3.0 Hz), 7.17 (1H, dd,  $J = 5.0$ , 1.3 Hz);  $^{13}\text{C}$  NMR (100 MHz,  $\text{CDCl}_3$ )  $\delta$ : 157.61 (d,  $J = 1.8$  Hz), 153.67 (d,  $J = 1.0$  Hz), 151.83, 137.77, 132.51 (d,  $J = 10.6$  Hz), 132.03 (d,  $J = 2.9$  Hz), 130.31 (d,  $J = 105.2$  Hz), 129.42, 129.31, 128.56 (d,  $J = 12.8$  Hz), 124.53, 123.73, 119.28 (d,  $J = 0.8$  Hz), 104.76 (d,  $J = 5.9$  Hz);  $^{31}\text{P}$  NMR (162 MHz,  $\text{CDCl}_3$ )  $\delta$ : 5.00;  $m/z$  LRMS (ESI + APCI) found  $[\text{M}+\text{H}]^+$  462.2,  $\text{C}_{28}\text{H}_{21}\text{N}_3\text{PS}^+$  requires 462.1.

### 1,1,1-triphenyl-N-(4-(trifluoromethyl)pyridin-2-yl)- $\lambda^5$ -phosphanimine (2g)

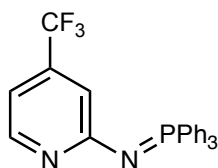

Prepared according to general procedure B using triphenyl(4-(trifluoromethyl)pyridin-2-yl)phosphonium trifluoromethanesulfonate (279 mg, 0.50 mmol), sodium azide (41 mg, 0.63 mmol) and DMSO (0.33 mL) for 25 h. Flash column chromatography (silica gel: 20% EtOAc in hexanes) afforded the title compound as a pale yellow solid (186 mg, 0.44 mmol, 88% yield). mp 159-160 °C; IR  $\nu_{\max}/\text{cm}^{-1}$  (film): 3055, 2995, 1595, 1546, 1469, 1422, 1335, 1305, 1271, 1162, 1128, 1111, 1073, 1034, 1022, 998, 720,

690;  $^1\text{H}$  NMR (400 MHz,  $\text{CDCl}_3$ )  $\delta$ : 7.89, (1H, d,  $J = 5.4$  Hz), 7.81 (6H, m), 7.52 (3H, td,  $J = 7.5, 1.4$  Hz), 7.13 (1H, s), 7.44 (6H, td,  $J = 7.8, 2.9$  Hz), 6.60 (1H, d,  $J = 5.5$  Hz);  $^{13}\text{C}$  NMR (100 MHz,  $\text{CDCl}_3$ )  $\delta$ : 164.25 (d,  $J = 6.3$  Hz), 147.97, 138.73 (qd,  $J = 32.7, 5.3$  Hz), 133.08 (d,  $J = 9.7$  Hz), 131.69 (d,  $J = 2.9$  Hz), 129.61 (d,  $J = 100.1$  Hz), 128.7 (d,  $J = 12.2$  Hz), 123.52 (qd,  $J = 272.9, 1.5$  Hz), 113.42 (dq,  $J = 26.0, 4.0$  Hz), 107.10 (q,  $J = 3.4$  Hz);  $^{19}\text{F}$  NMR (365 MHz,  $\text{CDCl}_3$ )  $\delta$ : -65.10;  $^{31}\text{P}$  NMR (162 MHz,  $\text{CDCl}_3$ )  $\delta$ : 14.85;  $m/z$  LRMS (ESI + APCI) found  $[\text{M}+\text{H}]^+$  423.3  $\text{C}_{24}\text{H}_{19}\text{F}_3\text{N}_2\text{P}^+$  requires 423.1.

### N-(4-methylquinolin-2-yl)-1,1,1-triphenyl- $\lambda^5$ -phosphanimine (2h)

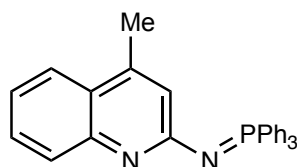

Prepared according to general procedure B using (4-methylquinolin-2-yl)triphenylphosphonium trifluoromethanesulfonate (277 mg, 0.50 mmol), sodium azide (41 mg, 0.63 mmol) and DMSO (0.33 mL) for 22.67 h. Flash column chromatography (basic alumina: 25% EtOAc in hexanes) afforded the title compound as a yellow solid (277 mg, 0.33 mmol, 66% yield). mp 193-195 °C; IR  $\nu_{\text{max}}$ /cm $^{-1}$  (film): 3077, 3046, 2989, 1602, 1541, 1456, 1438, 1386, 1355, 1321, 1308, 1243, 1206, 1188, 1108, 1073, 1058, 914, 854, 718;  $^1\text{H}$  NMR (400 MHz,  $\text{CDCl}_3$ )  $\delta$ : 7.95-7.85 (6H, m), 7.70 (1H, d,  $J = 8.2$  Hz), 7.53-7.46 (3H, m), 7.41 (6H, td,  $J = 7.7, 2.9$  Hz), 7.36-7.24 (2H, m), 7.11 (1H, ddd,  $J = 8.1, 6.7, 1.5$  Hz), 7.05 (1H, s), 2.52 (3H, s);  $^{13}\text{C}$  NMR (100 MHz,  $\text{CDCl}_3$ )  $\delta$ : 162.64 (d,  $J = 6.8$  Hz), 147.96, 143.38 (d,  $J = 4.8$  Hz), 133.29 (d,  $J = 9.5$  Hz), 131.40 (d,  $J = 2.8$  Hz), 130.12 (d,  $J = 99.3$  Hz), 128.17 (d,  $J = 12.1$  Hz), 127.85, 126.13, 123.68, 123.25, 120.87, 120.55 (d,  $J = 25.1$  Hz), 18.42 (d,  $J = 0.7$  Hz);  $^{31}\text{P}$  NMR (162 MHz,  $\text{CDCl}_3$ )  $\delta$ : 15.97;  $m/z$  LRMS (ESI + APCI) found  $[\text{M}+\text{H}]^+$  419.3,  $\text{C}_{28}\text{H}_{24}\text{N}_2\text{P}^+$  requires 419.2.

### 1,1,1-triphenyl-N-(pyrazin-2-yl)- $\lambda^5$ -phosphanimine (2i)

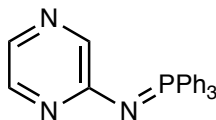

Prepared according to general procedure B using triphenyl(pyrazin-2-yl)phosphonium trifluoromethanesulfonate (245 mg, 0.50 mmol), sodium azide (41 mg, 0.63 mmol) and DMSO (0.33 mL) for 21.5 h. Flash column chromatography (silica gel: 30% EtOAc in hexanes) afforded the title compound as a brown solid (98 mg, 0.28 mmol, 55% yield). mp 174-176 °C; IR  $\nu_{\max}$ /cm<sup>-1</sup> (film): 3061, 1573, 1492, 1471, 1435, 1410, 1344, 1109, 996, 718, 691; <sup>1</sup>H NMR (400 MHz, CDCl<sub>3</sub>)  $\delta$ : 8.29 (1H, s), 7.80 (6H, dd,  $J$  = 8.3, 7.2 Hz), 7.70-7.64 (2H, m), 7.53 (3H, td,  $J$  = 7.8, 1.6 Hz), 7.44 (6H, td,  $J$  = 7.6, 2.9 Hz); <sup>13</sup>C NMR (100 MHz, CDCl<sub>3</sub>)  $\delta$ : 160.19 (d,  $J$  = 6.4 Hz), 141.89 (d,  $J$  = 25.8 Hz), 140.99, 131.82 (d,  $J$  = 2.9 Hz), 133.02 (d,  $J$  = 9.8 Hz), 131.82 (d,  $J$  = 2.9 Hz), 129.34 (d,  $J$  = 100.1 Hz), 128.44 (d,  $J$  = 12.2 Hz); <sup>31</sup>P NMR (162 MHz, CDCl<sub>3</sub>)  $\delta$ : 15.85;  $m/z$  LRMS (ESI + APCI) found [M+H]<sup>+</sup> 356.2, C<sub>22</sub>H<sub>19</sub>N<sub>3</sub>P<sup>+</sup> requires 356.1.

### 1,1,1-triphenyl-N-(quinoxalin-2-yl)- $\lambda^5$ -phosphanimine (2j)

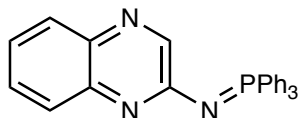

Prepared according to general procedure B using triphenyl(quinoxalin-2-yl)phosphonium (270 mg, 0.50 mmol), sodium azide (41 mg, 0.63 mmol) and DMSO (0.33 mL) for 22.5 h. Flash column chromatography (basic alumina: 30% EtOAc in hexanes) afforded the title compound as a yellow solid (172 mg, 0.42 mmol, 85% yield). mp 125-128 °C; IR  $\nu_{\max}$ /cm<sup>-1</sup> (film): 3061, 2989, 1534, 1437, 1432, 1407, 1375, 1352, 1305, 1237, 1106, 1033, 1023, 1011, 946, 904, 728, 720.3, 687; <sup>1</sup>H NMR (400 MHz, CDCl<sub>3</sub>)  $\delta$ : 8.63 (1H, s), 7.93-7.85 (6H, m), 7.80 (1H, dd,  $J$  = 8.1, 1.4 Hz), 7.54 (3H, tdd,  $J$  = 6.7, 1.7, 1.4 Hz), 7.49-7.42 (6H, m), 7.37 (1H, ddd,  $J$  = 8.3, 6.8, 1.4 Hz), 7.31-7.22 (2H, m); <sup>13</sup>C NMR (100 MHz, CDCl<sub>3</sub>)  $\delta$ : 158.17 (d,  $J$  = 6.7 Hz), 147.00 (d,  $J$  = 26.8 Hz), 142.21, 136.82, 133.21 (d,  $J$  = 9.8 Hz),

131.41 (d,  $J = 2.9$  Hz), 129.34-128.22 (4C, m), 125.80, 123.30;  $^{31}\text{P}$  NMR (162 MHz,  $\text{CDCl}_3$ )  $\delta$ : 17.83;  $m/z$  LRMS (ESI + APCI) found  $[\text{M}+\text{H}]^+$  406.2,  $\text{C}_{26}\text{H}_{21}\text{N}_3\text{P}^+$  requires 406.2.

**N-(5-(4-methoxyphenyl)pyrimidin-4-yl)-1,1,1-triphenyl- $\lambda^5$ -phosphanimine (2k)**

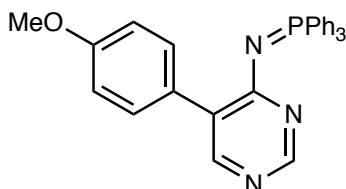

Prepared according to general procedure B using 5-(4-methoxyphenyl)pyrimidin-4-yl)triphenylphosphonium trifluoromethanesulfonate (298 mg, 0.50 mmol), sodium azide (41 mg, 0.63 mmol) and DMSO (0.33 mL) for 21.75 h. Flash column chromatography (basic alumina: 75% EtOAc in hexanes) afforded the title compound as a yellow solid (201 mg, 0.43 mmol, 87% yield). mp 139-141 °C; IR  $\nu_{\text{max}}/\text{cm}^{-1}$  (film): 3058, 2989, 1578, 1567, 1517, 1506, 1451, 1432, 1411, 1391, 1354, 1293, 1239, 1176, 1116, 1108, 1101, 1028, 1018, 824, 717;  $^1\text{H}$  NMR (400 MHz,  $\text{CDCl}_3$ )  $\delta$ : 8.22-8.18 (2H, m), 7.88-7.76 (8H, m), 7.52 (3H, td,  $J = 7.7, 1.5$  Hz), 7.43 (6H, td,  $J = 7.7, 2.9$  Hz), 7.01 (2H, d,  $J = 8.6$  Hz), 3.59 (3H, s);  $^{13}\text{C}$  NMR (100 MHz,  $\text{CDCl}_3$ )  $\delta$ : 165.22 (d,  $J = 6.7$  Hz), 158.59, 155.84, 153.10 (d,  $J = 3.0$  Hz), 133.04 (d,  $J = 9.8$  Hz), 131.67 (d,  $J = 2.8$  Hz), 130.38, 129.65, 129.07 (d,  $J = 100.4$  Hz), 128.22 (d,  $J = 12.2$  Hz), 125.47 (d,  $J = 22.0$  Hz), 113.11, 55.12;  $^{31}\text{P}$  NMR (162 MHz,  $\text{CDCl}_3$ )  $\delta$ : 16.78;  $m/z$  LRMS (ESI + APCI) found  $[\text{M}+\text{H}]^+$  462.3,  $\text{C}_{29}\text{H}_{25}\text{N}_3\text{OP}^+$  requires 462.2.

**N-(5-bromo-2-(methylthio)pyrimidin-4-yl)-1,1,1-triphenyl- $\lambda^5$ -phosphanimine (2l)**

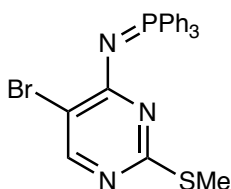

Prepared according to general procedure B using (5-bromo-2-(methylthio)pyrimidin-4-yl)triphenylphosphonium trifluoromethanesulfonate (308 mg, 0.50 mmol), sodium azide (41 mg, 0.63

mmol) and DMSO (0.33 mL) for 18 h. Flash column chromatography (basic alumina: 30% EtOAc in hexanes) afforded the title compound as a white solid (235 mg, 0.49 mmol, 98% yield). mp 176-178 °C; IR  $\nu_{\max}/\text{cm}^{-1}$  (film): 3061, 2989, 1541, 1495, 1482, 1426, 1350, 1316, 1301, 1174, 1109, 1061, 1028, 1005;  $^1\text{H}$  NMR (400 MHz,  $\text{CDCl}_3$ )  $\delta$ : 8.16 (1H, d,  $J = 2.9$  Hz), 7.82-7.74 (6H, m), 7.57 (3H, tdd,  $J = 7.2, 1.6, 1.4$  Hz), 7.51-7.44 (6H, m), 1.86 (3H, s);  $^{13}\text{C}$  NMR (100 MHz,  $\text{CDCl}_3$ )  $\delta$ : 168.16, (d,  $J = 0.5$  Hz), 163.96, (d,  $J = 4.6$  Hz), 155.57 (d,  $J = 2.6$  Hz), 132.88 (d,  $J = 10.0$  Hz), 132.17 (d,  $J = 2.9$  Hz), 128.54 (d,  $J = 12.4$  Hz), 128.38 (d,  $J = 101.2$  Hz), 109.14 (d,  $J = 26.2$  Hz), 13.50;  $m/z$  LRMS (ESI + APCI) found  $[\text{M}+\text{H}]^+$  480.1,  $\text{C}_{23}\text{H}_{20}\text{BrN}_3\text{PS}^+$  requires 480.0.

**N-(7-methyl-7H-pyrrolo[2,3-d]pyrimidin-4-yl)-1,1,1-triphenyl- $\lambda^5$ -phosphanimine (2m)**

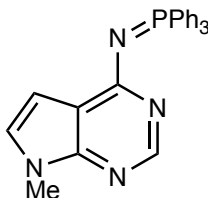

Prepared according to general procedure B using (7-methyl-7H-pyrrolo[2,3-d]pyrimidin-4-yl)triphenylphosphonium trifluoromethanesulfonate (272 mg, 0.50 mmol), sodium azide (41 mg, 0.63 mmol) and DMSO (0.33 mL) for 8 h. Flash column chromatography (basic alumina: 50% EtOAc in hexanes) afforded the title compound as a yellow solid (108 mg, 0.26 mmol, 53% yield). mp 236-238 °C; IR  $\nu_{\max}/\text{cm}^{-1}$  (film): 3051, 2919, 2850, 1567, 1555, 1482, 1443, 1431, 1375, 1334, 1293, 1245, 1107, 1063, 715;  $^1\text{H}$  NMR (400 MHz,  $\text{CDCl}_3$ )  $\delta$ : 8.08 (1H, s), 7.92-7.84 (6H, m), 7.52 (3H, tdd,  $J = 7.6, 1.6, 1.4$  Hz), 7.47-7.40 (6H, m), 6.86 (1H, d,  $J = 3.4$  Hz), 6.75 (1H, d,  $J = 3.4$  Hz), 3.76 (3H, s);  $^{13}\text{C}$  NMR (100 MHz,  $\text{CDCl}_3$ )  $\delta$ : 162.46 (d,  $J = 6.9$  Hz), 151.14, 150.62 (d,  $J = 5.3$  Hz), 133.42 (d,  $J = 9.8$  Hz), 131.68 (d,  $J = 2.9$  Hz), 129.65 (d,  $J = 100.0$  Hz), 128.29 (d,  $J = 12.2$  Hz), 123.90, 111.16 (d,  $J = 25.2$  Hz), 99.94, 31.08;  $^{31}\text{P}$  NMR (162 MHz,  $\text{CDCl}_3$ )  $\delta$ : 16.13;  $m/z$  LRMS (ESI + APCI) found  $[\text{M}+\text{H}]^+$  409.3,  $\text{C}_{25}\text{H}_{22}\text{N}_4\text{P}^+$  requires 409.2.



***N*-2-(bis(3-(trifluoromethyl)phenyl)methyl)-5-methylpyridin-4-yl)-1,1,1-triphenyl- $\lambda^5$ -phosphanimine (2n)**

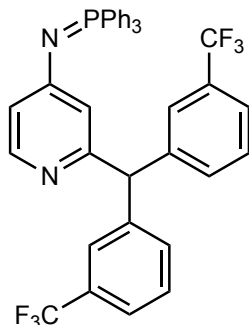

Prepared according to general procedure B (except the reaction was diluted and extracted with CH<sub>2</sub>Cl<sub>2</sub> instead of EtOAc during the workup) using (2-(bis(3-(trifluoromethyl)phenyl)methyl)pyridin-4-yl)triphenylphosphonium trifluoromethanesulfonate (198 mg, 0.25 mmol), sodium azide (20 mg, 0.31 mmol) and DMSO (0.17 mL) for 17 h. Flash column chromatography (silica gel was packed in hexanes and neutralized with NEt<sub>3</sub> then: 40% EtOAc, 1% NEt<sub>3</sub> in hexanes to 60% EtOAc, 1% NEt<sub>3</sub> in hexanes) afforded the title compound as a white solid (122 mg, 0.19 mmol, 74% yield). mp 44-46 °C; IR  $\nu_{\max}/\text{cm}^{-1}$  (film): 3058, 2989, 1582, 1477, 1438, 1352, 1327, 1157, 1115, 1074, 1049, 717; <sup>1</sup>H NMR (400 MHz, CDCl<sub>3</sub>)  $\delta$ : 8.00 (1H, d,  $J$  = 5.5 Hz), 7.58-7.48 (6H, m), 7.47-7.39 (3H, m), 7.39-7.26 (8H, m), 7.24-7.14 (4H, m), 7.10-7.00 (2H, m), 6.52 (1H, dd,  $J$  = 5.5, 1.8 Hz), 6.11 (1H, s), 5.45 (1H, s); <sup>13</sup>C NMR (100 MHz, CDCl<sub>3</sub>)  $\delta$ : 160.55 (d,  $J$  = 1.5 Hz), 159.53 (d,  $J$  = 2.5 Hz), 149.62 (d,  $J$  = 2.2 Hz), 143.32, 132.67, (d,  $J$  = 0.9 Hz), 132.37 (d,  $J$  = 9.8 Hz), 132.17 (d,  $J$  = 2.8 Hz), 130.49 (q,  $J$  = 32.0 Hz), 129.06 (d,  $J$  = 99.4 Hz), 128.78 (d,  $J$  = 12.1 Hz), 128.67, 125.82 (q,  $J$  = 3.8 Hz), 124.06 (q,  $J$  = 272.4, Hz), 123.32 (q,  $J$  = 3.8 Hz), 118.41 (d,  $J$  = 18.1 Hz), 117.66 (d,  $J$  = 21.0 Hz), 58.75; <sup>19</sup>F NMR (365 MHz, CDCl<sub>3</sub>)  $\delta$ : -62.41; <sup>31</sup>P NMR (162 MHz, CDCl<sub>3</sub>)  $\delta$ : 8.97;  $m/z$  LRMS (ESI + APCI) found [M+H]<sup>+</sup> 657.3, C<sub>38</sub>H<sub>28</sub>F<sub>6</sub>N<sub>2</sub>P<sup>+</sup> requires 657.2.

**Ethyl 4-((4-chlorophenyl)(4-((triphenyl- $\lambda^5$ -phosphaneylidene)amino)pyridin-2-yl)methoxy)piperidine-1-carboxylate (2o)**

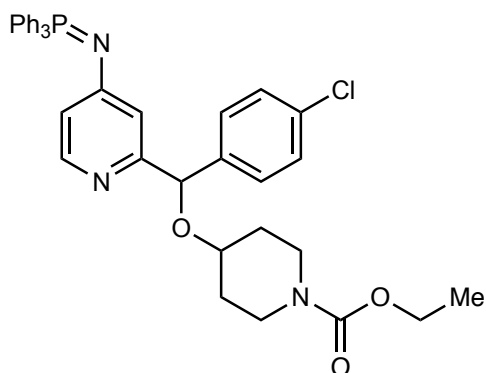

Prepared according to general procedure B using (2-((4-chlorophenyl)((1-(ethoxycarbonyl)piperidin-4-yl)oxy)methyl)pyridin-4-yl) triphenylphosphonium trifluoromethanesulfonate (196 mg, 0.25 mmol), sodium azide (20 mg, 0.31 mmol) and DMSO (0.17 mL) for 24.75 h. Flash column chromatography (silica gel, gradient elution: 2% MeOH in CH<sub>2</sub>Cl<sub>2</sub> to 4% MeOH in CH<sub>2</sub>Cl<sub>2</sub>) afforded the title compound as a light yellow oil (110 mg, 0.17 mmol, 68% yield). IR  $\nu_{\max}/\text{cm}^{-1}$  (film): 3057, 2928, 1692, 1585, 1477, 1437, 1354, 1230, 1108, 1088, 1028, 752, 720; <sup>1</sup>H NMR (400 MHz, CDCl<sub>3</sub>)  $\delta$ : 7.96 (1H, d, *J* = 5.7 Hz), 7.73-7.64 (6H, m), 7.62-7.55 (3H, m), 7.52-7.43 (6H, m), 7.20-7.14 (4H, m), 6.68 (1H, d, *J* = 1.8 Hz), 6.60 (1H, dd, *J* = 5.8, 1.9 Hz), 5.46 (1H, s), 4.11 (2H, q, *J* = 7.1 Hz), 3.64-3.47 (3H, m), 3.21-3.04 (2H, m), 1.78-1.67 (1H, m), 1.61-1.35 (3H, m), 1.24 (3H, t, *J* = 7.1 Hz); <sup>13</sup>C NMR (100 MHz, CDCl<sub>3</sub>)  $\delta$ : 161.11, 159.51, 155.42, 146.62, 140.10, 132.98, 132.57-132.30 (2C, m), 128.93 (d, *J* = 12.2 Hz), 128.76 (d, *J* = 99.6 Hz), 128.27, 128.07, 118.42 (d, *J* = 22.15), 114.54 (d, *J* = 18.4 Hz), 79.76, 72.12, 61.13, 40.87, 40.83 (rot), 30.89 (rot), 30.80, 14.66; *m/z* LRMS (ESI + APCI) found [M+H]<sup>+</sup> 650.3, C<sub>38</sub>H<sub>38</sub>ClN<sub>3</sub>O<sub>3</sub>P<sup>+</sup> requires 650.2.

**Tert-butyl**

**(R)-2-(((4-((triphenyl- $\lambda^5$ -phosphaneylidene)amino)pyrimidin-2-yl)oxy)methyl)pyrrolidine-1-carboxylate (2p)**

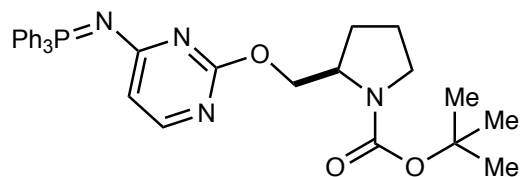

Prepared according to general procedure B (except the reaction was diluted and extracted with  $\text{CH}_2\text{Cl}_2$  instead of EtOAc during the workup) using triphenyl(5,6,7,8-tetrahydroquinolin-4-yl)phosphonium trifluoromethanesulfonate (172 mg, 0.25 mmol), sodium azide (20 mg, 0.31 mmol) and DMSO (0.17 mL) for 12 h. Flash column chromatography (silica gel, gradient elution: 1% MeOH in  $\text{CH}_2\text{Cl}_2$  to 2.5% MeOH in  $\text{CH}_2\text{Cl}_2$ ) afforded the title compound as an off white solid (125 mg, 0.23 mmol, 90% yield). mp 156-159 °C; IR  $\nu_{\text{max}}/\text{cm}^{-1}$  (film): 3052, 2997, 2980, 1681, 1578, 1571, 15.27, 1456, 1446, 1440, 1435, 1400, 1360, 1344, 1330, 1282, 1111, 1036, 942, 717;  $^1\text{H}$  NMR (400 MHz,  $\text{CDCl}_3$ )  $\delta$ : 7.96-7.84 (1H, m), 7.77-7.59 (6H, m), 7.56-7.46 (3H, m), 7.45-7.34 (6H, m), 6.52-6.39 (1H, m), 3.92-3.79 (1H, m), 3.74-3.45 (1H, m), 3.39-2.80 (3H, m), 1.83-1.25 (13H, m);  $^{13}\text{C}$  NMR (100 MHz,  $\text{CDCl}_3$ )  $\delta$ : 170.25 (rot), 170.17, 163.97, 156.53, 156.29 (rot), 154.15, 133.08-132.40 (m), 131.84 (d,  $J = 2.6$  Hz), 129.59-128.19 (2C, m), 108.16 (d,  $J = 23.9$  Hz), 78.97, 78.64 (rot), 65.97, 55.61 (rot), 55.42, 46.58 (rot), 46.01, 28.64-27.56 (2C, m), 23.56 (rot), 22.22;  $^{19}\text{F}$  NMR (365 MHz,  $\text{CDCl}_3$ )  $\delta$ : -78.17;  $^{31}\text{P}$  NMR (162 MHz,  $\text{CDCl}_3$ )  $\delta$ : 17.78;  $m/z$  LRMS (ESI + APCI) found  $[\text{M}+\text{H}]^+$  555.4,  $\text{C}_{32}\text{H}_{36}\text{N}_4\text{O}_3\text{P}^+$  requires 555.3.

**N-(5-(3-fluoro-4-(trifluoromethoxy)phenyl)pyrimidin-4-yl)-1,1,1-triphenyl- $\lambda^5$ -phosphanimine (2q)**

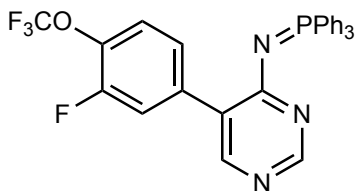

Prepared according to general procedure B (except the reaction was diluted and extracted with  $\text{CH}_2\text{Cl}_2$  instead of EtOAc during the workup) using (R)-2-((1-(tert-butoxycarbonyl)pyrrolidin-2-

yl)methoxy)pyrimidin-4-yl)triphenylphosphonium trifluoromethanesulfonate (167 mg, 0.25 mmol), sodium azide (20 mg, 0.31 mmol) and DMSO (0.17 mL) for 8 h. Flash column chromatography (silica gel was packed in hexanes and neutralized with  $\text{NEt}_3$  then: 50% EtOAc in hexanes to 55% EtOAc in hexanes) afforded the title compound as a off-white solid (126 mg, 0.24 mmol, 95% yield). mp 44-47 °C; IR  $\nu_{\text{max}}/\text{cm}^{-1}$  (film): 3057, 3010, 1571, 1516, 1450, 1435, 1419, 1398, 1250, 1214, 1168, 1106, 1020, 997, 716, 690;  $^1\text{H}$  NMR (400 MHz,  $\text{CDCl}_3$ )  $\delta$ : 8.33 (1H, s), 8.20 (1H, br s), 7.85-7.66 (7H, m), 7.57-7.47 (3H, m), 7.47-7.37 (6H, m), 7.19-7.05 (2H, m);  $^{13}\text{C}$  NMR (100 MHz,  $\text{CDCl}_3$ )  $\delta$ : 165.55 (d,  $J = 5.9$  Hz), 160.27 (d,  $J = 250.8$  Hz), 157.50, 154.42, 148.68 (dd,  $J = 11.0, 2.1$  Hz), 133.04 (d,  $J = 9.8$  Hz), 132.80 (d,  $J = 5.1$  Hz), 131.91 (d,  $J = 2.8$  Hz), 128.82 (d,  $J = 100.9$  Hz), 128.37 (d,  $J = 12.2$  Hz), 124.45 (d,  $J = 15.3$  Hz), 120.46 (d,  $J = 23.3$  Hz), 120.42 (q,  $J = 257.7$  Hz), 115.95 (d,  $J = 3.2$  Hz), 100.87 (d,  $J = 26.5$  Hz);  $^{19}\text{F}$  NMR (365 MHz,  $\text{CDCl}_3$ )  $\delta$ : -57.99, -108.65 (t,  $J = 9.9$  Hz);  $^{31}\text{P}$  NMR (162 MHz,  $\text{CDCl}_3$ )  $\delta$ : 15.32;  $m/z$  LRMS (ESI + APCI) found  $[\text{M}+\text{H}]^+$  534.3,  $\text{C}_{29}\text{H}_{21}\text{F}_4\text{N}_3\text{OP}^+$  requires 534.1

***N*-(3-(3-fluoro-5-(5-(trifluoromethyl)pyridin-2-yl)phenyl)pyridin-4-yl)-1,1,1-triphenyl- $\lambda^5$ -phosphanimine (2r)**

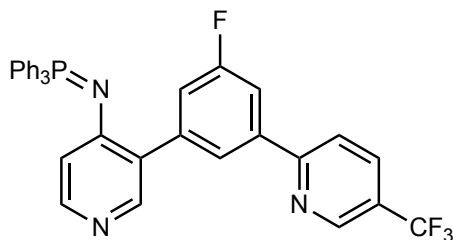

Prepared according to general procedure B using (3-(3-Fluoro-5-(5-(trifluoromethyl)pyridin-2-yl)phenyl)pyridin-4-yl)triphenylphosphonium trifluoromethanesulfonate (182 mg, 0.25 mmol), sodium azide (20 mg, mmol) and DMSO (0.17 mL) for 8 h. Flash column chromatography (silica gel packed in hexanes and neutralized with  $\text{NEt}_3$ , gradient elution: 50% EtOAc in hexanes to 75% EtOAc in hexanes) afforded the title compound as a white solid (104 mg, 0.17 mmol, 70% yield). mp 80-83 °C; IR  $\nu_{\text{max}}/\text{cm}^{-1}$  (film): 3056, 2989, 2925, 1579, 1484, 1401, 1355, 1327, 1131, 1108, 1082, 1040, 753, 718, 692;  $^1\text{H}$  NMR (400 MHz,  $\text{CDCl}_3$ )  $\delta$ : 8.94-8.91 (1H, m), 8.38 (1H, d,  $J = 2.9$  Hz), 8.18 (1H, t,  $J = 1.5$  Hz), 7.95-7.89 (2H, m), 7.82-7.75 (2H, m), 7.70-7.60 (7H, m), 7.57-7.49 (3H, m), 7.41 (6H, td,  $J = 7.8, 3.0$  Hz), 6.33 (1H, d,  $J = 5.7$  Hz);  $^{13}\text{C}$  NMR (100 MHz,  $\text{CDCl}_3$ )  $\delta$ : 162.95 (d,  $J = 244.1$  Hz), 159.74 (q,  $J = 1.6$

Hz), 155.86, 150.02 (d,  $J = 2.2$  Hz), 148.93, 146.54 (q,  $J = 4.1$  Hz), 141.80 (d,  $J = 8.5$  Hz), 139.00 (d,  $J = 8.2$  Hz), 133.89 (q,  $J = 3.5$  Hz), 132.45 (d,  $J = 10.0$  Hz), 132.17 (d,  $J = 2.9$  Hz), 130.41, 129.69 (d,  $J = 100.5$  Hz), 128.82 (d,  $J = 12.2$  Hz), 125.00 (q,  $J = 33.1$  Hz), 124.69 (d,  $J = 2.4$  Hz), 123.68 (q,  $J = 272.1$  Hz), 119.93, 118.75 (d,  $J = 22.1$  Hz), 116.89 (d,  $J = 11.1$  Hz), 112.10 (d,  $J = 23.3$  Hz);  $^{19}\text{F}$  NMR (365 MHz,  $\text{CDCl}_3$ )  $\delta$ : -62.25, -114.34;  $^{31}\text{P}$  NMR (162 MHz,  $\text{CDCl}_3$ )  $\delta$ : 6.60;  $m/z$  LRMS (ESI + APCI) found  $[\text{M}+\text{H}]^+$  594.3,  $\text{C}_{35}\text{H}_{25}\text{F}_4\text{N}_3\text{P}^+$  requires 594.2.

**1,1,1-Triphenyl-*N*-(3'-(trifluoromethyl)-[2,2':5',3''-terpyridin]-4''-yl)- $\lambda^5$ -phosphanimine (2s)**

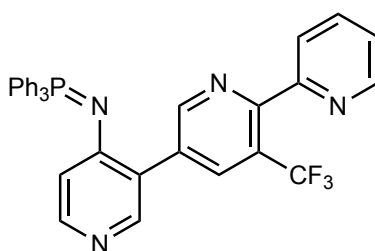

Prepared according to general procedure B using triphenyl(3'-(trifluoromethyl)-[2,2':5',3''-terpyridin]-4''-yl)phosphonium trifluoromethanesulfonate (178 mg, 0.25 mmol), sodium azide (20 mg, 0.31 mmol) and DMSO (0.17 mL) for 20 h. Flash column chromatography (silica gel packed in hexanes and neutralized with  $\text{NEt}_3$ , gradient elution: 100% EtOAc to 5% MeOH in  $\text{CH}_2\text{Cl}_2$ ) afforded the title compound as a light yellow oil (108 mg, 0.19 mmol, 75% yield). IR  $\nu_{\text{max}}/\text{cm}^{-1}$  (film): 3055, 2989, 2928, 1580, 1489, 1476, 1452, 1439, 1419, 1386, 1355, 1331, 1133, 1109, 1036, 753, 718;  $^1\text{H}$  NMR (400 MHz,  $\text{CDCl}_3$ )  $\delta$ : 9.11 (1H, d,  $J = 1.7$  Hz), 8.80 (1H, d,  $J = 1.9$  Hz), 8.75 (1H, ddd,  $J = 4.9, 1.7, 0.9$  Hz), 8.38 (1H, d,  $J = 2.6$  Hz), 7.95 (1H, d,  $J = 5.7$  Hz), 7.85 (1H, ddd,  $J = 9.5, 7.5, 1.8$  Hz), 7.74 (1H, d,  $J = 7.8$  Hz), 7.71-7.63 (6H, m), 7.60-7.54 (3H, m), 7.48 (6H, td,  $J = 7.6, 3.1$  Hz), 7.38, (1H, ddd,  $J = 7.5, 4.9, 1.2$  Hz), 6.34 (1H, d,  $J = 5.7$  Hz);  $^{13}\text{C}$  NMR (100 MHz,  $\text{CDCl}_3$ )  $\delta$ : 157.29, 156.49, 153.96 (q,  $J = 1.6$  Hz), 151.86, 149.98 (d,  $J = 2.4$  Hz), 149.62, 149.01, 136.70 (q,  $J = 5.0$  Hz), 136.29, 134.19, 132.49-132.31 (2C, m), 129.20 (d,  $J = 100.36$  Hz), 128.97 (d,  $J = 12.2$  Hz), 126.61 (d,  $J = 23.7$  Hz), 123.90 (q,  $J = 273.4$  Hz), 123.84 (q,  $J = 32.3$  Hz), 123.80 (d,  $J = 1.3$  Hz), 123.27, 116.75 (d,  $J = 12.4$  Hz);  $^{19}\text{F}$  NMR (365 MHz,  $\text{CDCl}_3$ )  $\delta$ : -57.33;  $^{31}\text{P}$  NMR (162 MHz,  $\text{CDCl}_3$ )  $\delta$ : 8.68;  $m/z$  LRMS (ESI + APCI) found  $[\text{M}+\text{H}]^+$  577.3,  $\text{C}_{34}\text{H}_{25}\text{F}_3\text{N}_4\text{P}^+$  requires 577.2.

**3-(4-Chlorophenyl)-N,N-dimethyl-3-(4-((triphenyl-λ5-phosphanylidene)amino)pyridin-2-yl)propan-1-amine (2t)**

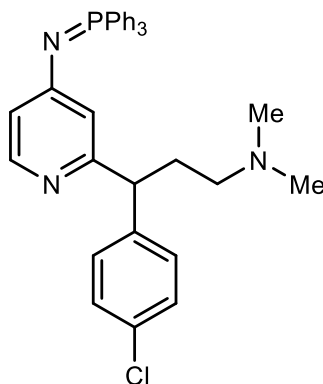

Prepared according to general procedure B using (2-(1-(4-chlorophenyl)-3-(dimethylamino)propyl)pyridin-4-yl)triphenylphosphonium trifluoromethanesulfonate (137 mg, 0.20 mmol), sodium azide (16 mg, 0.25 mmol) and DMSO (0.13 mL) for 20.5 h. Flash column chromatography (silica gel packed in hexanes and neutralized with NEt<sub>3</sub>, gradient elution: 5% MeOH in CH<sub>2</sub>Cl<sub>2</sub> to 5% MeOH in CH<sub>2</sub>Cl<sub>2</sub> with 1% NH<sub>4</sub>OH) afforded the title compound as a Yellow Oil (31 mg, 0.06 mmol, 28% yield). IR  $\nu_{\max}/\text{cm}^{-1}$  (film): 3057, 2938, 2857, 2815, 2766, 1582, 1475, 1437, 1351, 1180, 1107, 1043, 1026, 1014, 750; (400 MHz, CDCl<sub>3</sub>)  $\delta$ : 8.00 (1H, d, J = 5.6 Hz), 7.70-7.60 (6H, m), 7.59-7.51 (3H, m), 7.49-7.40 (6H, m), 7.16-7.06 (4H, m), 6.45 (1H, d, J = 5.6 Hz), 6.40 (1H, s), 3.81 (1H, t, J = 7.3 Hz), 2.33-2.06 (9H, m), 2.02-1.90 (1H, m); <sup>13</sup>C NMR (100 MHz, CDCl<sub>3</sub>)  $\delta$ : 162.63, 159.23, 148.81, 142.46, 132.49 (d, J = 9.8 Hz), 132.13 (d, J = 2.8 Hz), 131.56, 129.47 (d, J = 99.3 Hz), 129.41, 128.80 (d, J = 12.1 Hz), 128.24, 117.00 (d, J = 19.1 Hz), 116.89 (d, J = 19.7 Hz), 57.95, 50.69, 45.44, 32.55; <sup>31</sup>P NMR (162 MHz, CDCl<sub>3</sub>)  $\delta$ : 8.10; *m/z* LRMS (ESI + APCI) found [M+H]<sup>+</sup> 550.3, C<sub>34</sub>H<sub>34</sub>ClN<sub>3</sub>P<sup>+</sup> requires 550.2.

Ethyl

**4-(8-chloro-4-((triphenyl- $\lambda^5$ -phosphaneylidene)amino)-5,6-dihydro-11H-benzo[5,6]cyclohepta[1,2-b]pyridin-11-ylidene)piperidine-1-carboxylate (2u)**

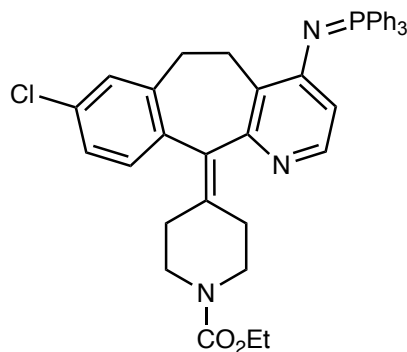

Prepared according to general procedure B using (8-chloro-11-(1-(ethoxycarbonyl)piperidin-4-ylidene)-6,11-dihydro-5Hbenzo[5,6]cyclohepta[1,2-b]pyridin-4-yl)triphenylphosphonium trifluoromethanesulfonate (198 mg, 0.25 mmol), sodium azide (20 mg, 0.31 mmol) and DMSO (0.17 mL) for 15.25 h. Flash column chromatography (silica gel packed in hexanes and neutralized with  $\text{NEt}_3$ : 6% MeOH in  $\text{CH}_2\text{Cl}_2$ ) followed by filtration through a neutralized plug of silica ( $\text{NEt}_3$ ) eluting with 5% MeOH in hexanes afforded the title compound as a yellow crystalline solid (68 mg, 0.10 mmol, 41% yield). mp 166-170 °C; IR  $\nu_{\text{max}}/\text{cm}^{-1}$  (film): 3054, 2989, 2912, 1693, 1560, 1465, 1434, 1367, 1339, 1230, 1121, 718;  $^1\text{H}$  NMR (400 MHz,  $\text{CDCl}_3$ )  $\delta$ : 7.77 (1H, d,  $J = 5.6$  Hz), 7.75-7.66 (6H, m), 7.57 (3H, td,  $J = 7.2, 1.6$  Hz), 7.48 (6H, td,  $J = 7.7, 3.0$  Hz), 7.19 (1H, s), 7.13-7.10 (2H, m), 6.08 (1H, dd,  $J = 5.6, 0.9$  Hz), 4.12 (2H, q,  $J = 7.1$  Hz), 3.84 (2H, br s), 3.44-3.26 (3H, m), 3.12-3.00 (2H, m), 2.91-2.81 (1H, m), 2.81-2.37 (2H, m), 2.34-2.25 (2H, m), 1.24 (3H, t,  $J = 7.1$  Hz);  $^{13}\text{C}$  NMR (100 MHz,  $\text{CDCl}_3$ )  $\delta$ : 163.57 (br), 155.24, 147.49 (br), 141.55 (br), 140.21, 138.19 (br), 137.80, 133.20, 133.03 (d,  $J = 2.6$  Hz), 132.28 (d,  $J = 10.1$  Hz), 130.11, 129.26 (d,  $J = 12.4$  Hz), 128.41 (d,  $J = 23.71$  Hz), 128.12, 127.56 (d,  $J = 101.6$  Hz), 127.50 (br), 126.31, 113.16 (d,  $J = 12.3$  Hz), 61.16, 45.57, 44.05, 43.97, 31.06, 30.51, 28.15, 14.57;  $^{31}\text{P}$  NMR (162 MHz,  $\text{CDCl}_3$ )  $\delta$ : 5.25;  $m/z$  LRMS (ESI + APCI) found  $[\text{M}+\text{H}]^+$  658.3,  $\text{C}_{40}\text{H}_{38}\text{ClN}_3\text{O}_2\text{P}^+$  requires 658.2.

***N*-((6*S*,10*R*)-8-benzyl-7,8,9,10-tetrahydro-6*H*-6,10-methanoazepino[4,5-*g*]quinoxalin-2-yl)-1,1,1-triphenyl- $\lambda^5$ -phosphanimine (2v)**

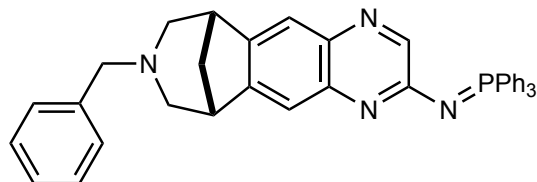

Prepared according to general procedure B using ((6*S*,10*R*)-8-benzyl-7,8,9,10-tetrahydro-6*H*-6,10-methanoazepino[4,5-*g*]quinoxalin-2-yl)triphenylphosphonium trifluoromethanesulfonate (178 mg, 0.25 mmol), sodium azide (20 mg, 0.31 mmol) and DMSO (0.17 mL) for 42.25 h. Flash column chromatography (silica gel packed in hexanes and neutralized with  $\text{NEt}_3$ : 40% EtOAc in hexanes) followed by filtration through a neutralized plug of silica ( $\text{NEt}_3$ ) eluting with 20% EtOAc in hexanes to afford the title compound as a dark yellow oil (73 mg, 0.13 mmol, 51% yield). IR  $\nu_{\text{max}}/\text{cm}^{-1}$  (film): 3059, 2945, 2787, 1532, 1467, 1438, 1389, 1303, 1216, 1108, 951, 906, 718;  $^1\text{H}$  NMR (400 MHz,  $\text{CDCl}_3$ )  $\delta$ : 8.57 (1H, s), 7.98-7.85 (6H, m), 7.59-7.51 (4H, m), 7.46 (6H, td,  $J = 7.6, 2.8$  Hz), 7.16-7.04 (4H, m), 6.86 (2H, d,  $J = 6.7$  Hz), 3.47 (2H, s), 3.19 (1H, m), 3.10 (1H, m), 2.91 (1H, dd,  $J = 10.3, 2.4$  Hz), 2.85 (1H, dd,  $J = 10.3, 2.5$  Hz), 2.51 (1H, d,  $J = 9.9$  Hz), 2.44 (1H, d,  $J = 10.0$  Hz), 2.25-2.16 (1H, m), 1.17 (1H, d,  $J = 10.5$  Hz);  $^{13}\text{C}$  NMR of this compound is poorly resolved, containing several broad and overlapping peaks (see S172);  $^{31}\text{P}$  NMR (162 MHz,  $\text{CDCl}_3$ )  $\delta$ : 16.75;  $m/z$  LRMS (ESI + APCI) found  $[\text{M}+\text{H}]^+$  577.3,  $\text{C}_{38}\text{H}_{34}\text{N}_4\text{P}^+$  requires 577.3.



***N*-(5-chloro-6'-methyl-3-(4-(methylsulfonyl)phenyl)-[2,3'-bipyridin]-4'-yl)-1,1,1-triphenyl- $\lambda^5$ -phosphanimine (2w)**

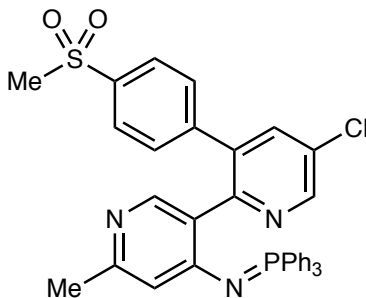

Prepared according to general procedure B using (5-chloro-6'-methyl-3-(4-(methylsulfonyl)phenyl)-[2,3'-bipyridin]-4'-yl)triphenylphosphonium trifluoromethanesulfonate (192 mg, 0.25 mmol), sodium azide (20 mg, 0.31 mmol) and DMSO (0.17 mL) for 39.75 h. Flash column chromatography (silica gel packed in hexanes and neutralized with  $\text{NEt}_3$ : 5% MeOH in  $\text{CH}_2\text{Cl}_2$ ) afforded the title compound as a yellow crystalline solid (94 mg, 0.15 mmol, 60% yield). mp 116-120 °C; IR  $\nu_{\text{max}}/\text{cm}^{-1}$  (film): 3055, 2989, 2923, 1589, 1494, 1438, 1413, 1312, 1150, 1109, 719;  $^1\text{H}$  NMR (400 MHz,  $\text{CDCl}_3$ )  $\delta$ : 8.73 (1H, d,  $J = 2.3$  Hz), 8.34 (1H, d,  $J = 3.0$  Hz), 7.64 (1H, d,  $J = 2.3$  Hz), 7.59-7.50 (5H, m), 7.41 (6H, td,  $J = 7.9, 3.0$  Hz), 7.24-7.16 (8H, m), 5.78 (1H, s), 2.99 (3H, s), 2.15 (3H, s);  $^{13}\text{C}$  NMR (100 MHz,  $\text{CDCl}_3$ )  $\delta$ : 157.41, 156.47, 154.99, 148.79, 147.48, 144.96, 139.05, 137.40, 136.08, 132.27, (d,  $J = 2.9$  Hz), 132.14 (d,  $J = 10.0$  Hz), 130.15, 129.50, 129.00 (d,  $J = 100.4$  Hz), 128.75 (d,  $J = 12.2$  Hz), 128.19 (d,  $J = 24.8$  Hz), 126.85, 115.06 (d,  $J = 11.3$  Hz), 44.48, 23.83;  $^{31}\text{P}$  NMR (162 MHz,  $\text{CDCl}_3$ )  $\delta$ : 6.76;  $m/z$  LRMS (ESI + APCI) found  $[\text{M}+\text{H}]^+$  634.2,  $\text{C}_{36}\text{H}_{30}\text{ClN}_3\text{O}_2\text{PS}^+$  requires 634.2

***N*-3-((4-(4-aminopyridin-3-yl)pyrimidin-2-yl)amino)-4-methylphenyl)-4-((4-methylpiperazin-1-yl)methyl)benzamide (2x)**

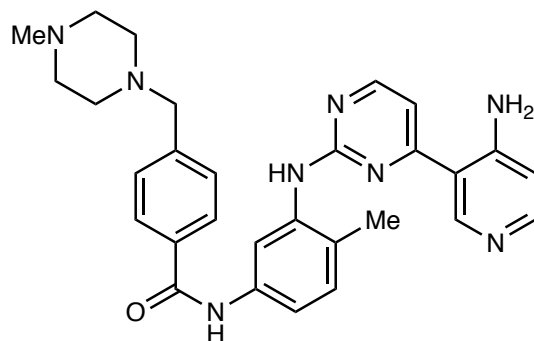

An 8 mL vial equipped with a screw cap and septa was charged with (3-(2-((2-methyl-5-(4-((4-methylpiperazin-1-yl)methyl)benzamido)phenyl)amino)pyrimidin-4-yl)pyridin-4-yl)triphenylphosphonium trifluoromethanesulfonate and (2-((2-Methyl-5-(4-((4-methylpiperazin-1-yl)methyl)benzamido)phenyl)amino)-6-(pyridin-3-yl)pyrimidin-4-yl)triphenylphosphonium trifluoromethanesulfonate (20:1 mixture of regioisomers, 90 mg, 0.10 mmol), sodium azide (8 mg, 0.13 mmol) and DMSO (0.07 mL) and heated for 13.75 h at 100 °C. The reaction was cooled to room temperature and an additional 70  $\mu$ L of DMSO and 20  $\mu$ L of H<sub>2</sub>O were added and the mixture stirred for 52 h. Flash column chromatography (silica gel packed in hexanes and neutralized with NEt<sub>3</sub>, gradient elution: 10% MeOH in CH<sub>2</sub>Cl<sub>2</sub> to 10% MeOH in CH<sub>2</sub>Cl<sub>2</sub> with 1% NEt<sub>3</sub>) afforded the title compound as a dark yellow solid (20 mg, 0.04 mmol, 40% yield). mp 226-229 °C; IR  $\nu_{\text{max}}$ /cm<sup>-1</sup> (film): 3285, 2935, 2804, 1609, 1562, 1530, 1507, 1457, 1290, 1241, 1211, 1163, 1139, 1053, 1010, 816; <sup>1</sup>H NMR (400 MHz, CD<sub>3</sub>OD)  $\delta$ : 8.62 (1H, br s), 8.30 (1H, d, *J* = 5.6 Hz), 7.88-7.81(3H, m), 7.76 (1H, d, *J* = 2.0 Hz), 7.53 (1H, dd, *J* = 8.3, 2.1 Hz), 7.42 (2H, d, *J* = 8.2 Hz), 7.24 (1H, d, *J* = 8.3 Hz), 7.19 (1H, d, *J* = 5.6 Hz), 6.56 (1H, d, *J* = 6.0 Hz), 3.55 (2H, s), 2.46 (8H, br s), 2.26-2.19 (6H, m); <sup>13</sup>C NMR (100 MHz CD<sub>3</sub>OD)  $\delta$ : 168.55, 166.56, 162.09, 159.23, 156.38, 150.48, 149.65, 142.96, 139.05, 138.48, 135.31, 131.88, 131.61, 130.55, 128.67, 120.32, 119.87, 114.44, 112.52, 107.48, 63.27, 55.74, 53.59, 45.98, 17.84; *m/z* LRMS (ESI + APCI) found [M+H]<sup>+</sup> 509.3, C<sub>29</sub>H<sub>33</sub>N<sub>8</sub>O<sup>+</sup> requires 509.3

## 5. Derivatization Reactions

### 5,6,7,8-Tetrahydroquinolin-4-amine (3aa)

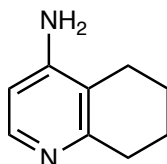

An 8mL vial equipped with a screw cap and septa was charged with 1,1,1-triphenyl-*N*-(5,6,7,8-tetrahydroquinolin-4-yl)- $\lambda^5$ -phosphanimine (204 mg, 0.5 mmol) and 0.5 mL of a 9:1 mixture of DMF/H<sub>2</sub>O. The vial was sealed and heated at 100 °C for 44 h before the reaction was loaded directly onto a silica gel column. Flash column chromatography (silica gel packed in hexanes and neutralized with NEt<sub>3</sub>, gradient elution: 5% MeOH in CH<sub>2</sub>Cl<sub>2</sub> to 1% MeOH in basified<sup>§</sup> CH<sub>2</sub>Cl<sub>2</sub> to 2.5% MeOH in basified CH<sub>2</sub>Cl<sub>2</sub> followed by filtration through a plug of basic alumina by gradient elution: 1% MeOH in CH<sub>2</sub>Cl<sub>2</sub> to 10% MeOH in CH<sub>2</sub>Cl<sub>2</sub>) followed by filtration through a plug of basic alumina eluting with 5% MeOH in CH<sub>2</sub>Cl<sub>2</sub> to afford the title compound as a white crystalline solid (61 mg, 0.41 mmol, 83% yield). mp 121-125 °C; IR  $\nu_{\max}/\text{cm}^{-1}$  (film): 3329, 3190, 2930, 1637, 1589, 1481, 1452, 1351, 1164, 1066, 820; <sup>1</sup>H NMR (400 MHz, CDCl<sub>3</sub>)  $\delta$ : 7.97 (1H, d, *J* = 5.3 Hz), 6.33 (1H, d, *J* = 5.4 Hz), 4.16 (2H, br s), 2.84-2.72 (2H, m), 2.44-2.31 (2H, m), 1.88-1.72 (4H, m); <sup>13</sup>C NMR (100 MHz, CDCl<sub>3</sub>)  $\delta$ : 156.86, 150.90, 146.59, 115.71, 106.98, 32.65, 22.79, 22.67, 22.39; *m/z* LRMS (ESI + APCI) found [M+H]<sup>+</sup> 149.2, C<sub>9</sub>H<sub>13</sub>N<sub>2</sub><sup>+</sup> requires 149.1.

<sup>§</sup> CH<sub>2</sub>Cl<sub>2</sub> was basified by shaking in a separatory funnel with aqueous ammonium hydroxide.

#### 4-Isothiocyanato-5,6,7,8-tetrahydroquinoline (3ab)

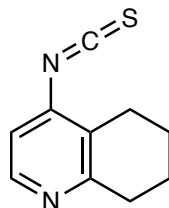

An 8 mL vial equipped with a screw cap and septa was charged with 1,1,1-triphenyl-*N*-(5,6,7,8-tetrahydroquinolin-4-yl)- $\lambda^5$ -phosphanimine (102 mg, 0.25 mmol), carbon disulfide (375  $\mu$ L) and toluene (1.25 mL). The vial was sealed and heated at 100 °C for 64 h until consumption of starting material was observed by LCMS analysis. The reaction mixture was cooled to room temperature, concentrated *in vacuo* and the crude material was directly purified by flash column chromatography (silica gel: 10% EtOAc in hexanes) to afford title compound as a yellow oil (24 mg, 0.13 mmol, 50% yield). IR  $\nu_{\max}/\text{cm}^{-1}$  (film): 2938, 2052, 1566, 1460, 1437, 1408, 1066, 832, 760;  $^1\text{H}$  NMR (400 MHz,  $\text{CDCl}_3$ )  $\delta$ : 8.32 (1H, d,  $J = 5.2$  Hz), 6.90 (1H, d,  $J = 5.2$  Hz), 2.95-2.87 (2H, m), 2.83-2.75 (2H, m), 1.93-1.80 (4H, m);  $^{13}\text{C}$  NMR (100 MHz,  $\text{CDCl}_3$ )  $\delta$ : 159.73, 147.49, 138.95, 138.35, 128.59, 117.42, 32.70, 24.90, 22.51, 22.03;  $m/z$  LRMS (ESI + APCI) found  $[\text{M}+\text{H}]^+$  191.1,  $\text{C}_{10}\text{H}_{11}\text{N}_2\text{S}^+$  requires 191.1

#### *N*-allyl-5,6,7,8-tetrahydroquinolin-4-amine (3ac)

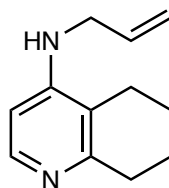

An 8 mL vial equipped with a screw cap and septa was charged with 1,1,1-triphenyl-*N*-(5,6,7,8-tetrahydroquinolin-4-yl)- $\lambda^5$ -phosphanimine (102 mg, 0.25 mmol), allyl iodide (34  $\mu$ L, 0.38 mmol) and MeCN (3.33 mL). The vial was sealed and heated at 90 °C for 41 h before additional allyl iodide (34  $\mu$ L, 0.38 mmol) was added. The reaction was heated at 90 °C for a further 21 h before being concentrated *in vacuo*, dissolved in MeOH (2 mL) and added to a chilled (0 °C) solution of MeOH (15 mL) and acetyl

chloride (0.35 mL, 5.0 mmol). The reaction mixture was stirred for 1 h at room temperature and then concentrated *in vacuo*. The crude material was directly purified by flash column chromatography (neutral alumina activated, gradient elution: 1% MeOH in CH<sub>2</sub>Cl<sub>2</sub> to 10% MeOH in CH<sub>2</sub>Cl<sub>2</sub> with 1% NEt<sub>3</sub>) followed by filtration through a plug of activated basic alumina eluting with 10% MeOH in CH<sub>2</sub>Cl<sub>2</sub>. A second round of flash column chromatography (neutral alumina activated, gradient elution: 1% MeOH in CH<sub>2</sub>Cl<sub>2</sub> to 10% MeOH in CH<sub>2</sub>Cl<sub>2</sub>) provided the title compound as a yellow solid (44 mg, 0.23 mmol, 94% yield). mp 204-206 °C; IR  $\nu_{\text{max}}/\text{cm}^{-1}$  (film): 3291, 3157, 2939, 1639, 1500, 1450, 1428, 1214, 1182, 845; <sup>1</sup>H NMR (400 MHz, CDCl<sub>3</sub>)  $\delta$ : 7.98 (1H, d, J = 7.2 Hz), 6.81 (1H, d, J = 7.2 Hz), 6.11-6.00 (1H, m), 5.34 (1H, d, J = 10.5), 5.00 (1H, d, J = 17.2 Hz), 4.87-4.80 (2H, m), 2.93-2.85 (2H, m), 2.54-2.46 (2H, m), 1.96-1.82 (4H, m); <sup>13</sup>C NMR (100 MHz, CDCl<sub>3</sub>)  $\delta$ : 159.22, 151.62, 143.15, 133.27, 119.47, 118.76, 108.64, 57.06, 27.40, 24.27, 22.43, 21.70; *m/z* LRMS (ESI + APCI) found [M+H]<sup>+</sup> 189.1, C<sub>12</sub>H<sub>17</sub>N<sub>2</sub><sup>+</sup> requires 189.1

## 6. Phosphine Competition Experiment

The reaction was conducted in accordance with general experimental B using Triphenyl(2-phenylpyridin-4-yl)phosphonium trifluoromethanesulfonate, except that tri-*p*-tolylphosphane (76 mg, 0.25 mmol) was also added at the start of the reaction. After the work up procedure, the reaction was analyzed by <sup>31</sup>P NMR and LCMS analysis.

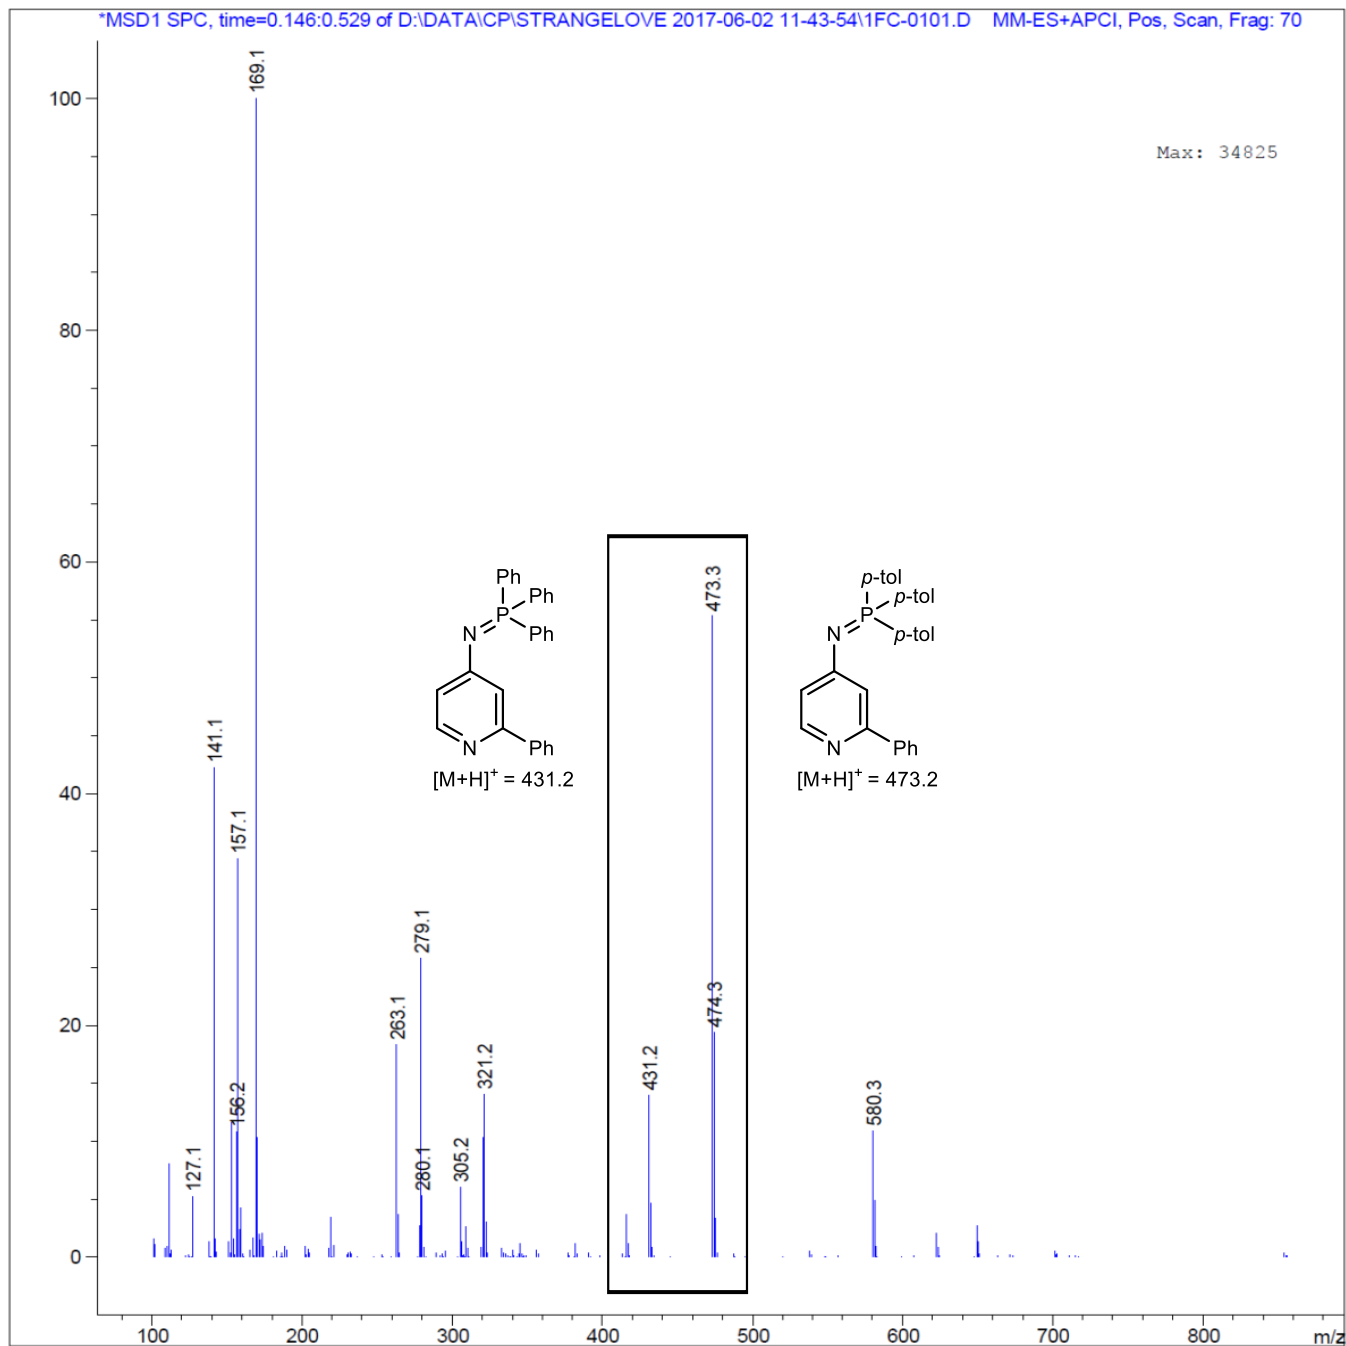

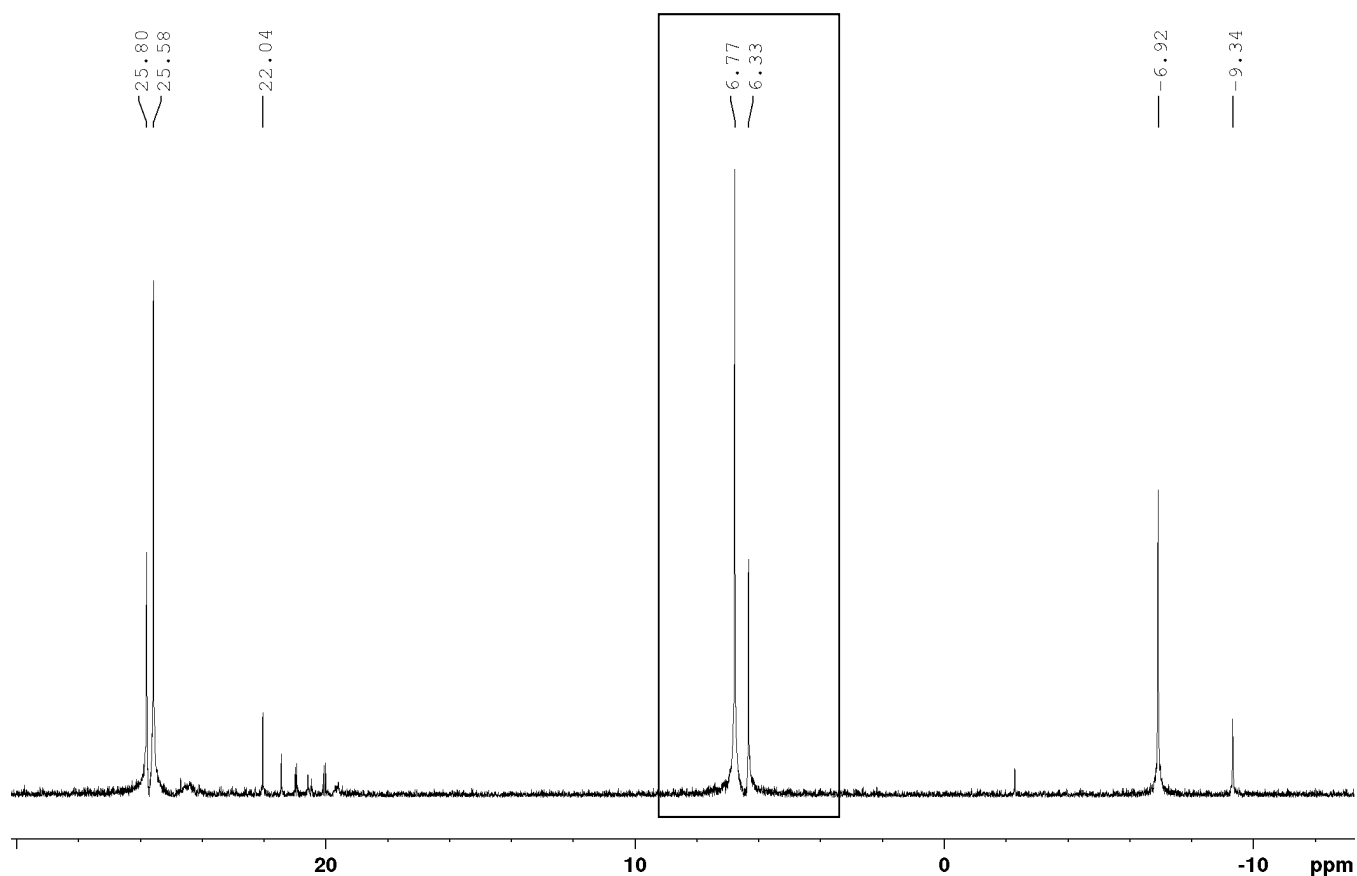

## 7. References

- S1. D. D. Perrin, W. L. F. Amarego, Purification of Laboratory Chemicals (Pergamon, Press, Oxford. ed. 3, 1988).
- S2. Hilton, M.; Dolewski, R.; McNally, A. Selective Functionalization of Pyridines via Heterocyclic Phosphonium Salts. *J. Am. Chem. Soc.*, 2016, 138 (42), pp 13806–13809.
- S3. Anderson, R.; Jett, B.; McNally, A. Selective Formation of Heteroaryl Thioethers via a Phosphonium Ion Coupling Reaction. *Tetrahedron*, 2017, <https://doi.org/10.1016/j.tet.2017.12.040>
- S4. Koniarczyk, J.; Hesk, D.; Overgard, A.; Davies, I.W.; McNally, A. A General Strategy for Site-Selective Incorporation of Deuterium and Tritium into Pyridines, Diazines and Pharmaceuticals, *J. Am. Chem. Soc.*, 2018, [doi.org/10.1021/jacs.7b11710](https://doi.org/10.1021/jacs.7b11710)

8.99  
8.98  
7.91  
7.90  
7.89  
7.87  
7.81  
7.80  
7.79  
7.78  
7.77  
7.76  
7.70  
7.68  
7.67  
7.65  
7.03  
6.98

CDCl<sub>3</sub>, 400 MHz

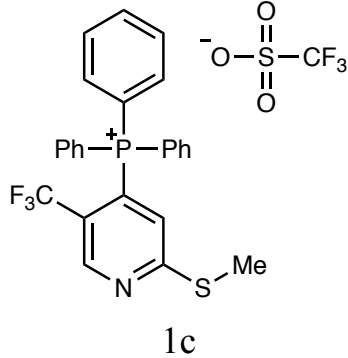

2.56

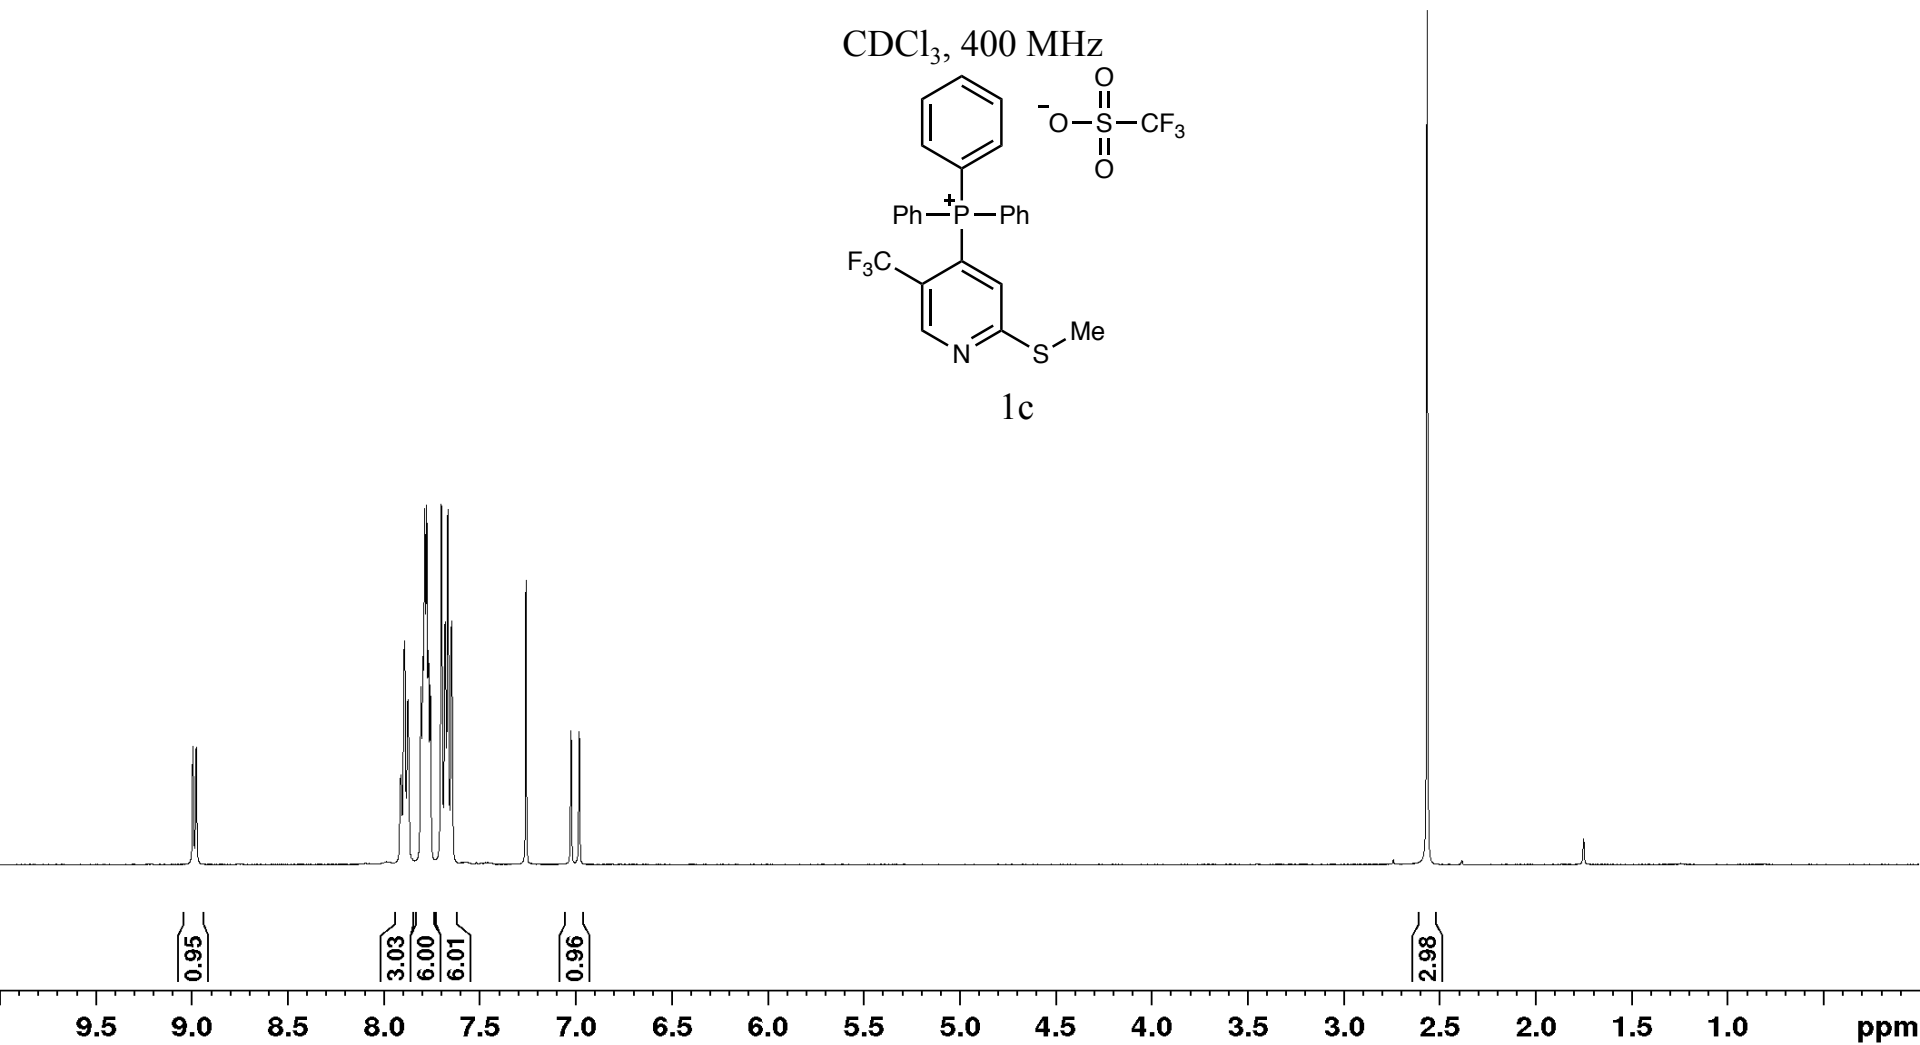



CDCl<sub>3</sub>, 100 MHz

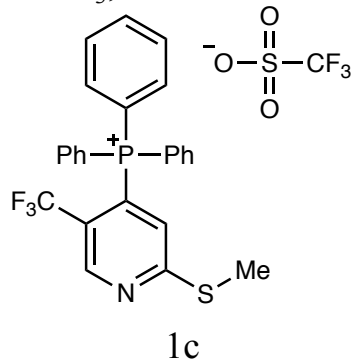

169.76  
169.66  
150.30  
150.24  
150.19  
150.13  
136.10  
136.07  
134.51  
134.40  
130.90  
130.76  
128.66  
128.57  
125.68  
124.90  
124.11  
124.09  
122.45  
121.38  
121.33  
121.29  
121.00  
120.96  
119.25  
116.73  
115.83

77.32  
77.00  
76.68

— 13.64

200 192 184 176 168 160 152 144 136 128 120 112 104 96 88 80 72 64 56 48 40 32 24 16 ppm

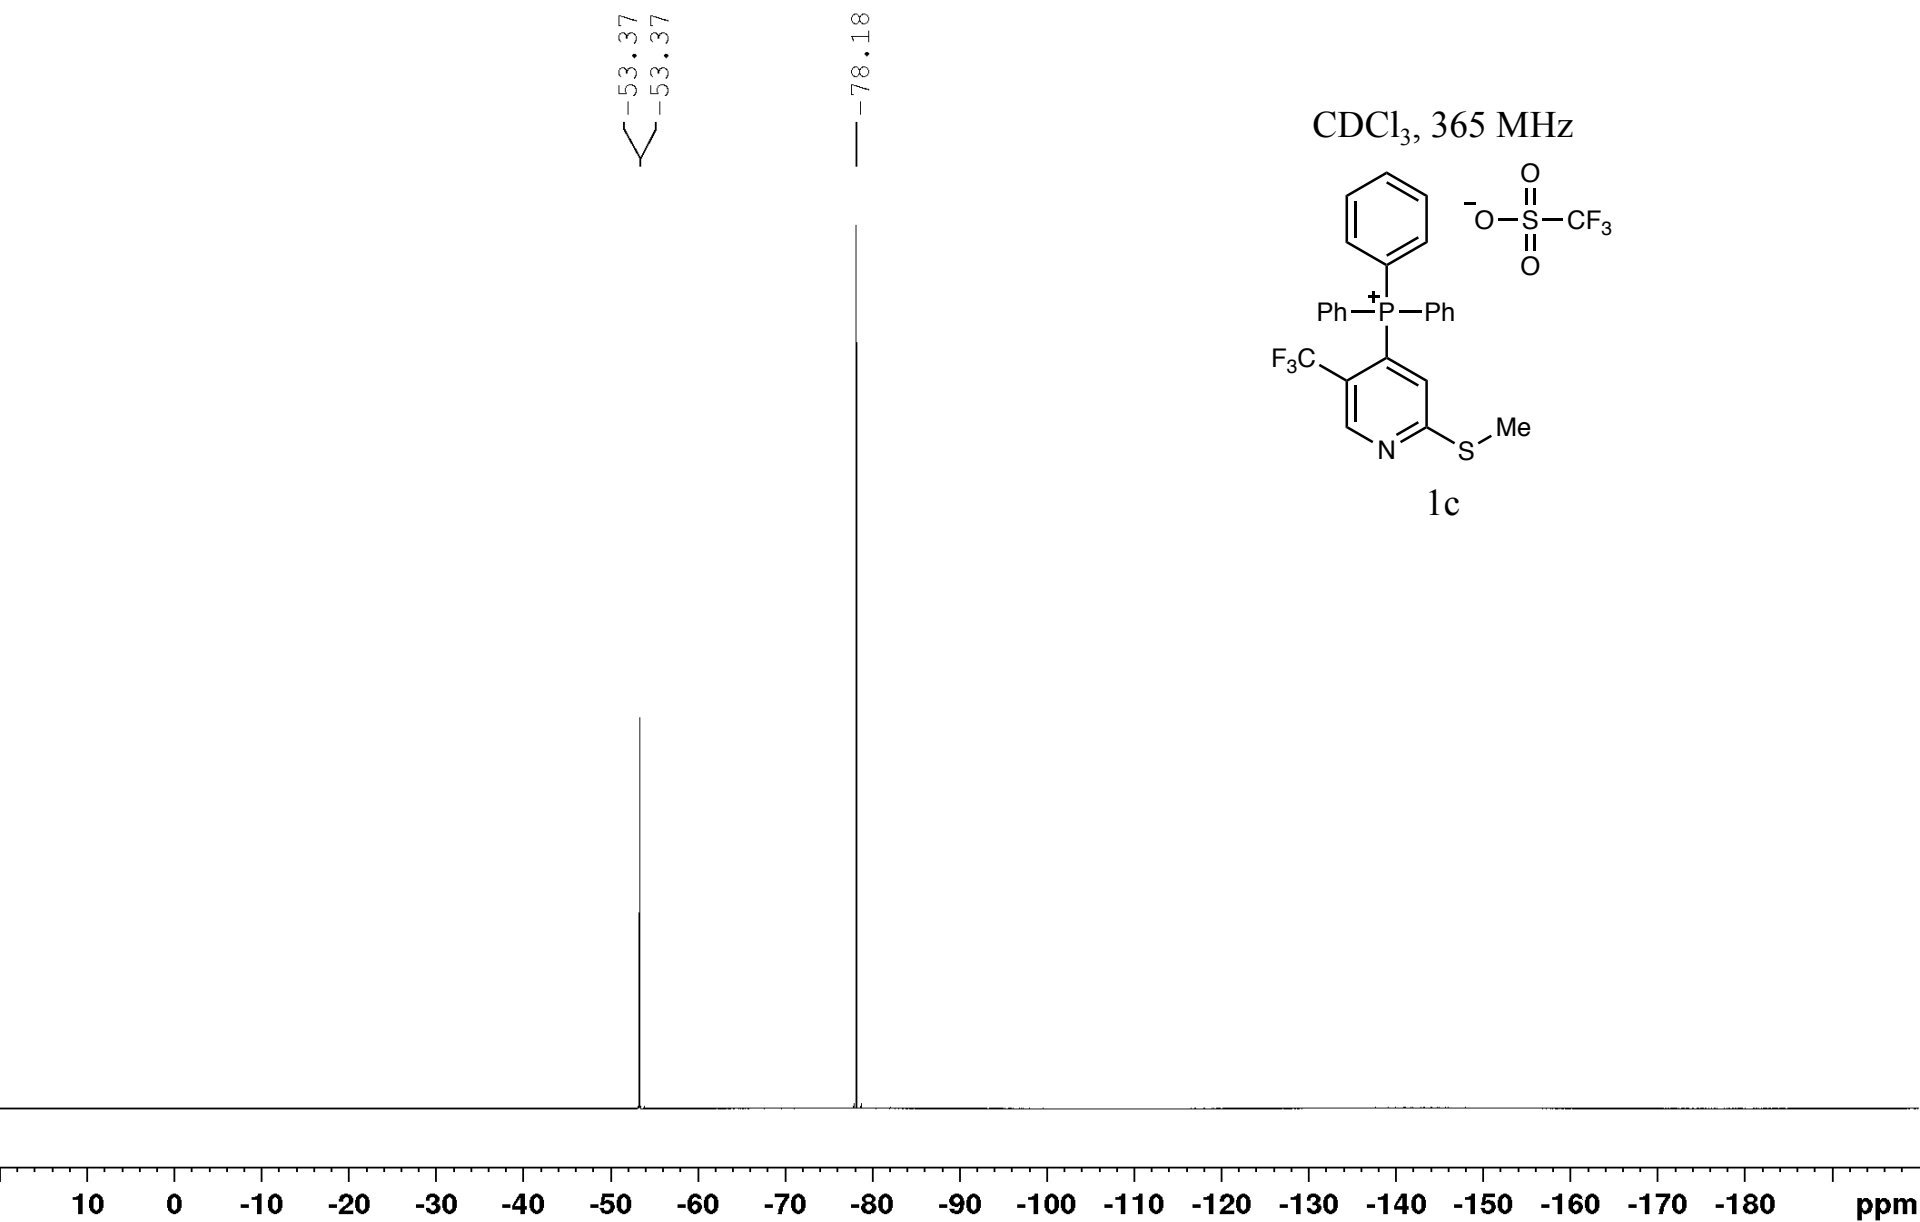

CDCl<sub>3</sub>, 162 MHz

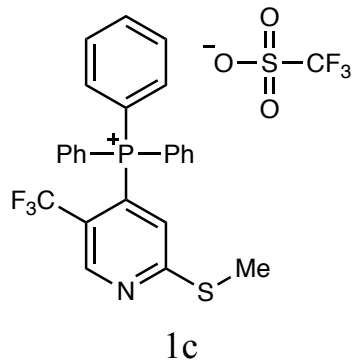

27.60  
27.59  
27.57  
27.56

140 130 120 110 100 90 80 70 60 50 40 30 20 10 0 -10 -20 -30 ppm

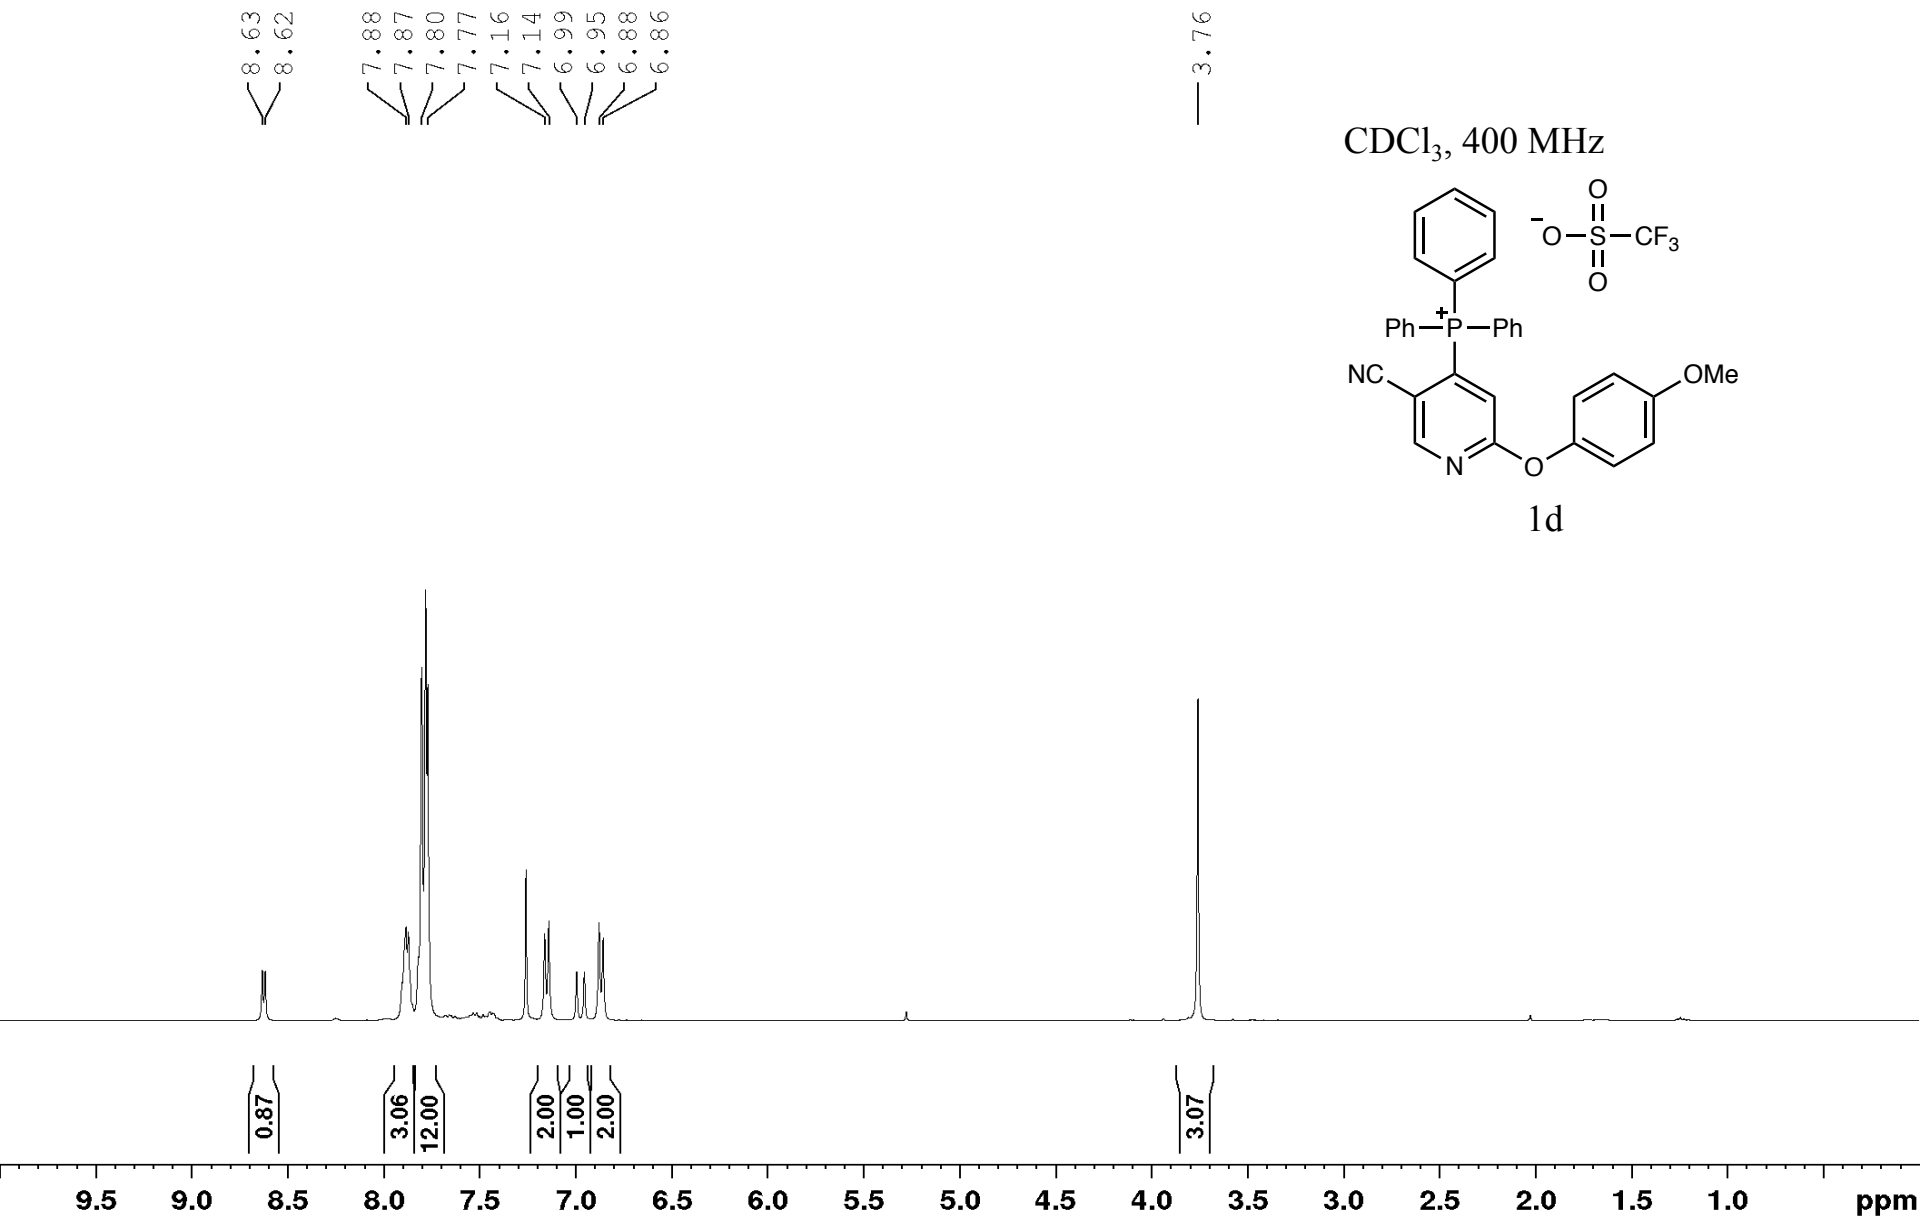

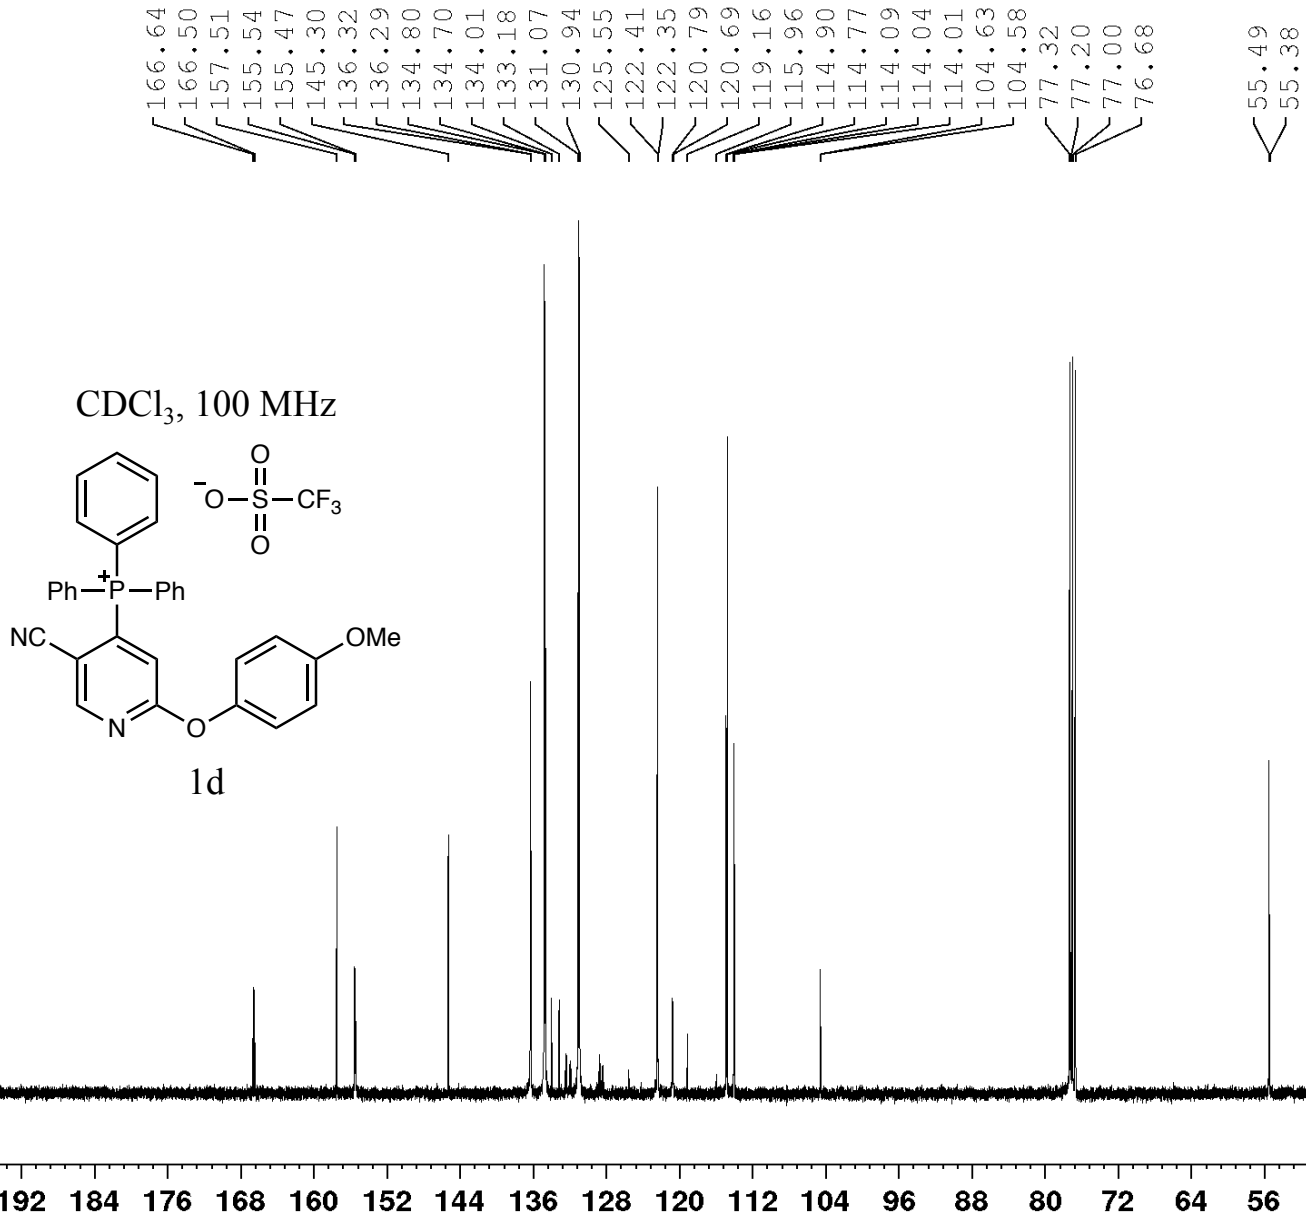

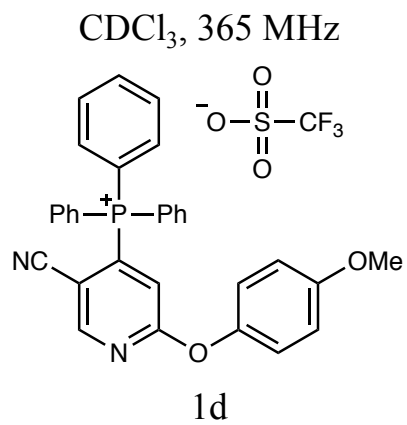

— -78.10

10 0 -10 -20 -30 -40 -50 -60 -70 -80 -90 -100 -110 -120 -130 -140 -150 -160 -170 -180 ppm

CDCl<sub>3</sub>, 162 MHz

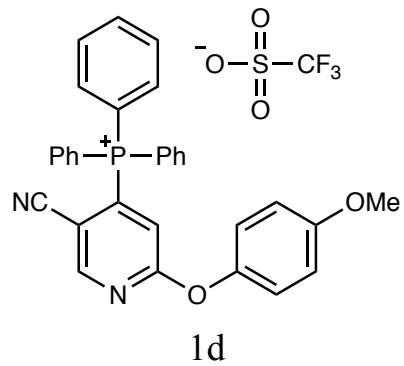

— 22.90

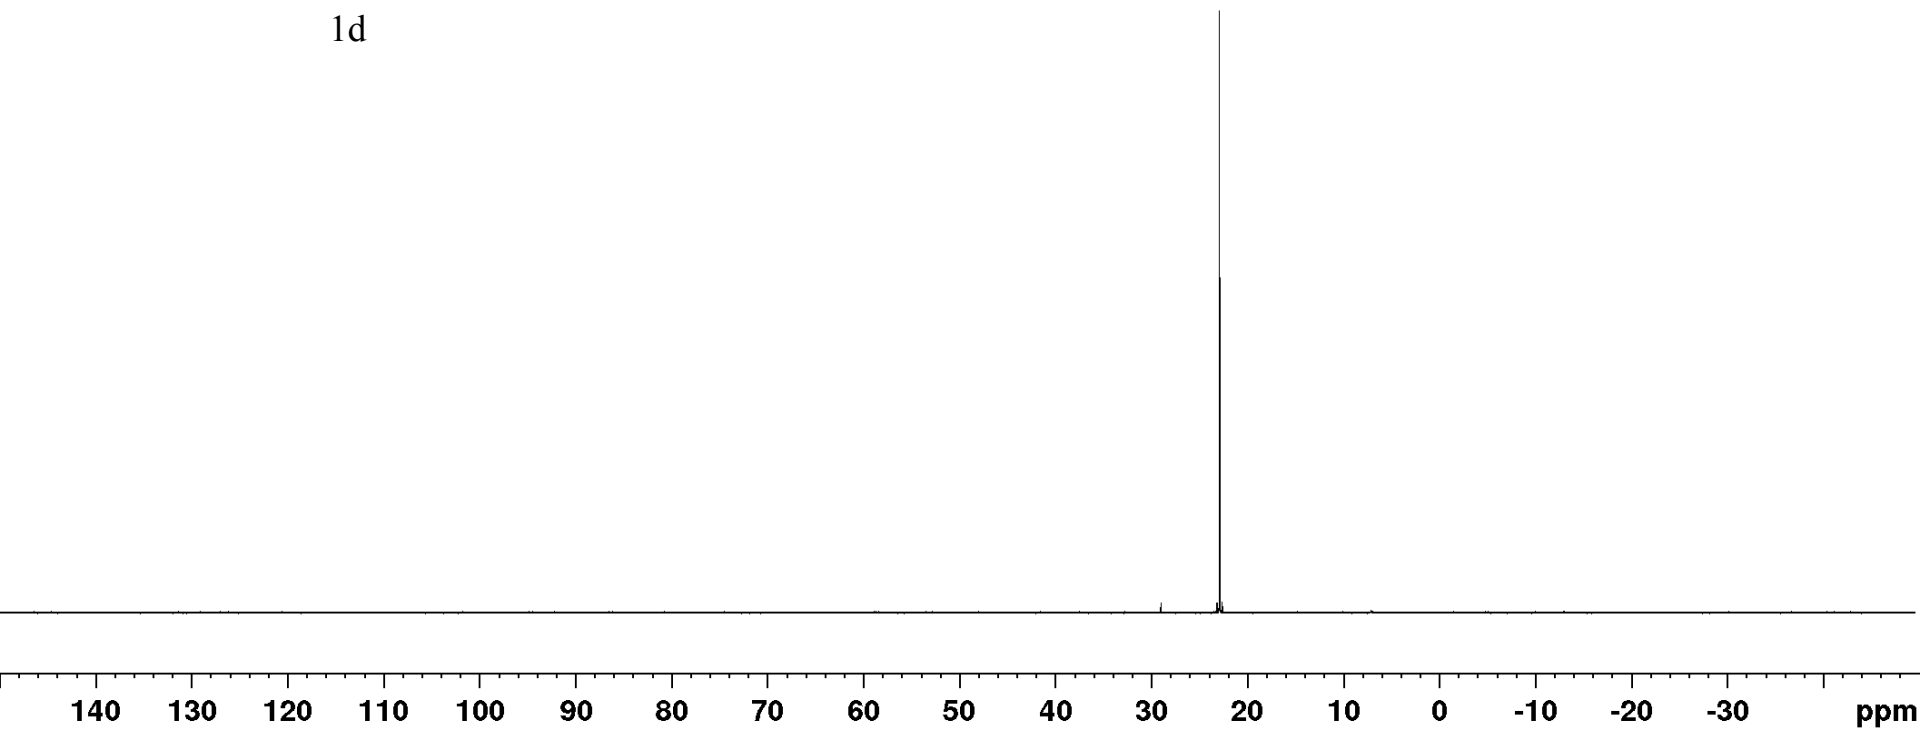

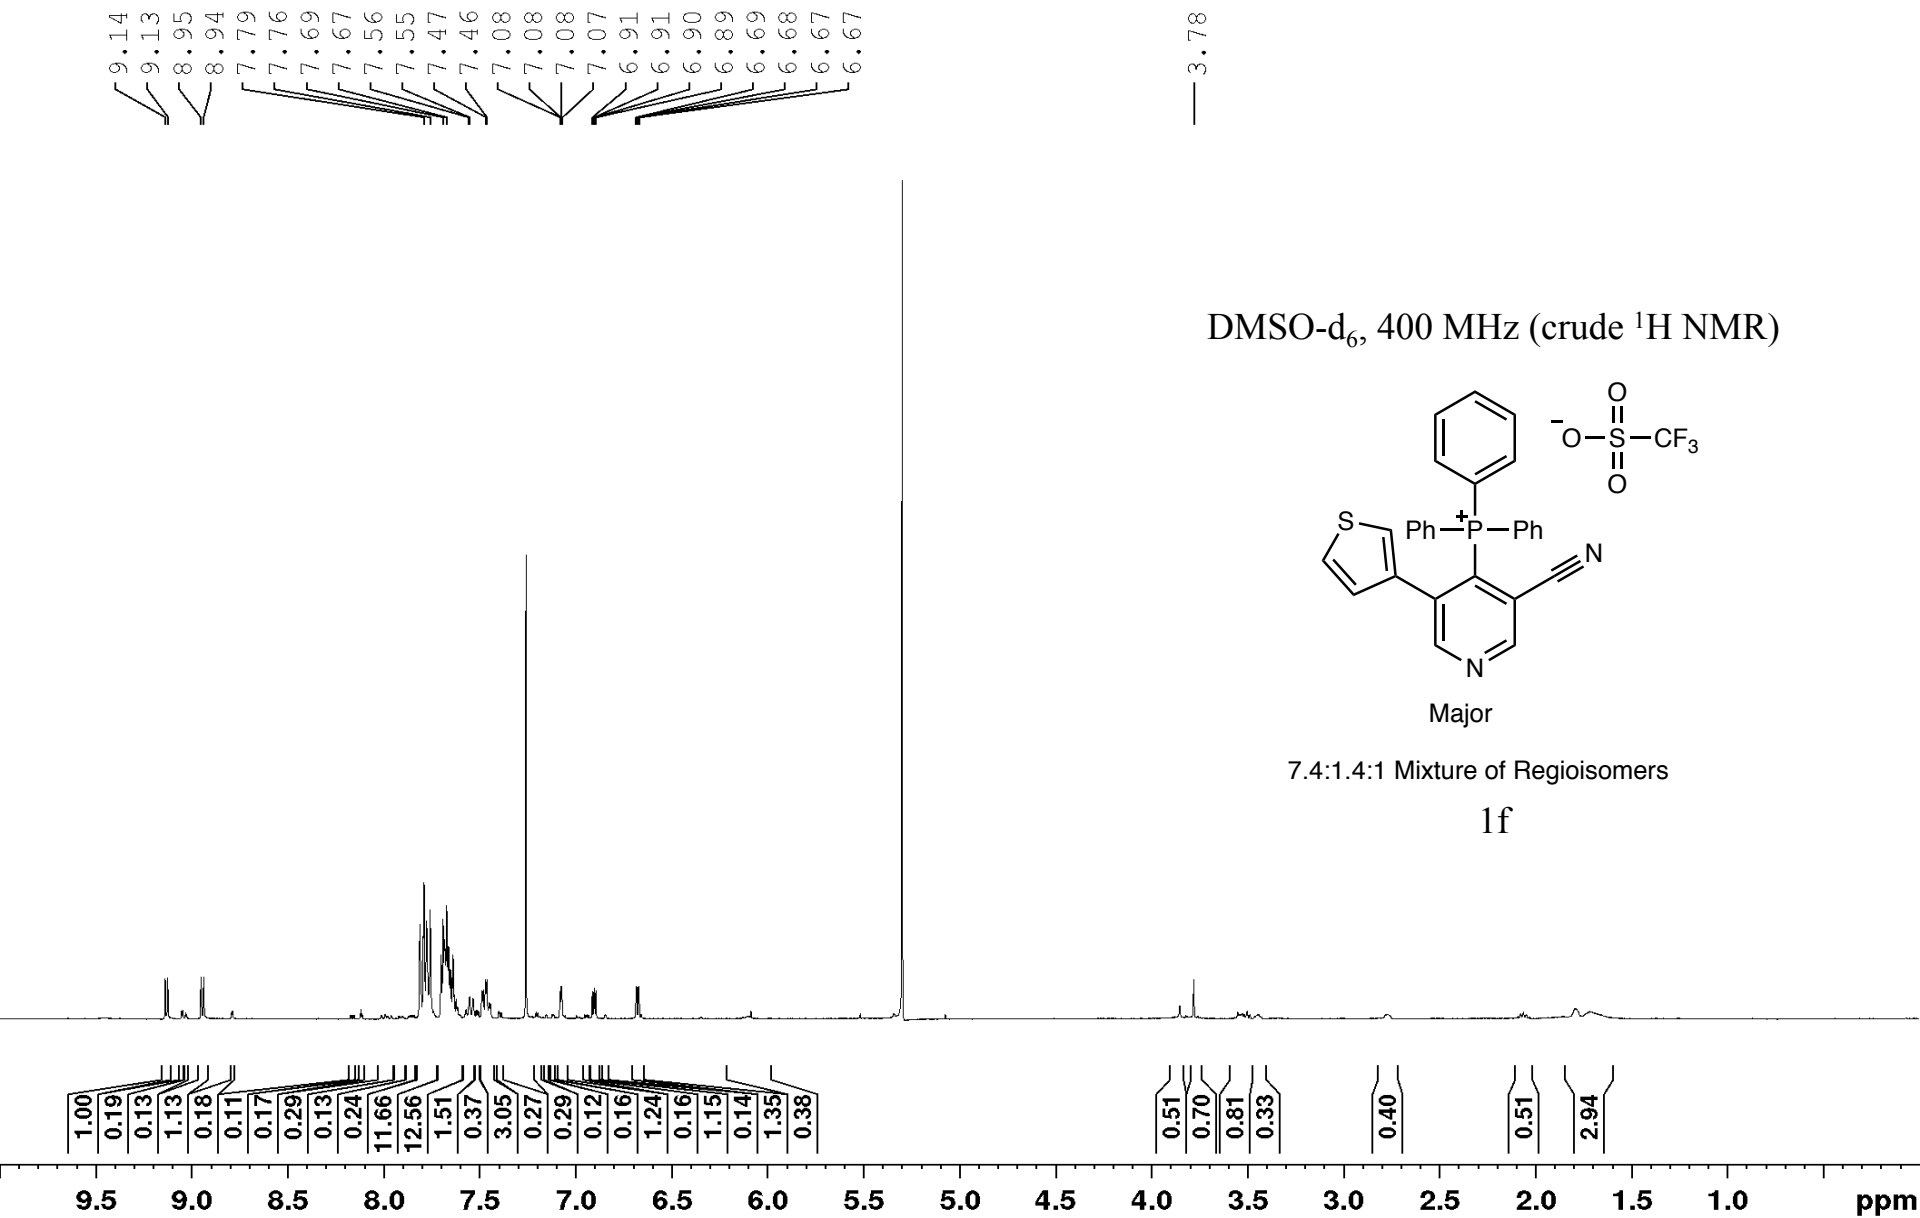



DMSO-d<sub>6</sub>, 400 MHz (crude <sup>1</sup>H NMR)

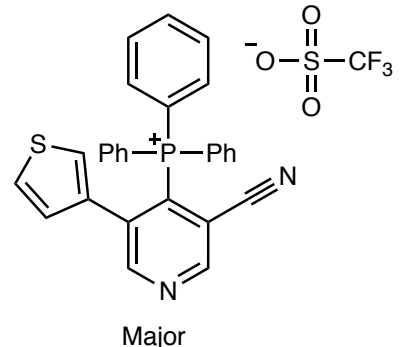

7.4:1.4:1 Mixture of Regioisomers  
1f

9.14  
9.13  
9.05  
9.05  
9.04  
9.03  
9.03  
8.95  
8.94

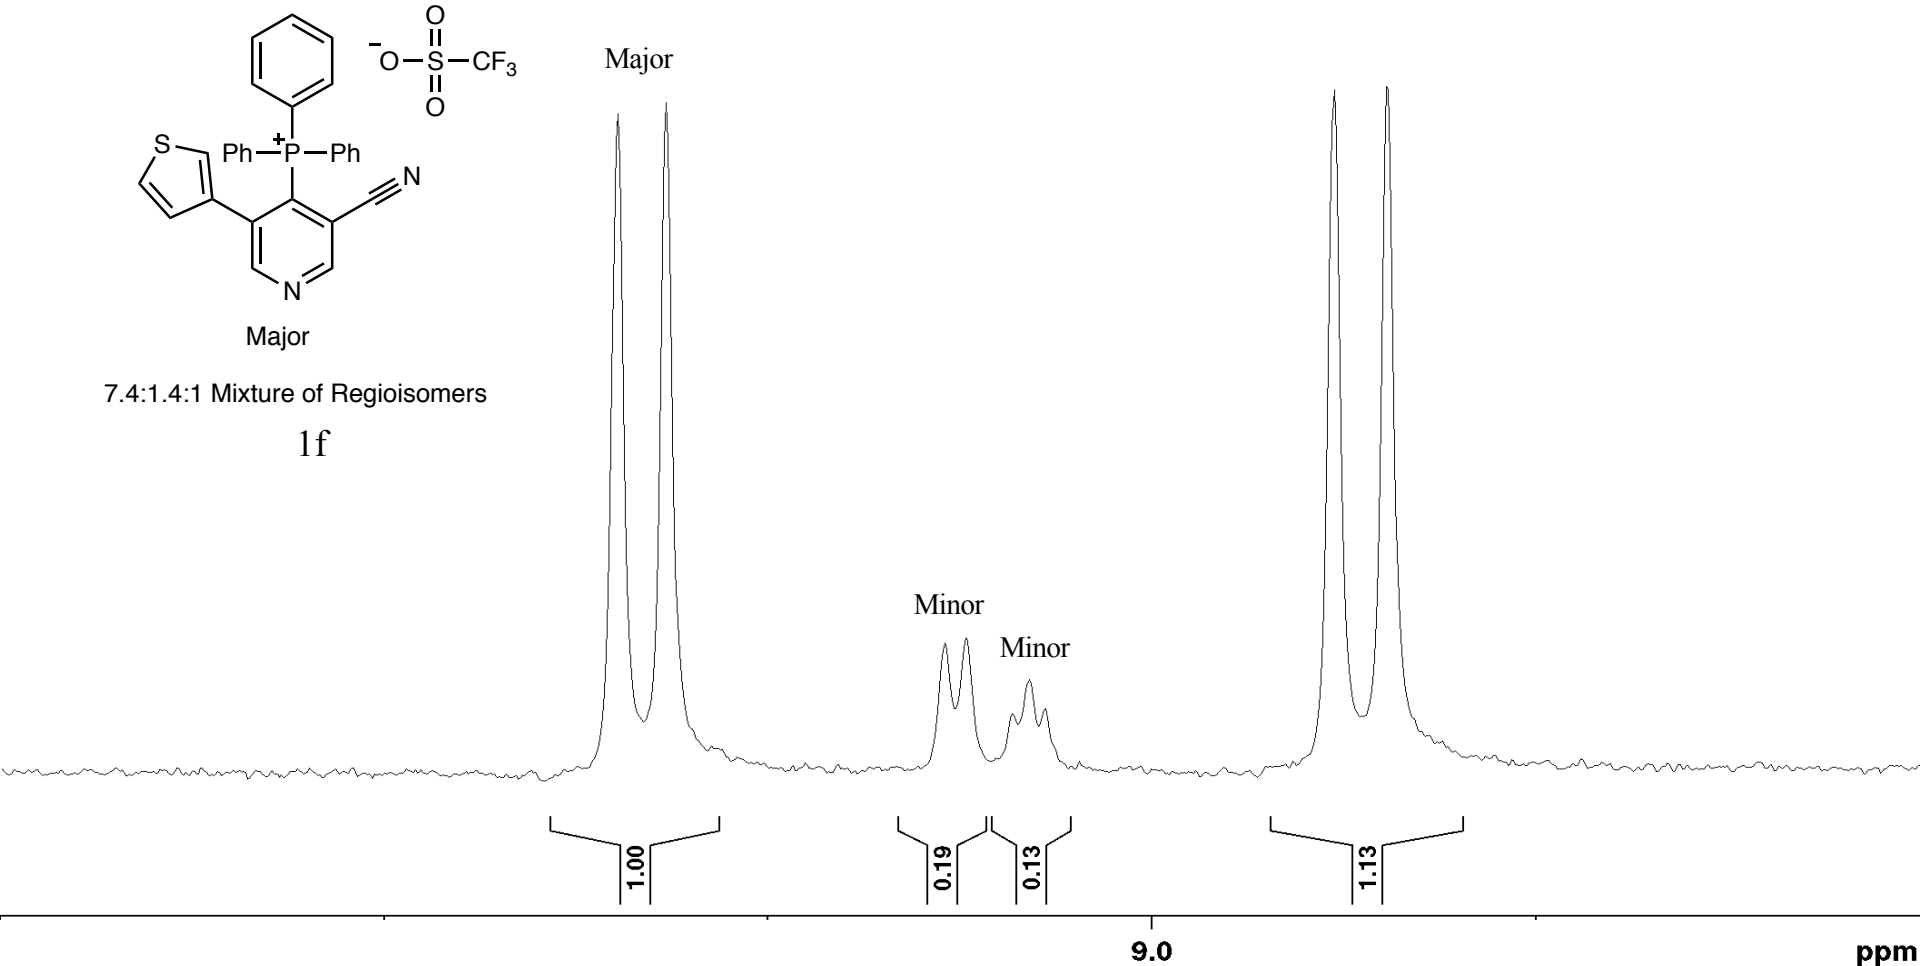

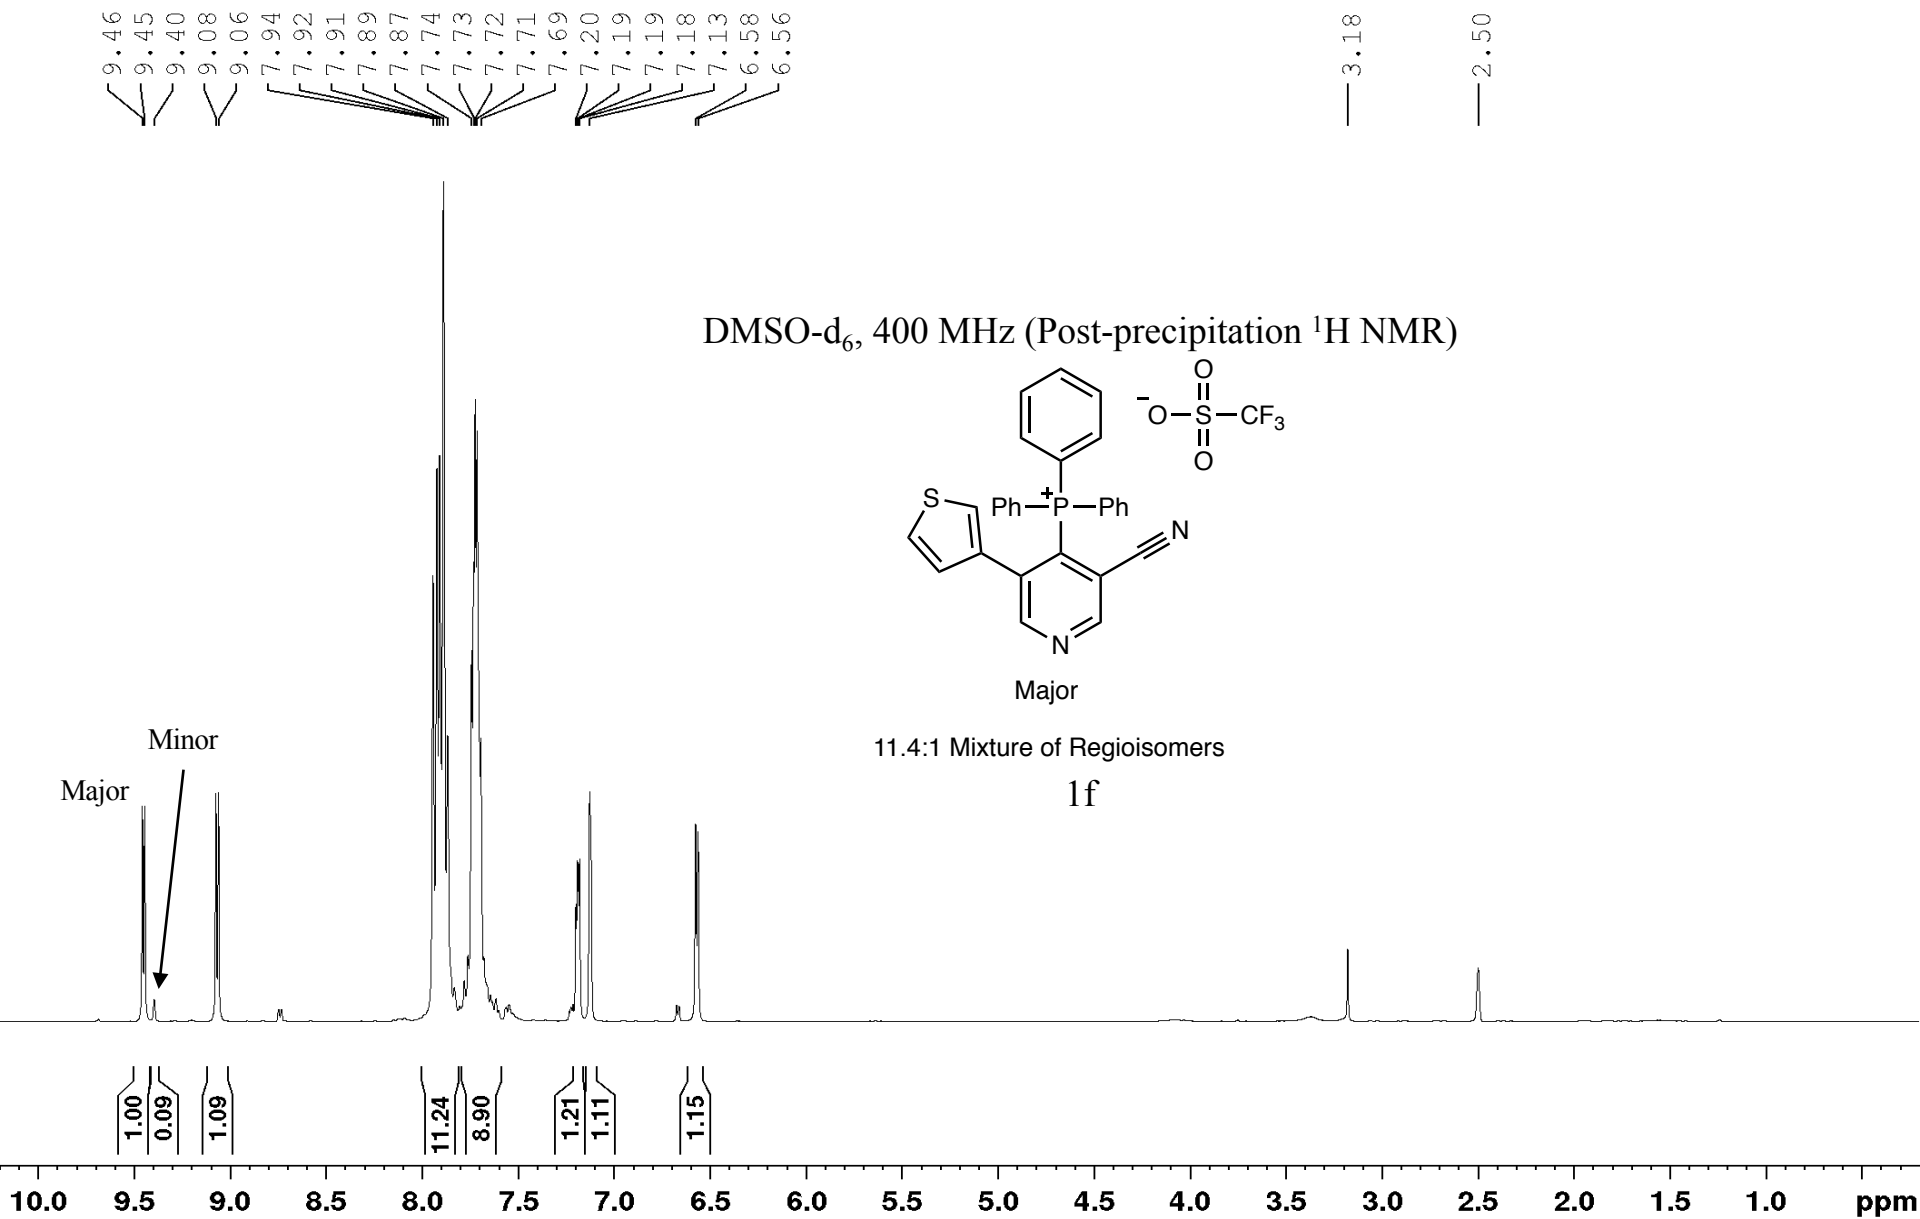

157.06  
156.99  
154.76  
154.71  
140.24  
140.19  
135.32  
135.29  
134.53  
134.43  
130.41  
130.28  
128.75  
128.47  
128.27  
127.91  
127.78  
125.50  
122.29  
119.08  
118.27  
117.44  
116.56  
113.94  
113.88  
113.23  
113.19

40.13  
39.92  
39.72  
39.51  
39.30  
39.09  
38.88

DMSO-d<sub>6</sub>, 100 MHz

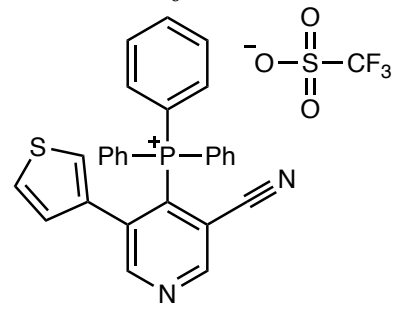

Major

11.4:1 Mixture of Regioisomers

1f

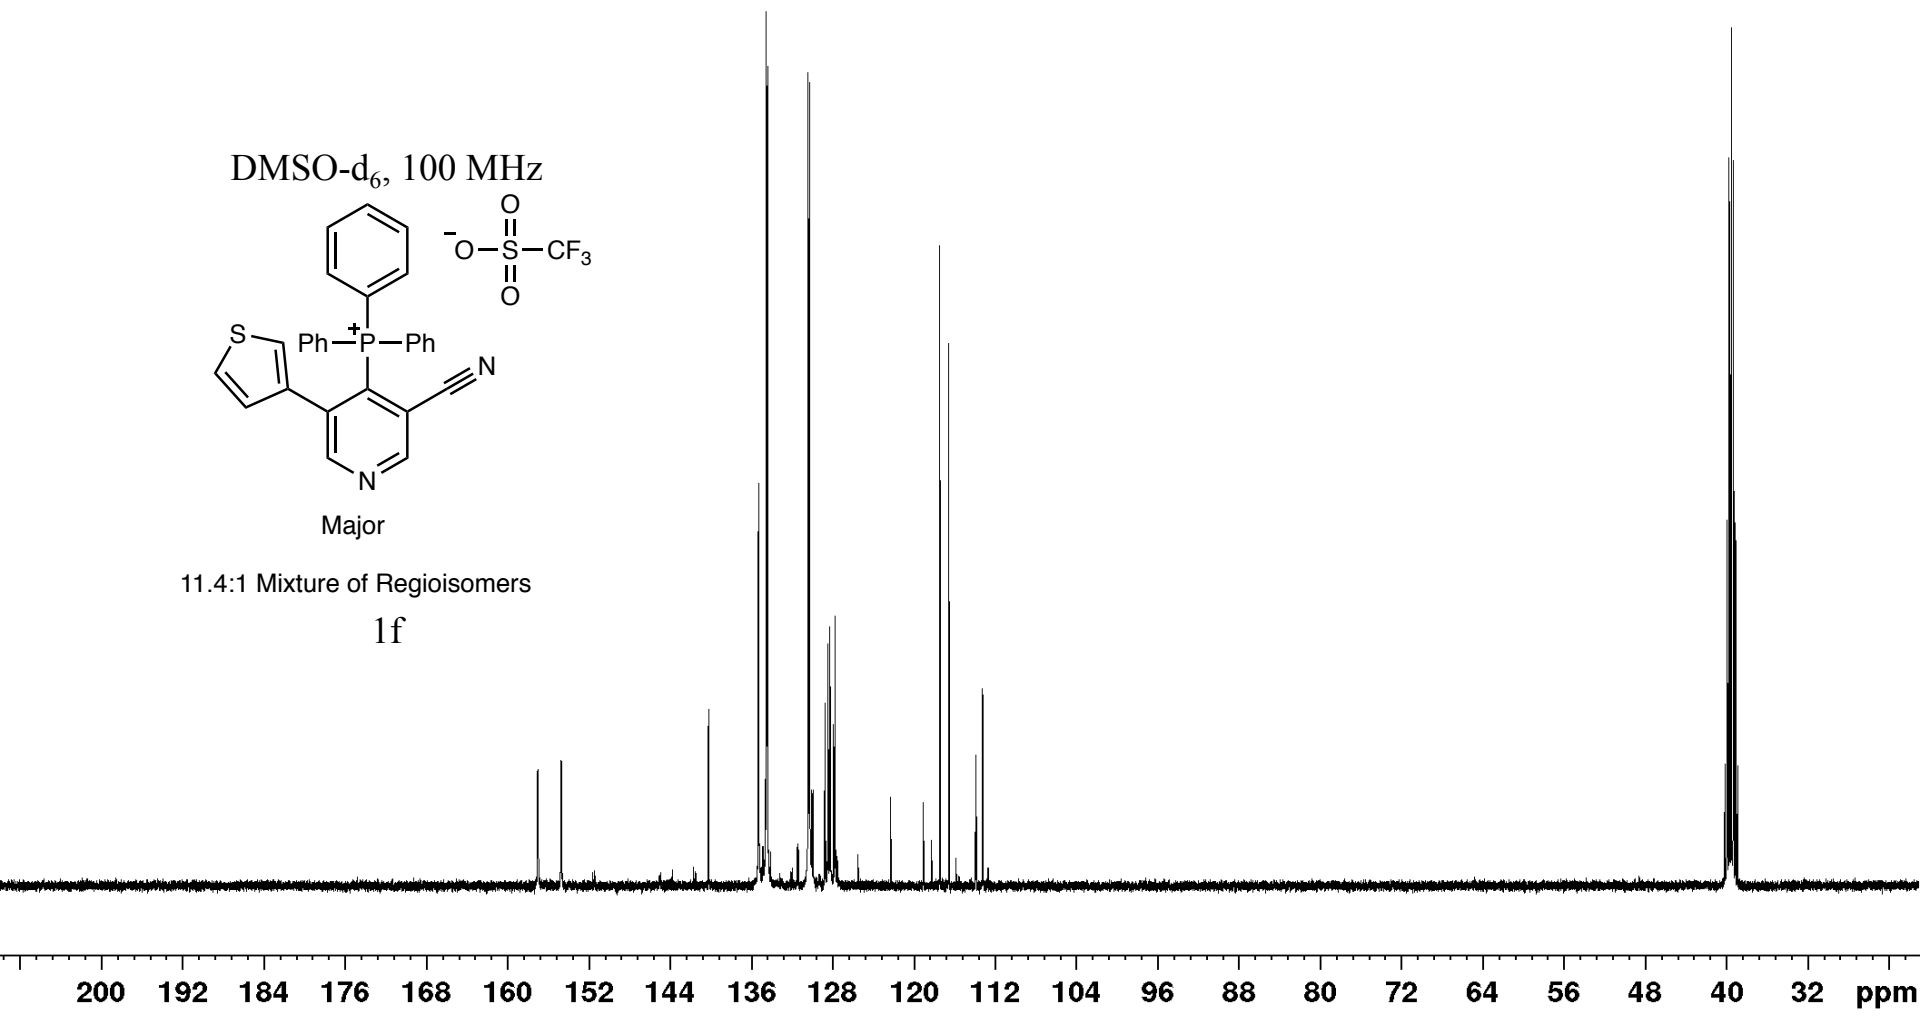

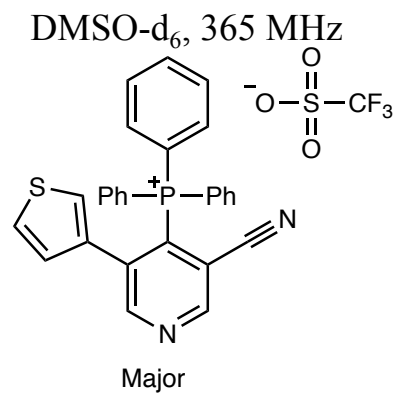

11.4:1 Mixture of Regioisomers

1f

— -77.67

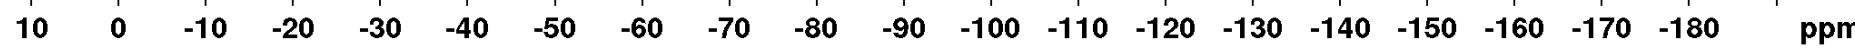

DMSO-d<sub>6</sub>, 162MHz

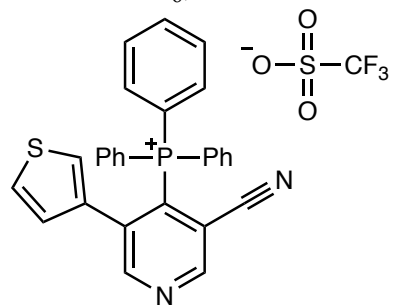

Major

11.4:1 Mixture of Regioisomers

1f

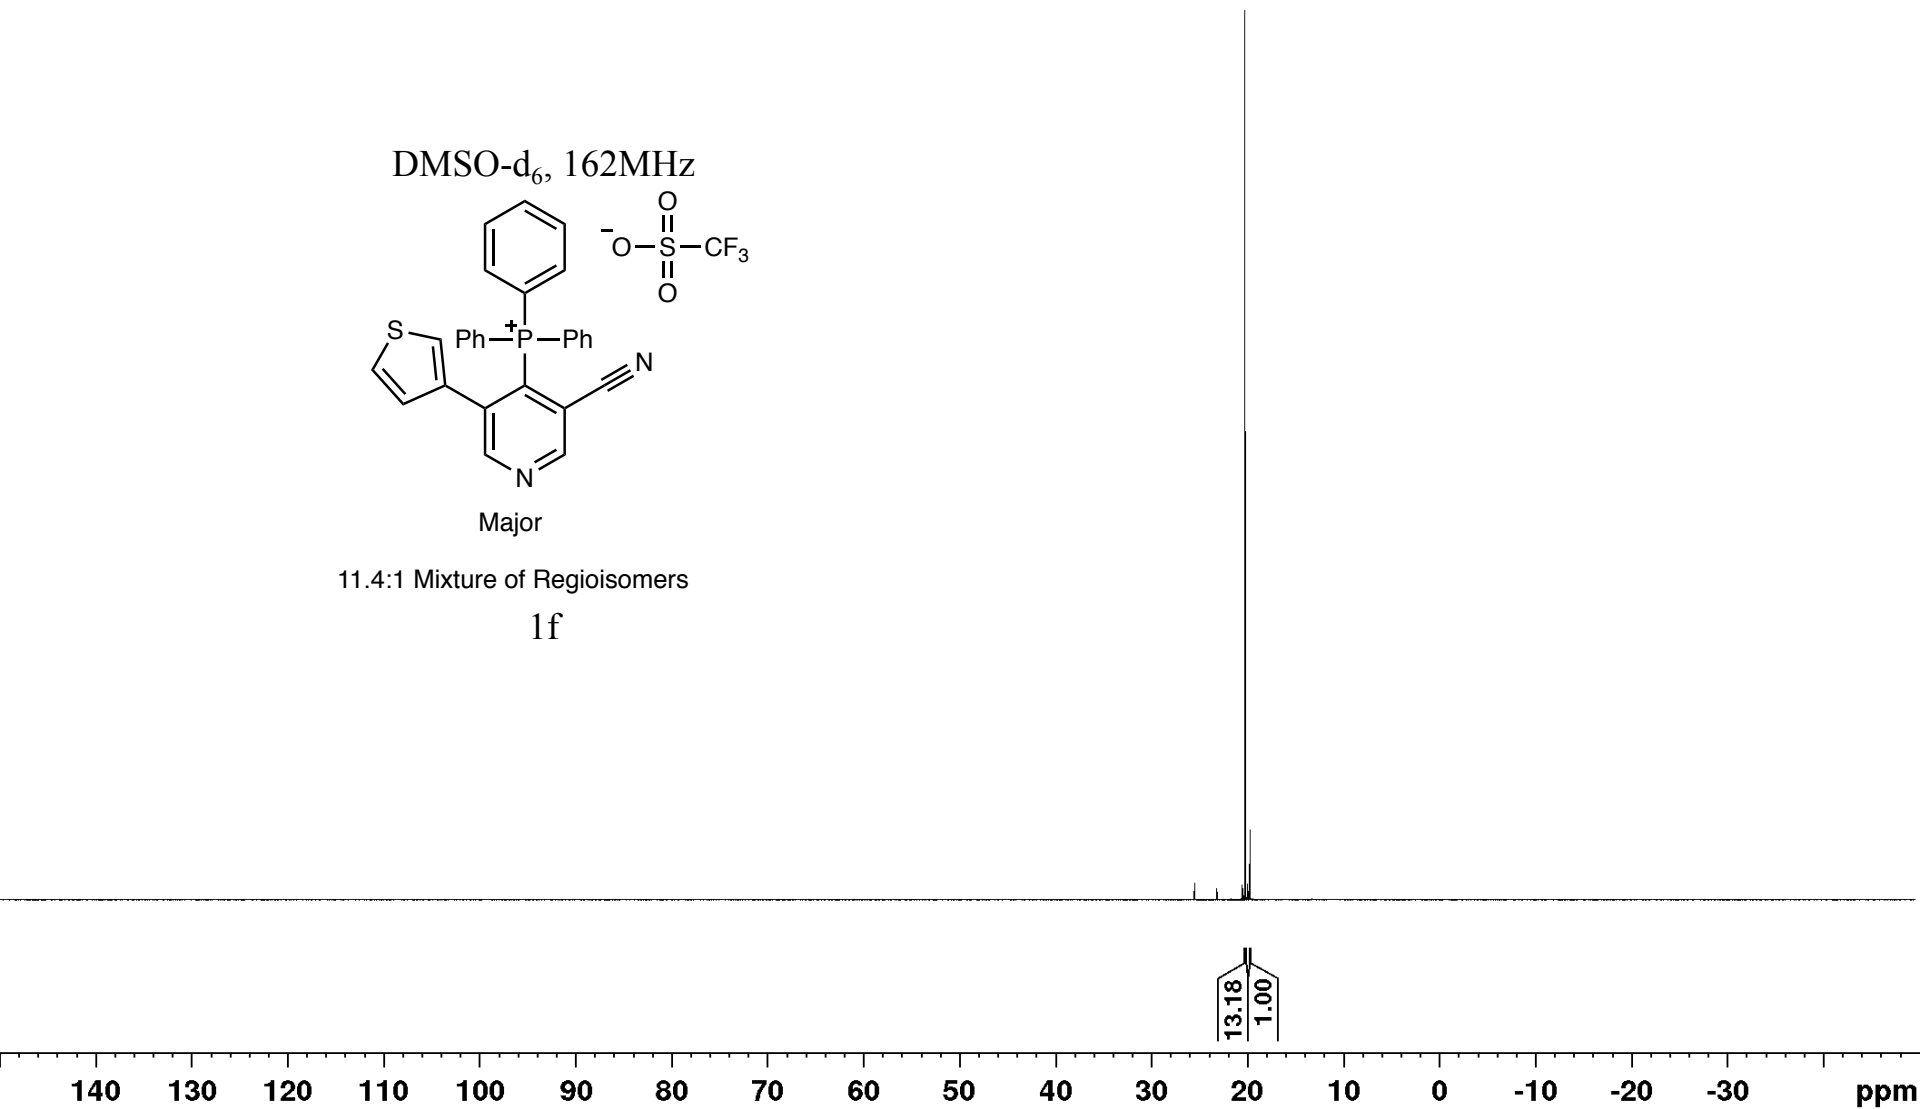

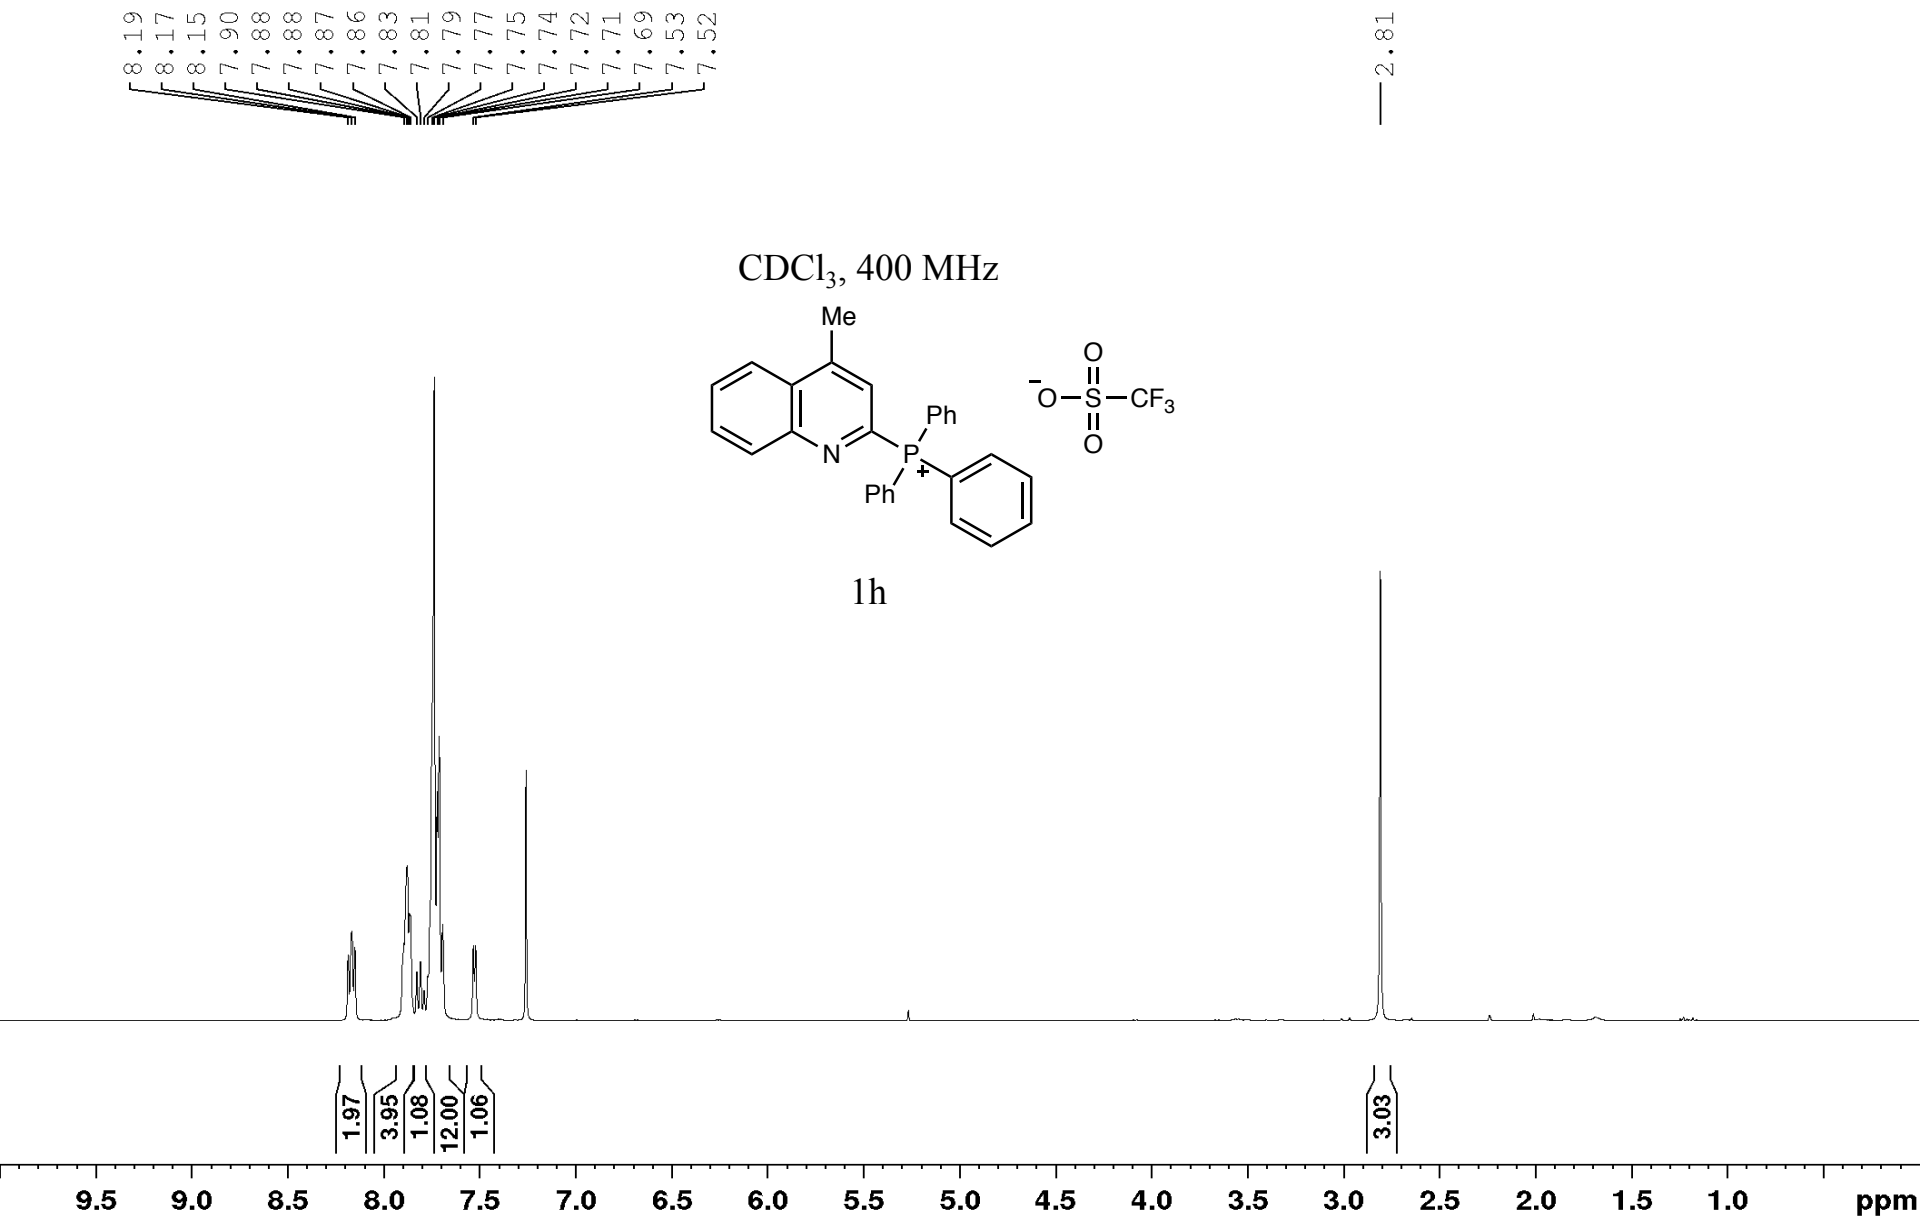

CDCl<sub>3</sub>, 100 MHz

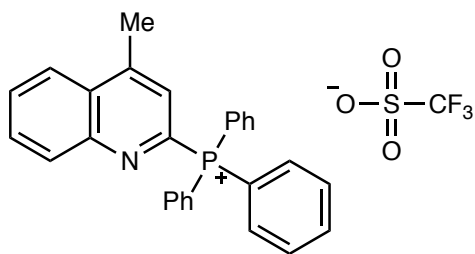

1h

148.61  
148.57  
148.46  
148.38  
144.94  
143.77  
135.64  
135.61  
134.65  
134.55  
131.63  
130.64  
130.62  
130.55  
130.42  
130.39  
128.78  
128.75  
125.28  
125.01  
124.44  
124.42  
122.43  
119.23  
117.74  
116.86

77.32  
77.20  
77.00  
76.68

19.19  
19.18

200 192 184 176 168 160 152 144 136 128 120 112 104 96 88 80 72 64 56 48 40 32 24 16 ppm

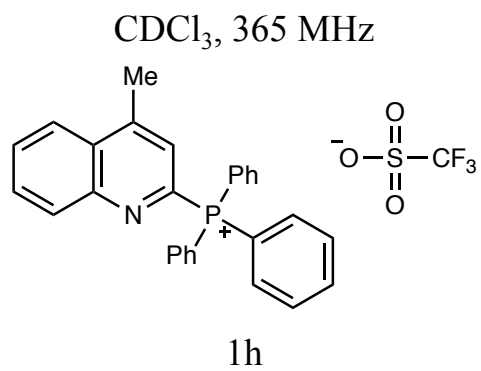

-78.07

10 0 -10 -20 -30 -40 -50 -60 -70 -80 -90 -100 -110 -120 -130 -140 -150 -160 -170 -180 ppm



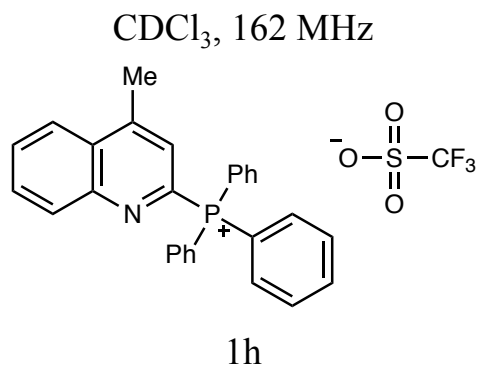

14.41

140 130 120 110 100 90 80 70 60 50 40 30 20 10 0 -10 -20 -30 ppm

8.83  
8.81  
7.91  
7.89  
7.88  
7.80  
7.78  
7.77  
7.76  
7.75  
7.73  
7.72  
7.70

2.15

CDCl<sub>3</sub>, 400 MHz

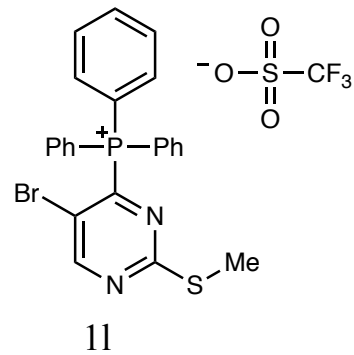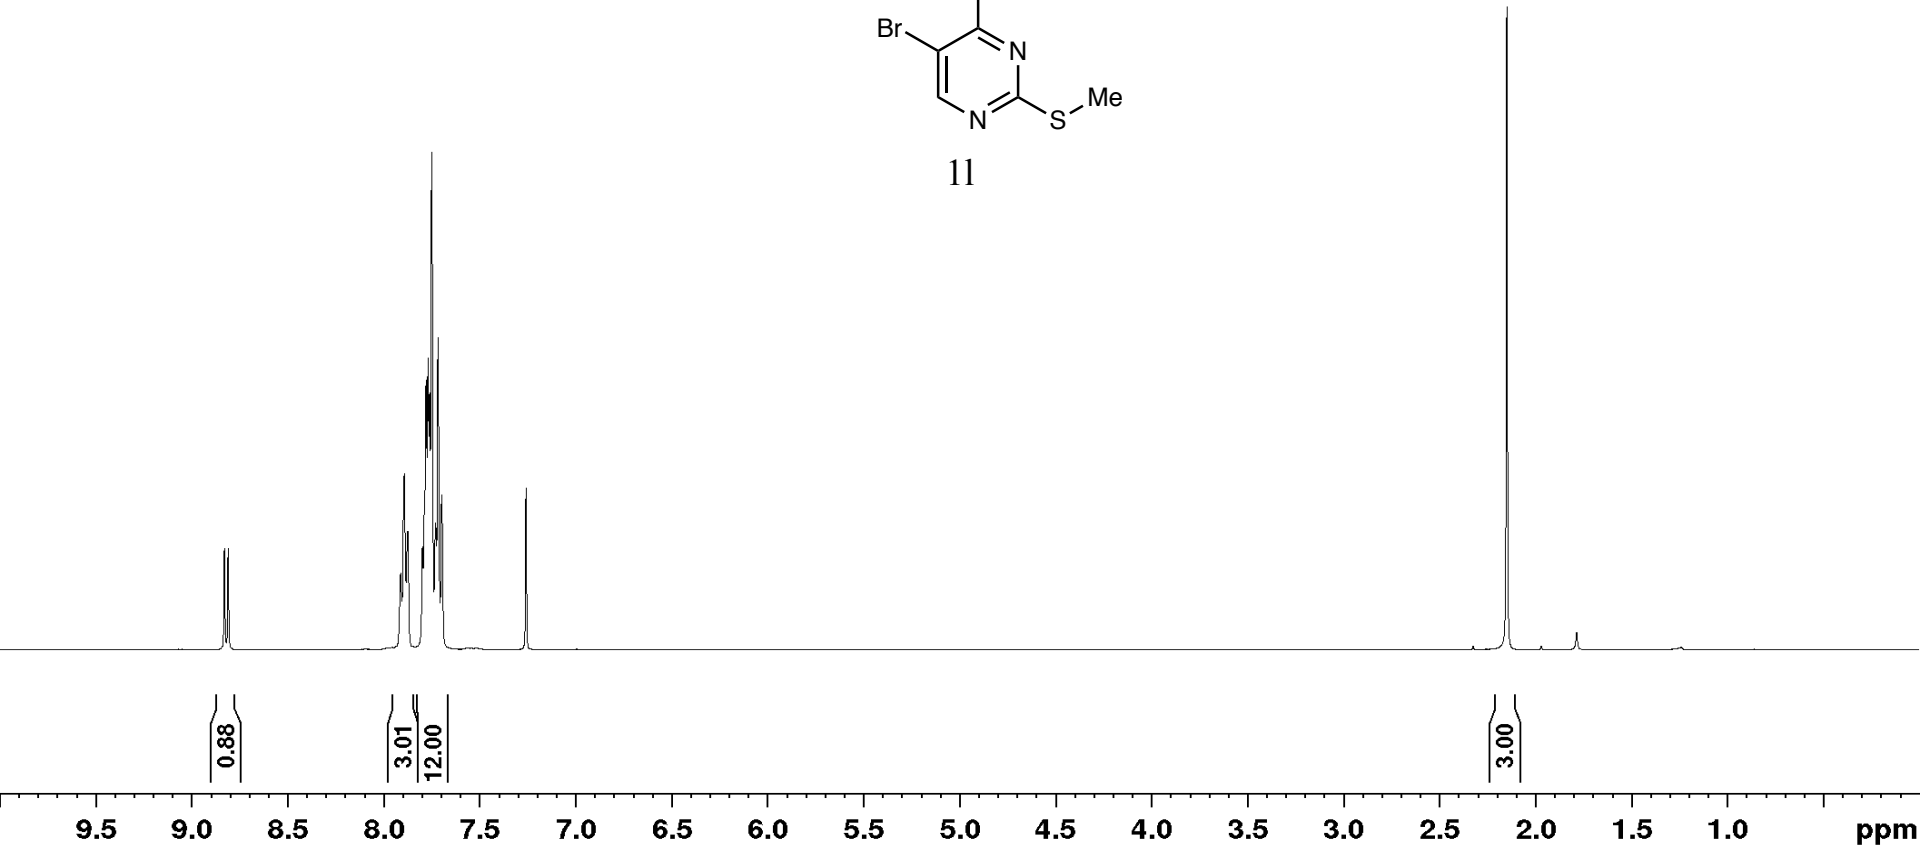

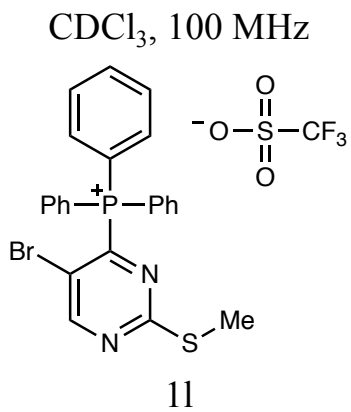

173.94  
173.77

162.00  
161.96

152.06  
150.88

136.07  
136.04  
134.81  
134.70

130.80  
130.67

122.46  
120.94  
120.77

119.27  
115.44  
114.55

77.32  
77.20  
77.00  
76.68

14.43

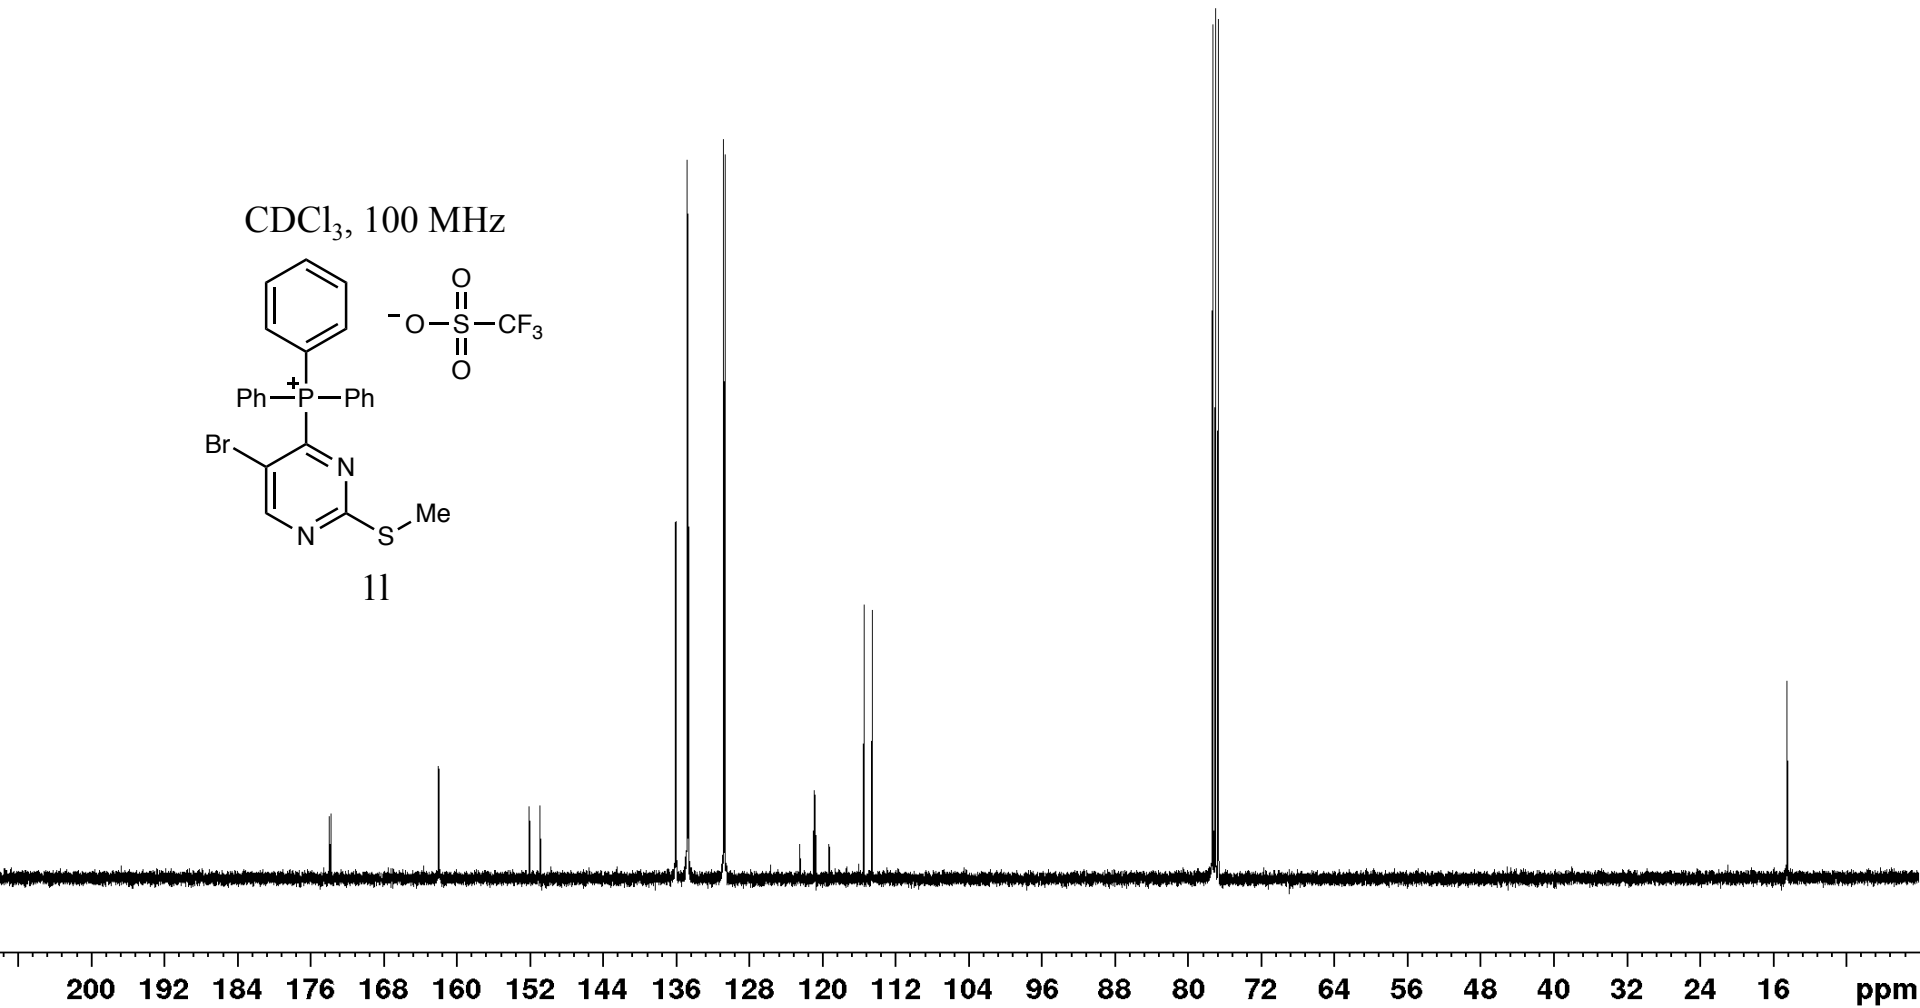

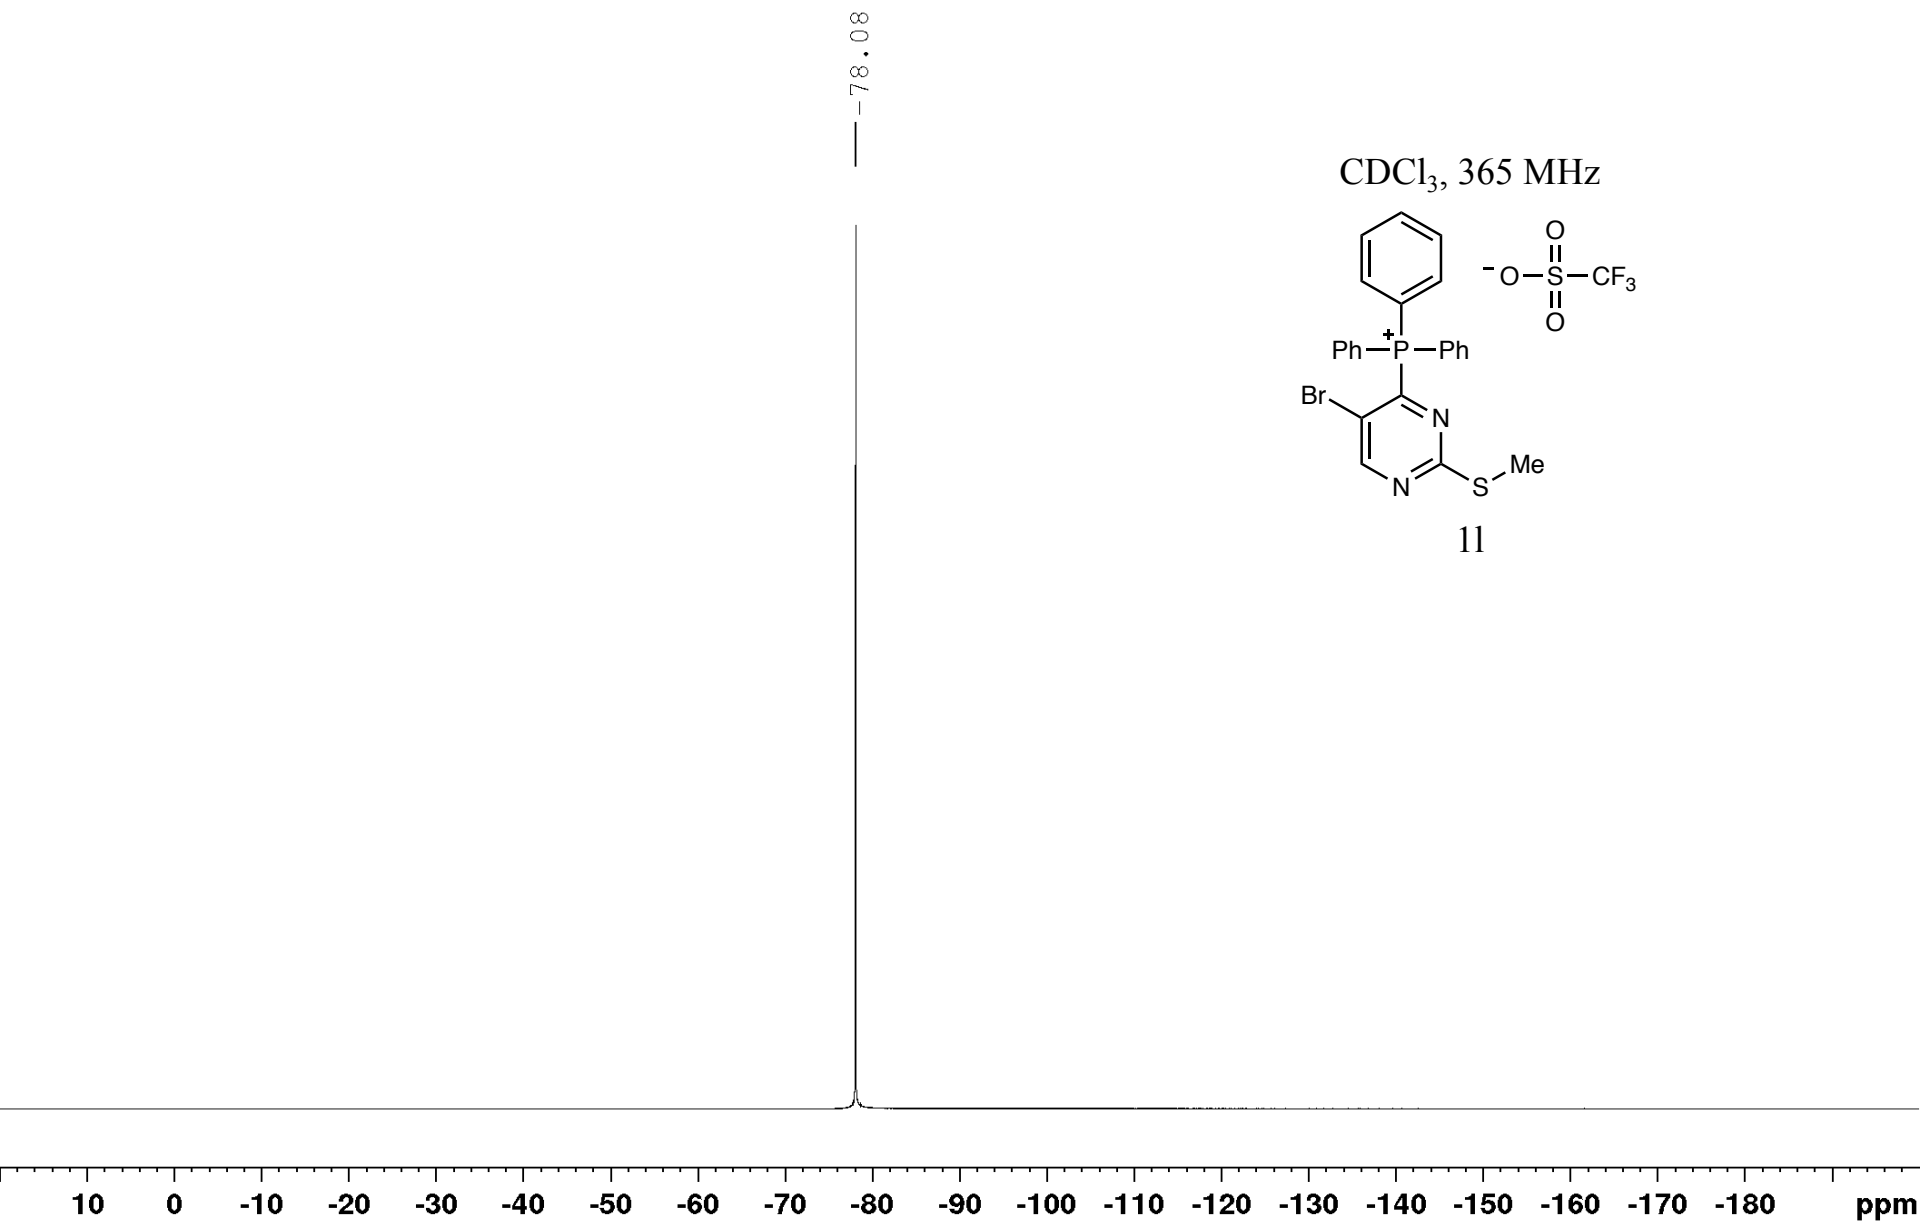

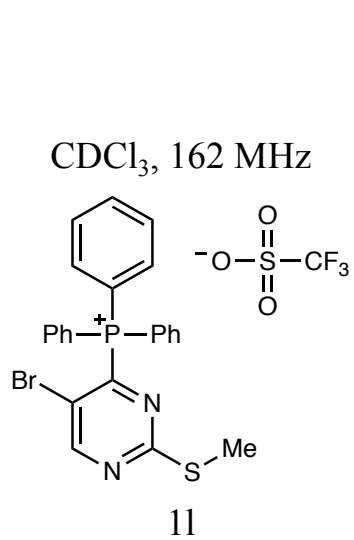

24.37

140 130 120 110 100 90 80 70 60 50 40 30 20 10 0 -10 -20 -30 ppm

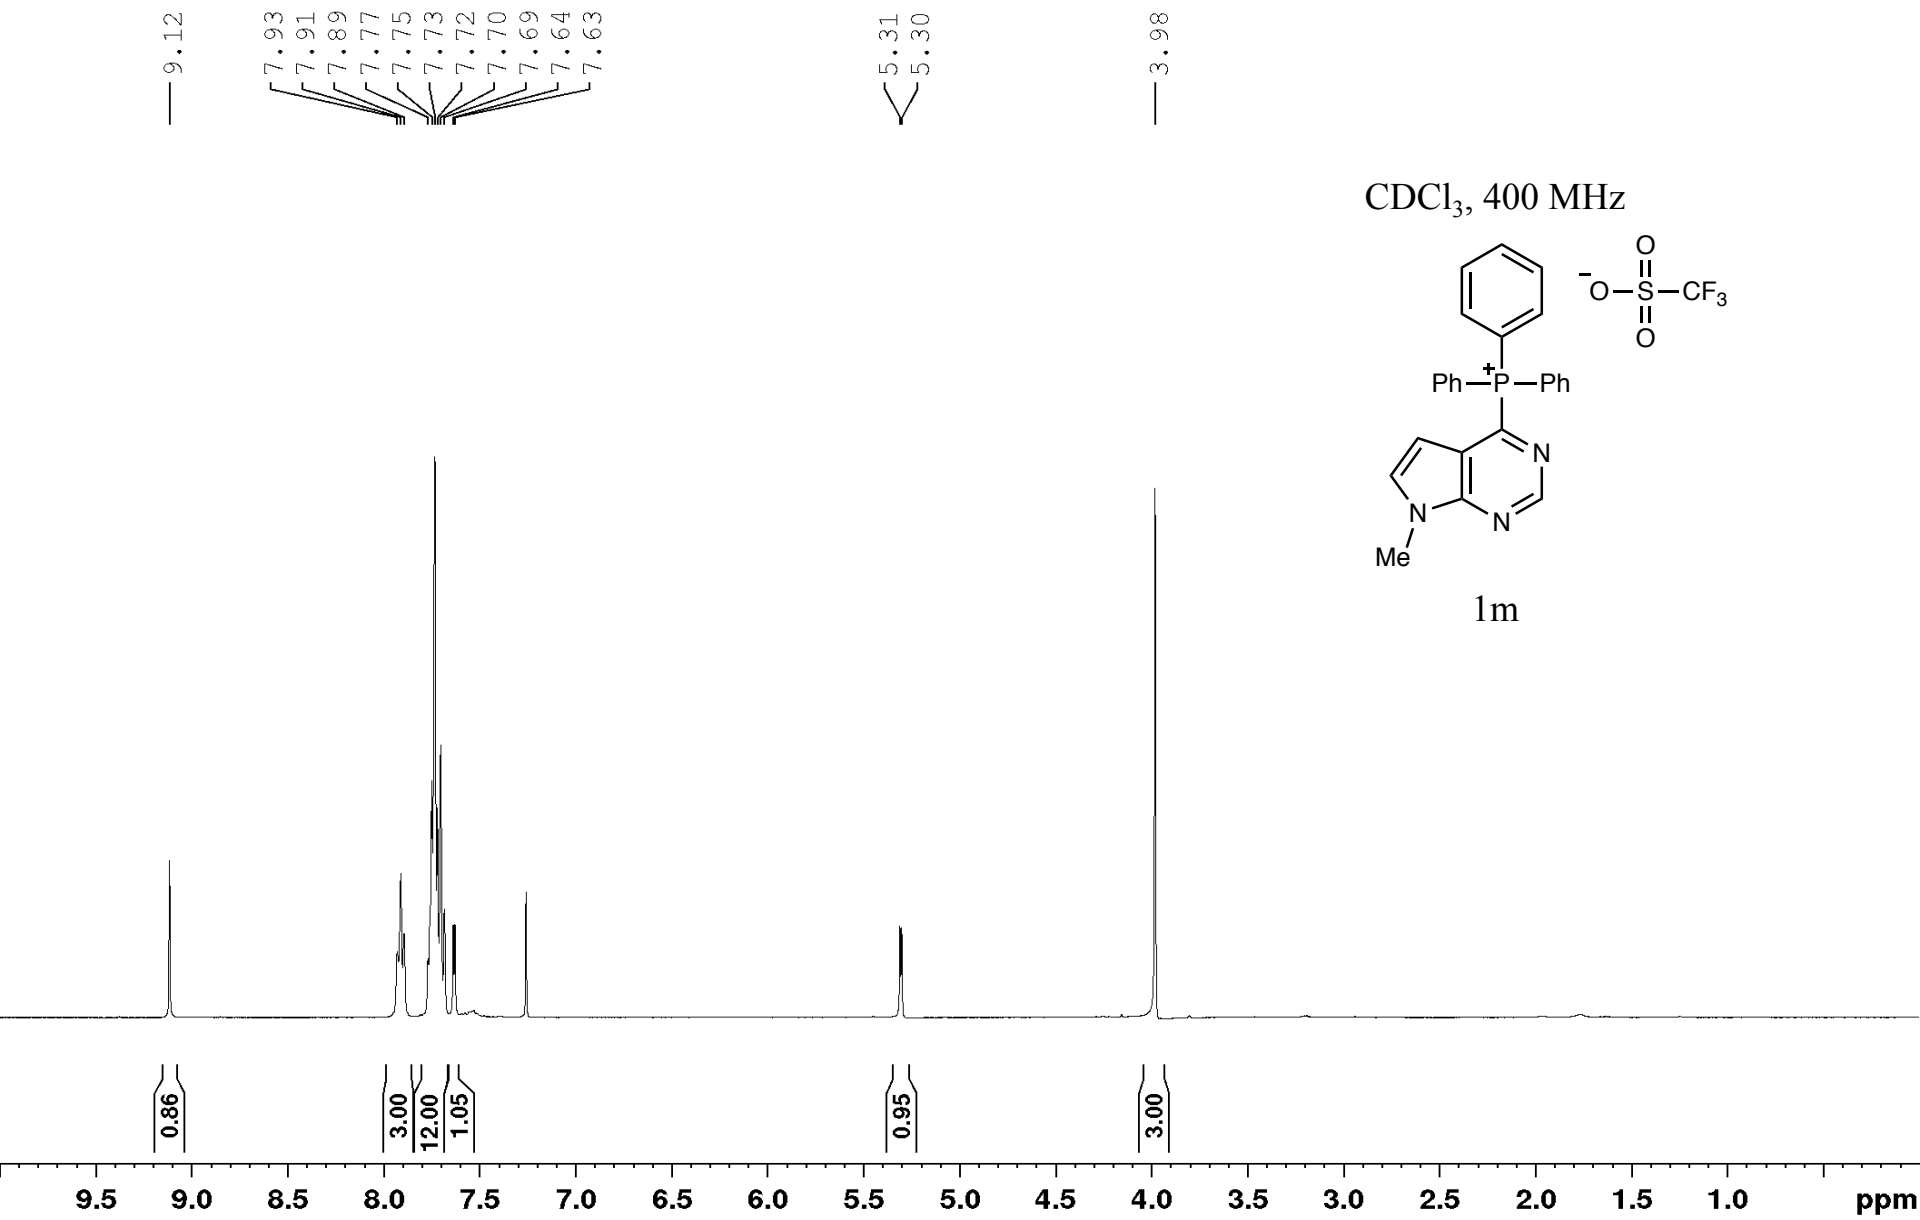

CDCl<sub>3</sub>, 100 MHz

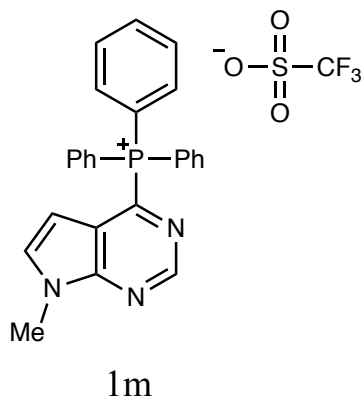

151.68  
151.59  
150.72  
150.53  
142.67  
141.48  
136.55  
136.06  
136.03  
134.88  
134.78  
130.70  
130.57  
123.62  
123.37  
122.48  
119.29  
117.11  
116.23  
— 98.28  
77.32  
77.20  
77.00  
76.68  
— 31.65

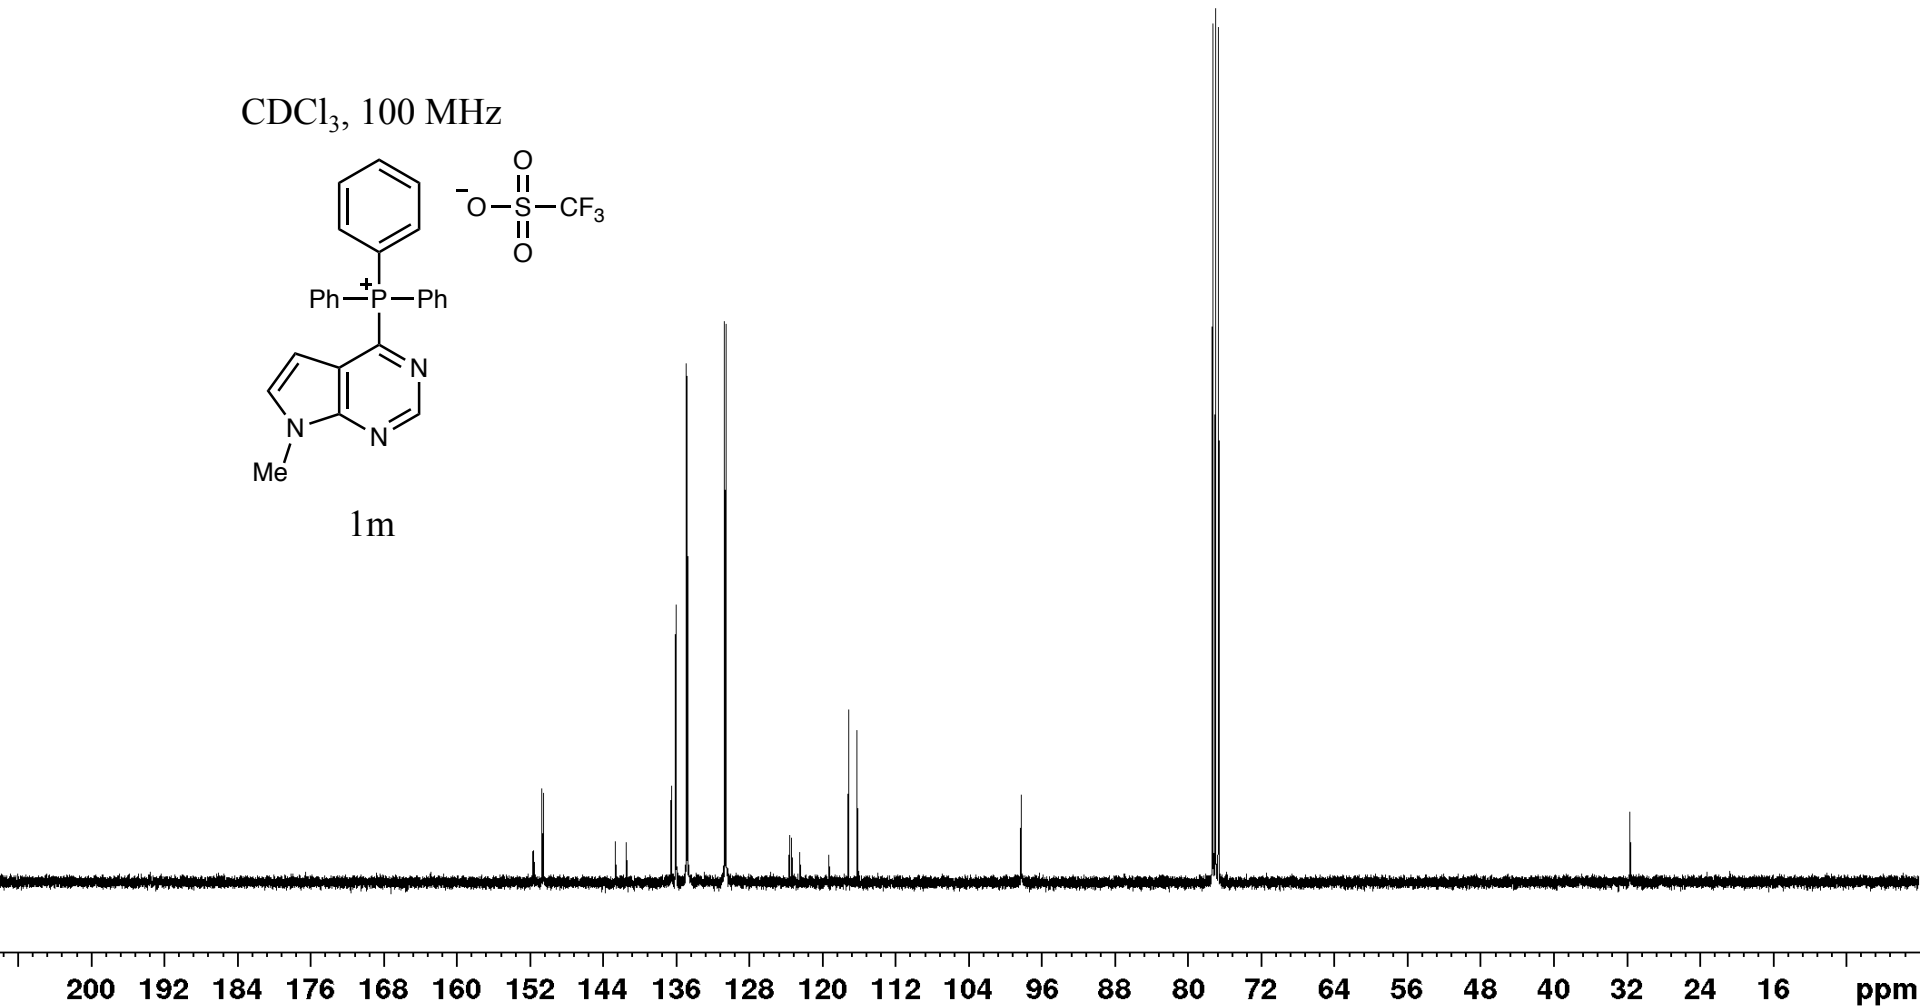

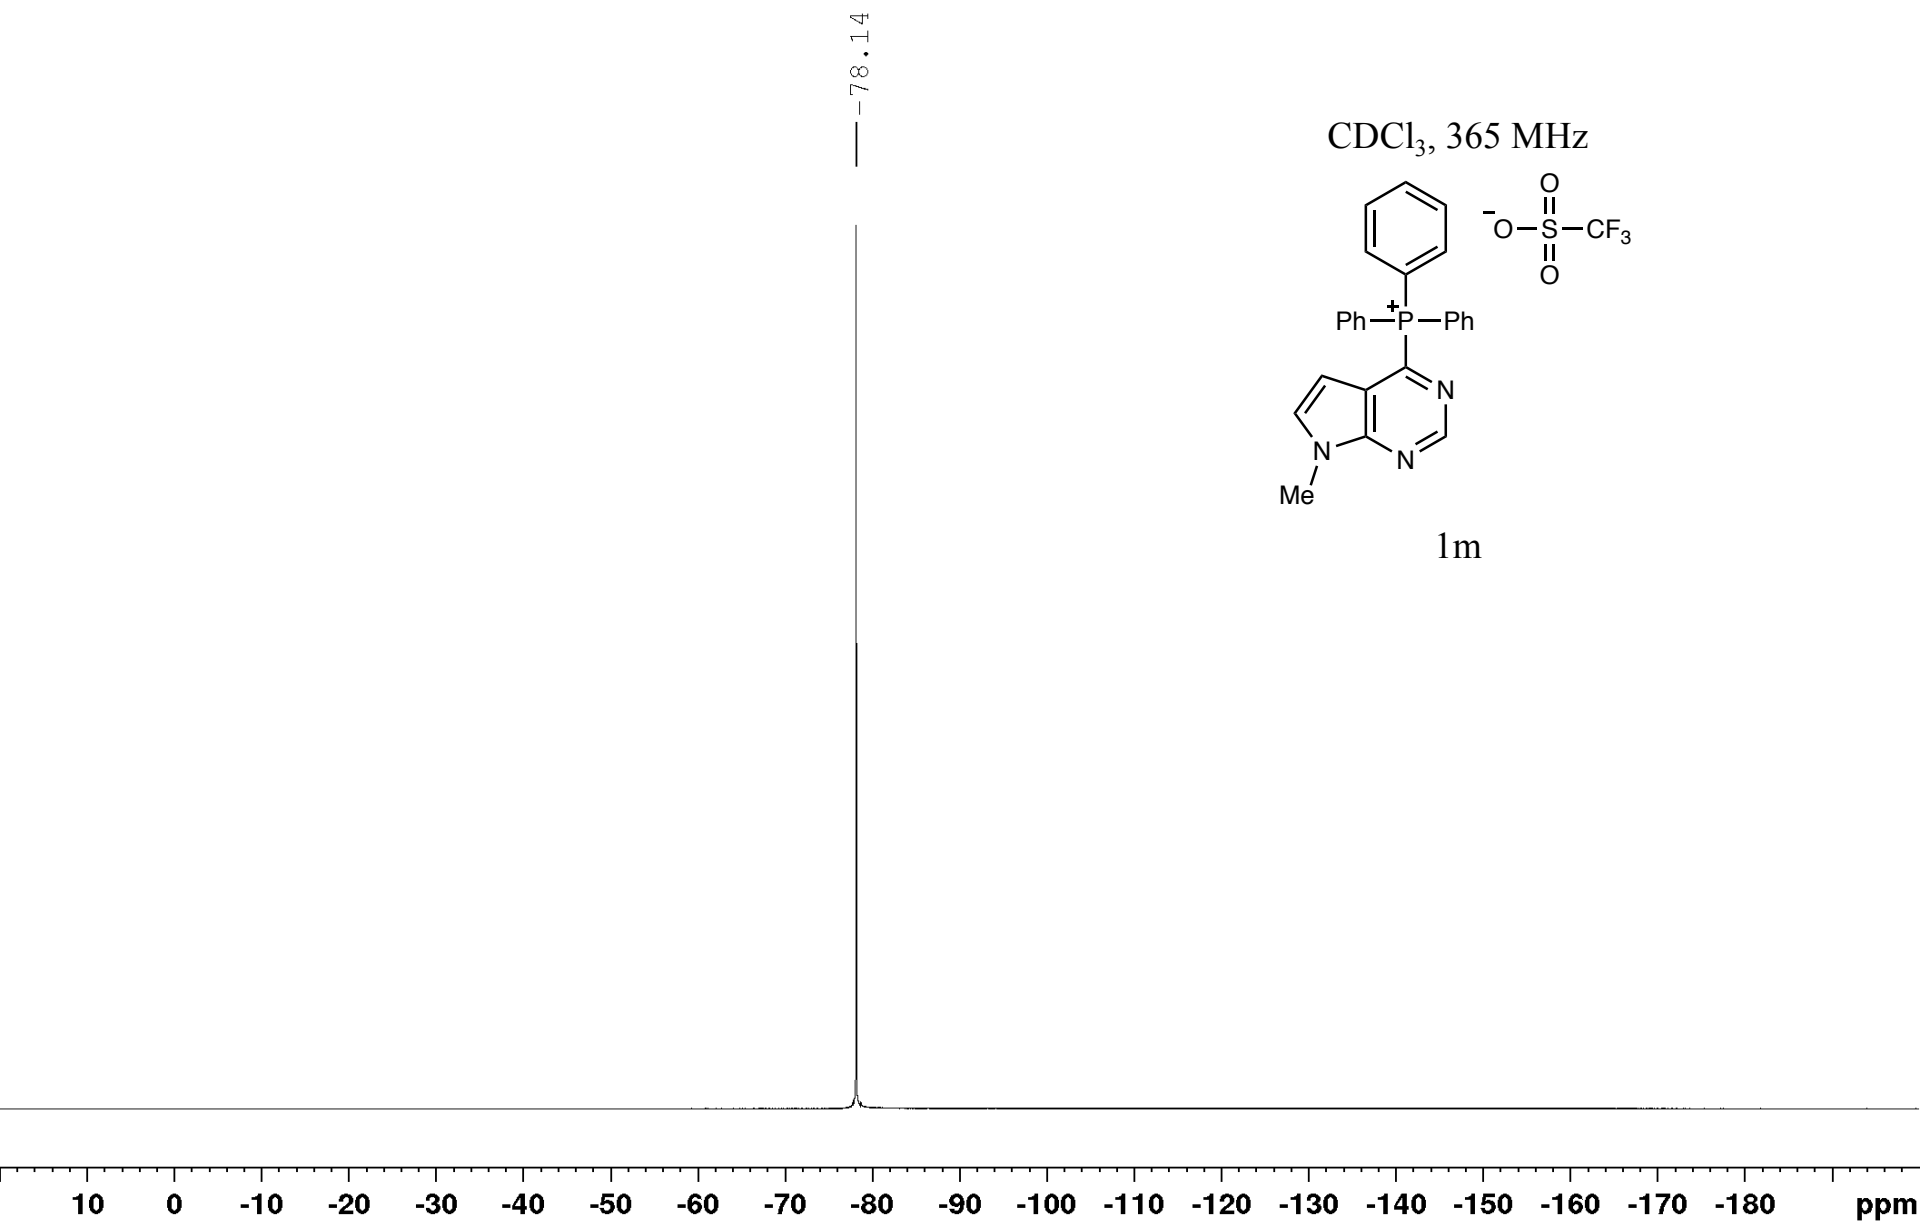



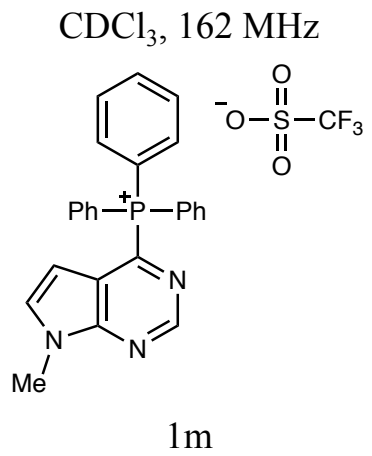

—13.29

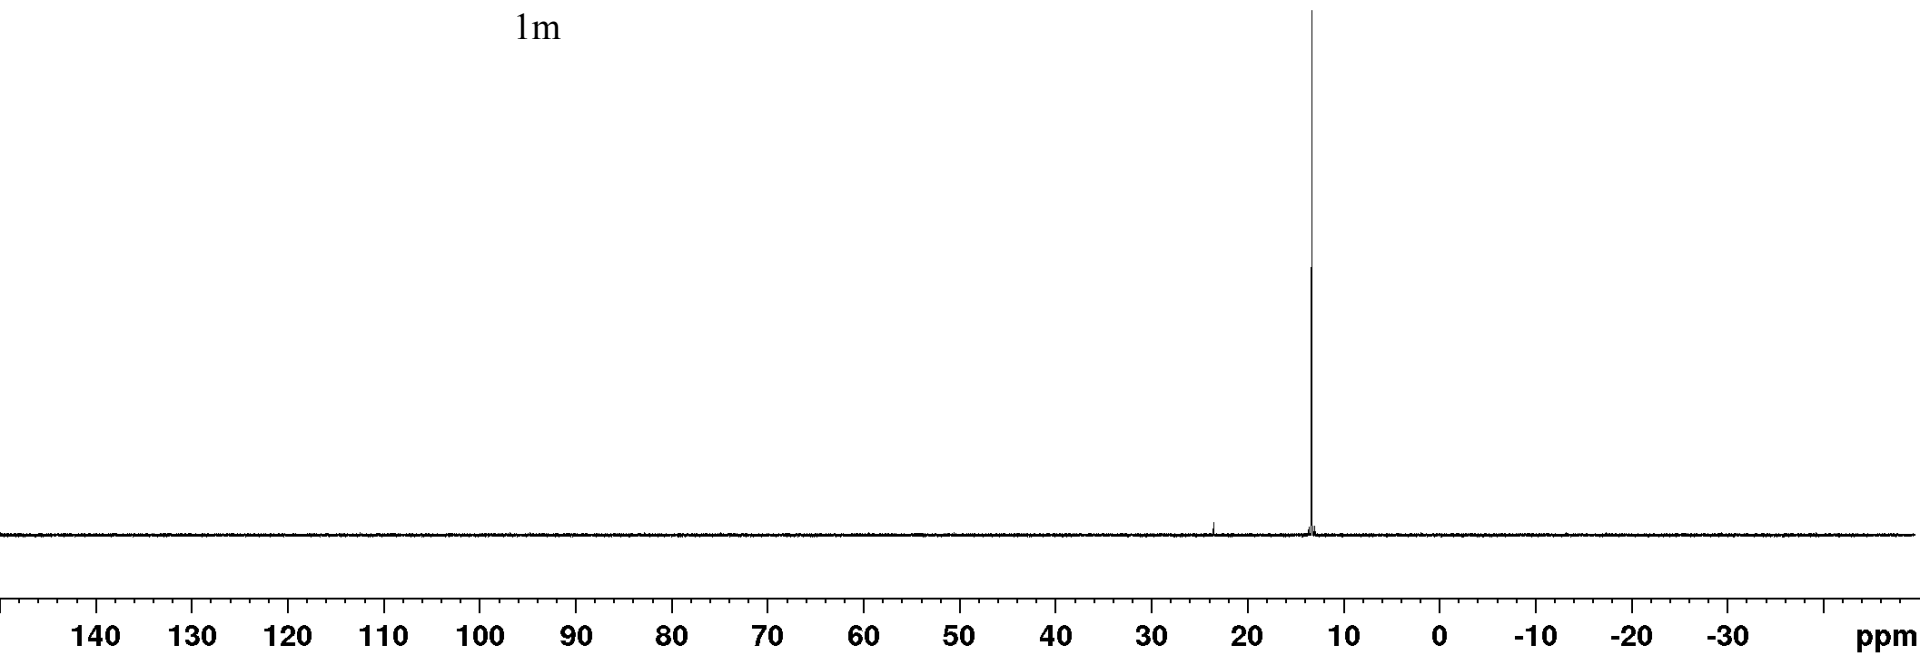

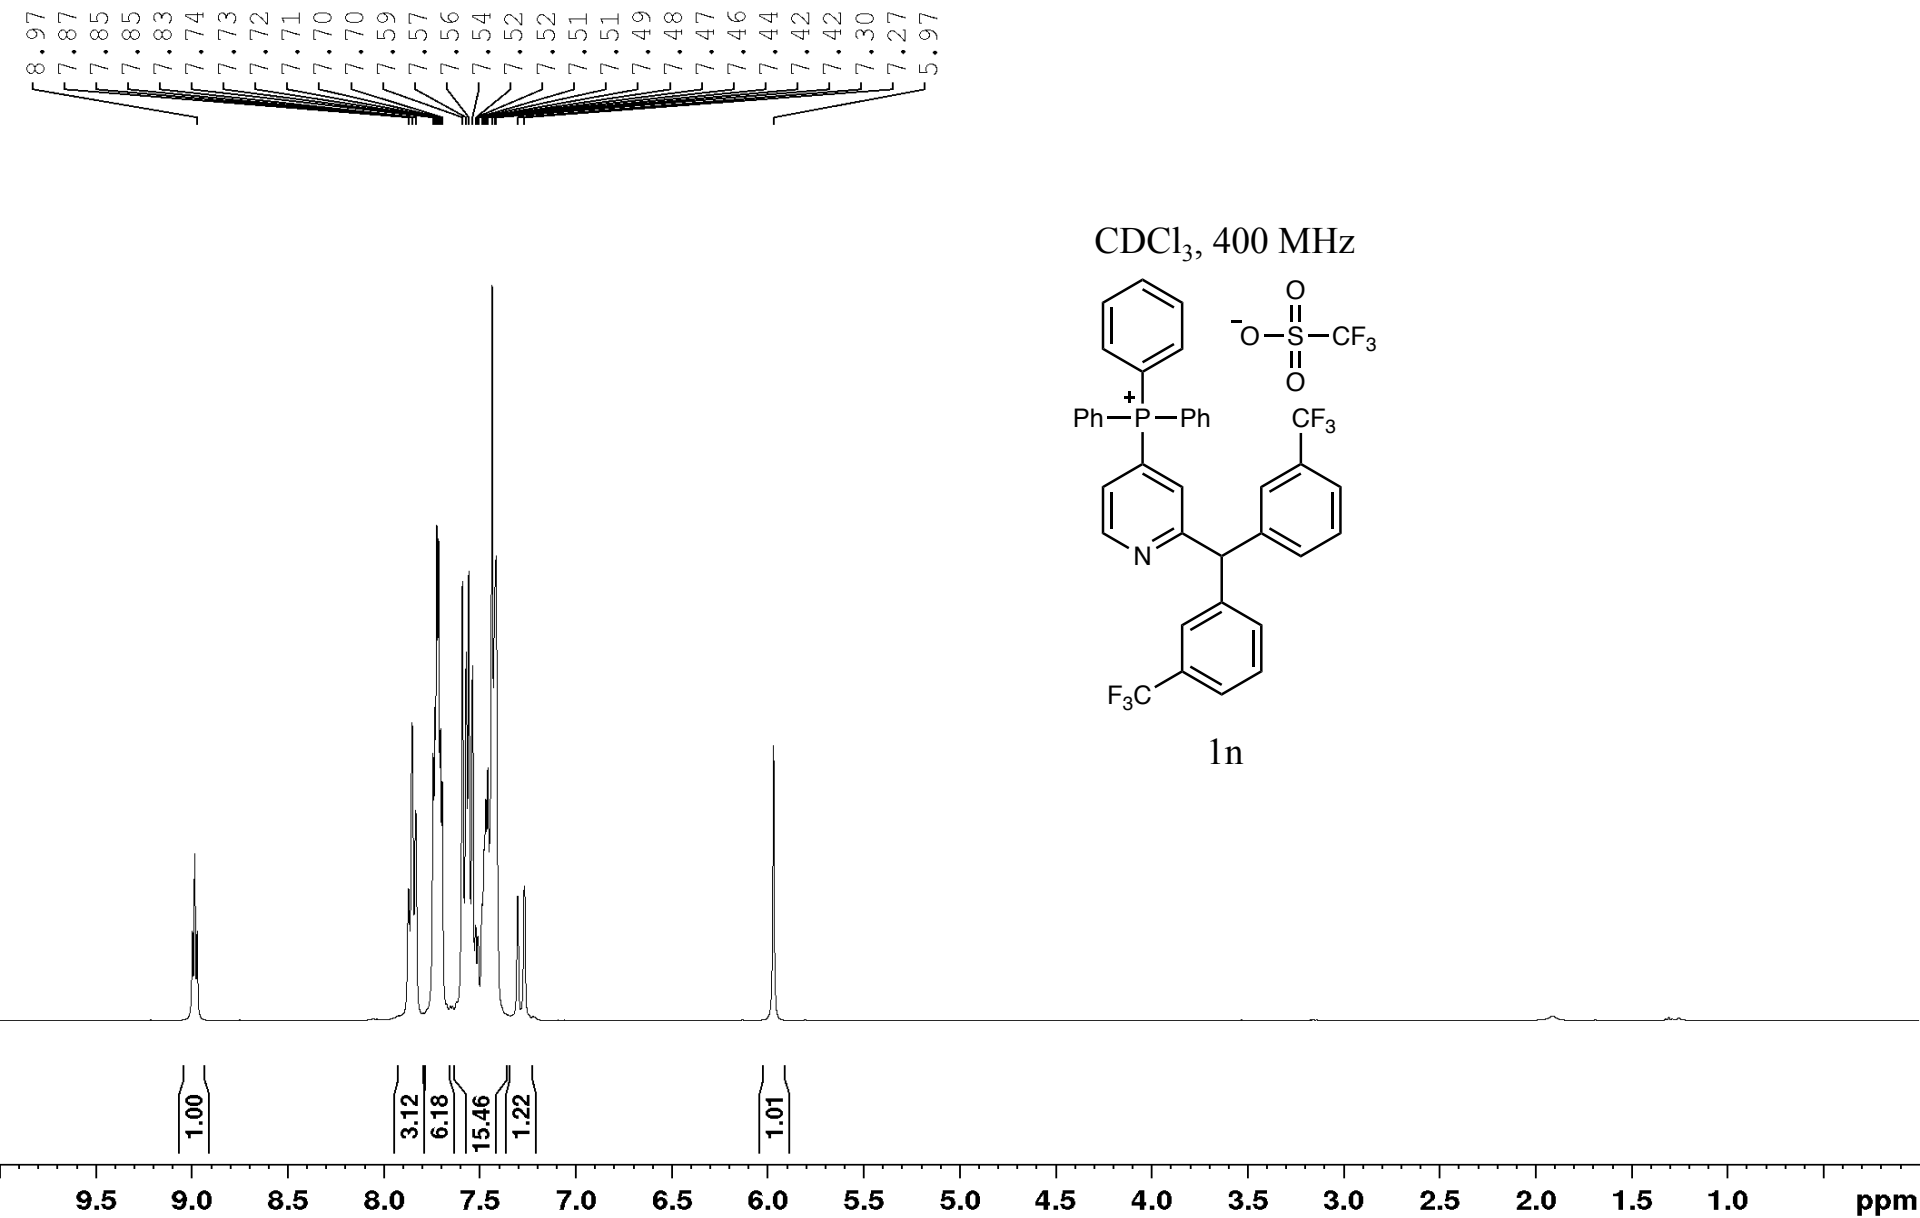

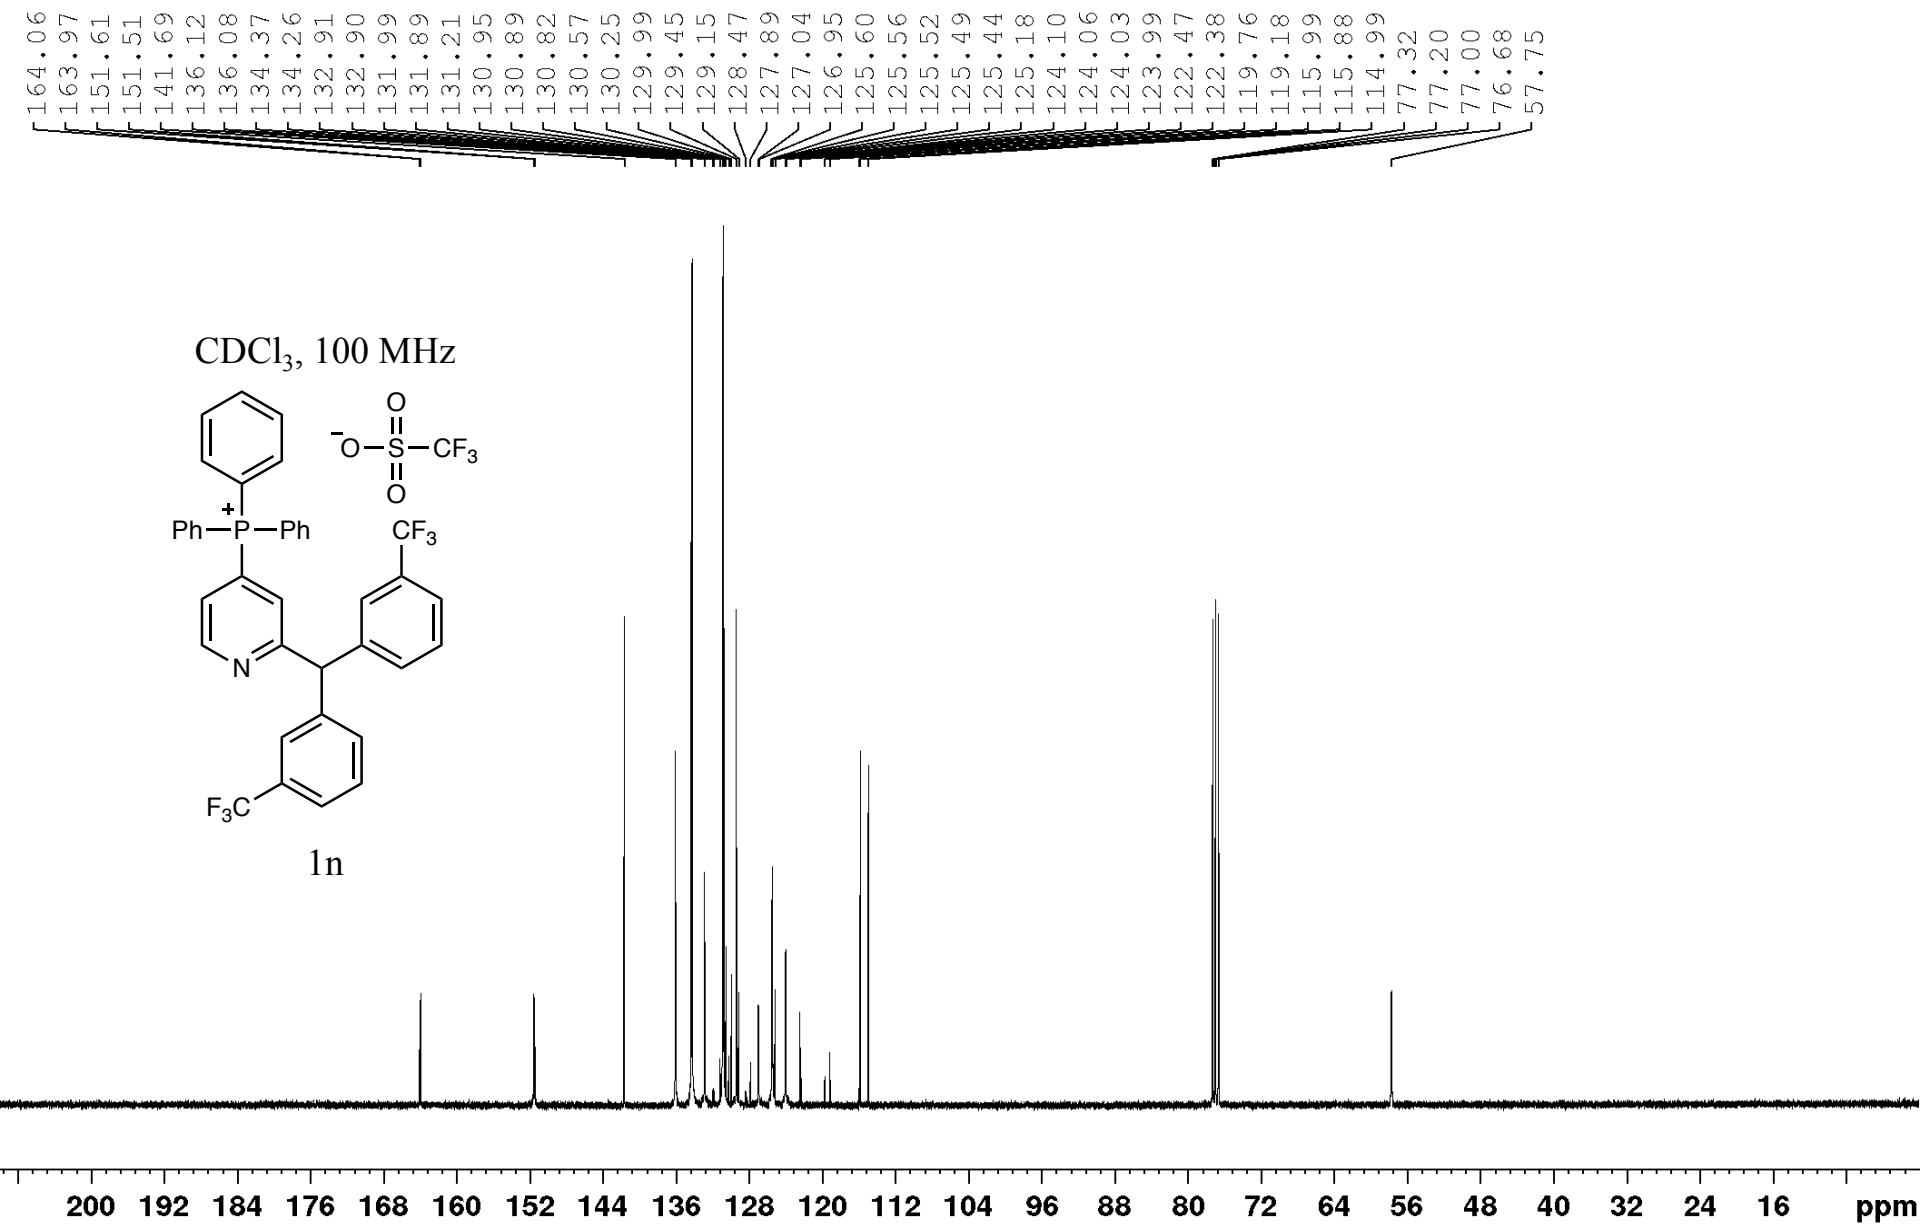

CDCl<sub>3</sub>, 162 MHz

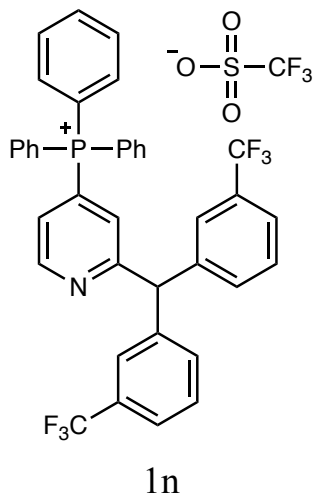

— 22.38

140 130 120 110 100 90 80 70 60 50 40 30 20 10 0 -10 -20 -30 ppm

CDCl<sub>3</sub>, 365 MHz

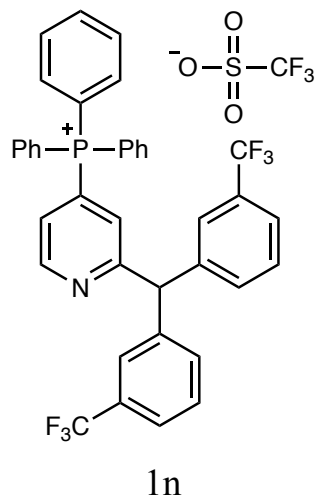

— -62.46

— -78.13

10 0 -10 -20 -30 -40 -50 -60 -70 -80 -90 -100 -110 -120 -130 -140 -150 -160 -170 -180 ppm

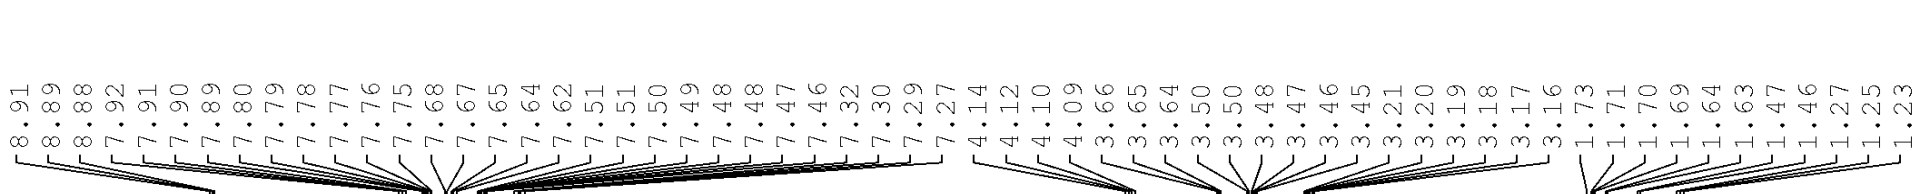

CDCl<sub>3</sub>, 400 MHz

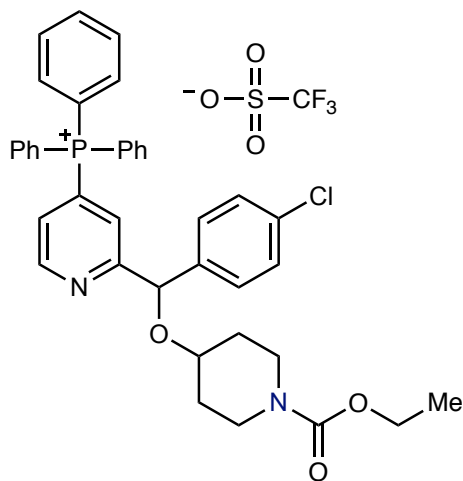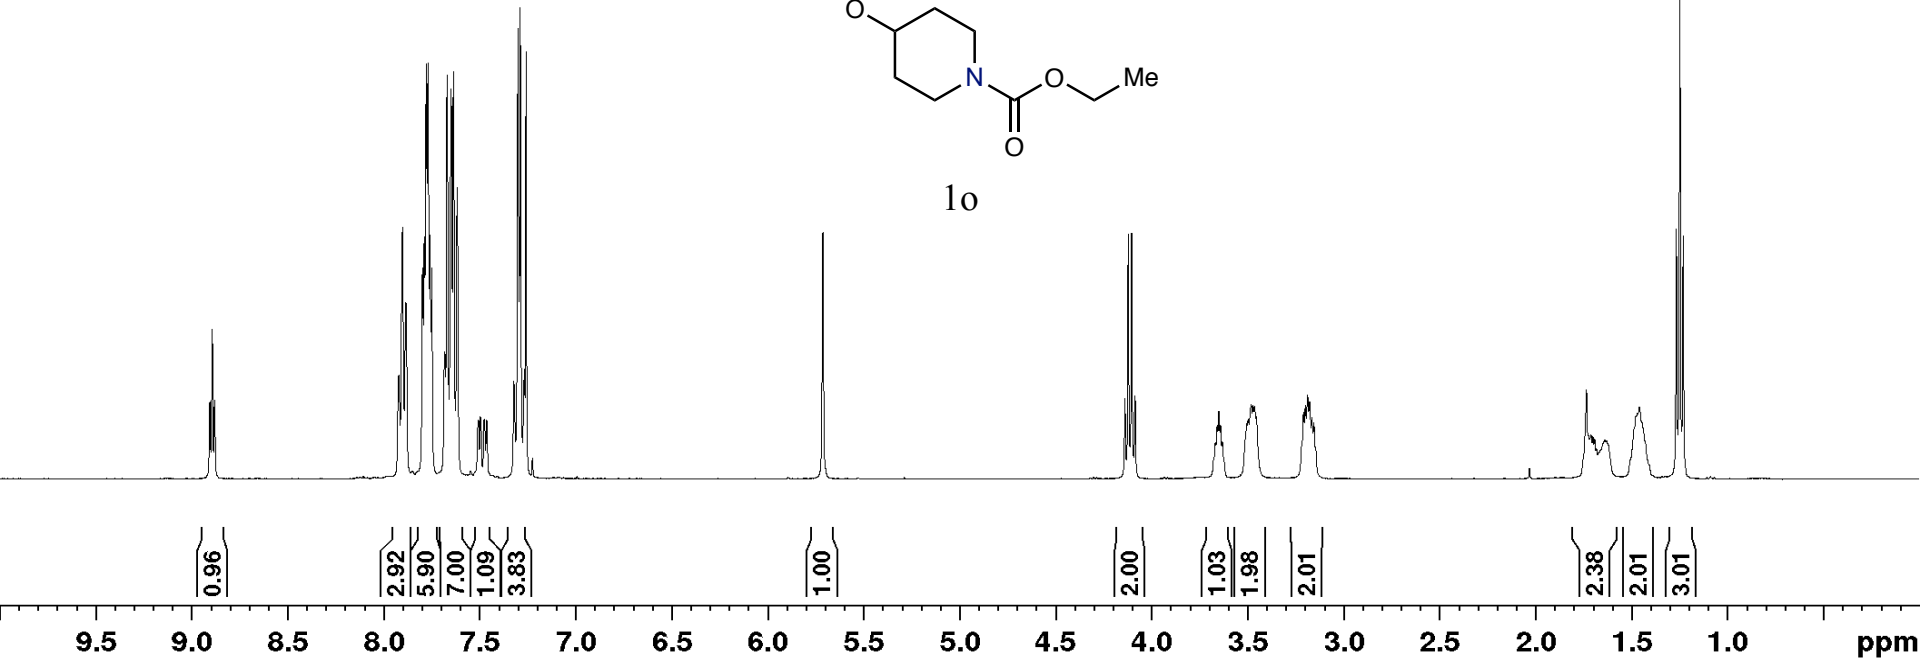

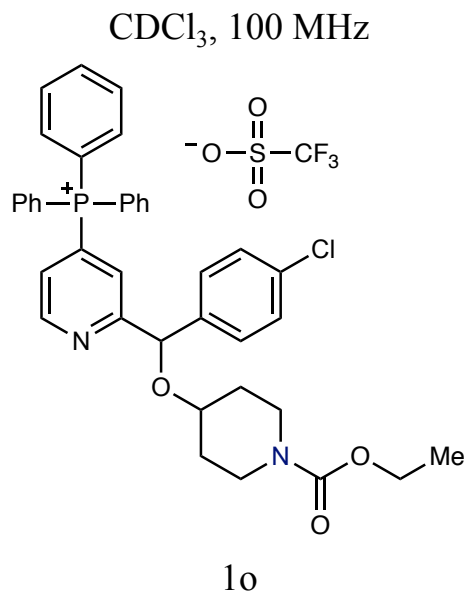

164.42  
164.33  
155.43  
151.16  
151.05  
138.68  
136.17  
136.14  
134.58  
134.48  
134.32  
134.01  
131.02  
130.89  
129.70  
128.87  
128.81  
128.47  
125.96  
125.88  
123.90  
123.81  
122.43  
119.24  
116.24  
115.35  
79.94  
77.32  
77.20  
77.00  
76.88  
76.68  
72.82  
— 61.29

< 40.69  
< 40.66  
< 31.29  
< 30.35

— 14.68

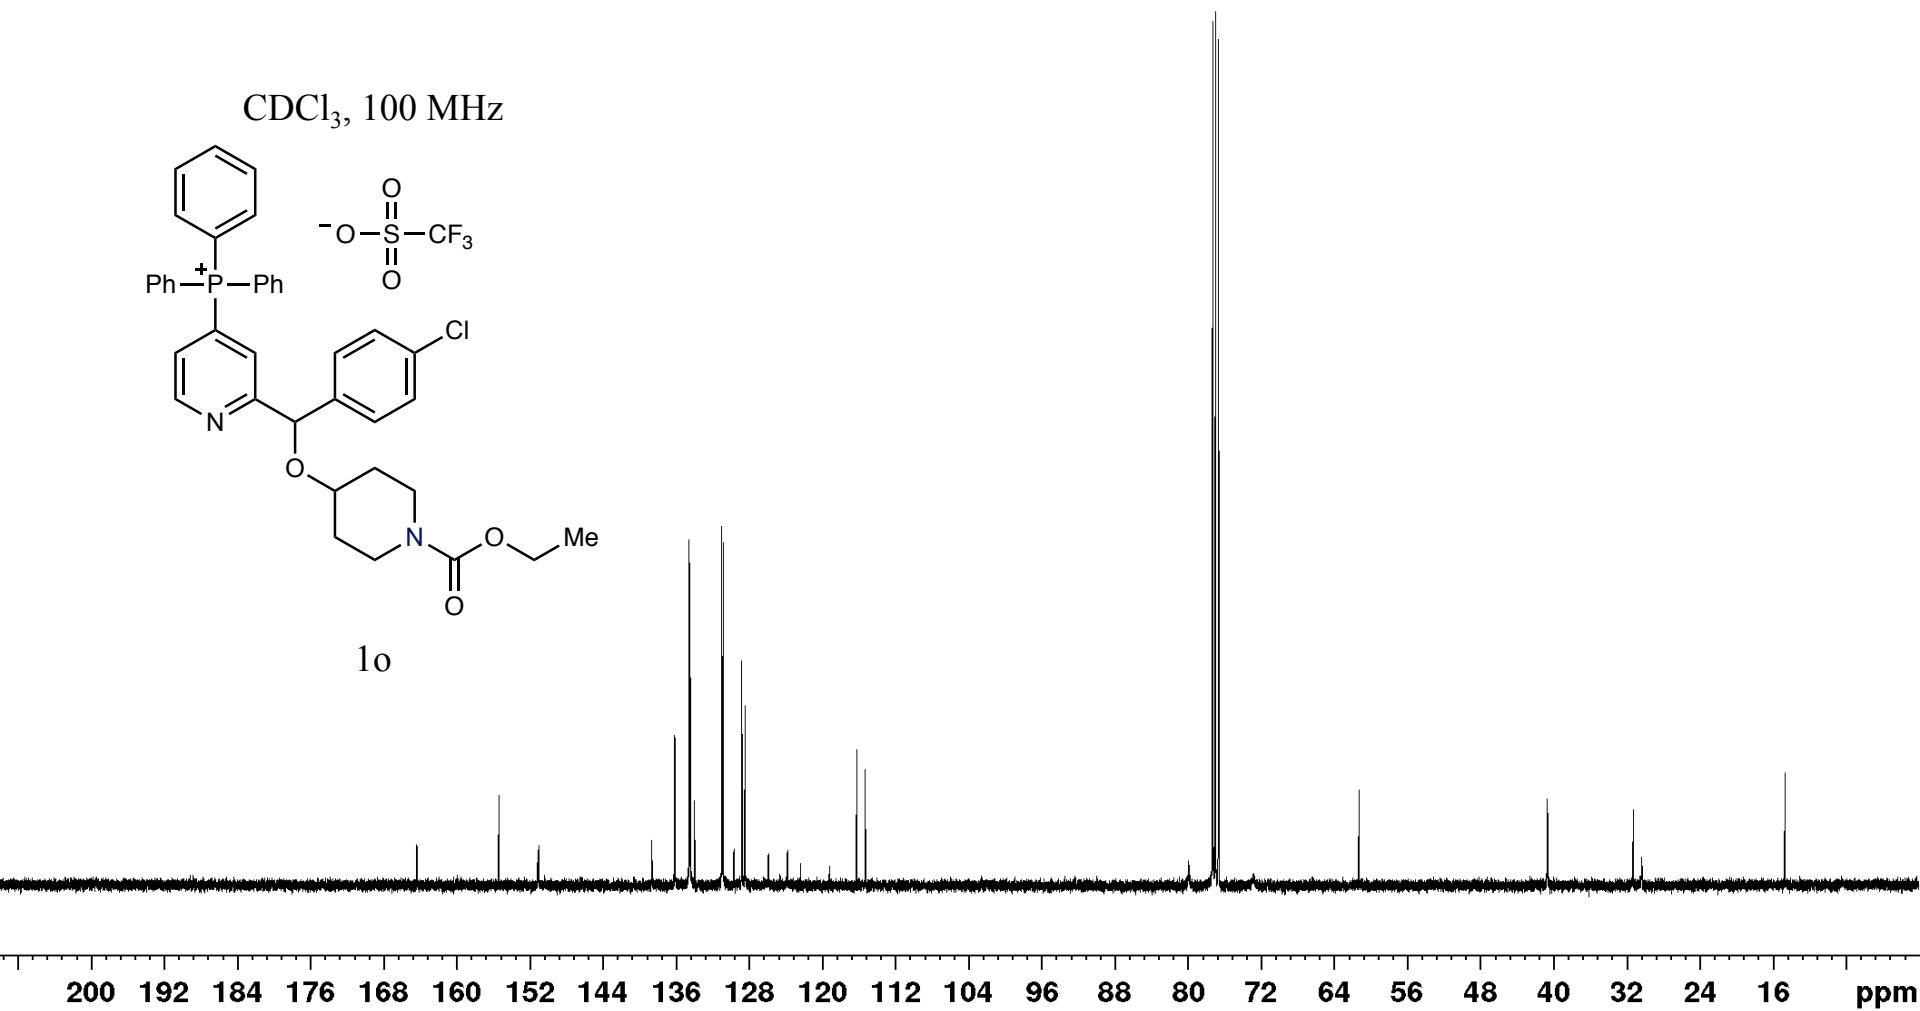

— -78.15

CDCl<sub>3</sub>, 365 MHz

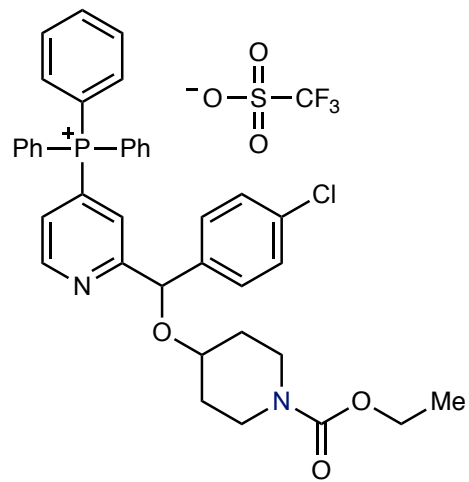

10

10 0 -10 -20 -30 -40 -50 -60 -70 -80 -90 -100 -110 -120 -130 -140 -150 -160 -170 -180 ppm



CDCl<sub>3</sub>, 162 MHz

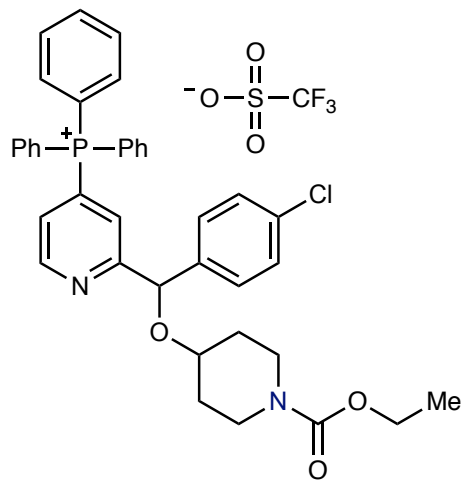

10

— 22.67

140 130 120 110 100 90 80 70 60 50 40 30 20 10 0 -10 -20 -30 ppm

8.92  
8.91  
8.90  
8.89  
7.87  
7.85  
7.85  
7.83  
7.83  
7.73  
7.72  
7.71  
7.70  
7.70  
7.69  
7.67  
7.66  
7.64  
7.62  
7.49  
7.26

4.45  
4.23  
4.21  
4.19  
4.11  
4.10  
4.09  
4.08

— 3.29

1.91  
1.85  
1.79  
1.78  
1.76  
1.35

CDCl<sub>3</sub>, 400 MHz

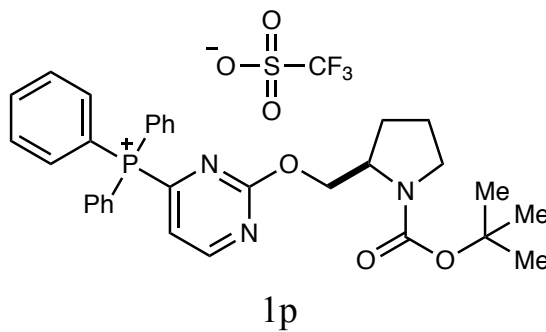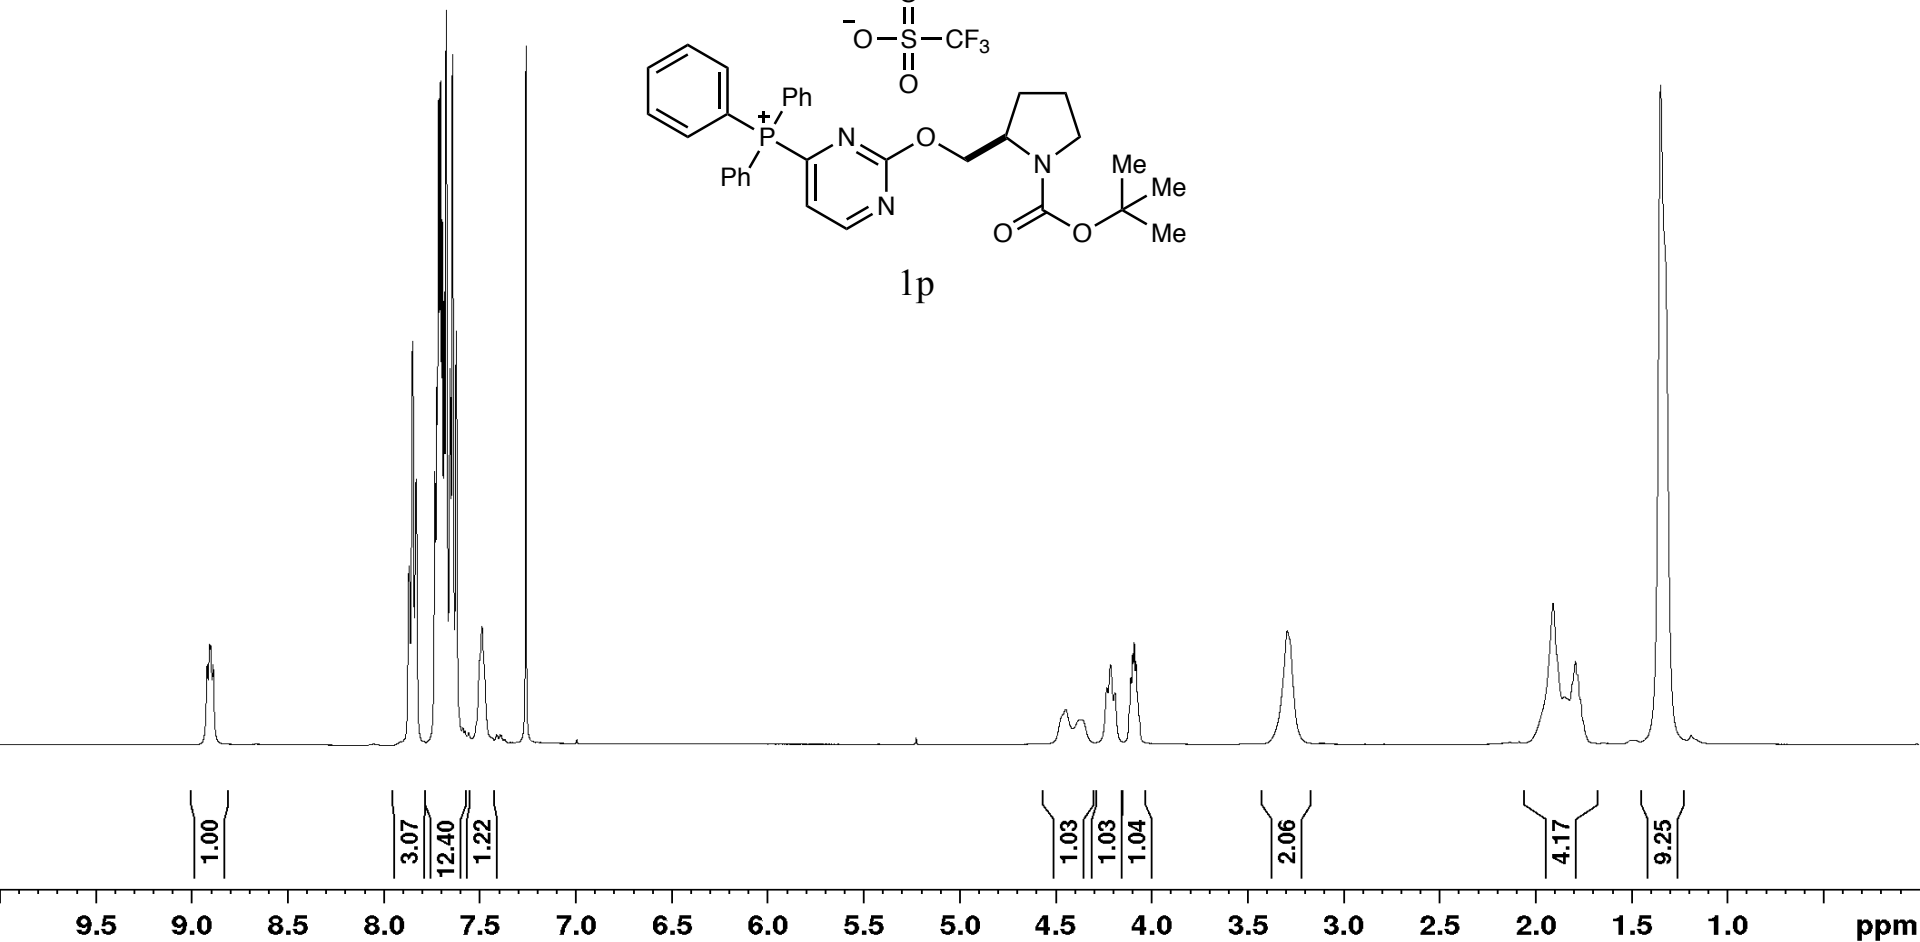

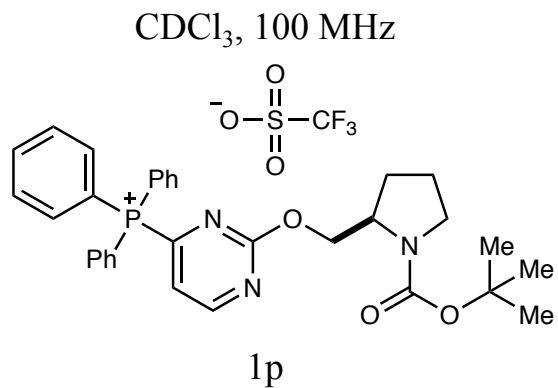

165.16  
164.97  
163.20  
163.11  
156.11  
155.30  
154.99  
154.41  
154.15  
135.99  
135.96  
134.64  
134.53  
130.63  
130.50  
125.39  
122.20  
121.53  
121.34  
119.00  
115.81  
115.49  
114.61  
79.38  
79.19  
77.32  
77.19  
77.00  
76.68  
68.93  
68.55  
— 55.20  
46.64  
46.23  
28.47  
27.76  
23.47  
22.71

208 200 192 184 176 168 160 152 144 136 128 120 112 104 96 88 80 72 64 56 48 40 32 24 16 8 0 ppm

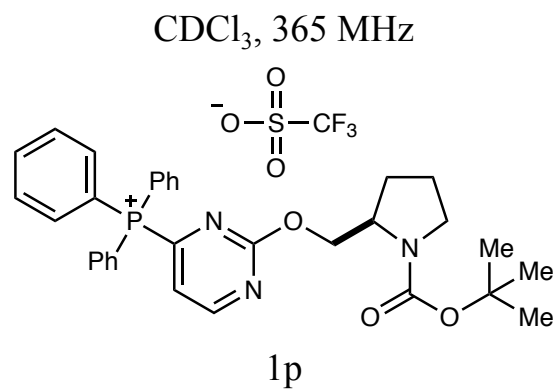

— -78.17

10 0 -10 -20 -30 -40 -50 -60 -70 -80 -90 -100 -110 -120 -130 -140 -150 -160 -170 -180 ppm

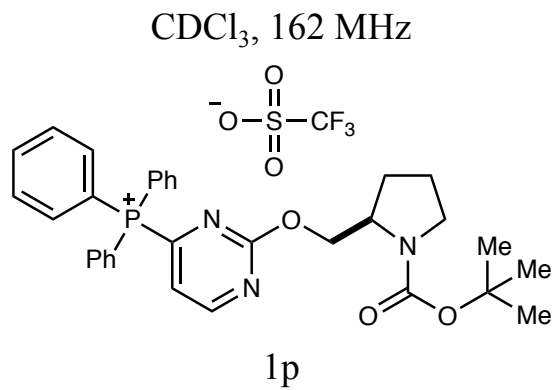

— 16.10

140 130 120 110 100 90 80 70 60 50 40 30 20 10 0 -10 -20 -30 ppm

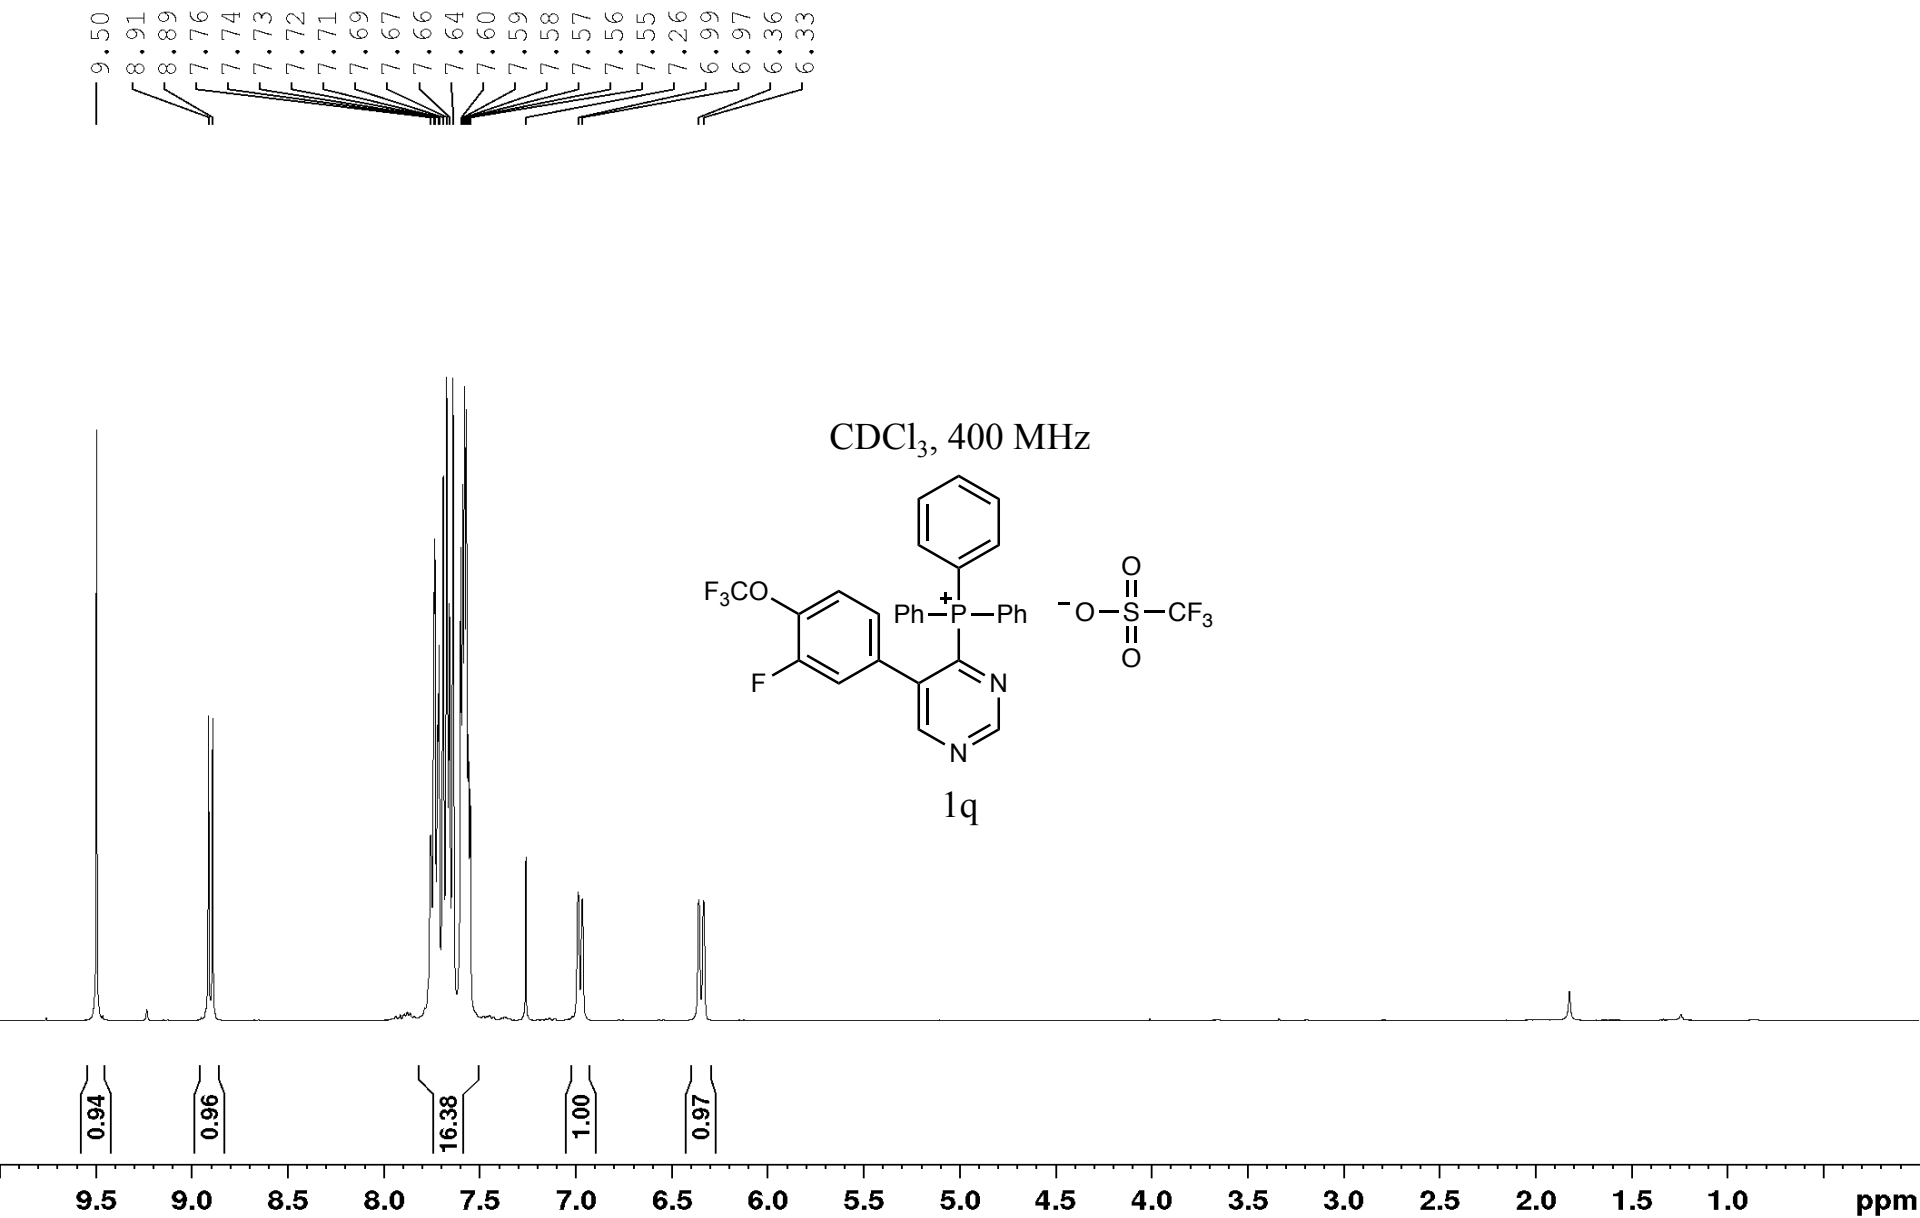

161.98  
159.44  
157.81  
157.64  
156.97  
152.26  
151.12  
150.81  
150.80  
150.70  
150.69  
135.27  
135.24  
135.04  
134.90  
134.80  
134.64  
134.56  
132.94  
132.92  
130.36  
130.23  
130.09  
129.99  
129.86  
129.68  
129.55  
125.33  
123.71  
122.14  
121.13  
118.95  
118.86  
118.71  
118.55  
117.36  
116.90  
116.02  
115.97  
115.76  
108.00  
107.74  
77.32  
77.20  
77.00  
76.68

CDCl<sub>3</sub>, 100 MHz

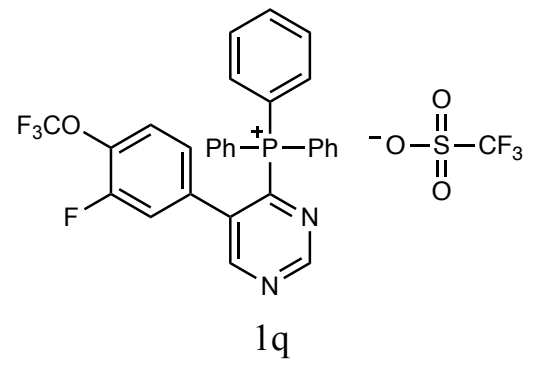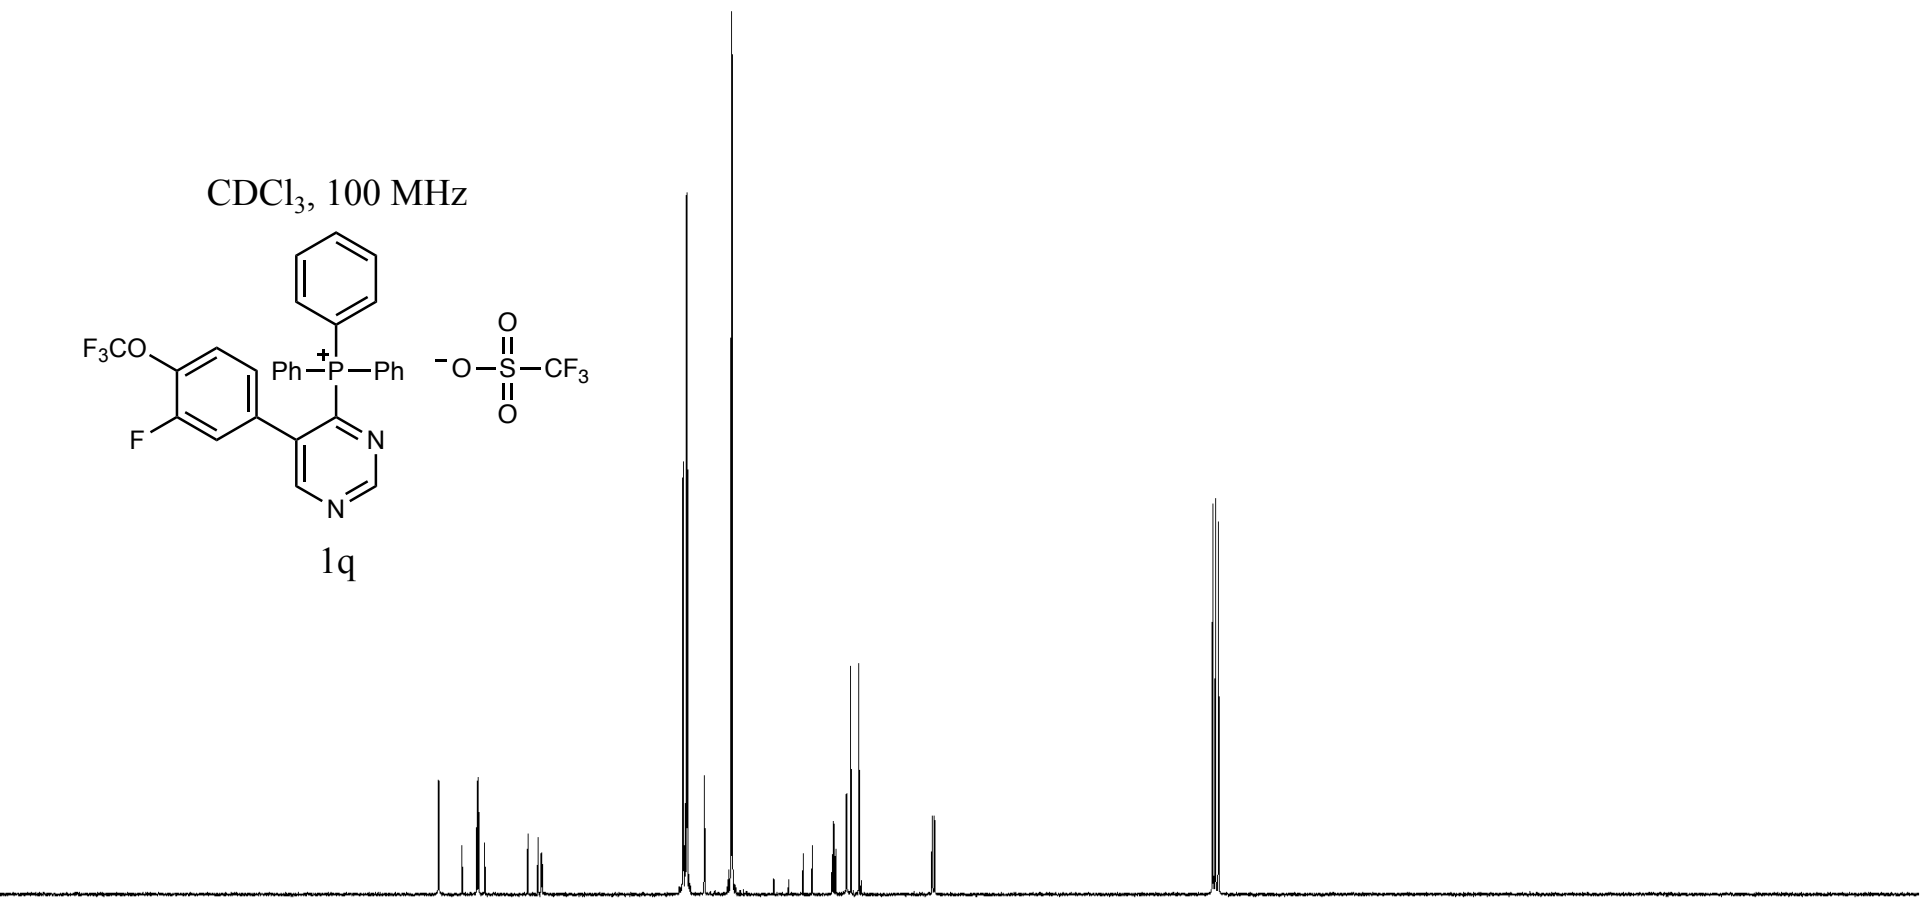

200 192 184 176 168 160 152 144 136 128 120 112 104 96 88 80 72 64 56 48 40 32 24 16 ppm

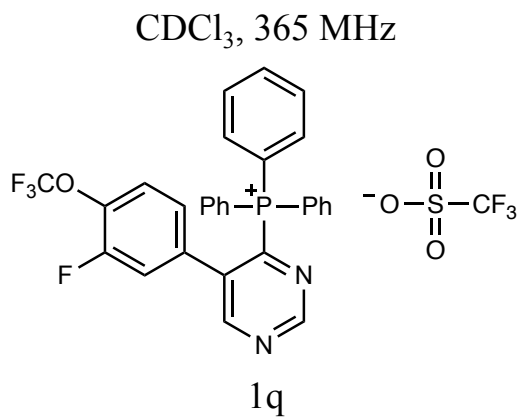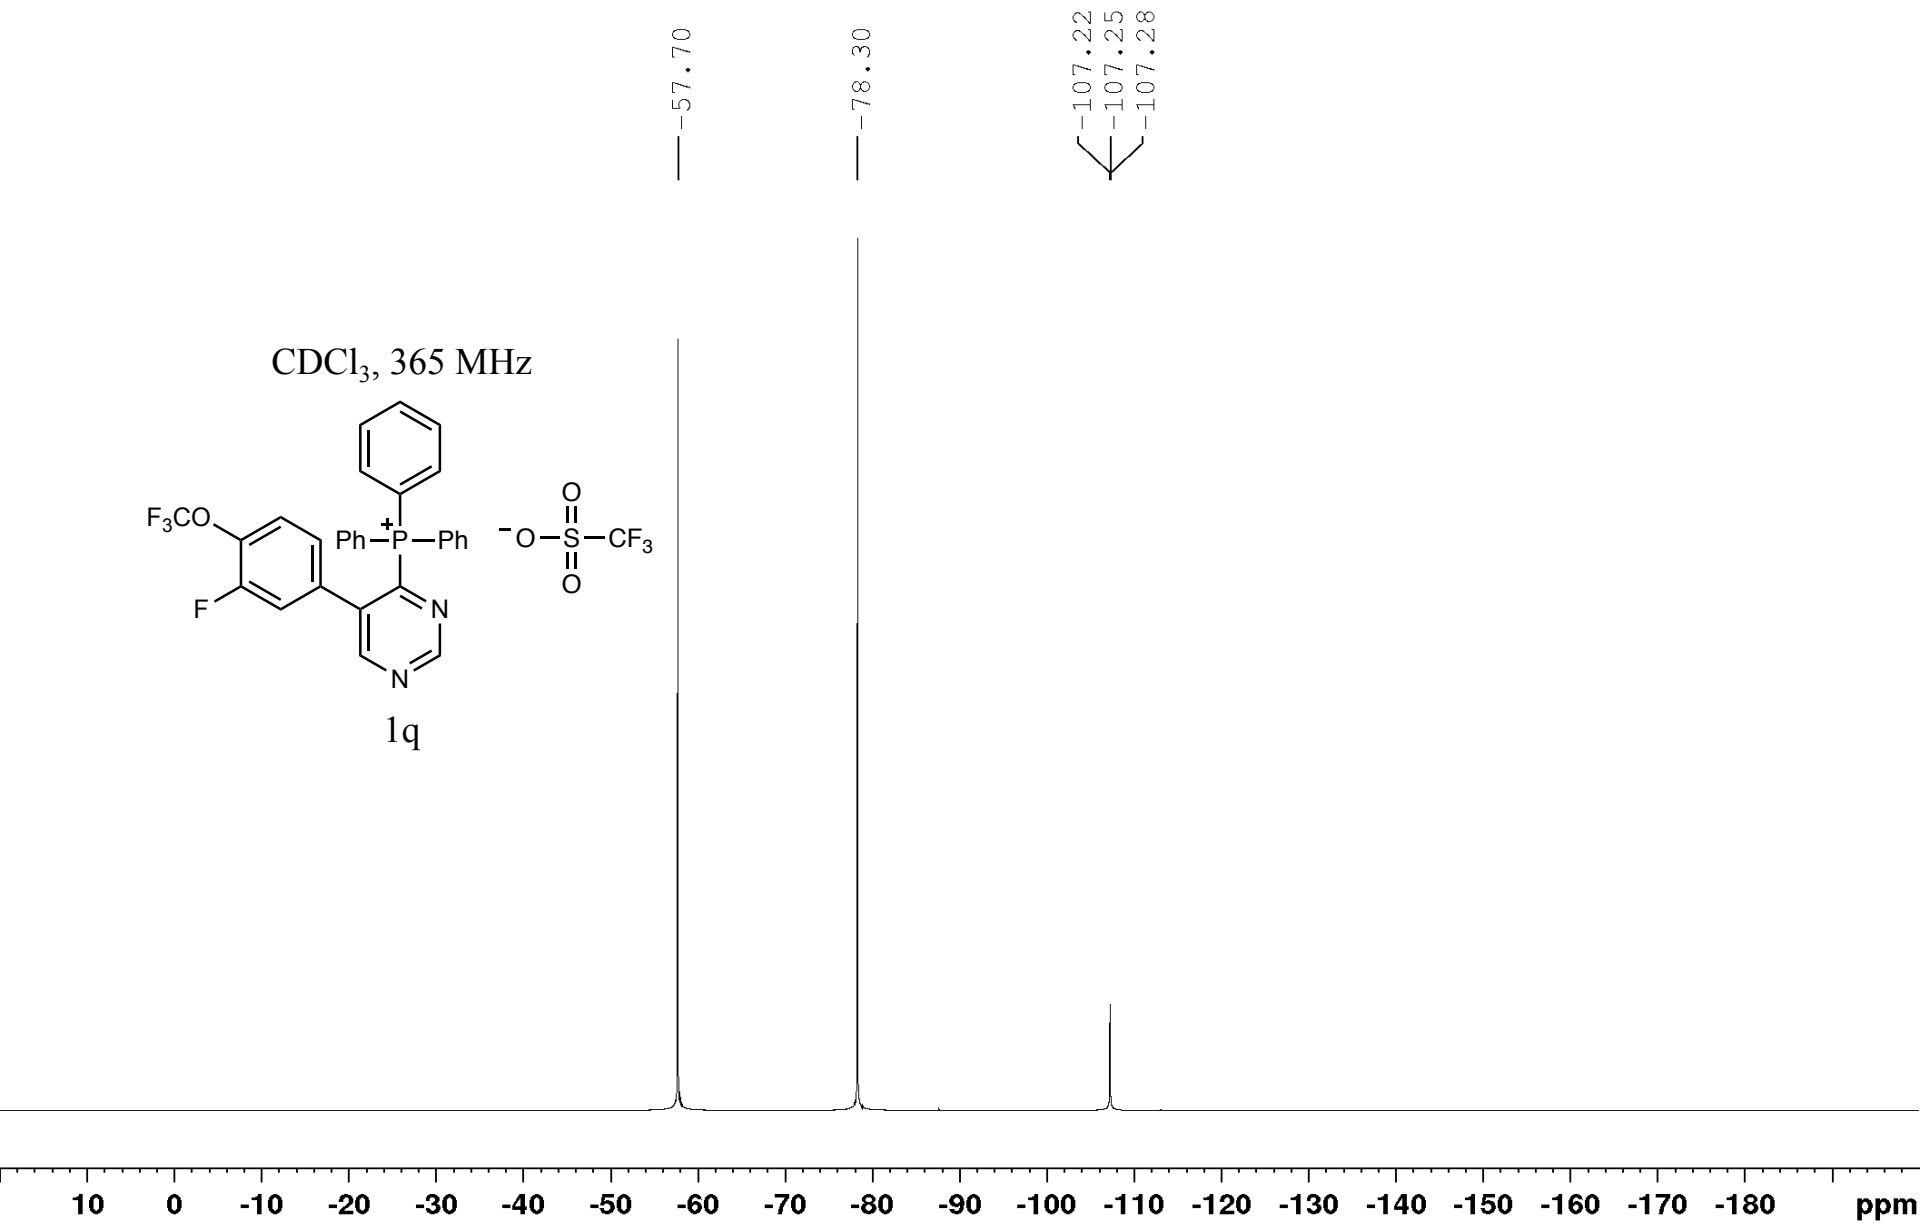



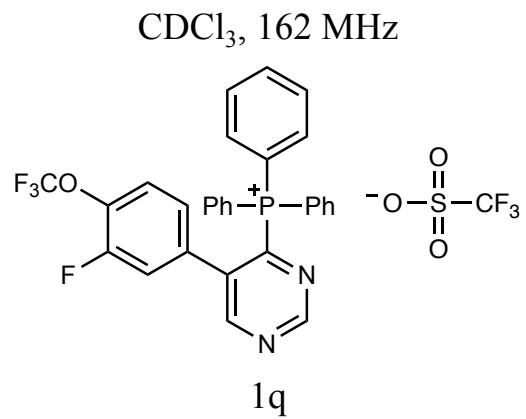

—17.12

140 130 120 110 100 90 80 70 60 50 40 30 20 10 0 -10 -20 -30 ppm

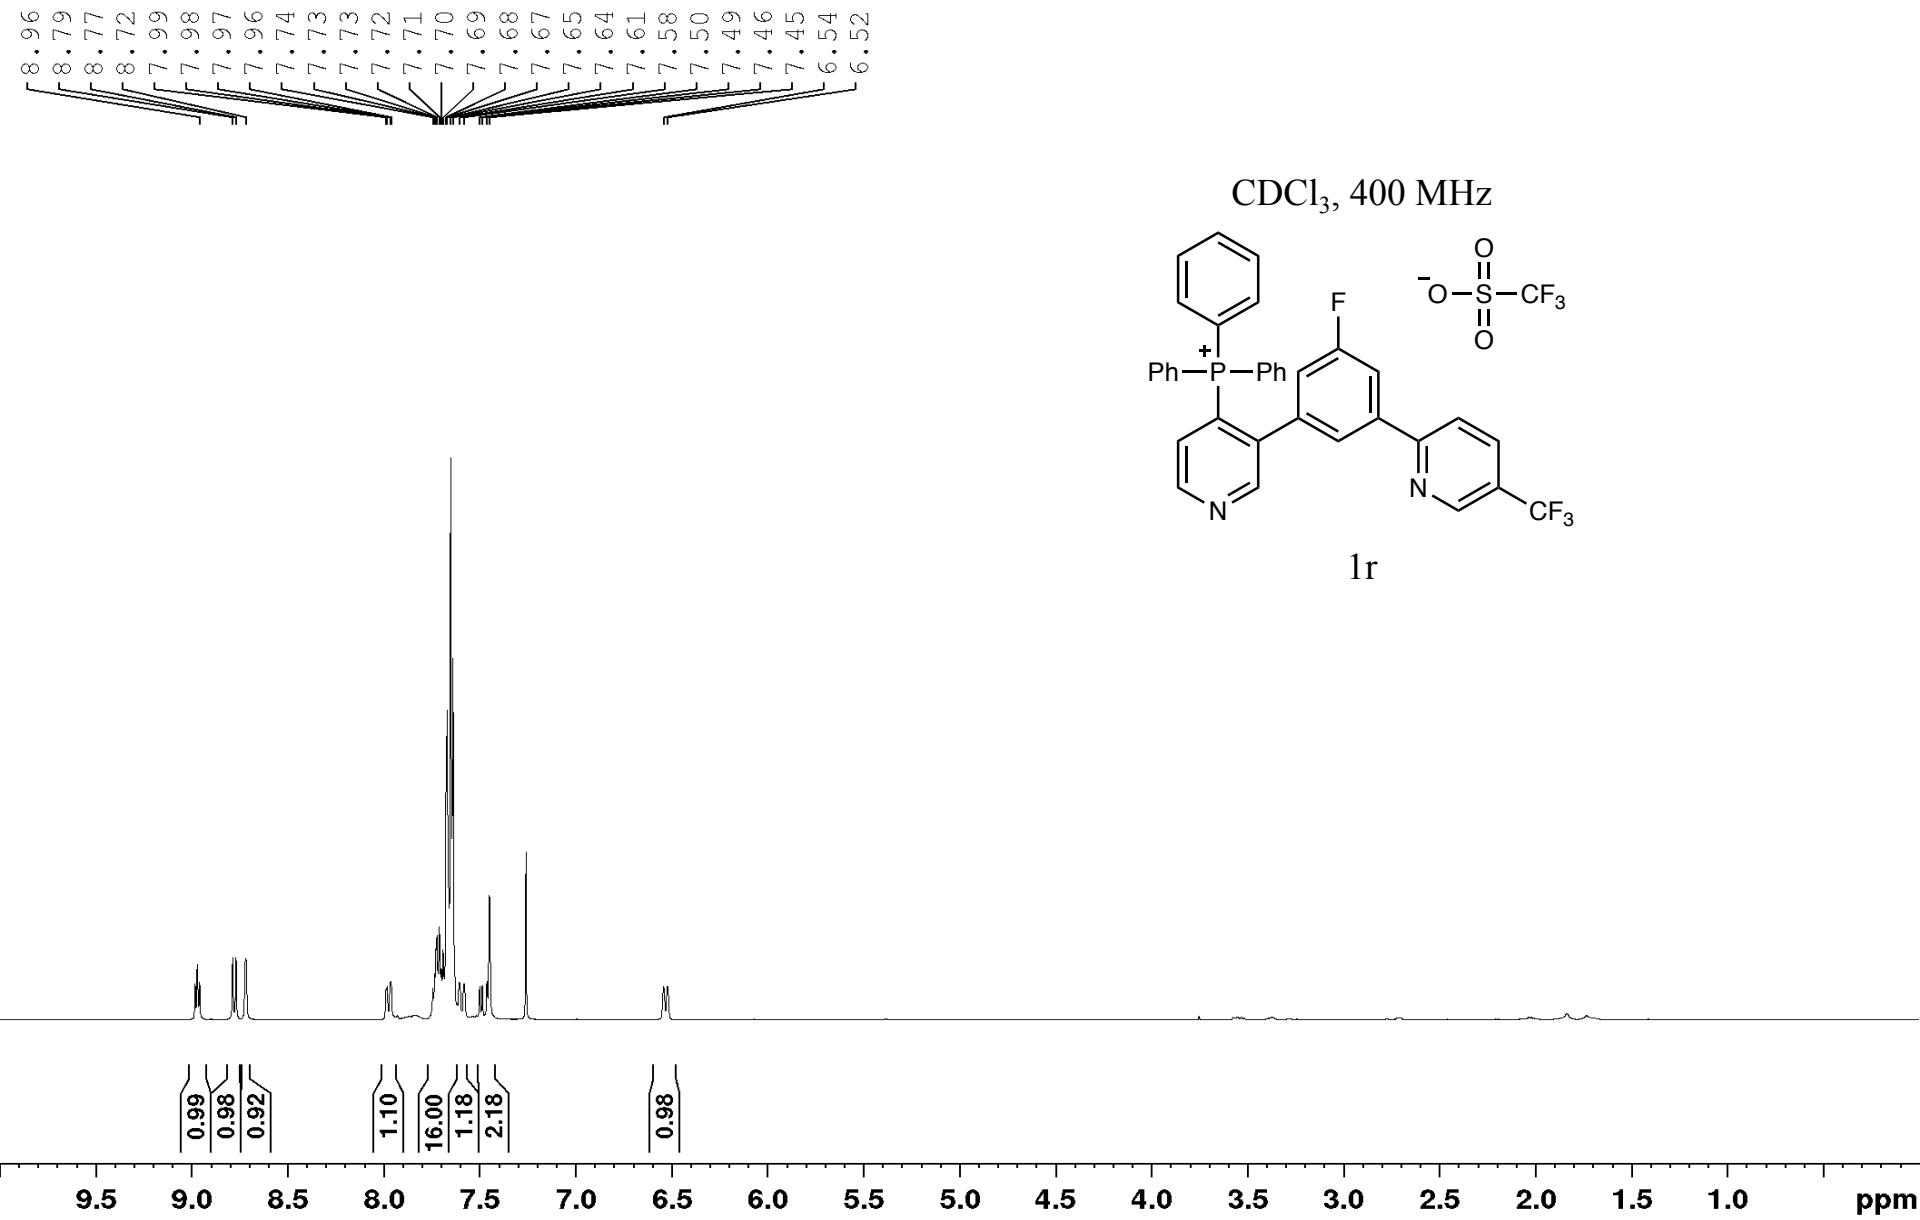

CDCl<sub>3</sub>, 100 MHz

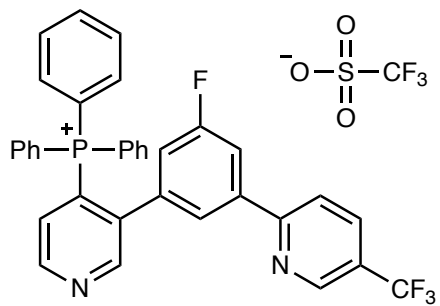

161.00  
156.95  
153.37  
153.30  
150.67  
150.57  
146.24  
146.20  
140.01  
139.93  
139.89  
139.87  
139.82  
139.80  
137.18  
137.06  
135.44  
135.41  
134.59  
134.55  
134.46  
134.36  
130.71  
130.58  
128.49  
128.40  
127.48  
127.09  
126.26  
125.96  
125.63  
125.30  
124.76  
122.41  
120.50  
119.21  
117.61  
117.38  
117.33  
116.45  
114.71  
114.48  
77.32  
77.00  
76.68

200 192 184 176 168 160 152 144 136 128 120 112 104 96 88 80 72 64 56 48 40 32 24 16 ppm

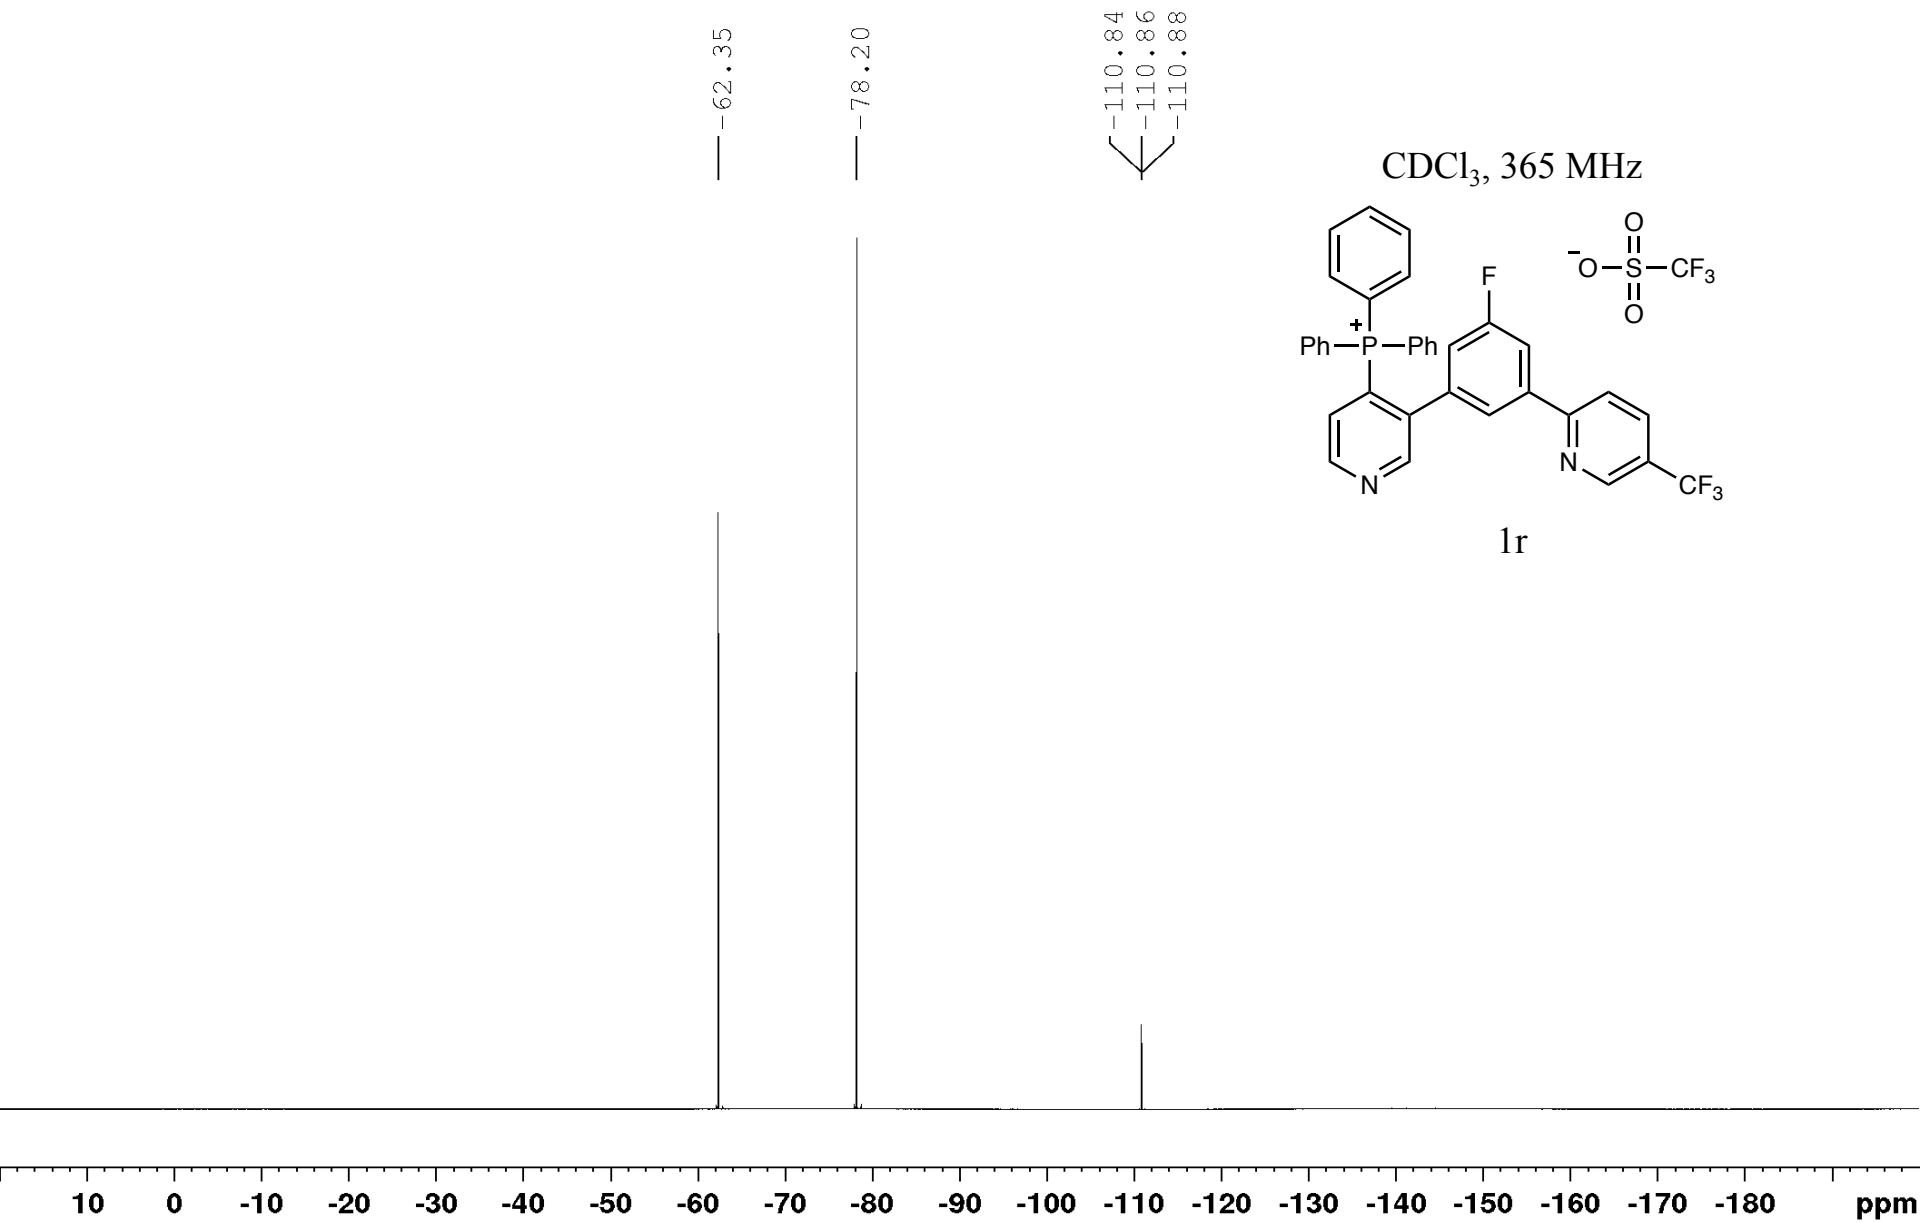

CDCl<sub>3</sub>, 162 MHz

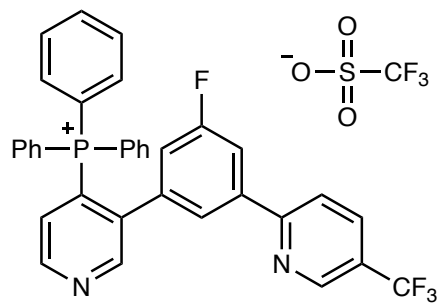

1r

— 21.30

140 130 120 110 100 90 80 70 60 50 40 30 20 10 0 -10 -20 -30 ppm

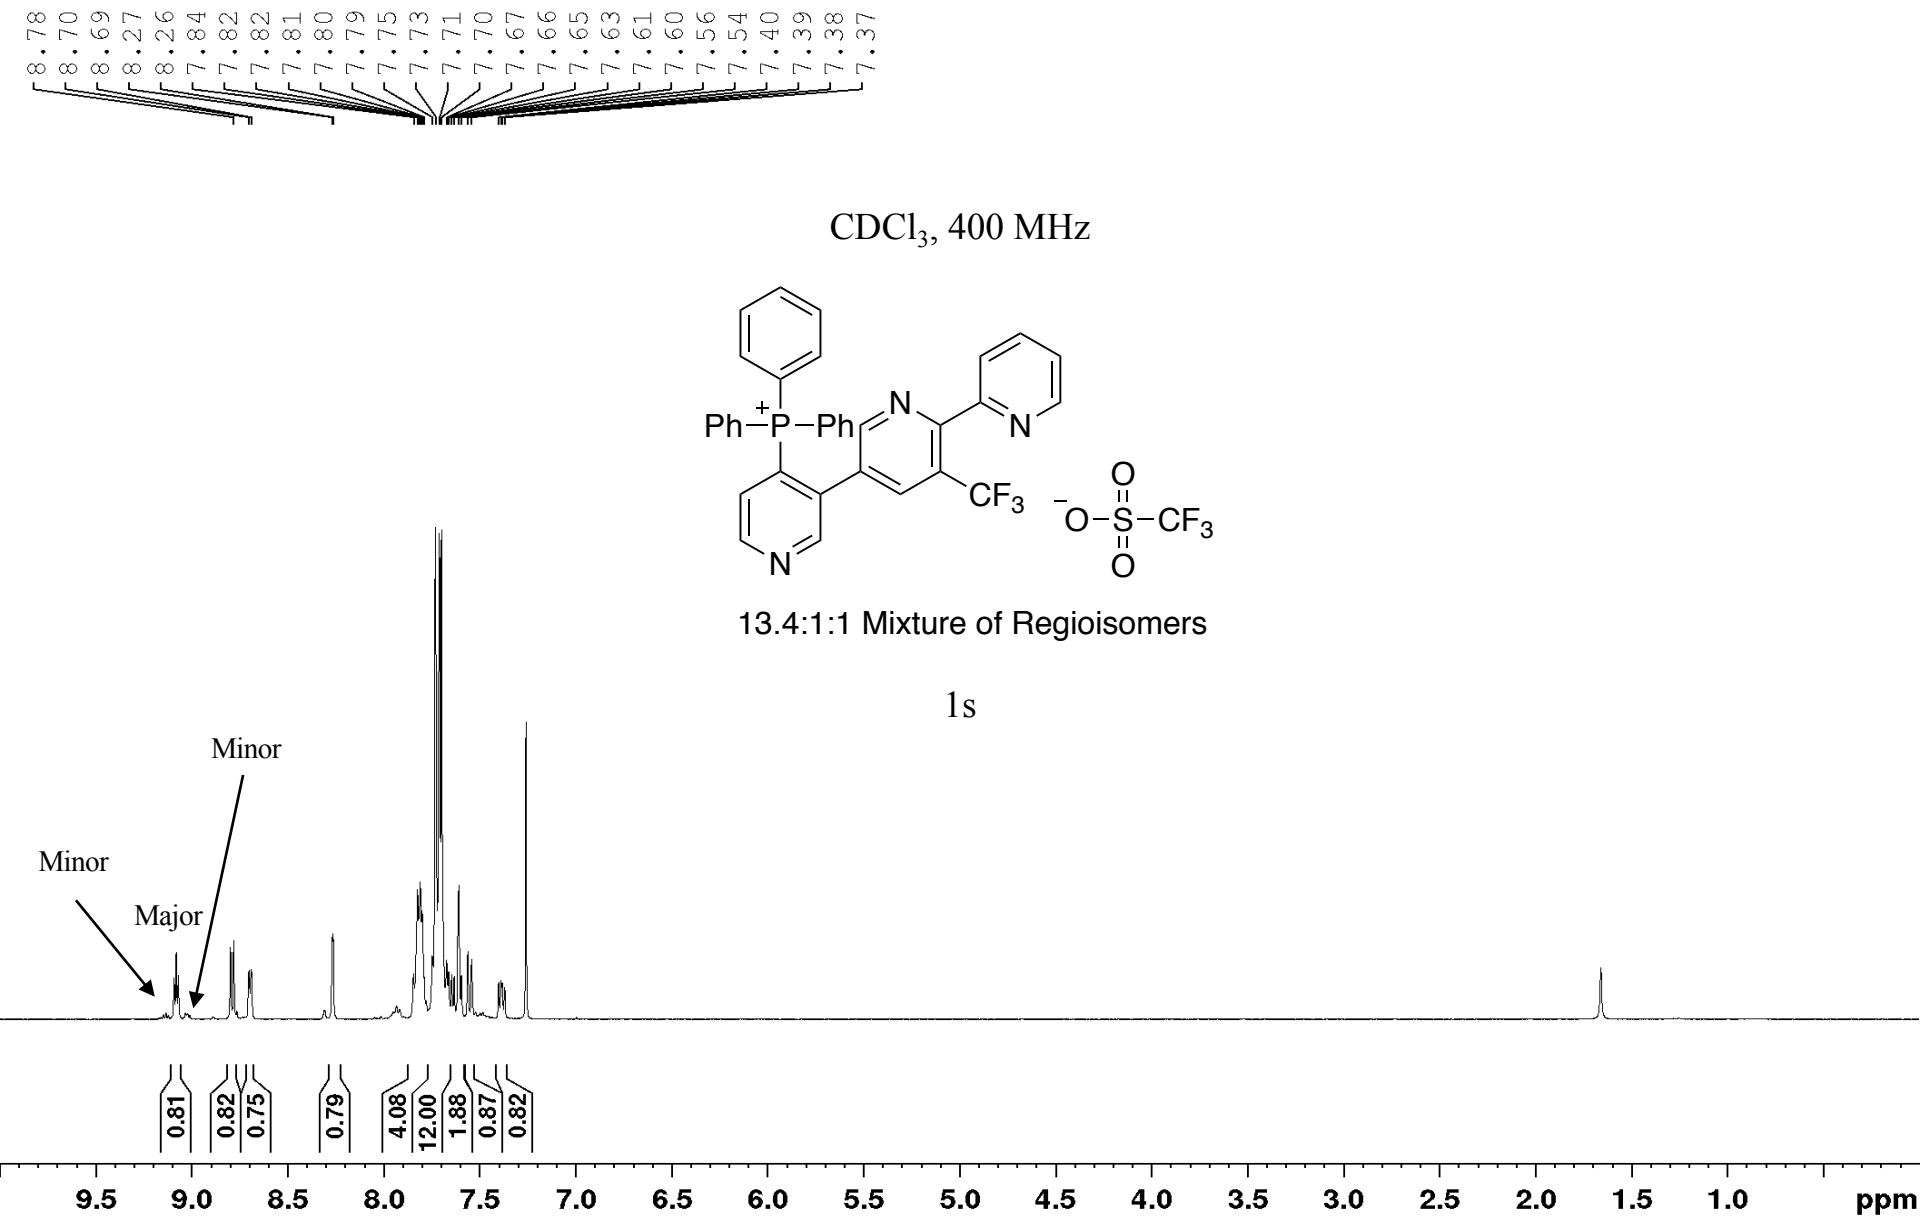

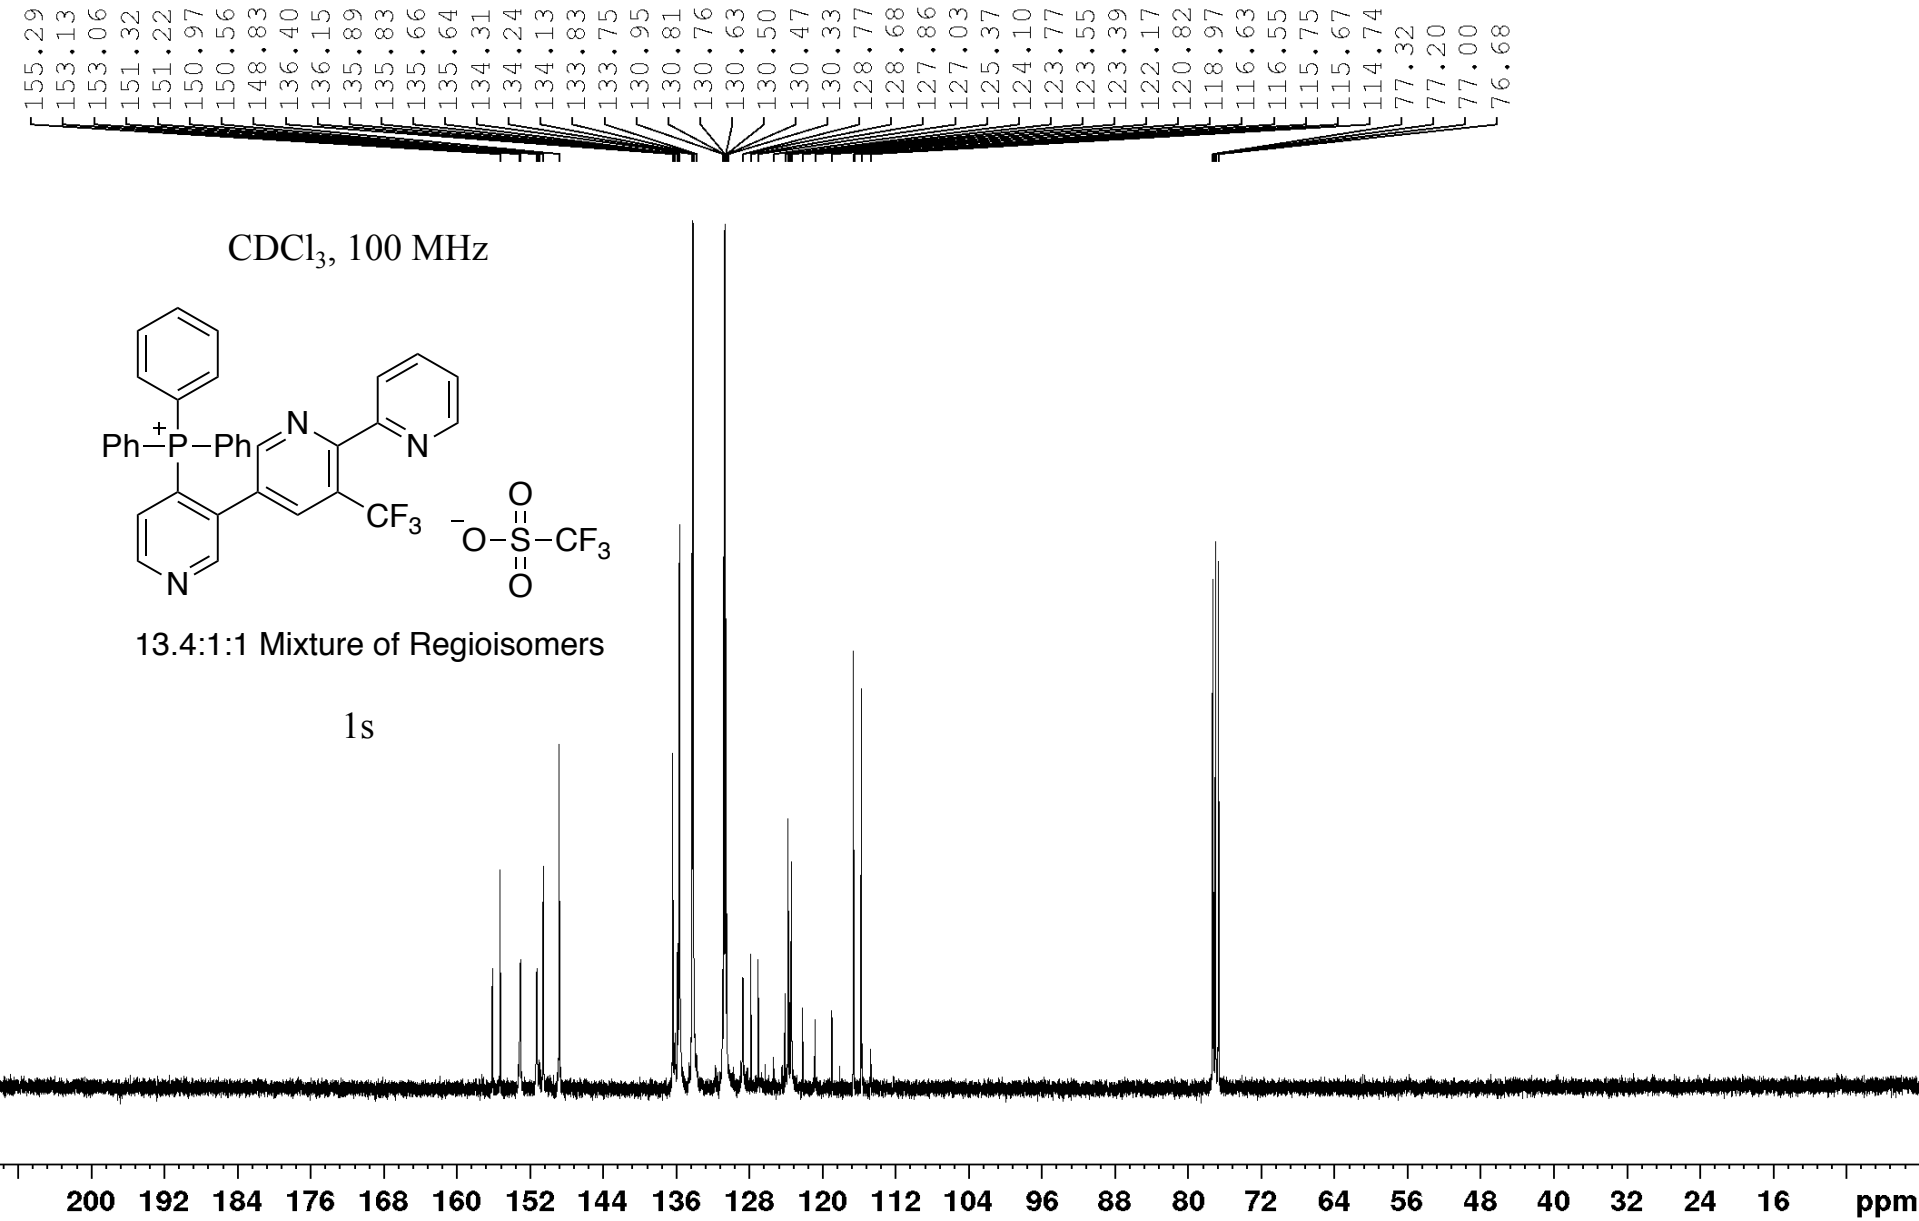

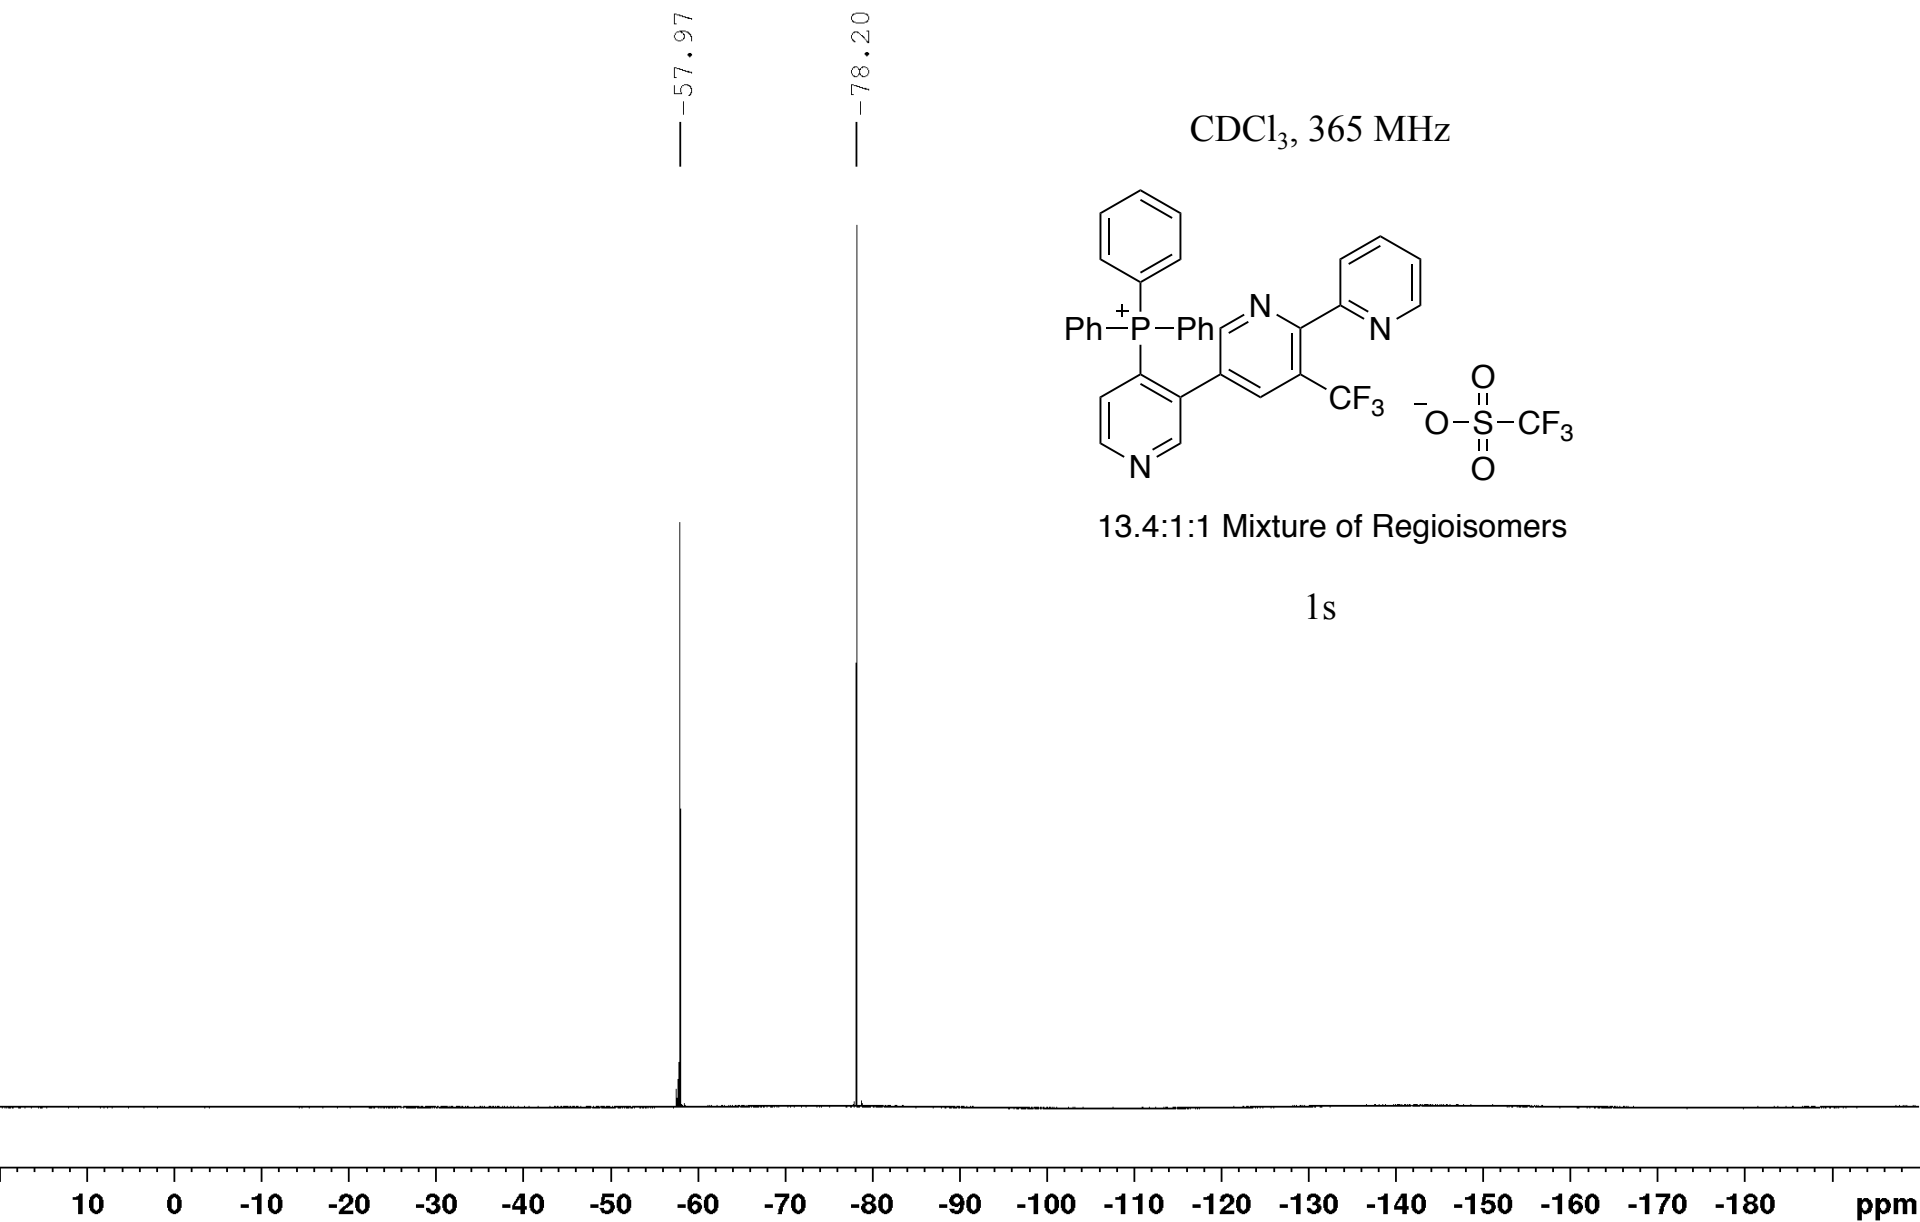



CDCl<sub>3</sub>, 162 MHz (crude <sup>31</sup>P NMR)

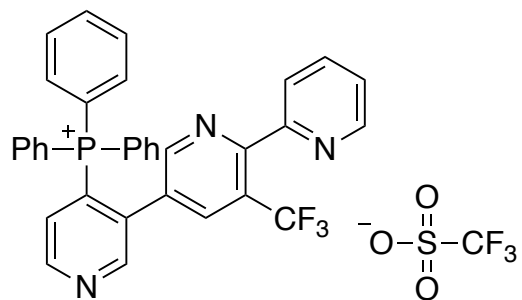

1s

29.02  
22.67  
21.34  
21.07  
20.96  
20.80

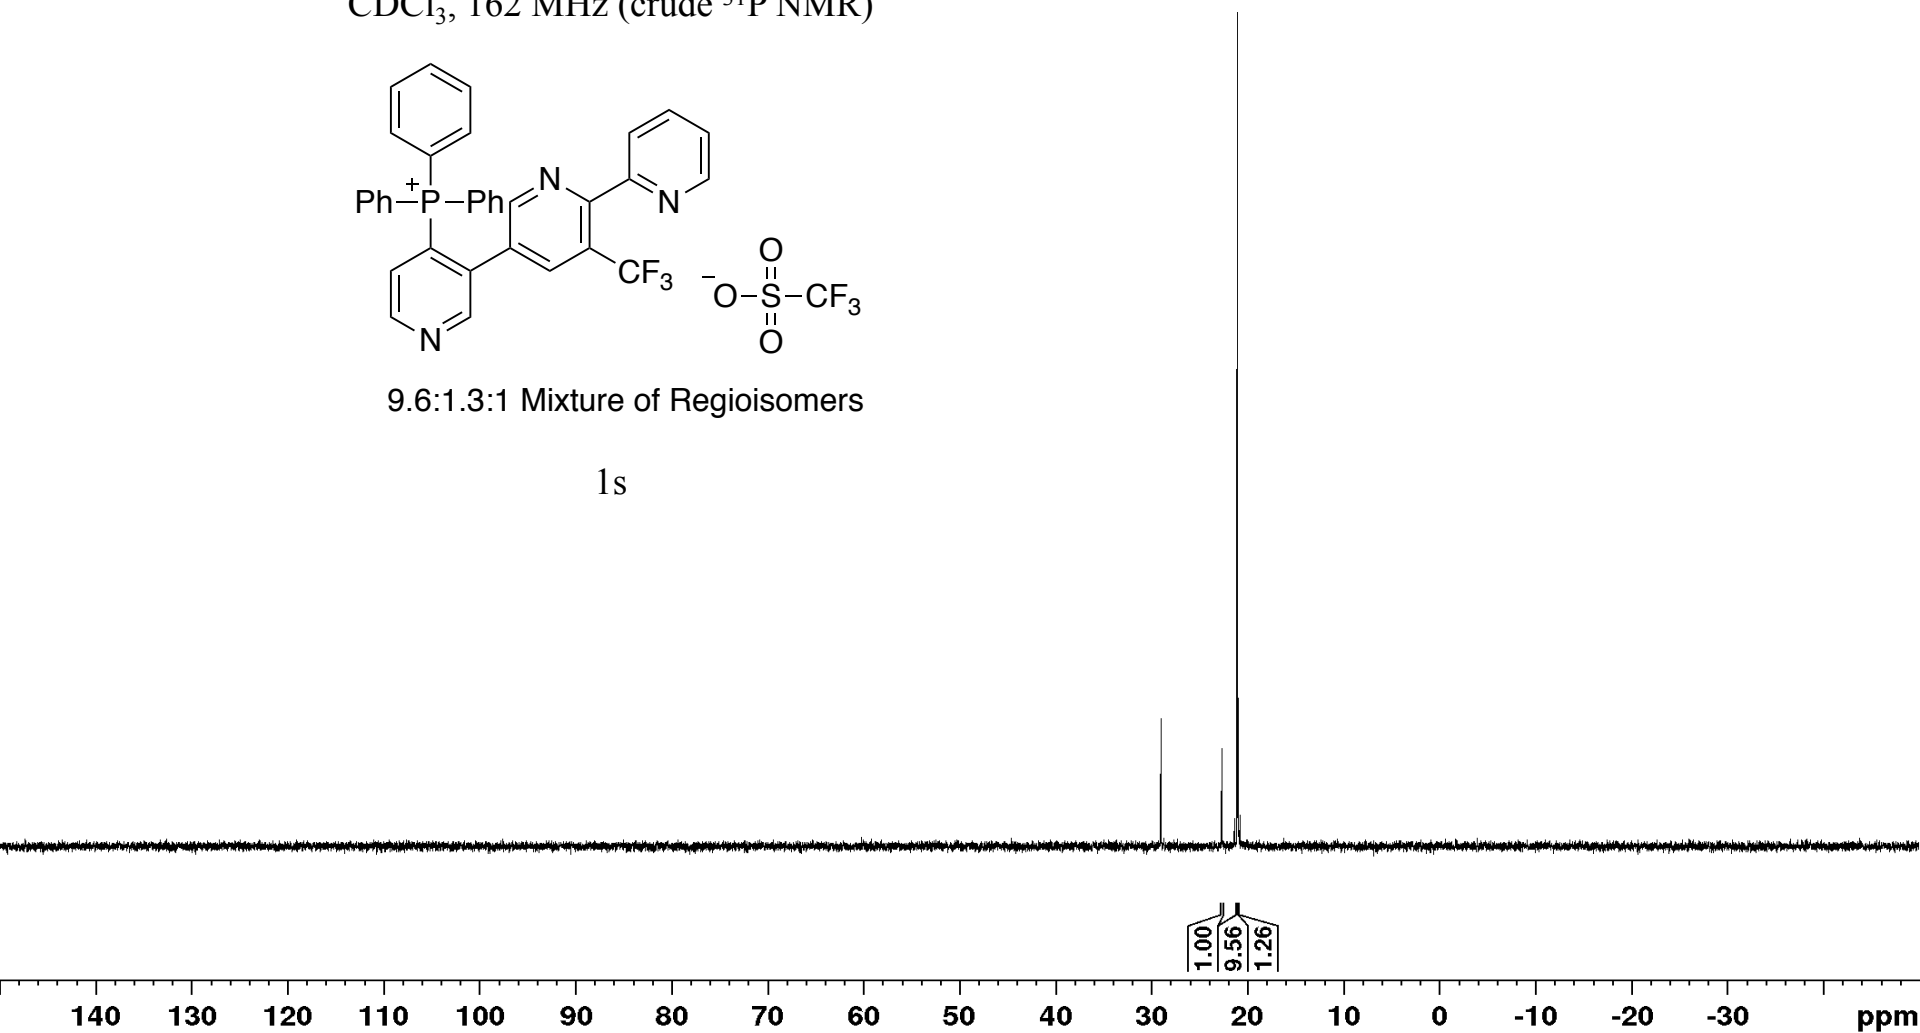

CDCl<sub>3</sub>, 162 MHz (Post-precipitate <sup>31</sup>P NMR)

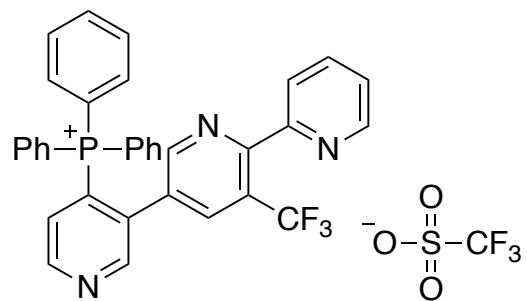

13.4:1:1 Mixture of Regioisomers

1s

22.64  
21.05  
20.93

1.00  
13.39  
1.02

140 130 120 110 100 90 80 70 60 50 40 30 20 10 0 -10 -20 -30 ppm

7.75  
7.73  
7.73  
7.72  
7.70  
7.70  
7.59  
7.59  
7.57  
7.57  
7.55  
7.55  
7.50  
7.50  
7.49  
7.48  
7.47  
7.46  
7.26  
6.05  
6.03

2.93  
2.86

1.86  
1.85

CDCl<sub>3</sub>, 400 MHz

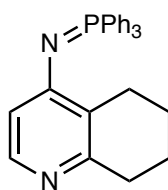

2a

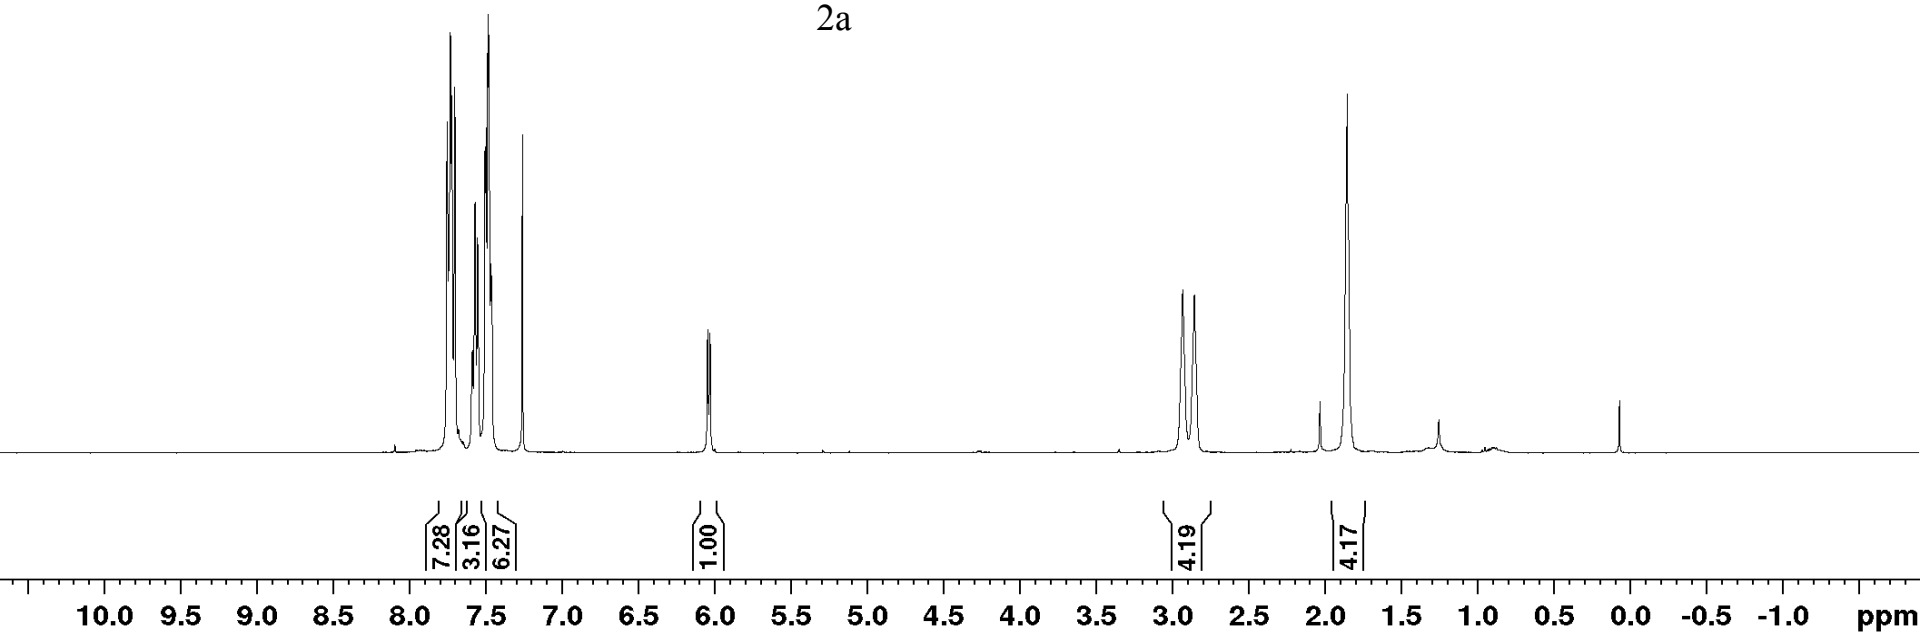

CDCl<sub>3</sub>, 100 MHz

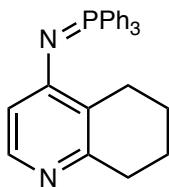

2a

158.54  
154.56  
143.78  
132.51  
132.41  
132.23  
132.20  
130.37  
129.37  
128.92  
128.80  
127.56  
127.32  
113.09  
112.98

77.32  
77.00  
76.68

31.69  
24.94  
23.01  
22.91

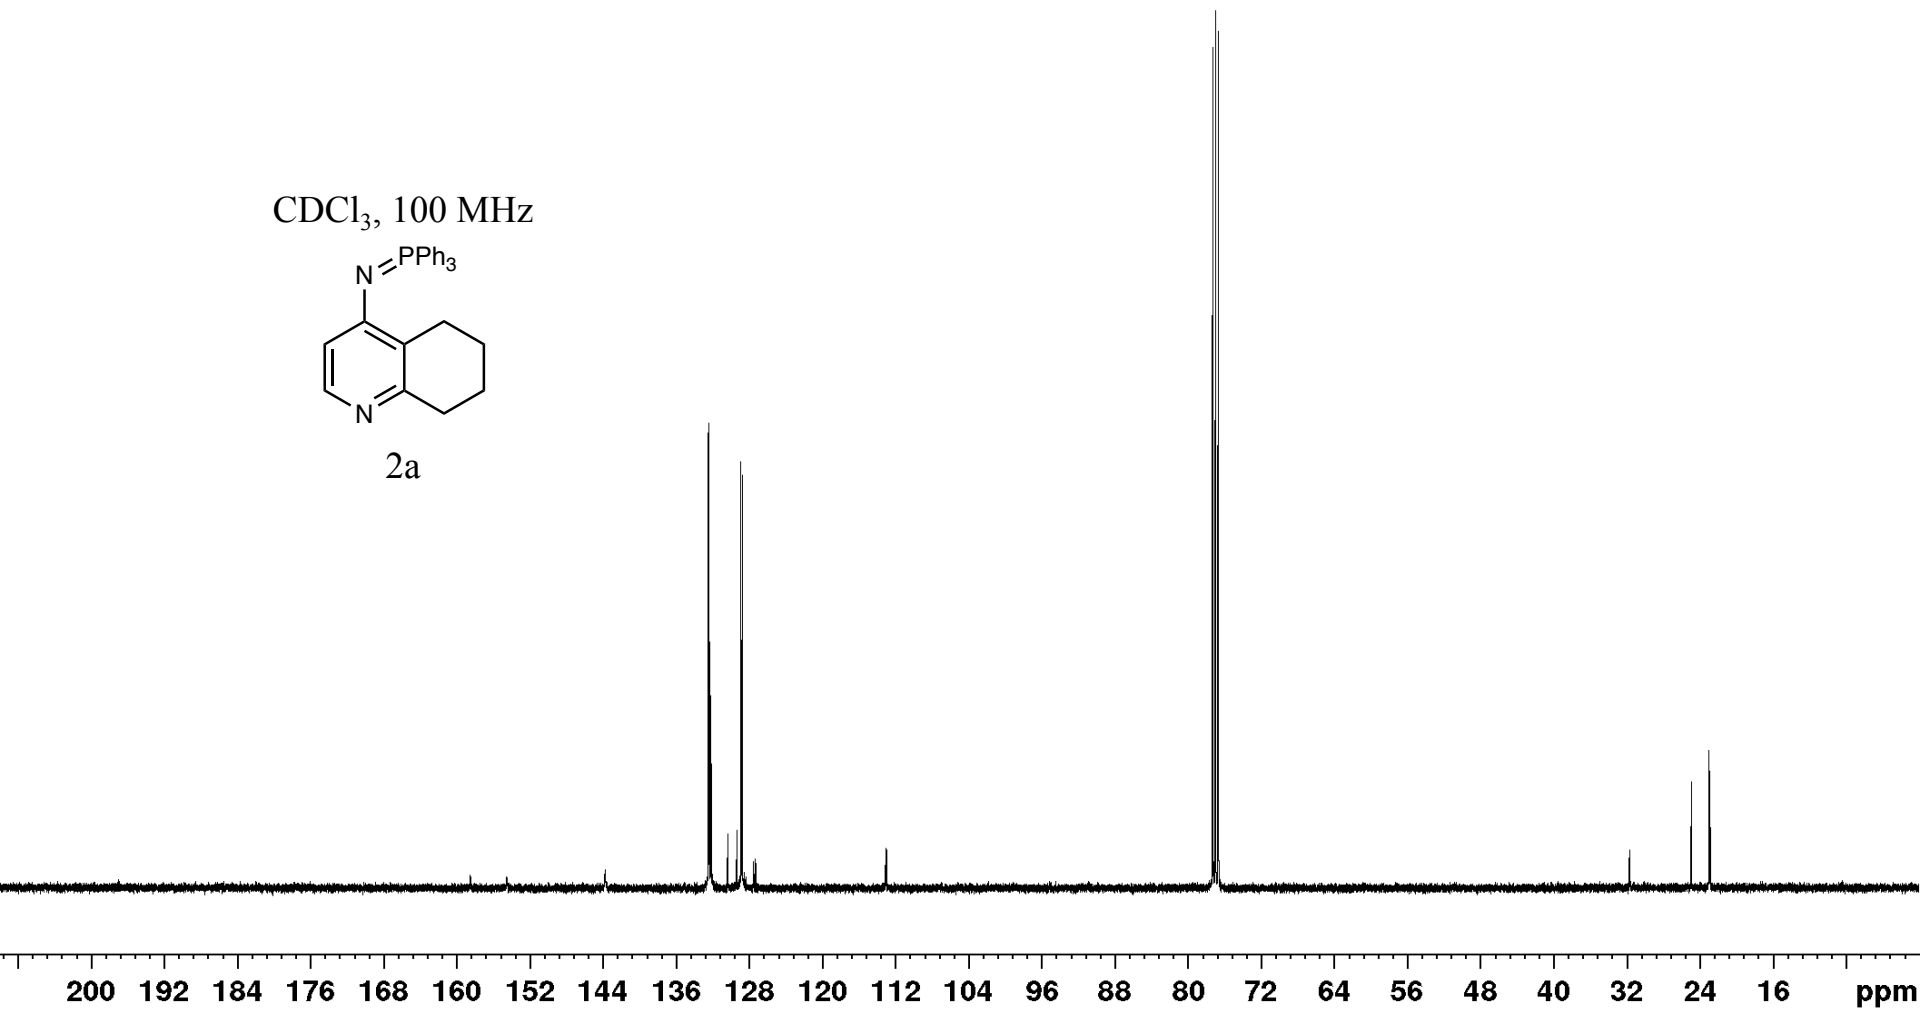

CDCl<sub>3</sub>, 162 MHz

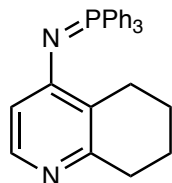

2a

5.96

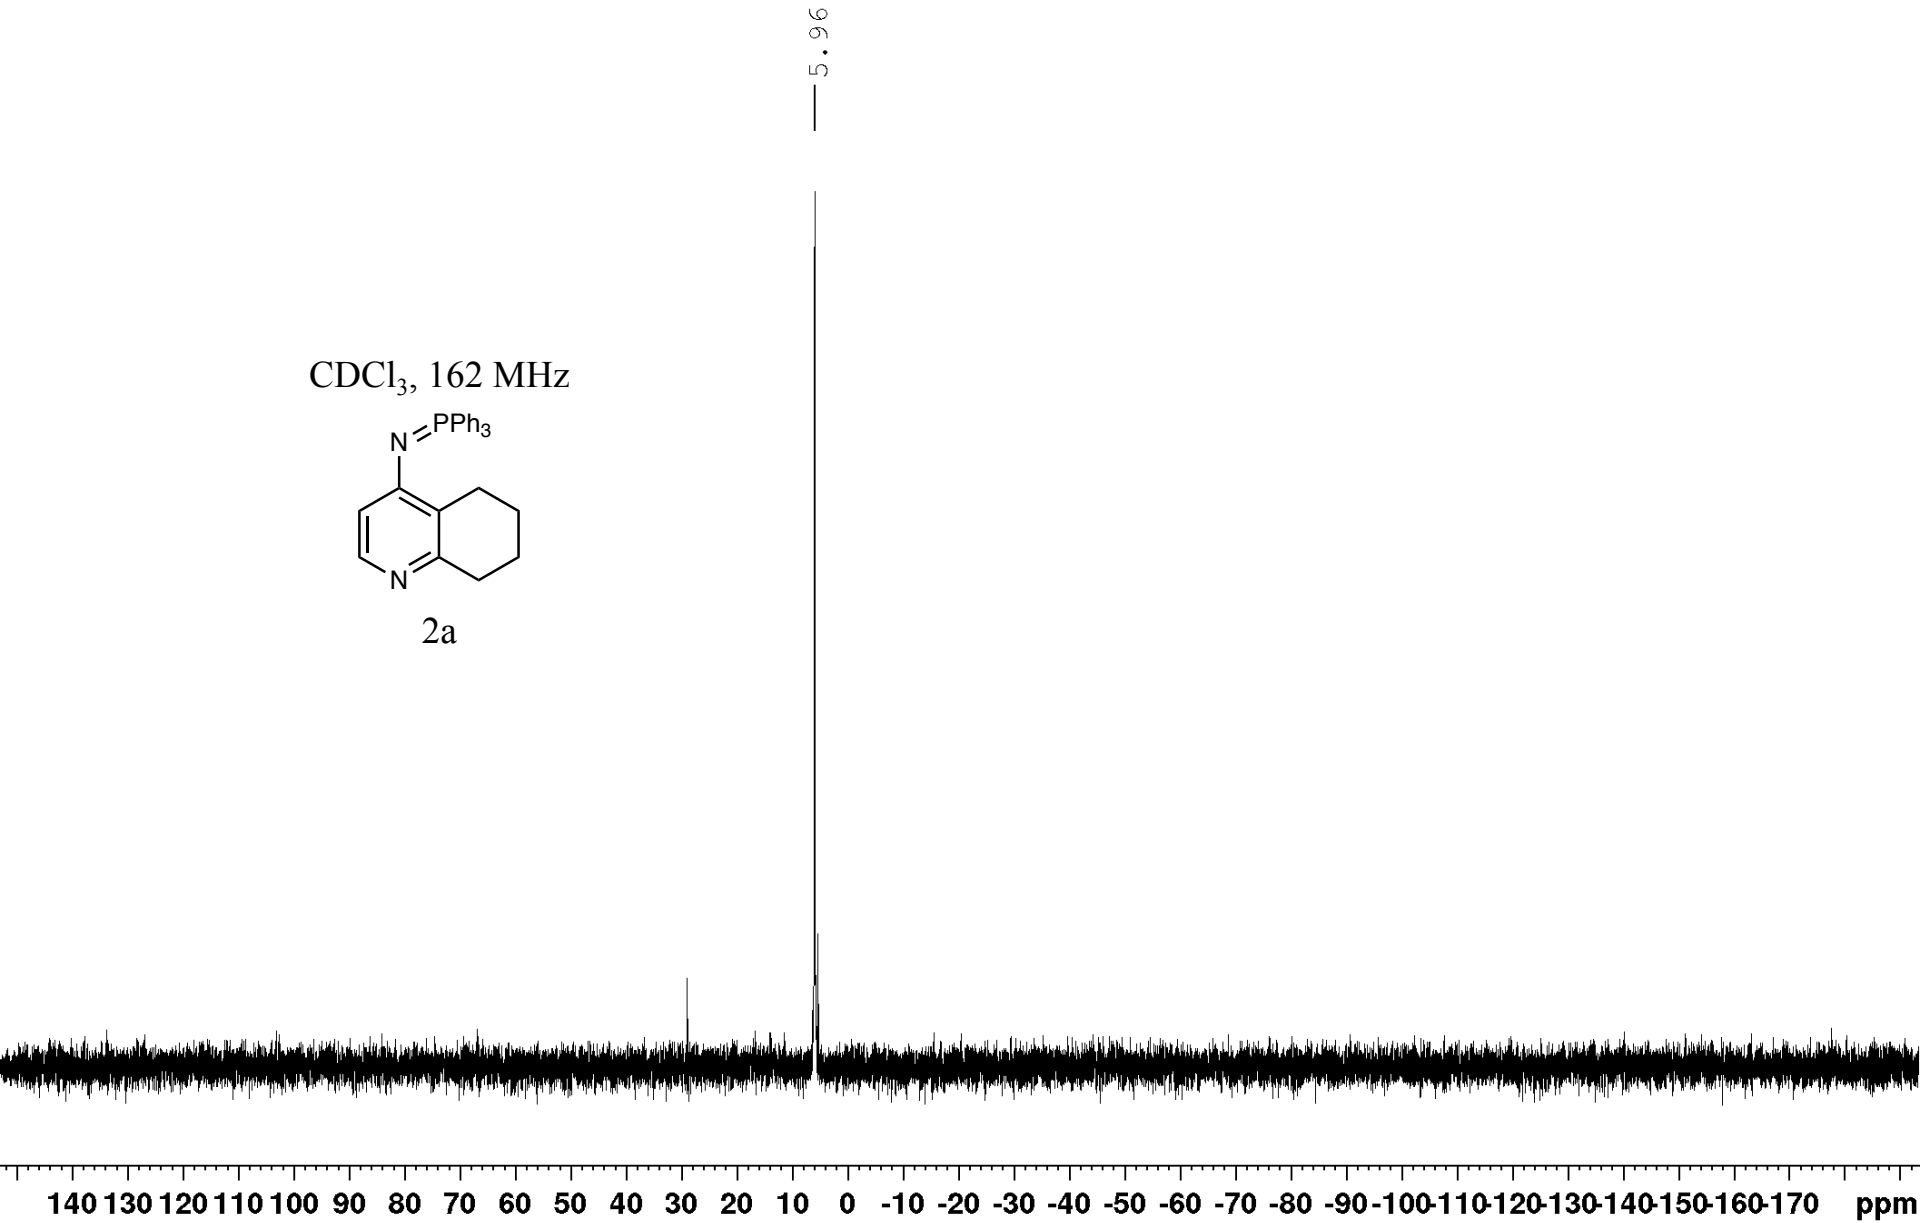

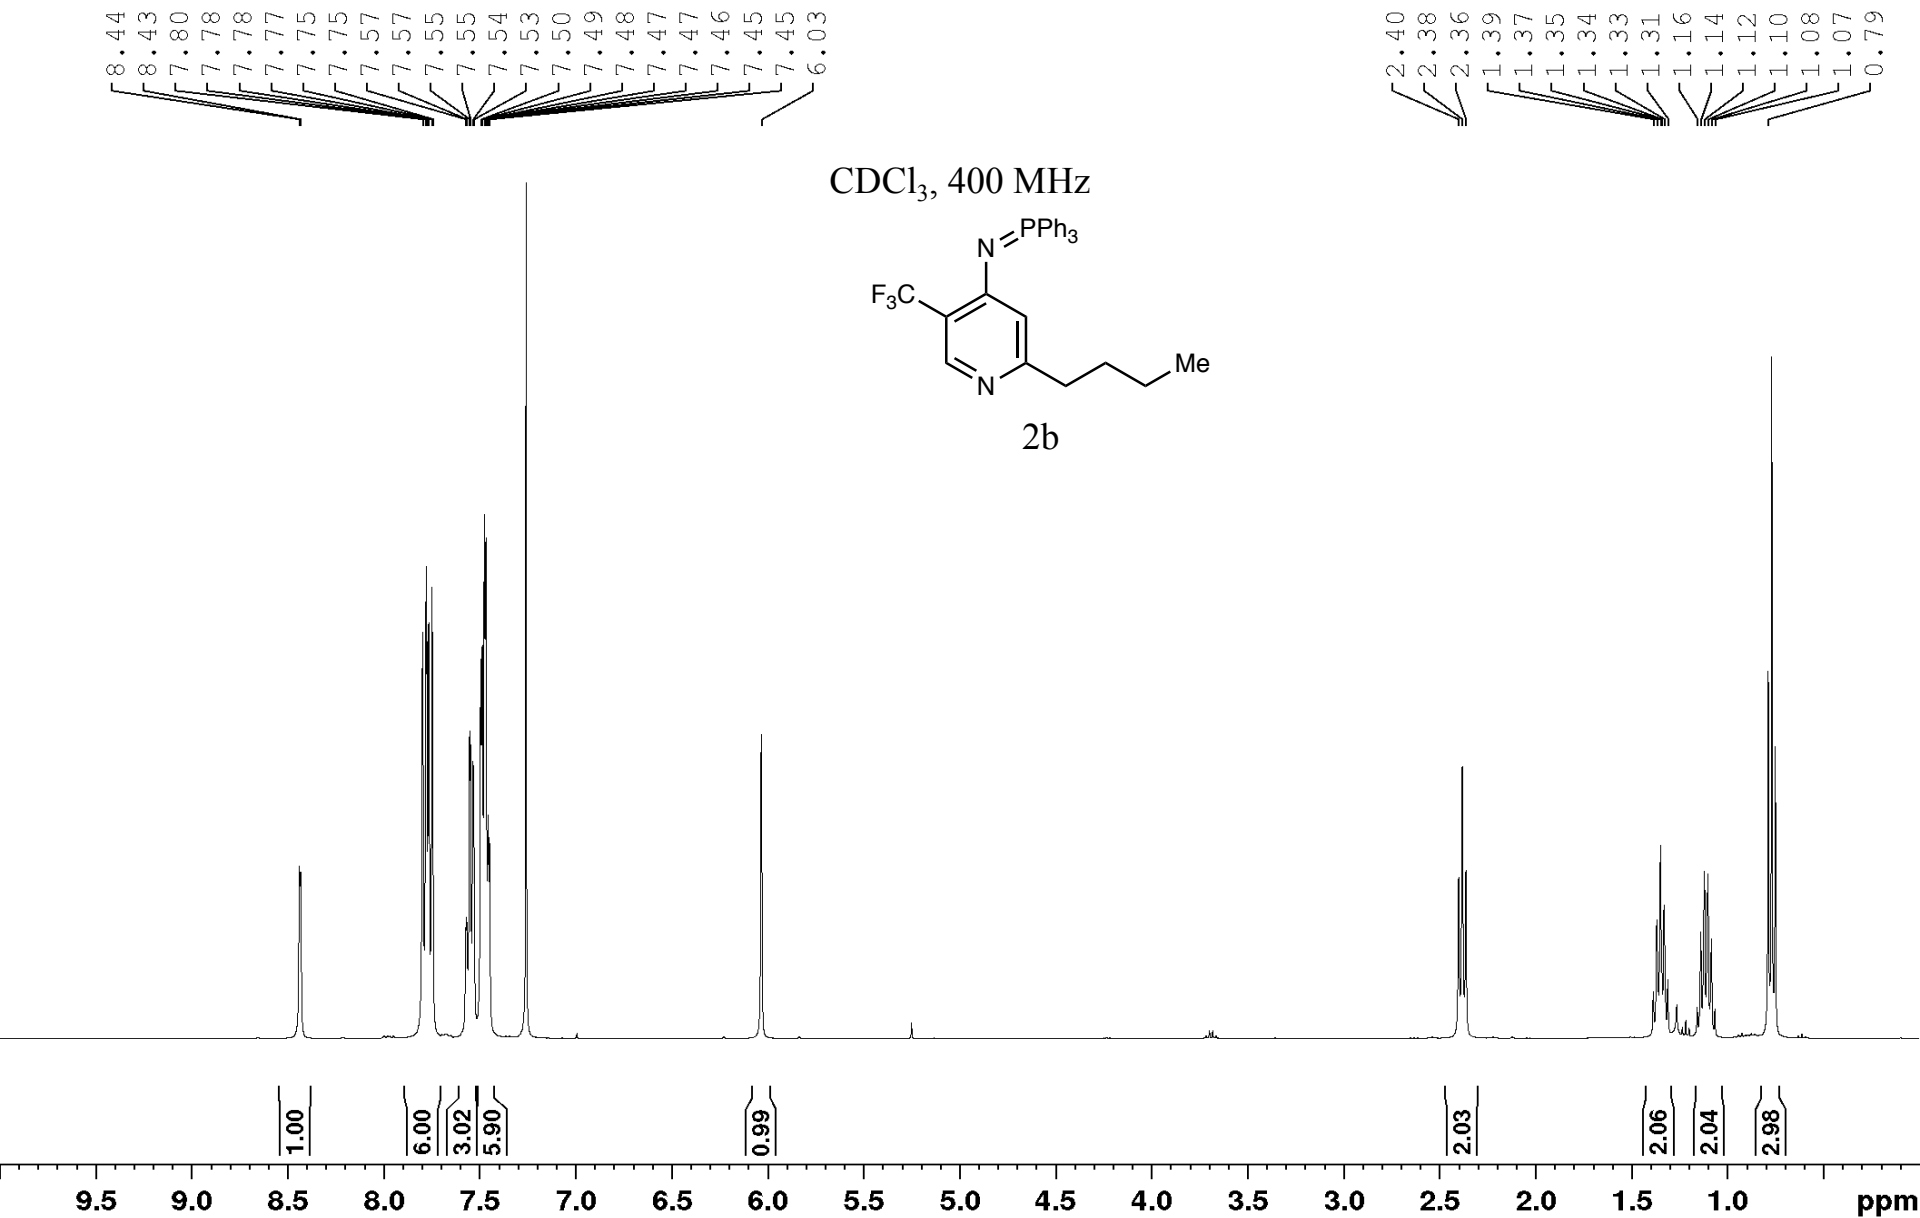

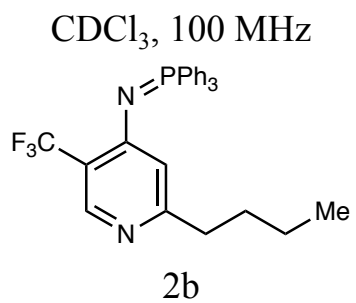

164.45  
157.38  
147.22  
147.20  
147.16  
147.14  
147.10  
147.08  
132.49  
132.39  
132.23  
132.20  
132.12  
129.88  
129.11  
128.98  
128.87  
128.75  
126.70  
124.00  
118.06  
117.82  
117.79  
117.55  
115.11  
114.99  
77.32  
77.20  
77.00  
76.68

— 37.56  
— 31.18  
— 21.97  
— 13.79

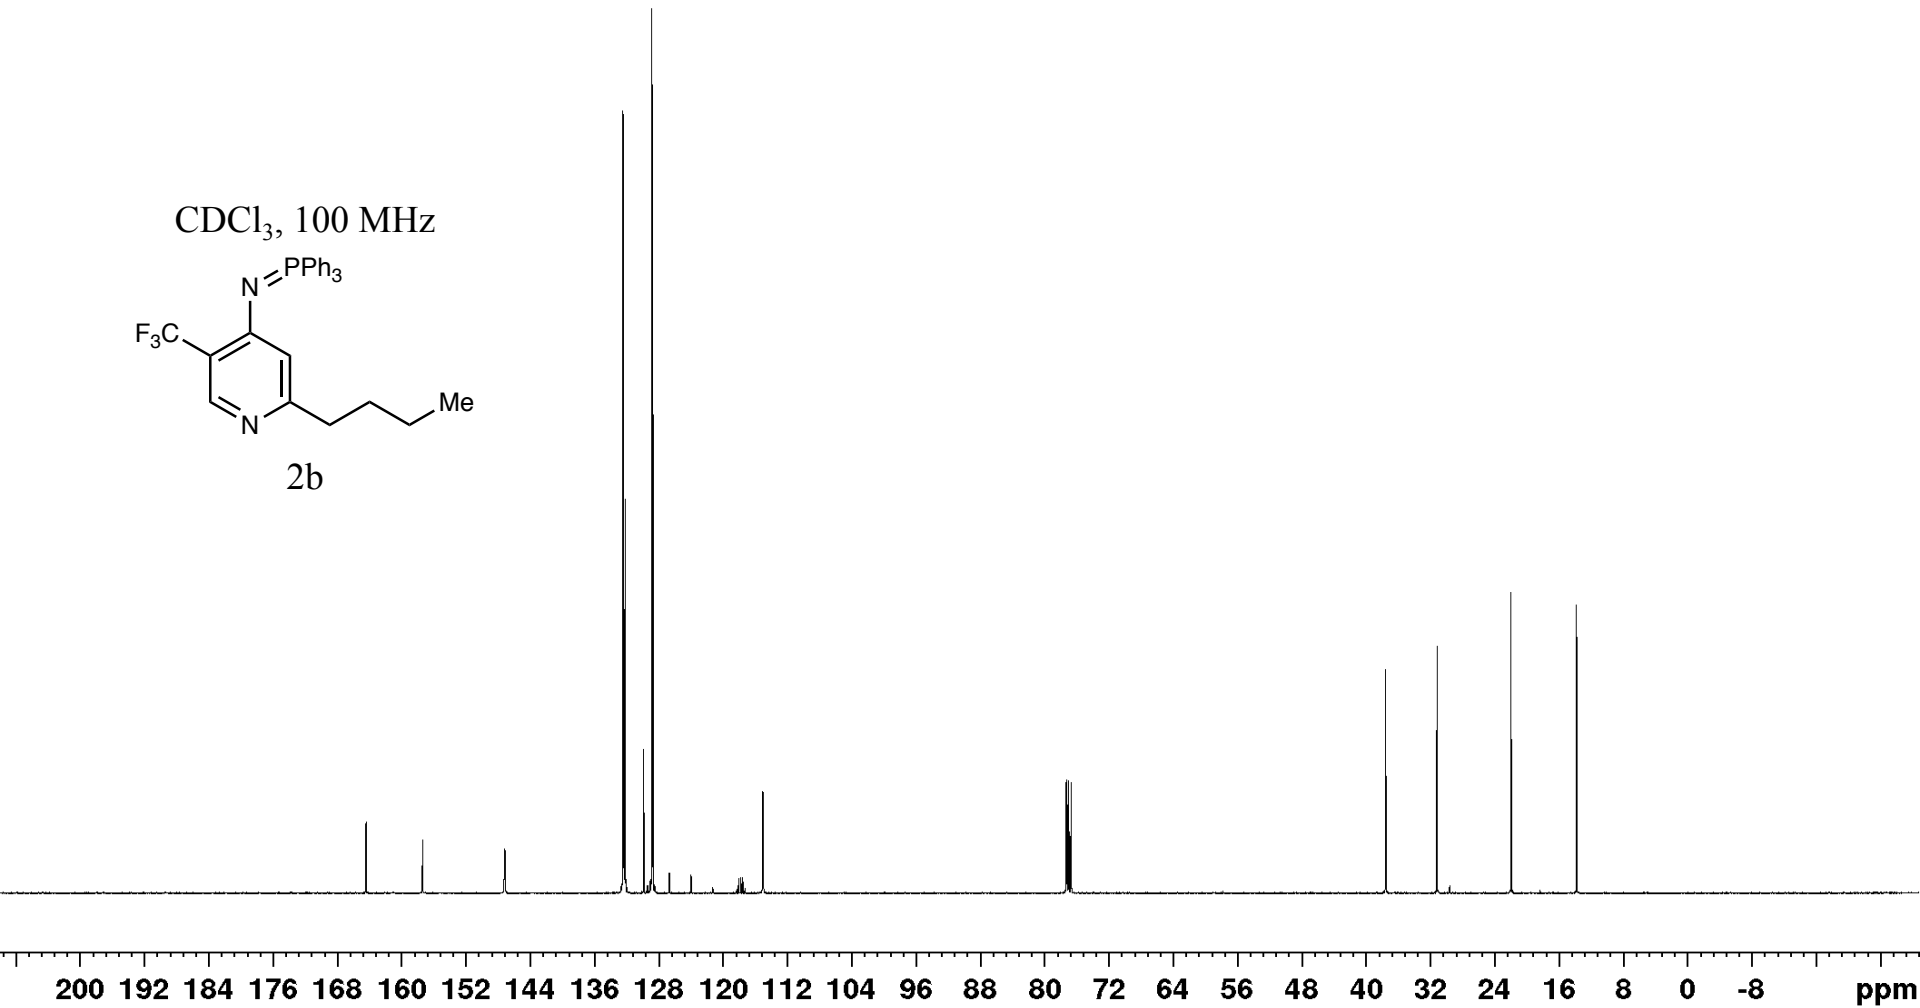

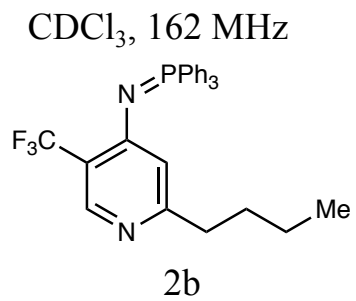

6.24

140 130 120 110 100 90 80 70 60 50 40 30 20 10 0 -10 -20 -30 ppm



— -62.27

CDCl<sub>3</sub>, 365 MHz

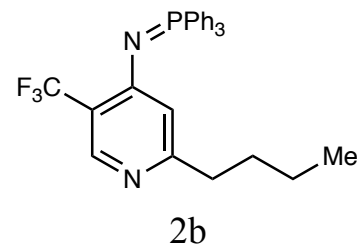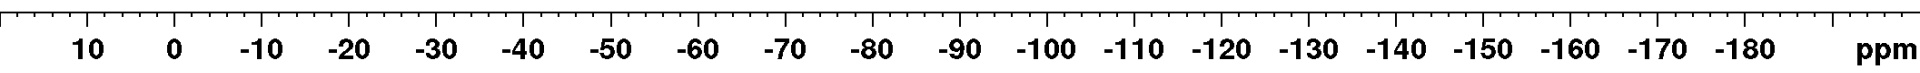

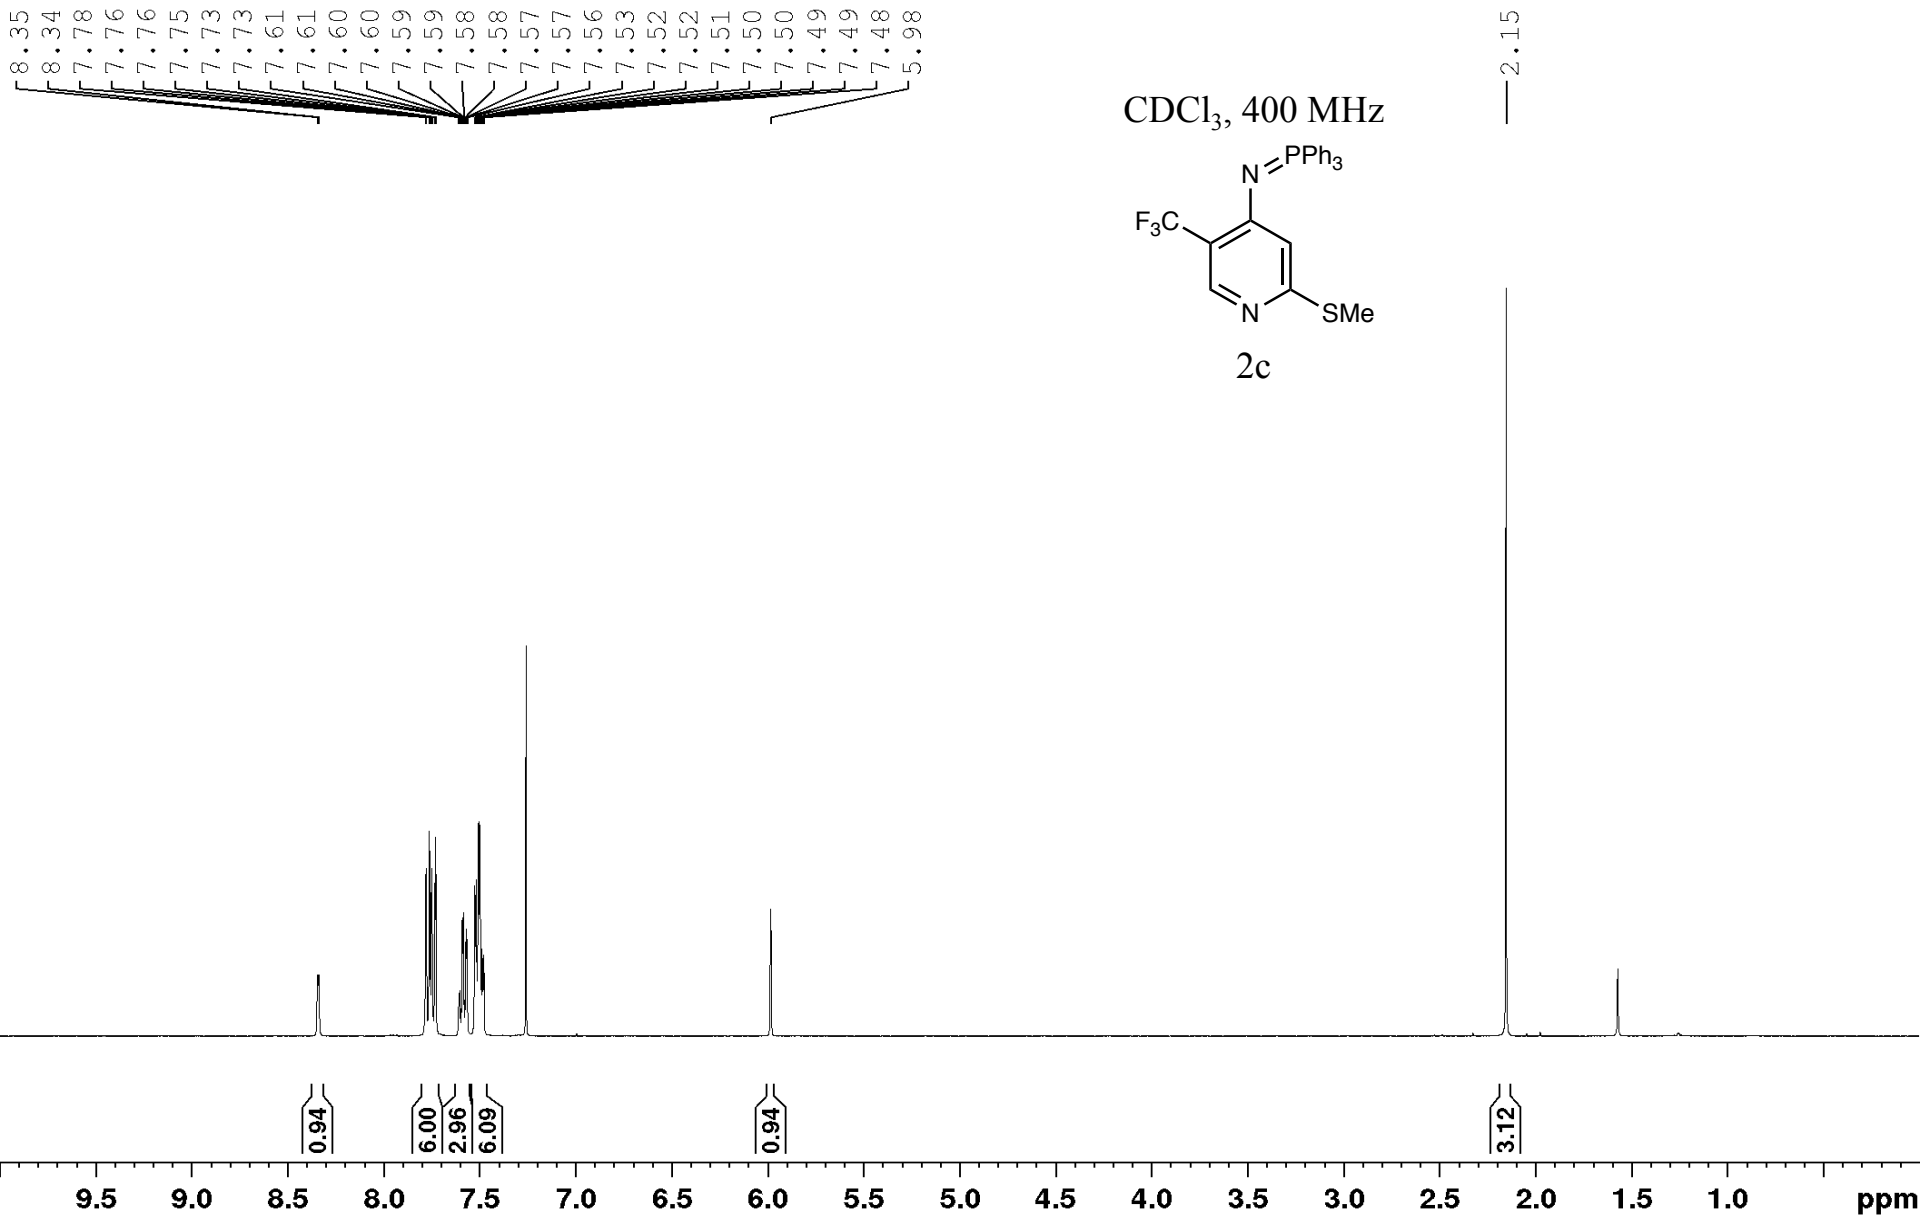

CDCl<sub>3</sub>, 100 MHz

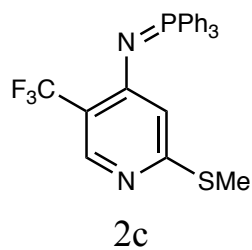

162.87  
156.89  
147.23  
147.21  
147.17  
147.15  
132.52  
132.42  
132.40  
132.37  
129.71  
129.01  
128.88  
128.70  
126.61  
126.60  
123.89  
121.19  
117.63  
117.40  
117.36  
117.13  
117.09  
116.86  
116.82  
116.58  
111.74  
111.62  
77.32  
77.00  
76.68

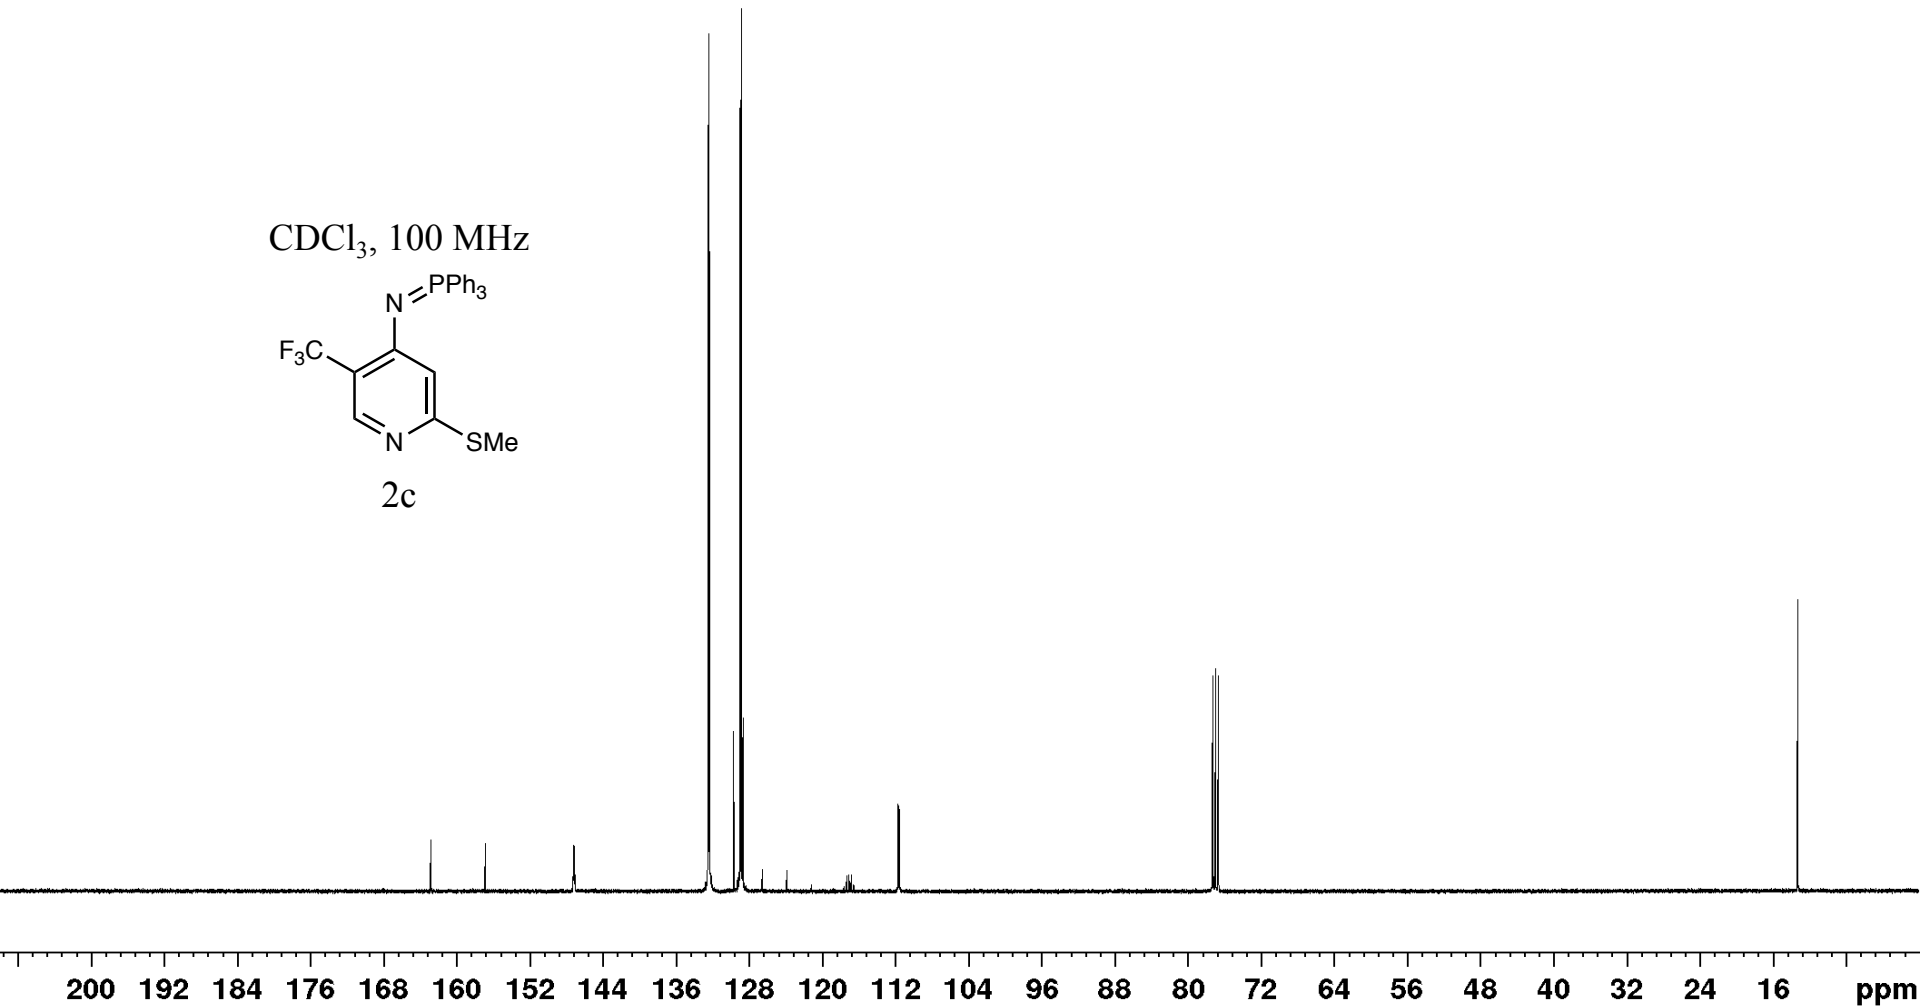

— 13.29

-62.23

CDCl<sub>3</sub>, 365 MHz

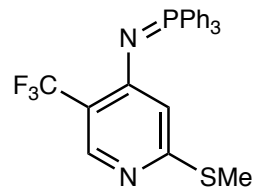

2c

10 0 -10 -20 -30 -40 -50 -60 -70 -80 -90 -100 -110 -120 -130 -140 -150 -160 -170 -180 ppm

CDCl<sub>3</sub>, 162 MHz

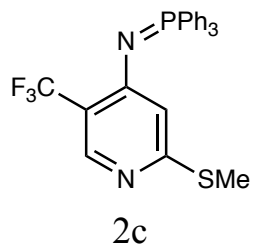

— 6.44

140 130 120 110 100 90 80 70 60 50 40 30 20 10 0 -10 -20 -30 ppm

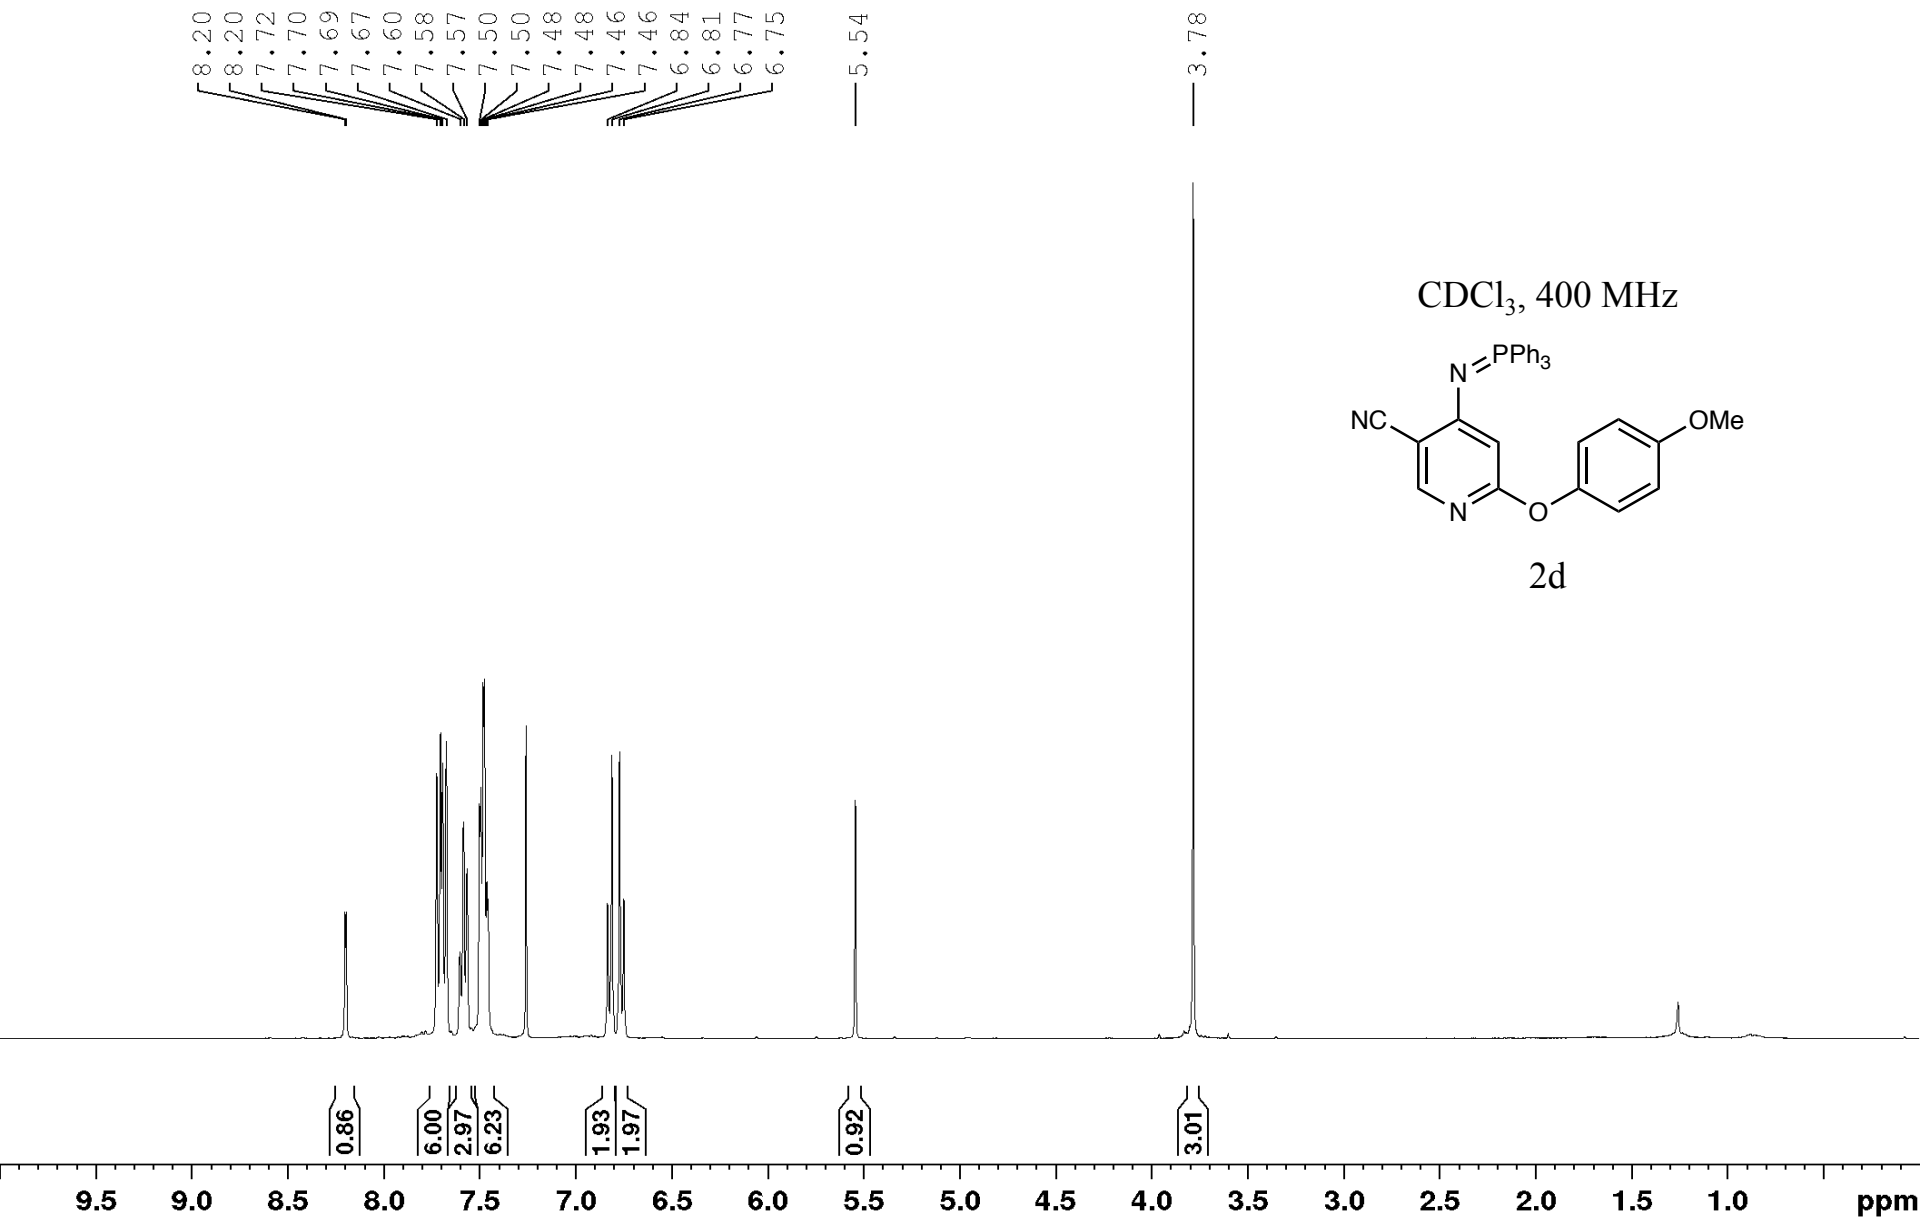

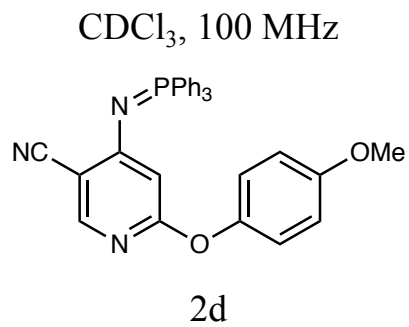

167.02  
 163.38  
 156.51  
 153.09  
 153.06  
 146.82  
 132.59  
 132.56  
 132.49  
 129.07  
 128.94  
 128.57  
 127.56  
 122.26  
 118.63  
 114.56  
 102.29  
 102.02  
 99.45  
 99.33  
 77.32  
 77.20  
 77.00  
 76.68  
 55.54

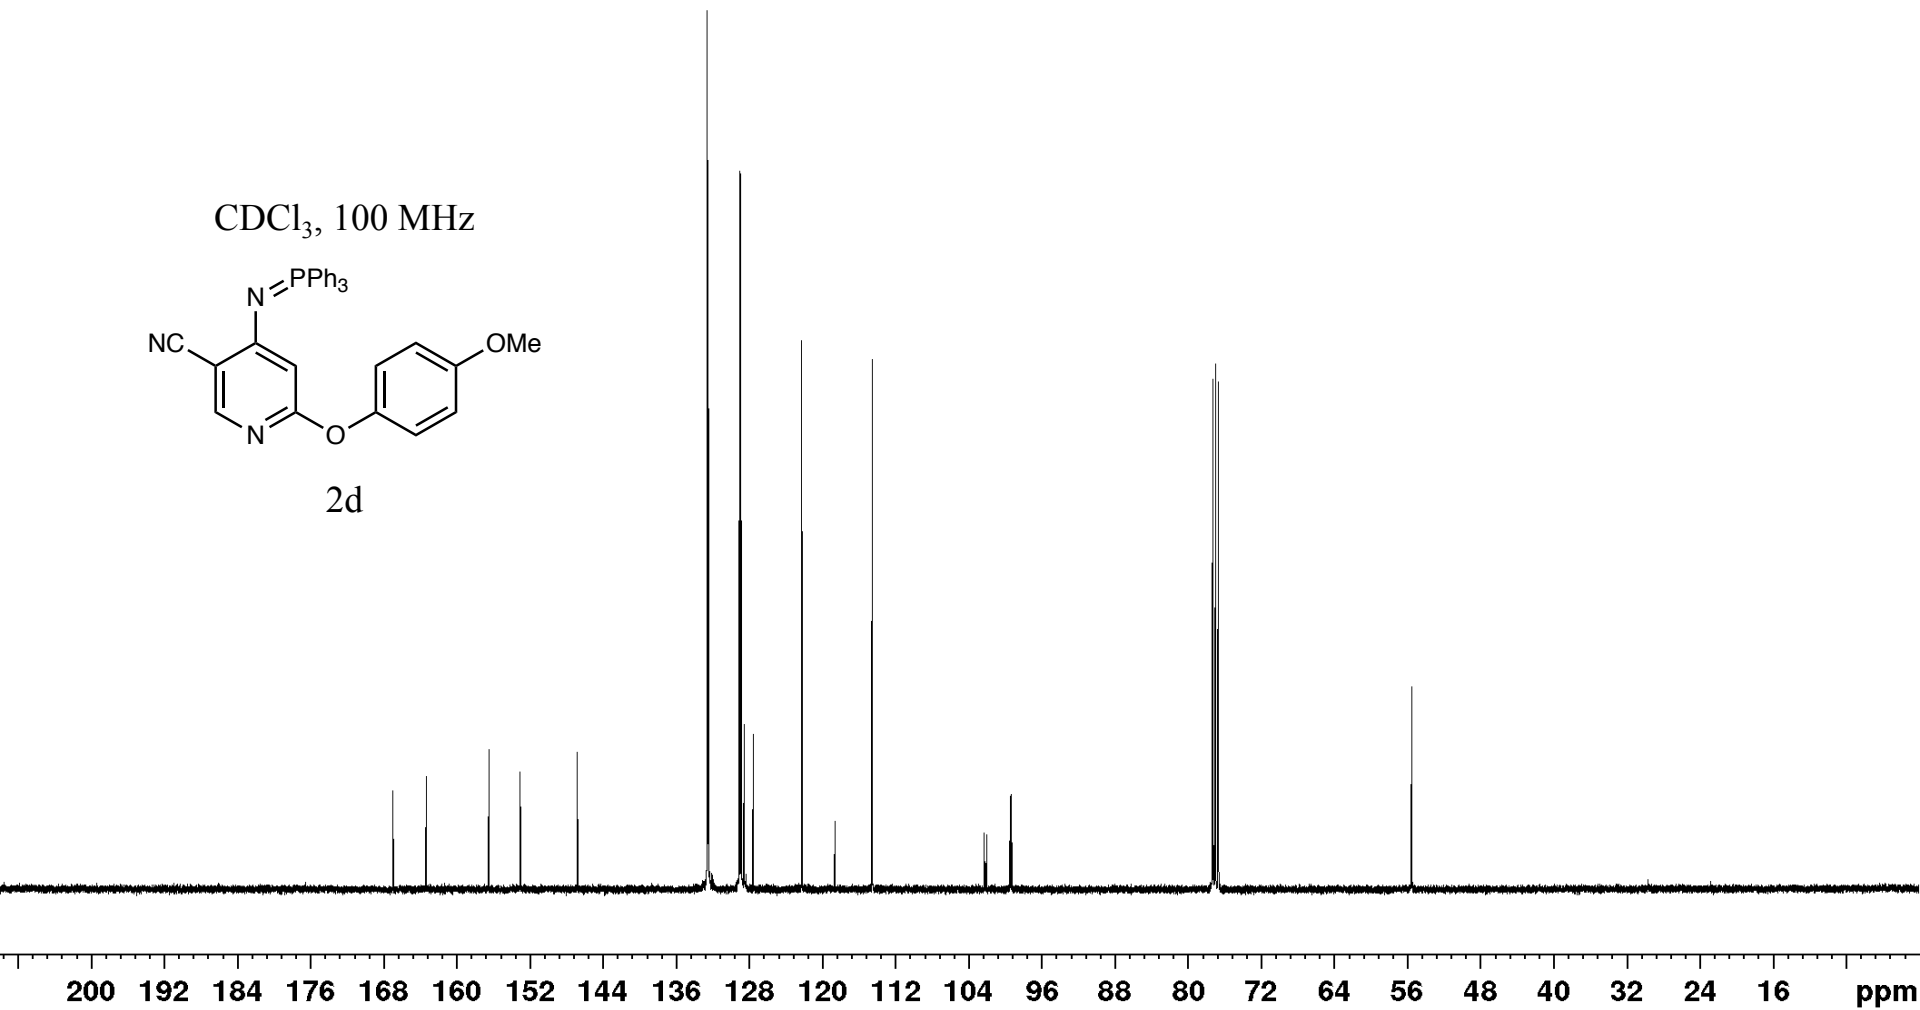

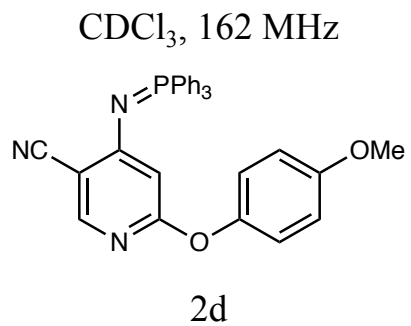

— 9.17

140 130 120 110 100 90 80 70 60 50 40 30 20 10 0 -10 -20 -30 ppm



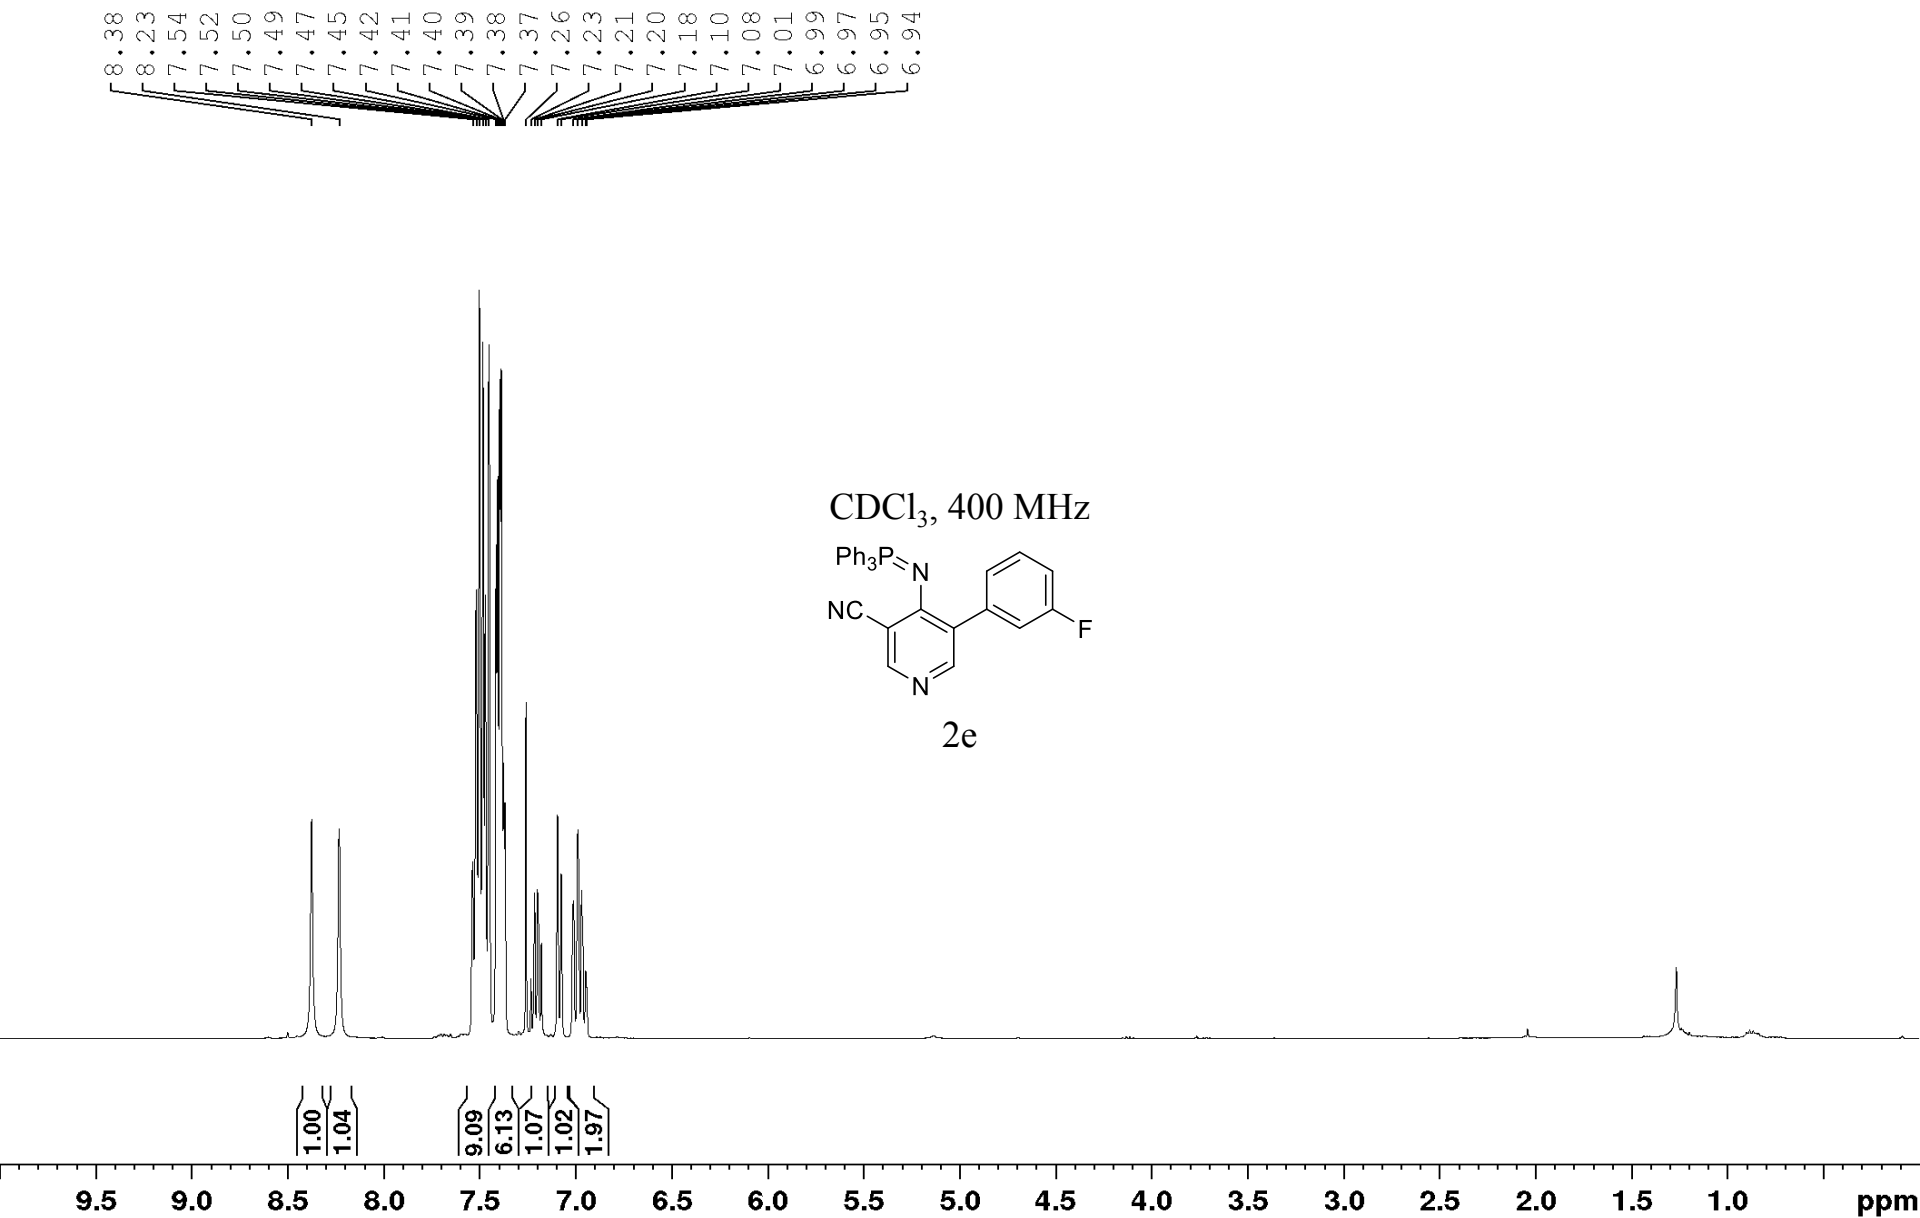

CDCl<sub>3</sub>, 100 MHz

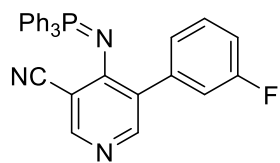

2e

163.56  
161.12  
157.64  
157.61  
154.09  
154.08  
151.84  
139.94  
139.86  
133.11  
132.99  
132.45  
132.34  
132.03  
132.01  
130.61  
129.56  
129.48  
129.39  
128.61  
128.48  
125.55  
125.52  
119.12  
119.11  
117.05  
116.84  
114.04  
113.83  
105.25  
105.18  
77.32  
77.20  
77.00  
76.68

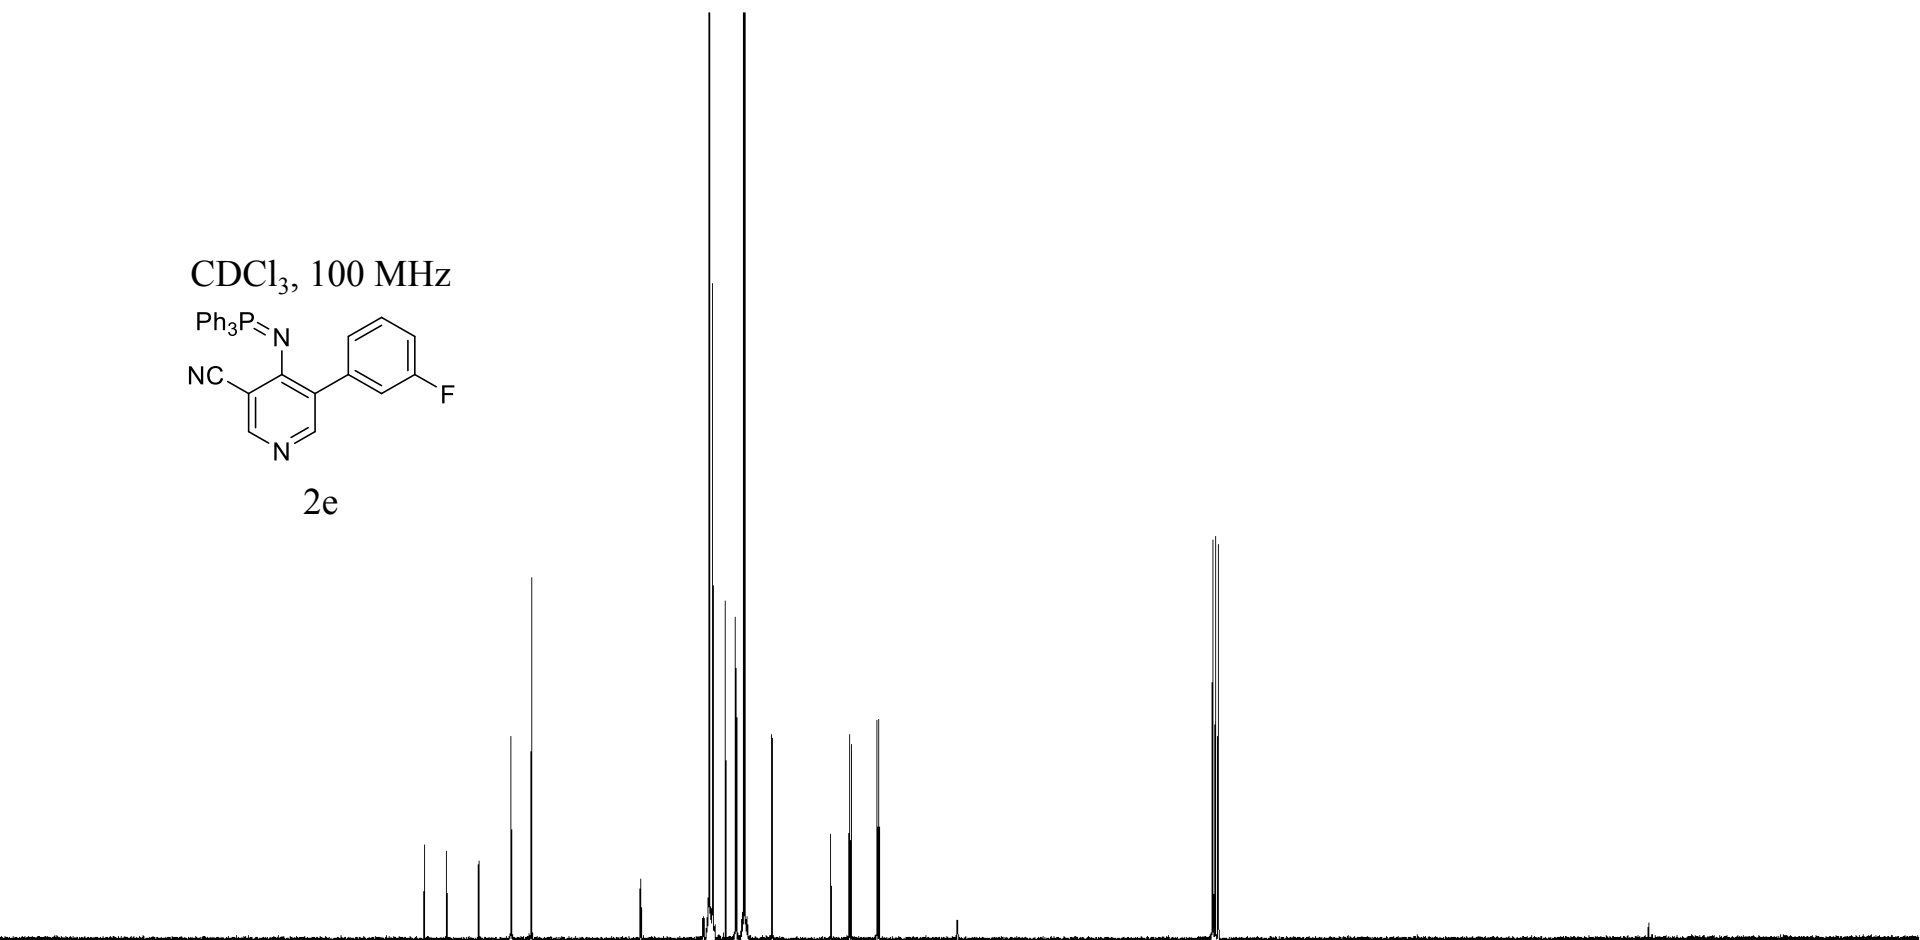

200 192 184 176 168 160 152 144 136 128 120 112 104 96 88 80 72 64 56 48 40 32 24 16 ppm

CDCl<sub>3</sub>, 365 MHz

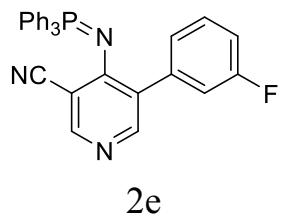

-113.69  
-113.70  
-113.71  
-113.72  
-113.74  
-113.76  
-113.77

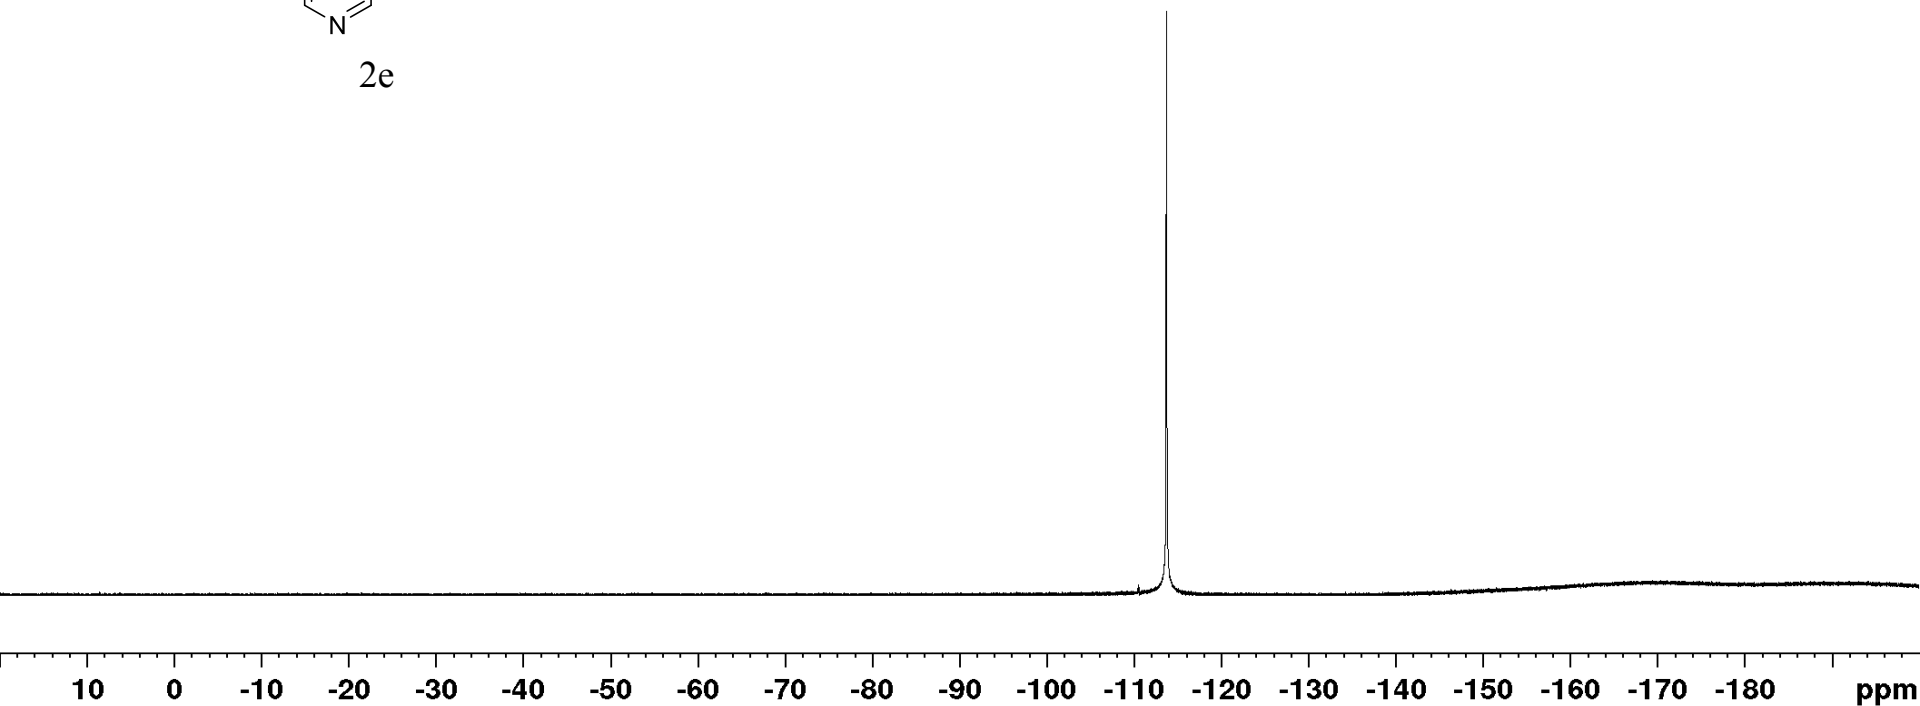

CDCl<sub>3</sub>, 162 MHz

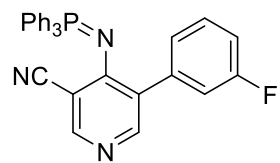

2e

4.88

140 130 120 110 100 90 80 70 60 50 40 30 20 10 0 -10 -20 -30 ppm

8.34  
8.33  
7.56  
7.54  
7.53  
7.51  
7.44  
7.43  
7.42  
7.42  
7.40  
7.40  
7.26  
7.25  
7.25  
7.23  
7.21  
7.21  
7.18  
7.17

CDCl<sub>3</sub>, 400 MHz

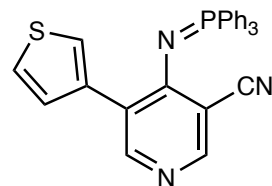

2f

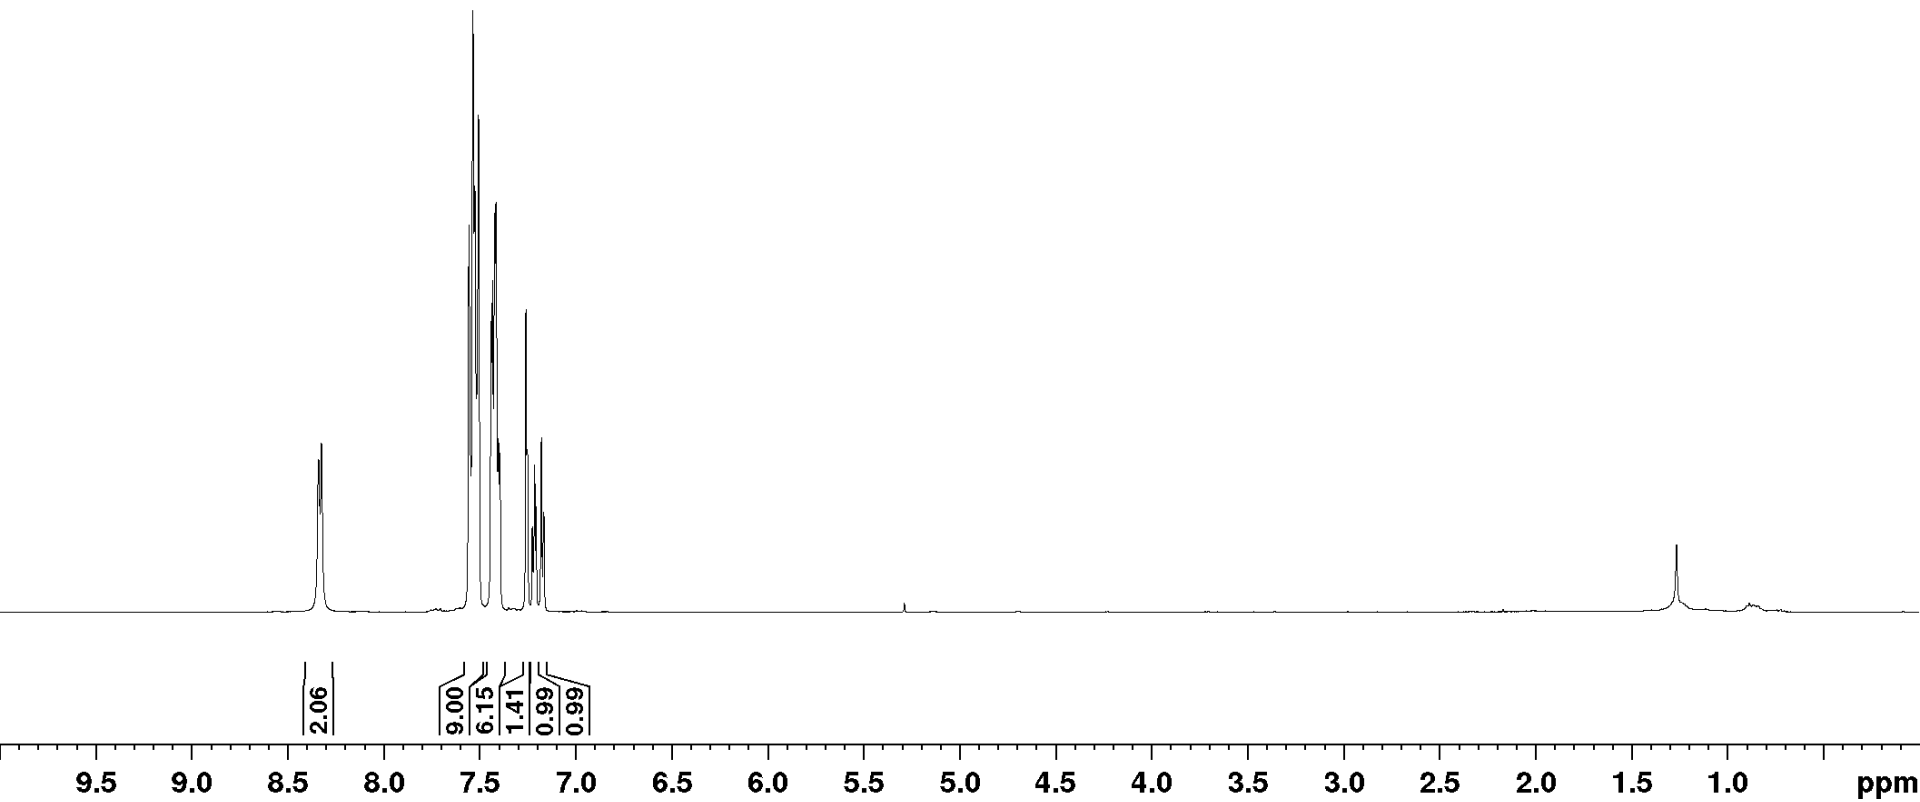

CDCl<sub>3</sub>, 100 MHz

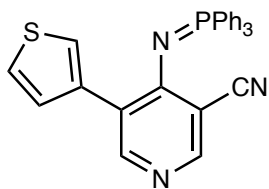

2f

157.62  
157.60  
153.68  
153.67  
151.83  
137.77  
132.56  
132.51  
132.46  
132.32  
132.04  
132.01  
130.83  
129.78  
129.31  
128.63  
128.50  
124.53  
123.73  
119.29  
119.28  
104.79  
104.73

77.32  
77.20  
77.00  
76.68

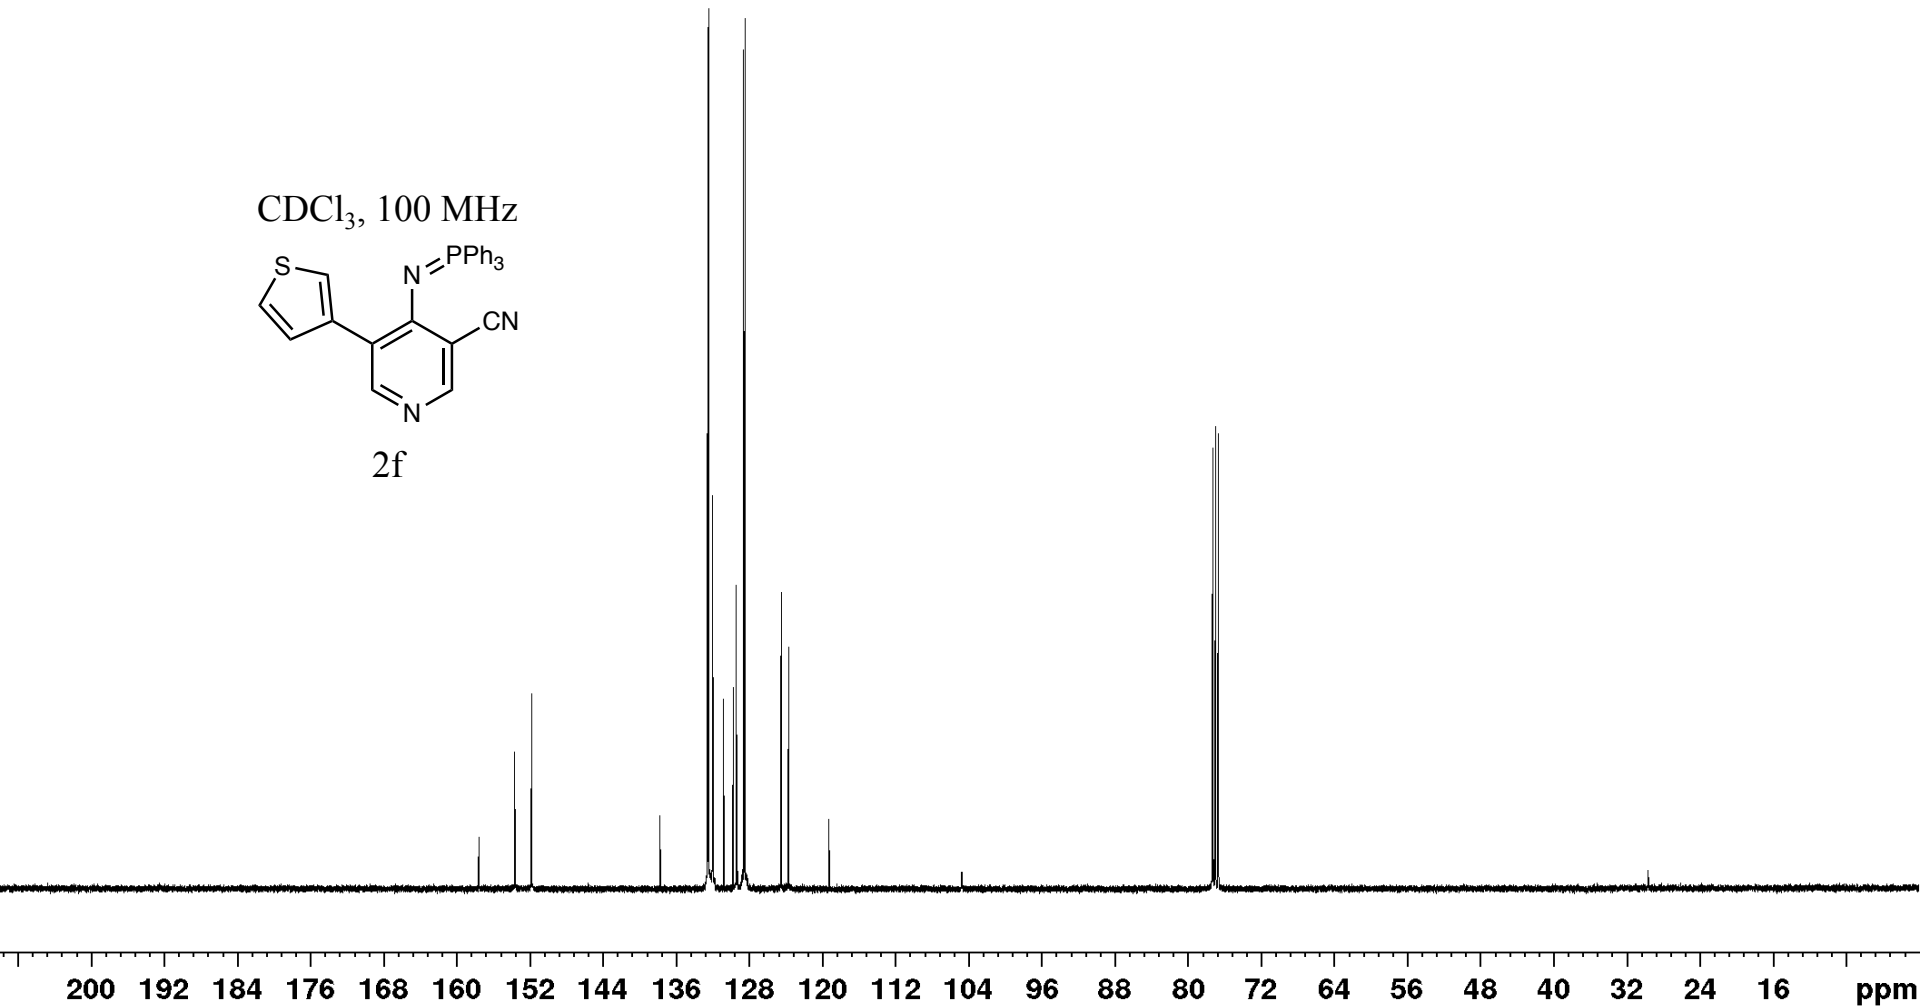

CDCl<sub>3</sub>, 162 MHz

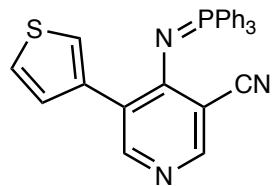

2f

— 4.99

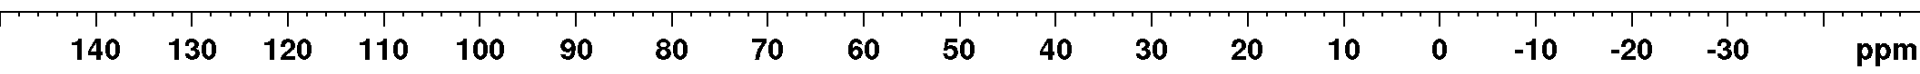

7.91  
7.90  
7.85  
7.83  
7.82  
7.80  
7.54  
7.52  
7.50  
7.46  
7.45  
7.44  
7.43  
7.42  
7.42  
7.26  
7.16  
6.61  
6.60

CDCl<sub>3</sub>, 400 MHz

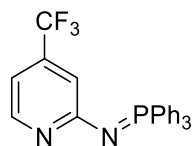

2g

1.01  
5.91  
3.02  
5.99  
0.90  
0.98

9.5 9.0 8.5 8.0 7.5 7.0 6.5 6.0 5.5 5.0 4.5 4.0 3.5 3.0 2.5 2.0 1.5 1.0 ppm



CDCl<sub>3</sub>, 100 MHz

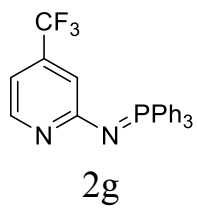

164.28  
164.22  
147.97  
138.92  
138.87  
138.60  
138.54  
133.13  
133.03  
131.70  
131.67  
131.43  
130.11  
129.11  
128.43  
128.30  
124.89  
124.87  
122.17  
122.15  
113.61  
113.57  
113.53  
113.49  
113.35  
113.31  
113.27  
113.23  
107.15  
107.12  
107.09  
107.05  
77.32  
77.20  
77.00  
76.68

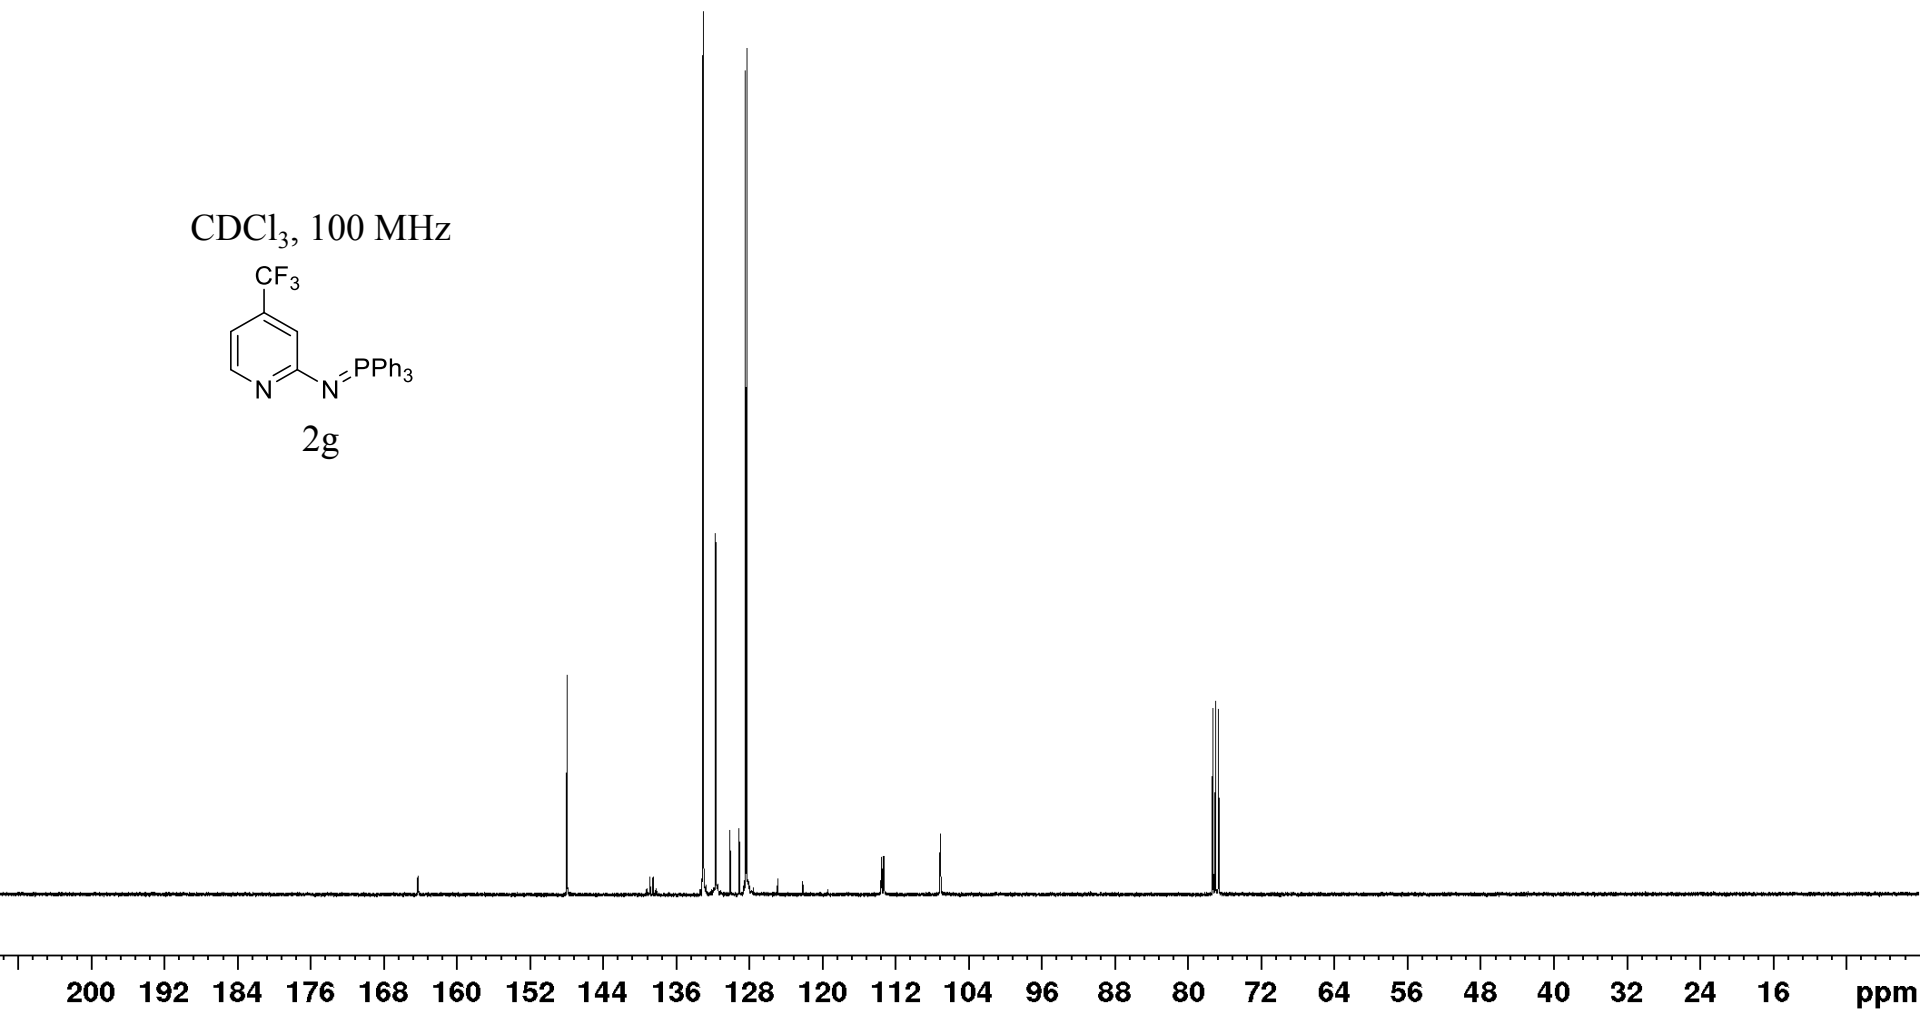

CDCl<sub>3</sub>, 162 MHz

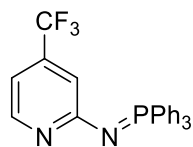

2g

14.85

140 130 120 110 100 90 80 70 60 50 40 30 20 10 0 -10 -20 -30 ppm

CDCl<sub>3</sub>, 365 MHz

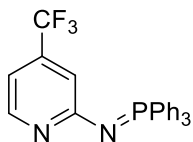

2g

-65.09  
-65.10

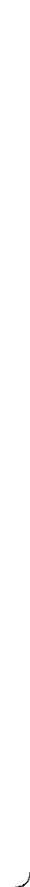

10 0 -10 -20 -30 -40 -50 -60 -70 -80 -90 -100 -110 -120 -130 -140 -150 -160 -170 -180 ppm

7.96  
7.94  
7.93  
7.91  
7.73  
7.71  
7.51  
7.50  
7.48  
7.45  
7.44  
7.43  
7.42  
7.41  
7.41  
7.37  
7.35  
7.33  
7.32  
7.30  
7.14  
7.13  
7.11  
7.09

— 2.54

CDCl<sub>3</sub>, 400 MHz

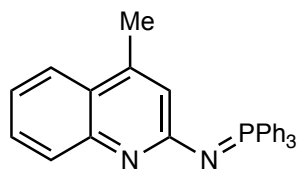

2h

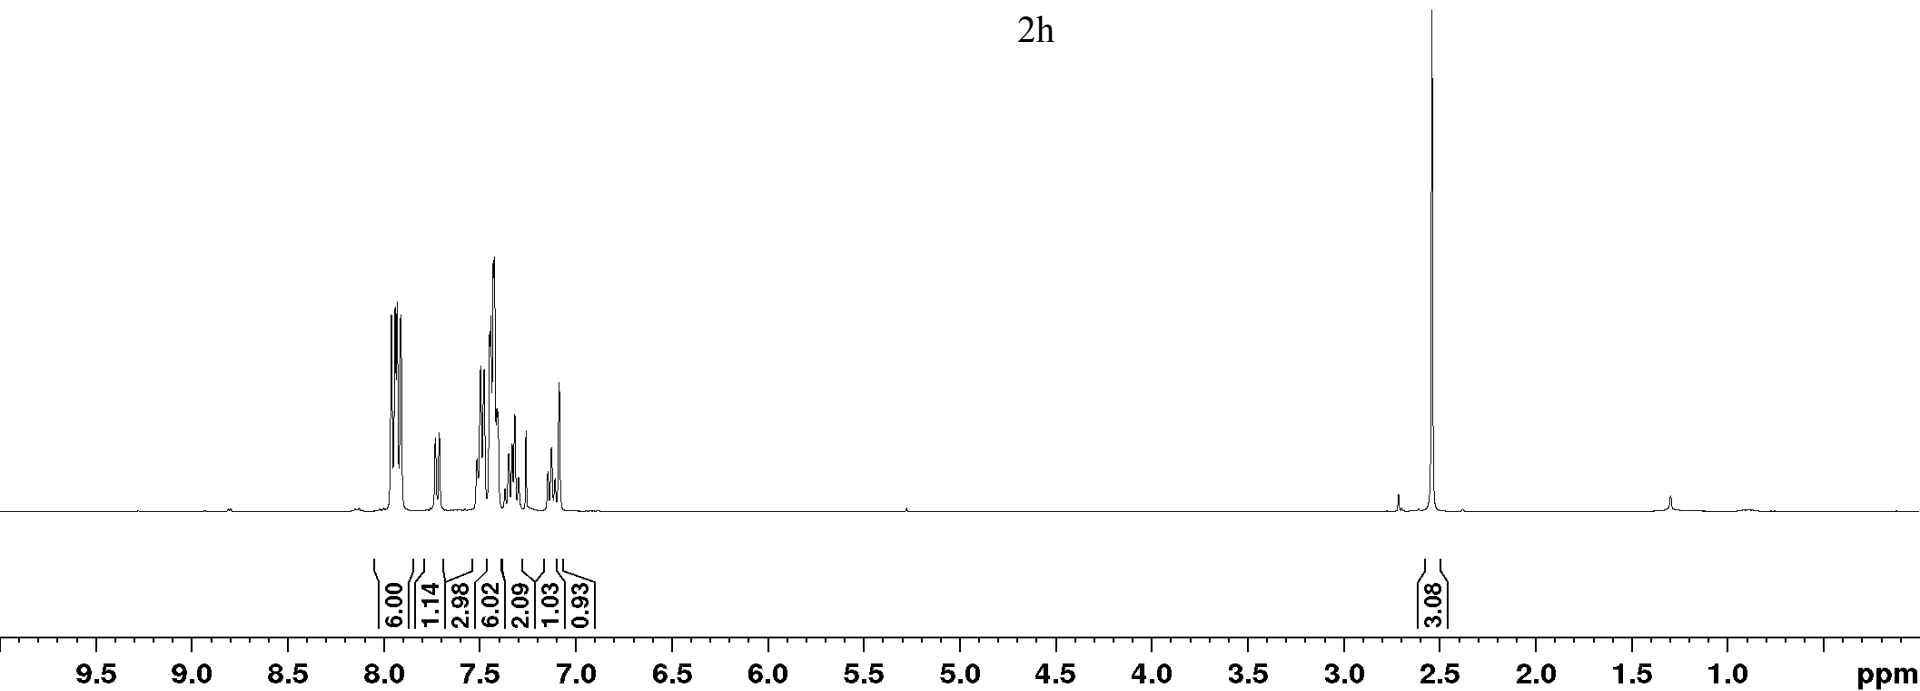

157.62  
157.60  
153.68  
153.67  
151.83  
137.77  
132.56  
132.51  
132.46  
132.32  
132.04  
132.01  
130.83  
129.78  
129.31  
128.63  
128.50  
124.53  
123.73  
119.29  
119.28  
104.79  
104.73  
77.32  
77.20  
77.00  
76.68

CDCl<sub>3</sub>, 100 MHz

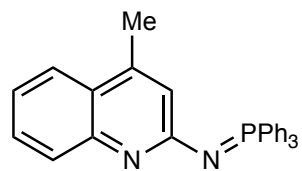

2h

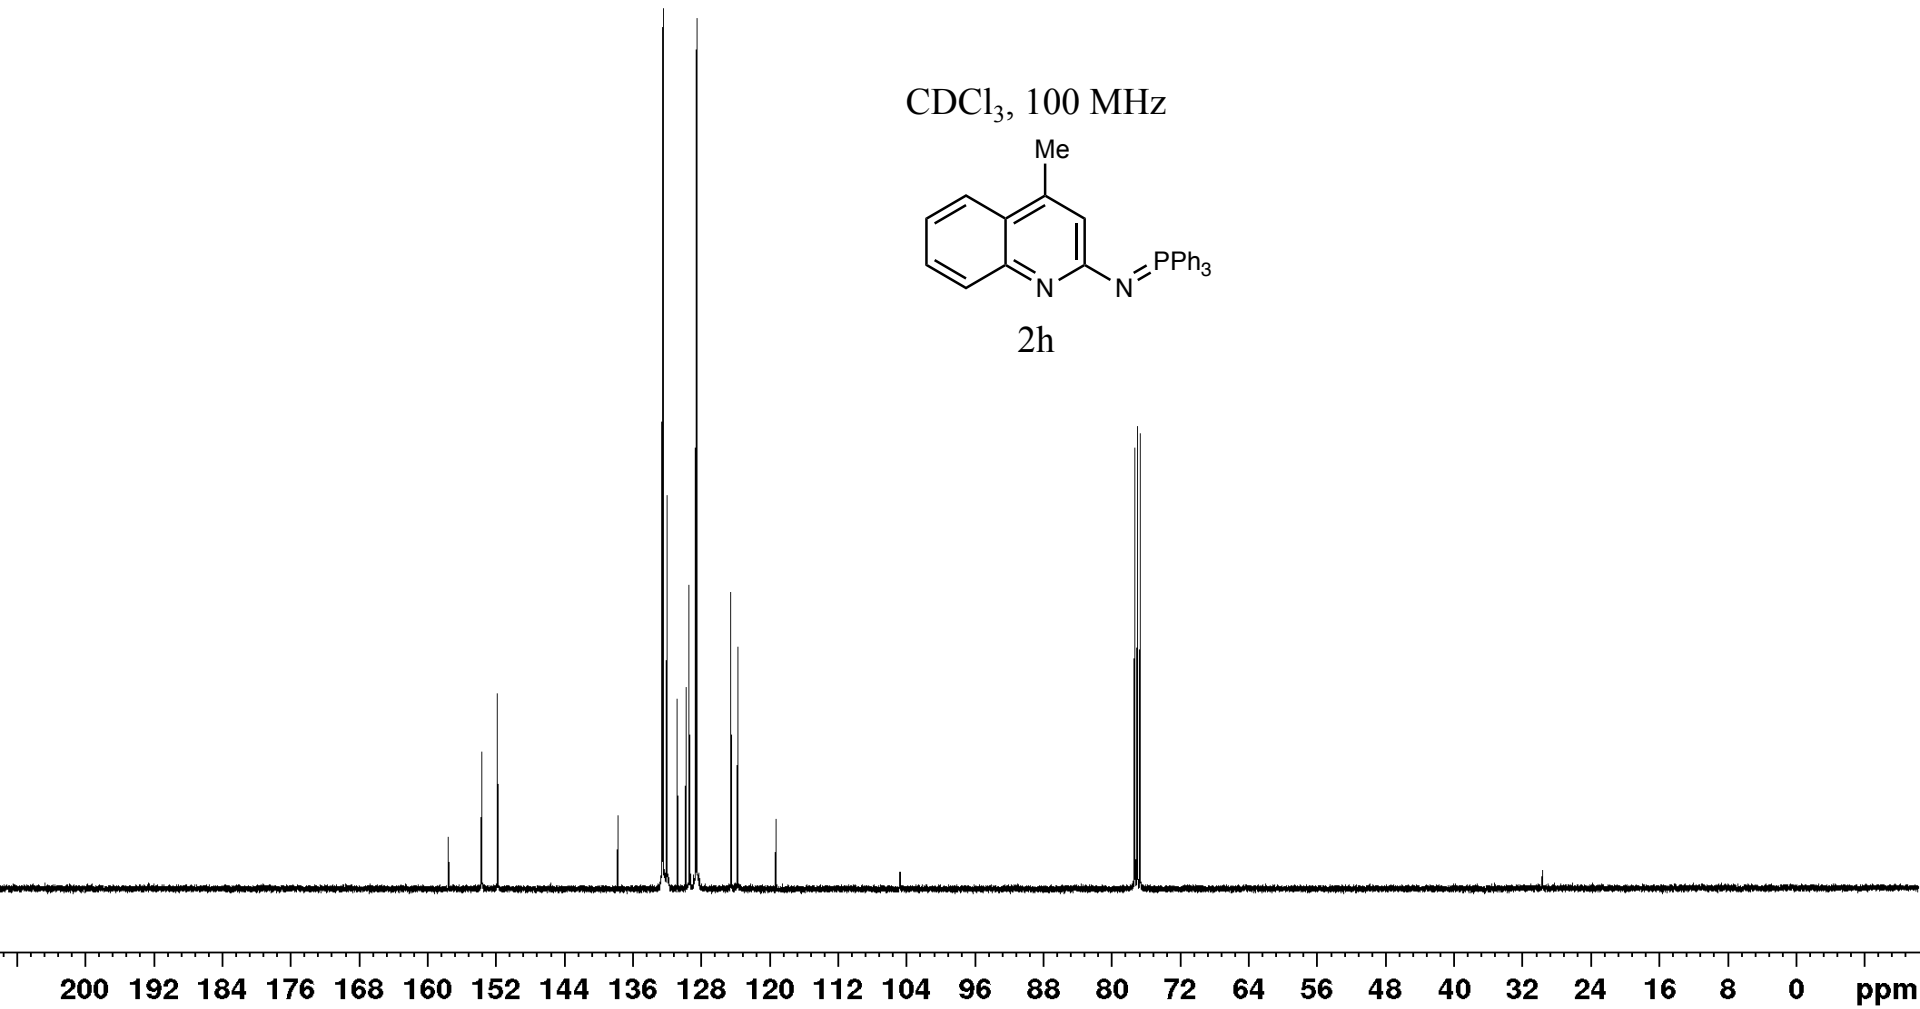

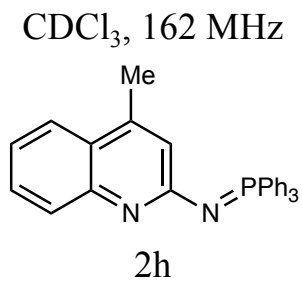

—15.96

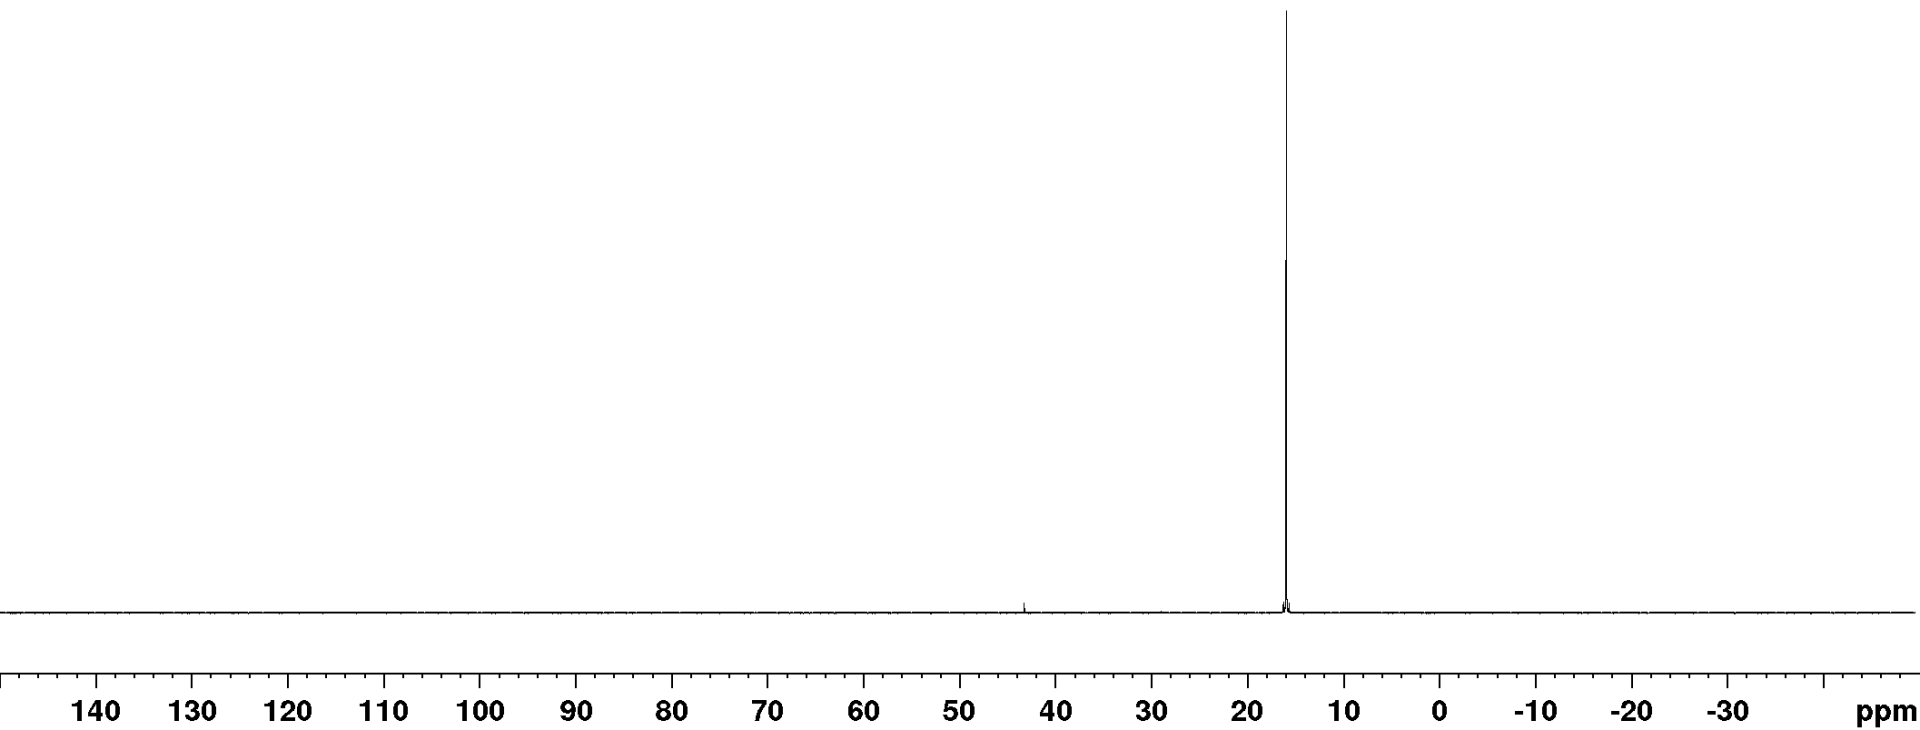

8.28  
7.81  
7.80  
7.79  
7.78  
7.77  
7.76  
7.67  
7.67  
7.65  
7.64  
7.53  
7.51  
7.50  
7.45  
7.44  
7.43  
7.42  
7.41  
7.41  
7.25

CDCl<sub>3</sub>, 400 MHz

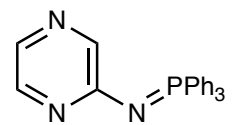

2i

0.88

6.00

2.07

3.01

6.18

9.5 9.0 8.5 8.0 7.5 7.0 6.5 6.0 5.5 5.0 4.5 4.0 3.5 3.0 2.5 2.0 1.5 1.0 ppm

CDCl<sub>3</sub>, 100 MHz

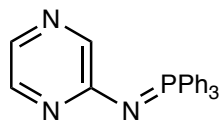

2i

160.22  
160.16  
142.02  
141.77  
140.99  
133.07  
132.97  
131.84  
131.83  
131.80  
129.84  
128.84  
128.50  
128.37

77.32  
77.20  
77.00  
76.68

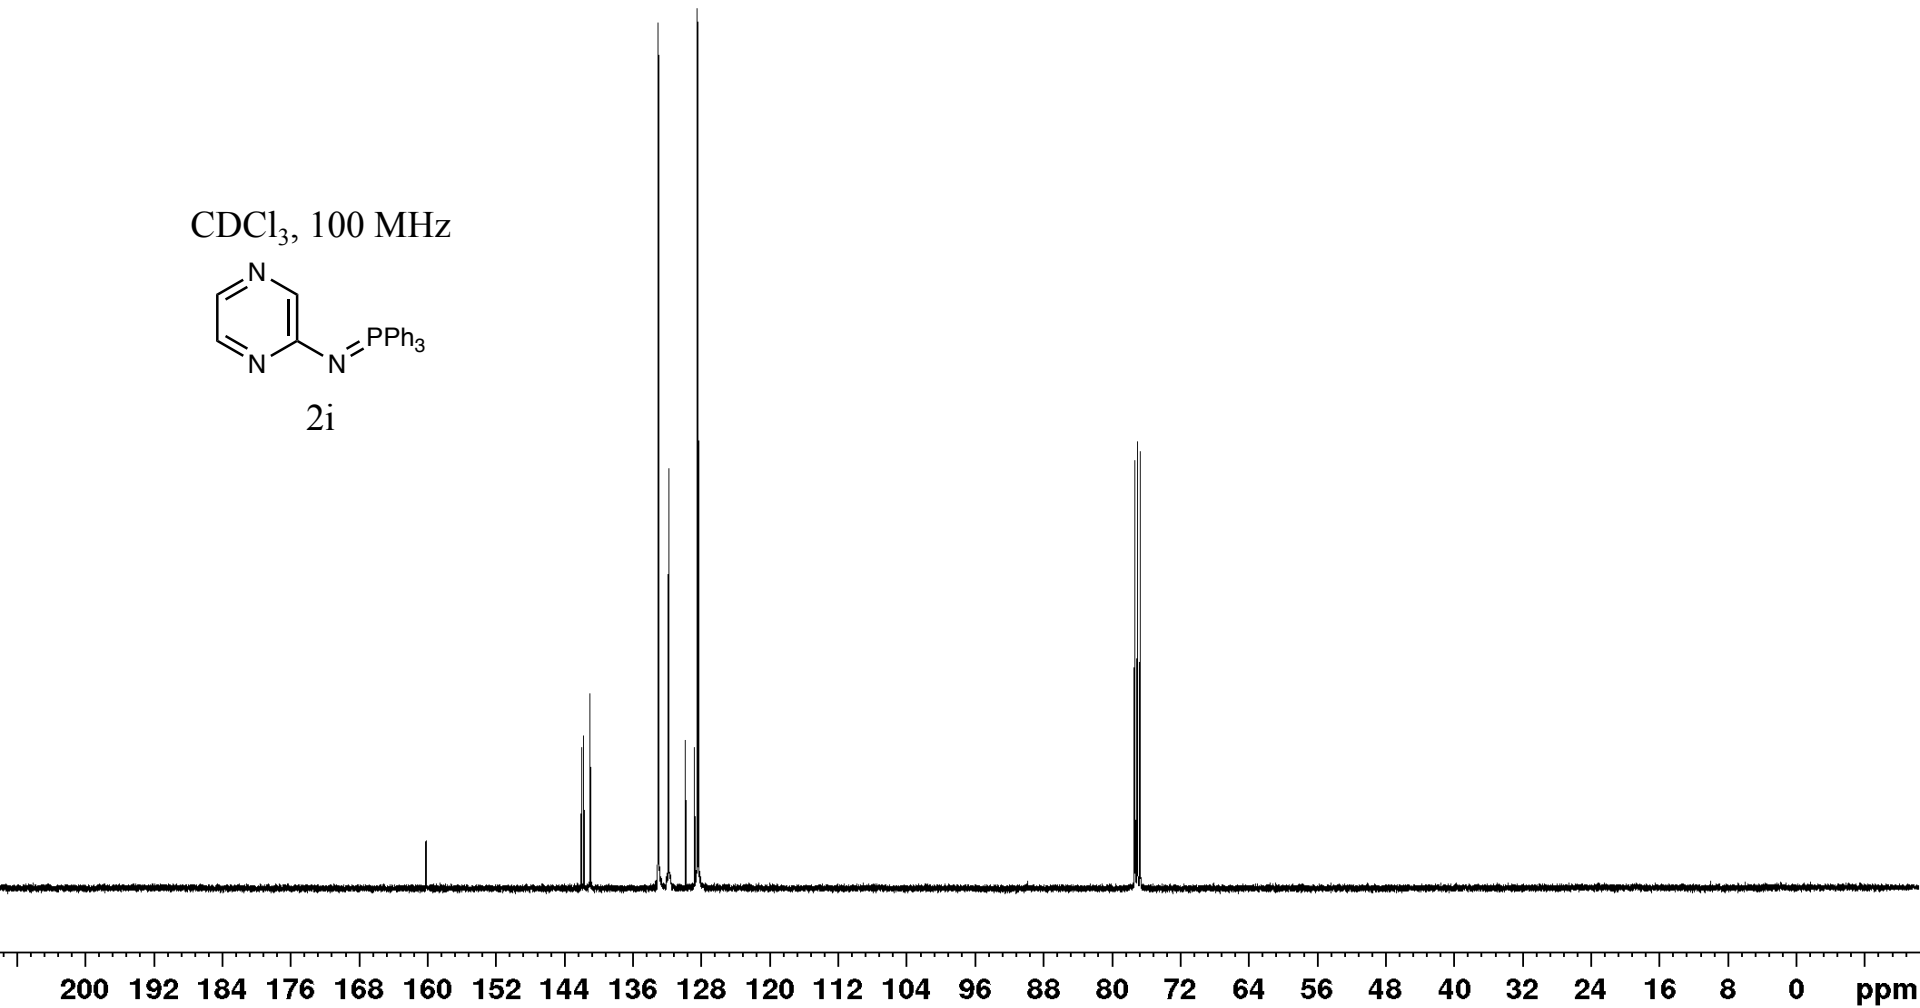



CDCl<sub>3</sub>, 162 MHz

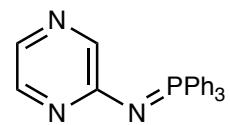

2i

15.85

140 130 120 110 100 90 80 70 60 50 40 30 20 10 0 -10 -20 -30 ppm

7.93  
7.91  
7.91  
7.90  
7.88  
7.88  
7.82  
7.80  
7.55  
7.53  
7.51  
7.51  
7.47  
7.47  
7.47  
7.45  
7.45  
7.45  
7.44  
7.43  
7.43  
7.39  
7.37  
7.37  
7.35  
7.31  
7.29  
7.24  
7.23  
7.22

CDCl<sub>3</sub>, 400 MHz

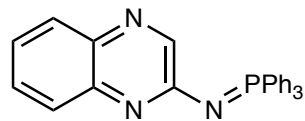

2j

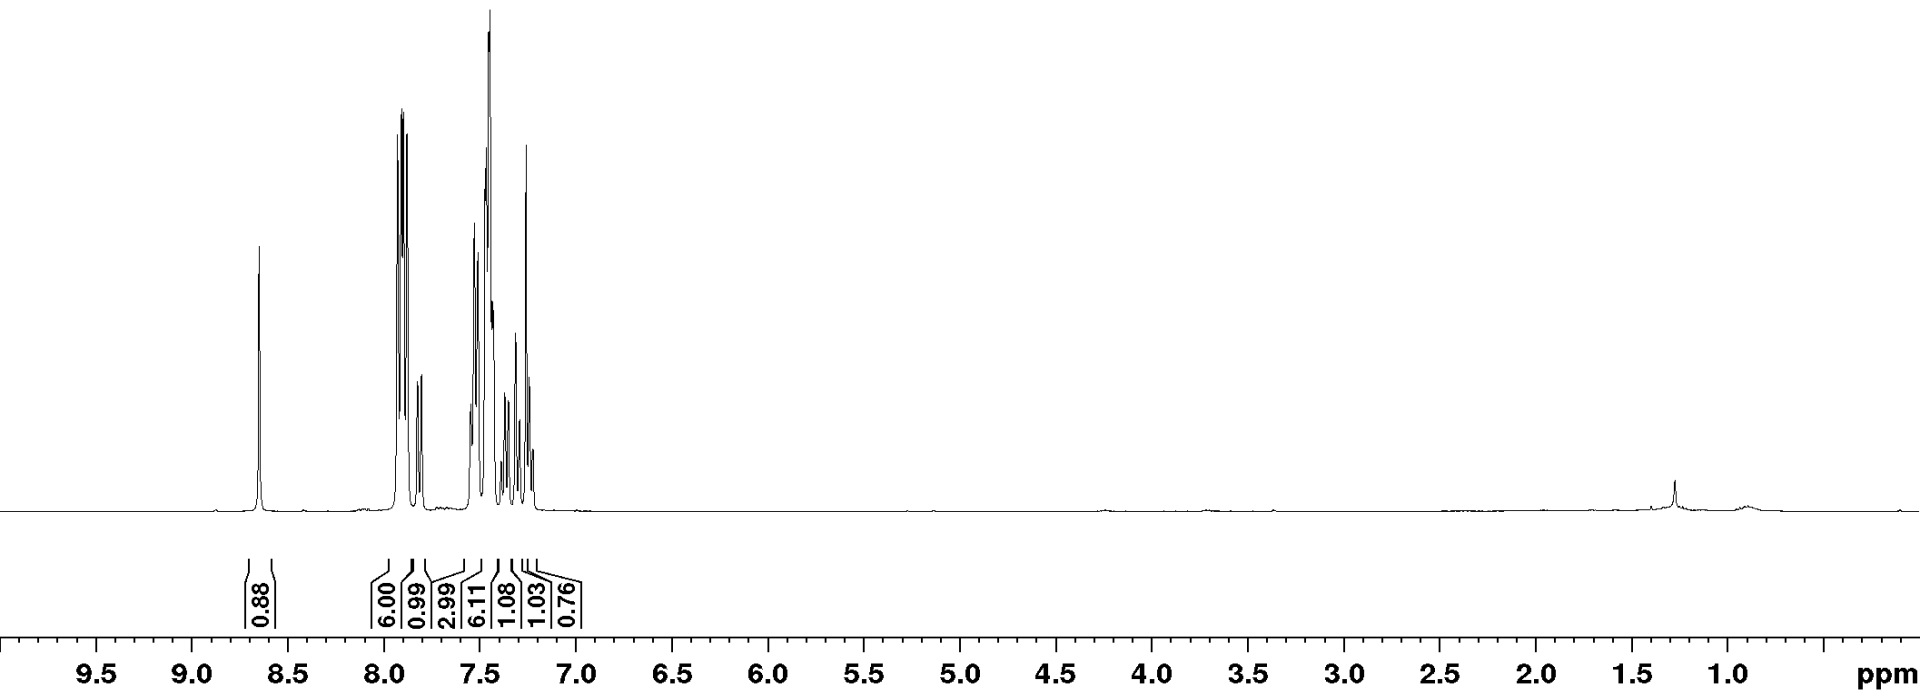

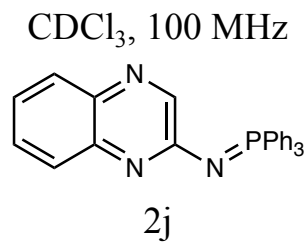

158.20  
158.13  
147.13  
146.86  
142.21  
136.82  
133.25  
133.16  
131.93  
131.90  
129.28  
128.49  
128.47  
128.40  
128.35  
128.29  
125.80  
123.30

77.32  
77.20  
77.00  
76.68

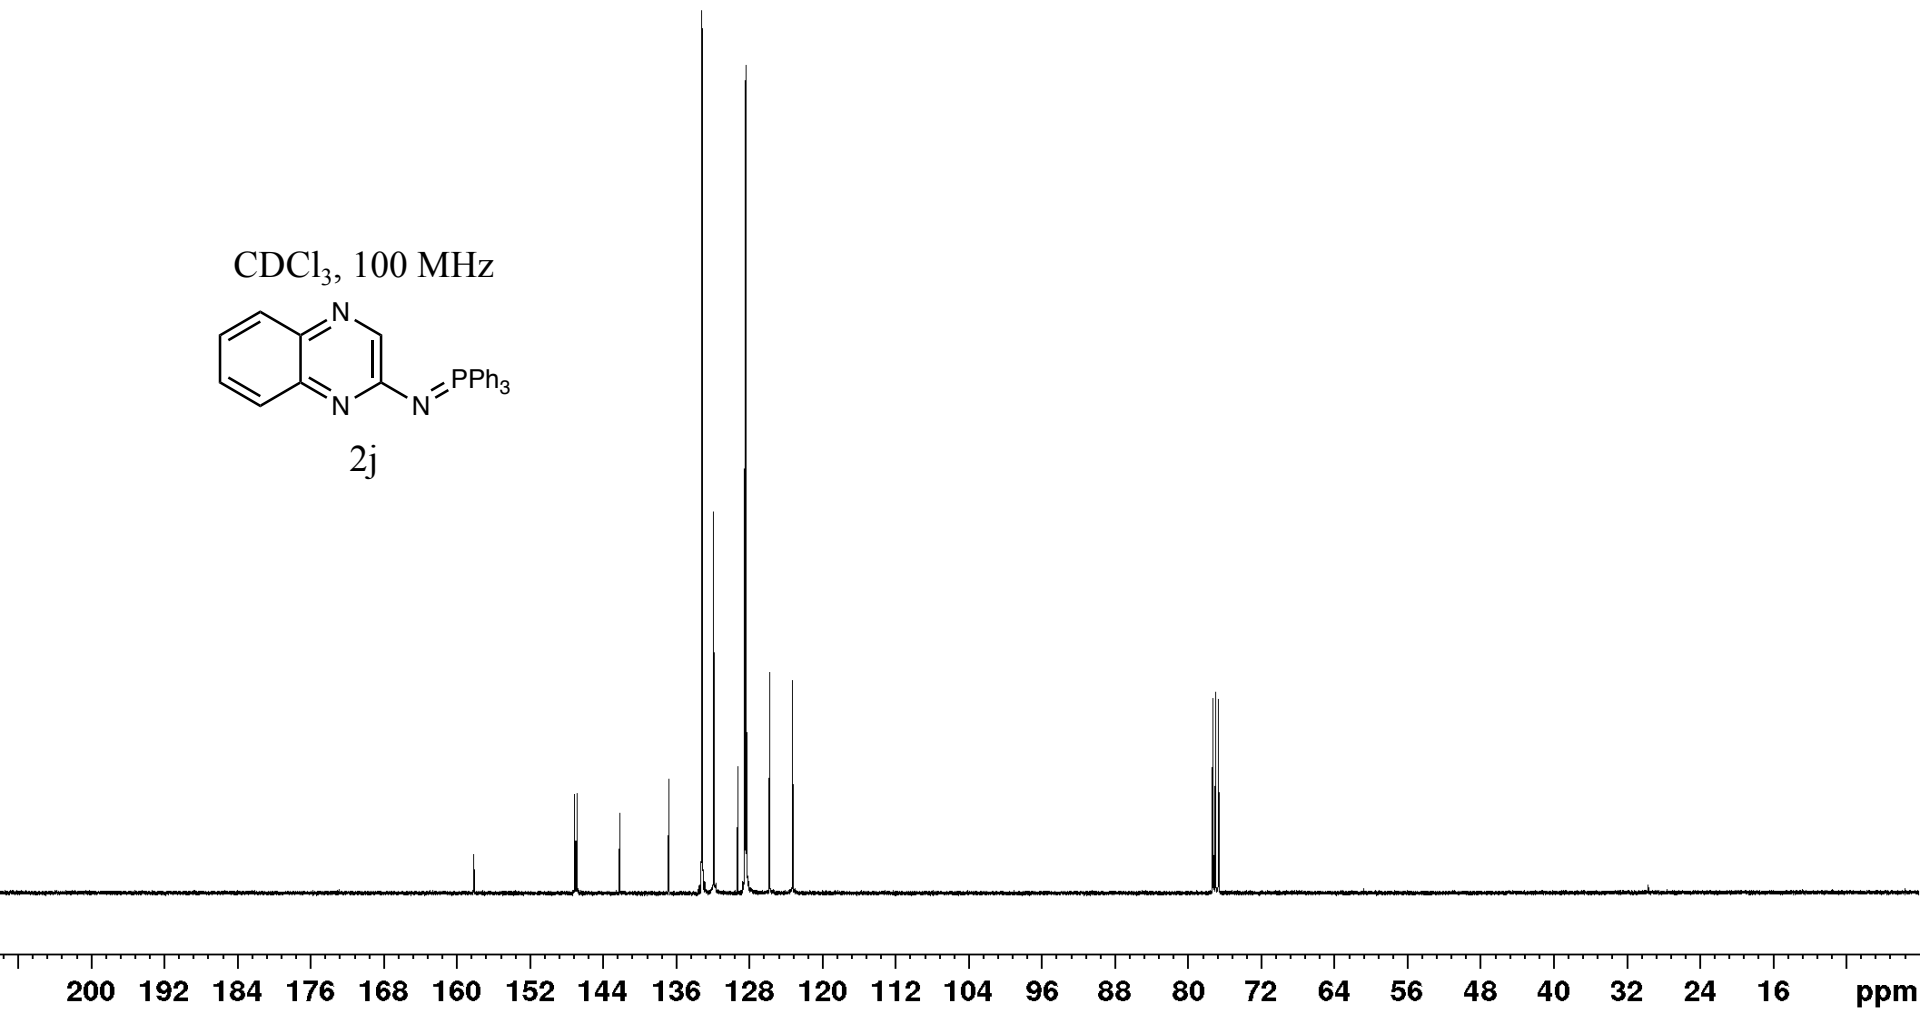

CDCl<sub>3</sub>, 162 MHz

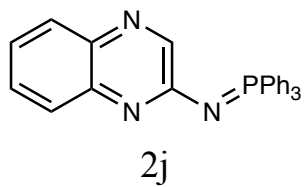

—17.82

140 130 120 110 100 90 80 70 60 50 40 30 20 10 0 -10 -20 -30 ppm

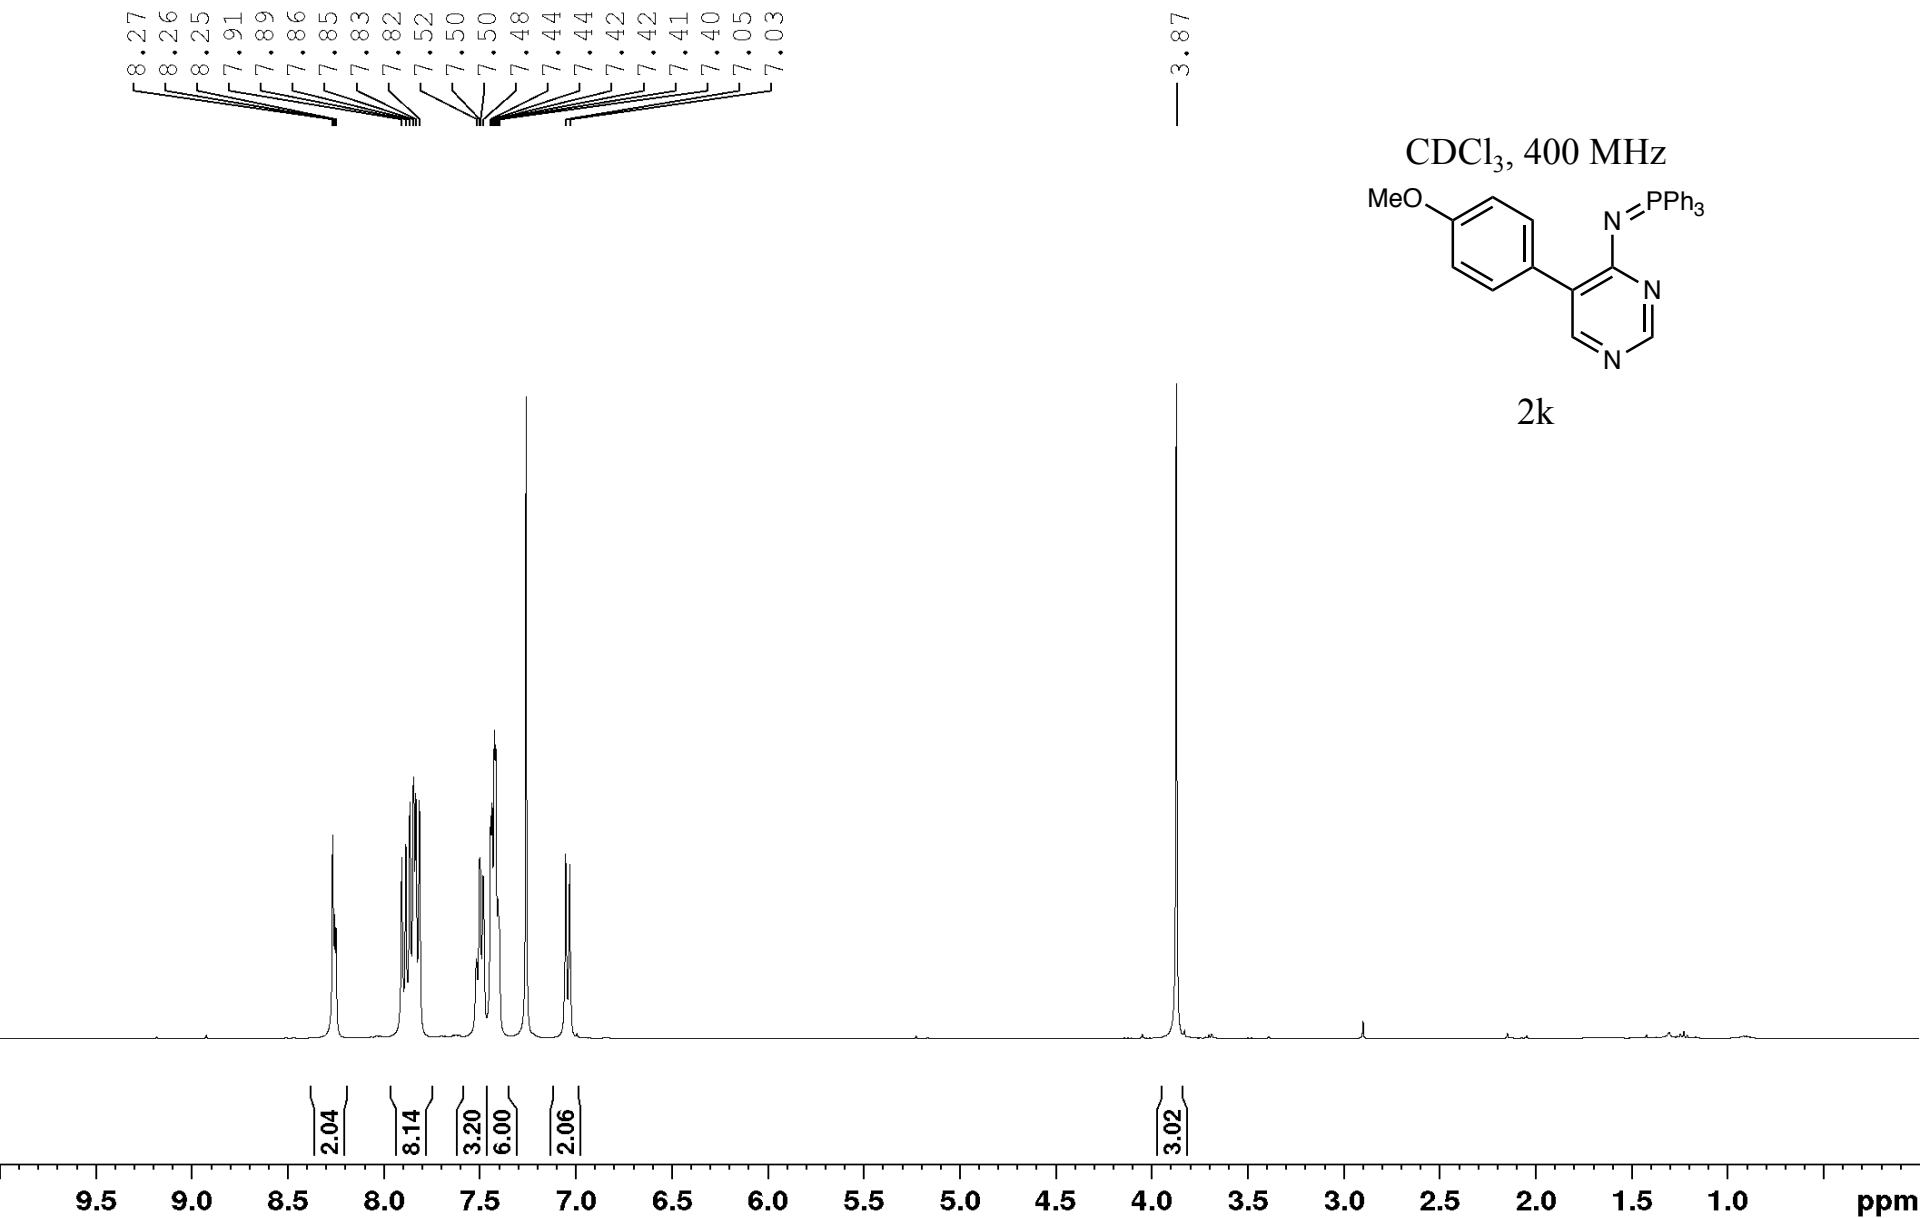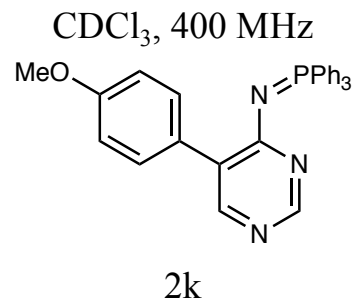

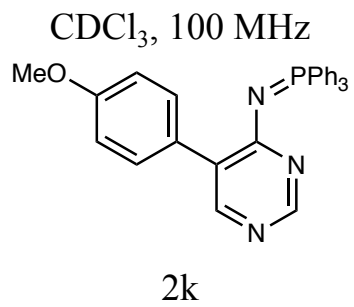

165.25  
165.18  
158.59  
155.84  
153.11  
153.08  
133.09  
132.99  
131.69  
131.66  
130.38  
129.65  
129.57  
128.57  
128.28  
128.16  
125.58  
125.36  
113.11

77.32  
77.20  
77.00  
76.68

55.12

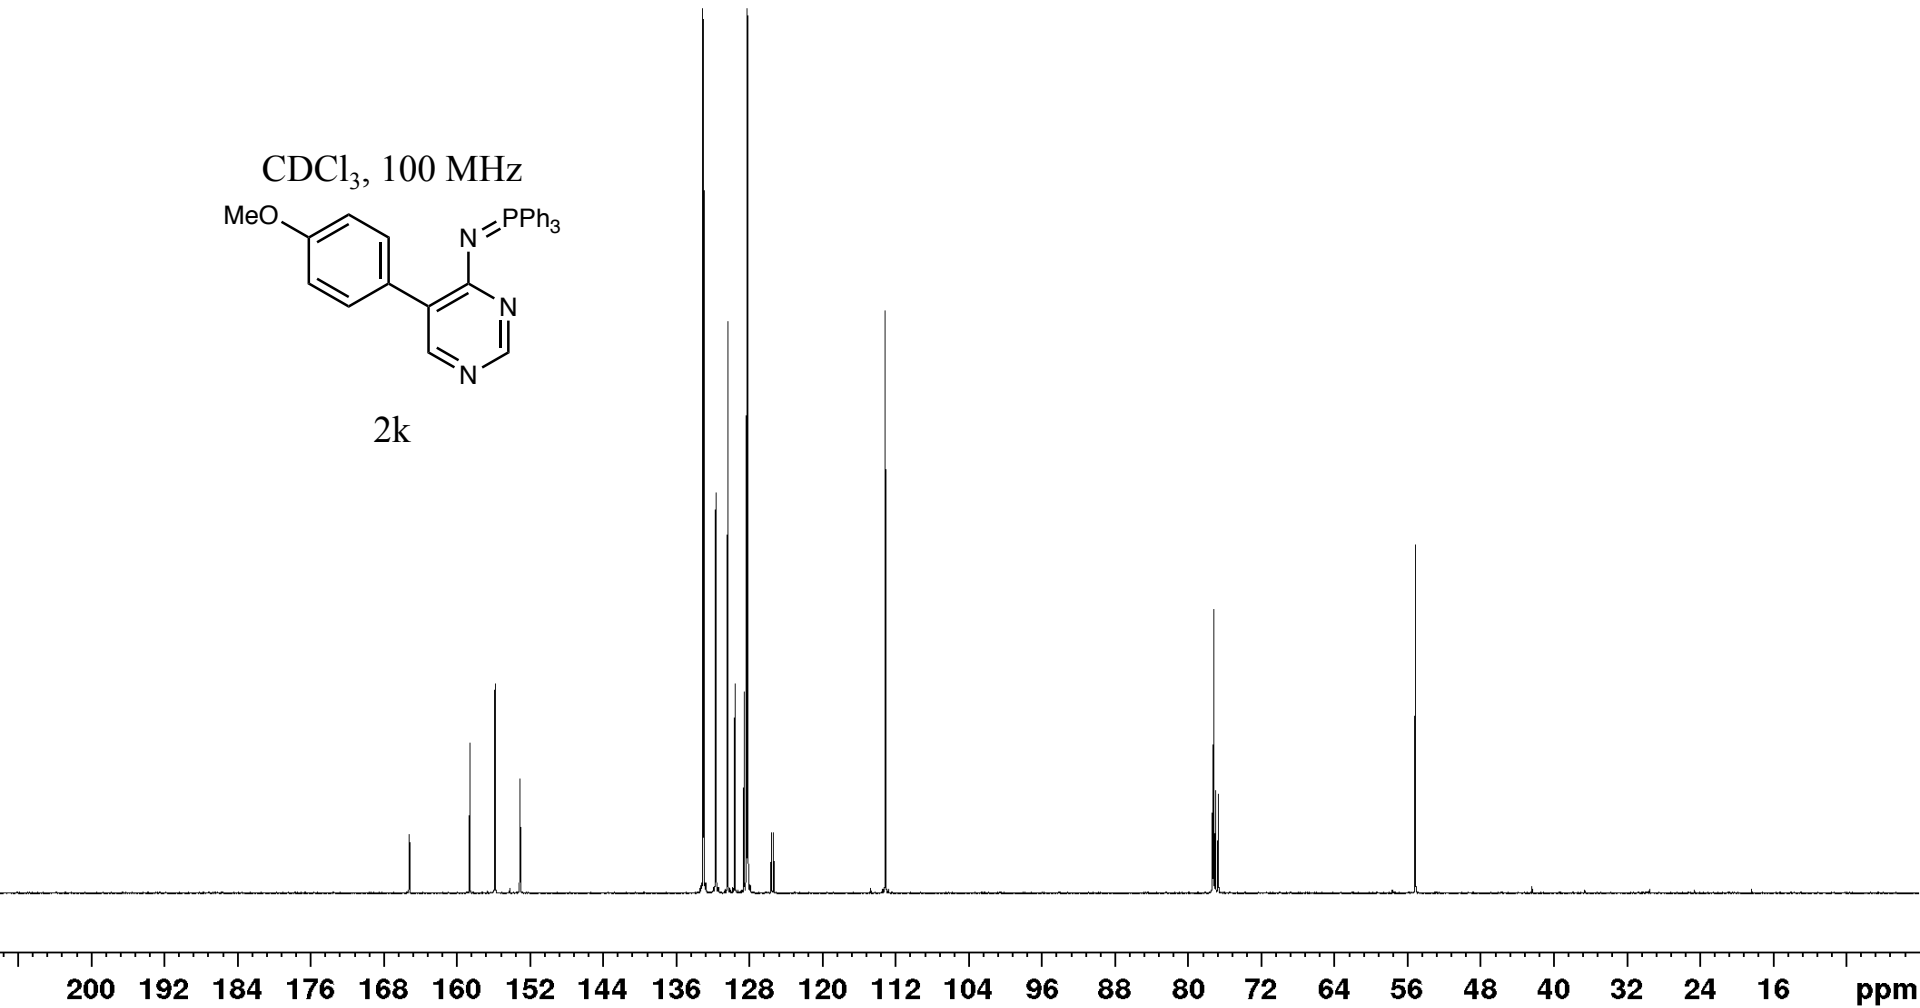

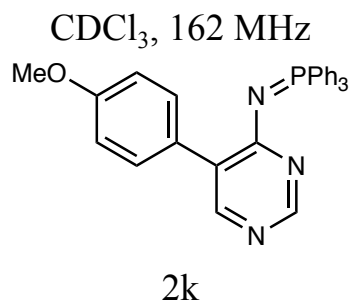

—15.99

140 130 120 110 100 90 80 70 60 50 40 30 20 10 0 -10 -20 -30 ppm

8.16  
8.15  
7.81  
7.79  
7.78  
7.76  
7.56  
7.54  
7.53  
7.47  
7.45  
7.45  
7.44

1.86

CDCl<sub>3</sub>, 400 MHz

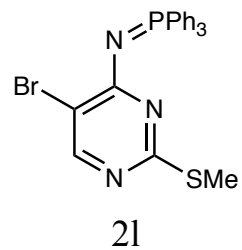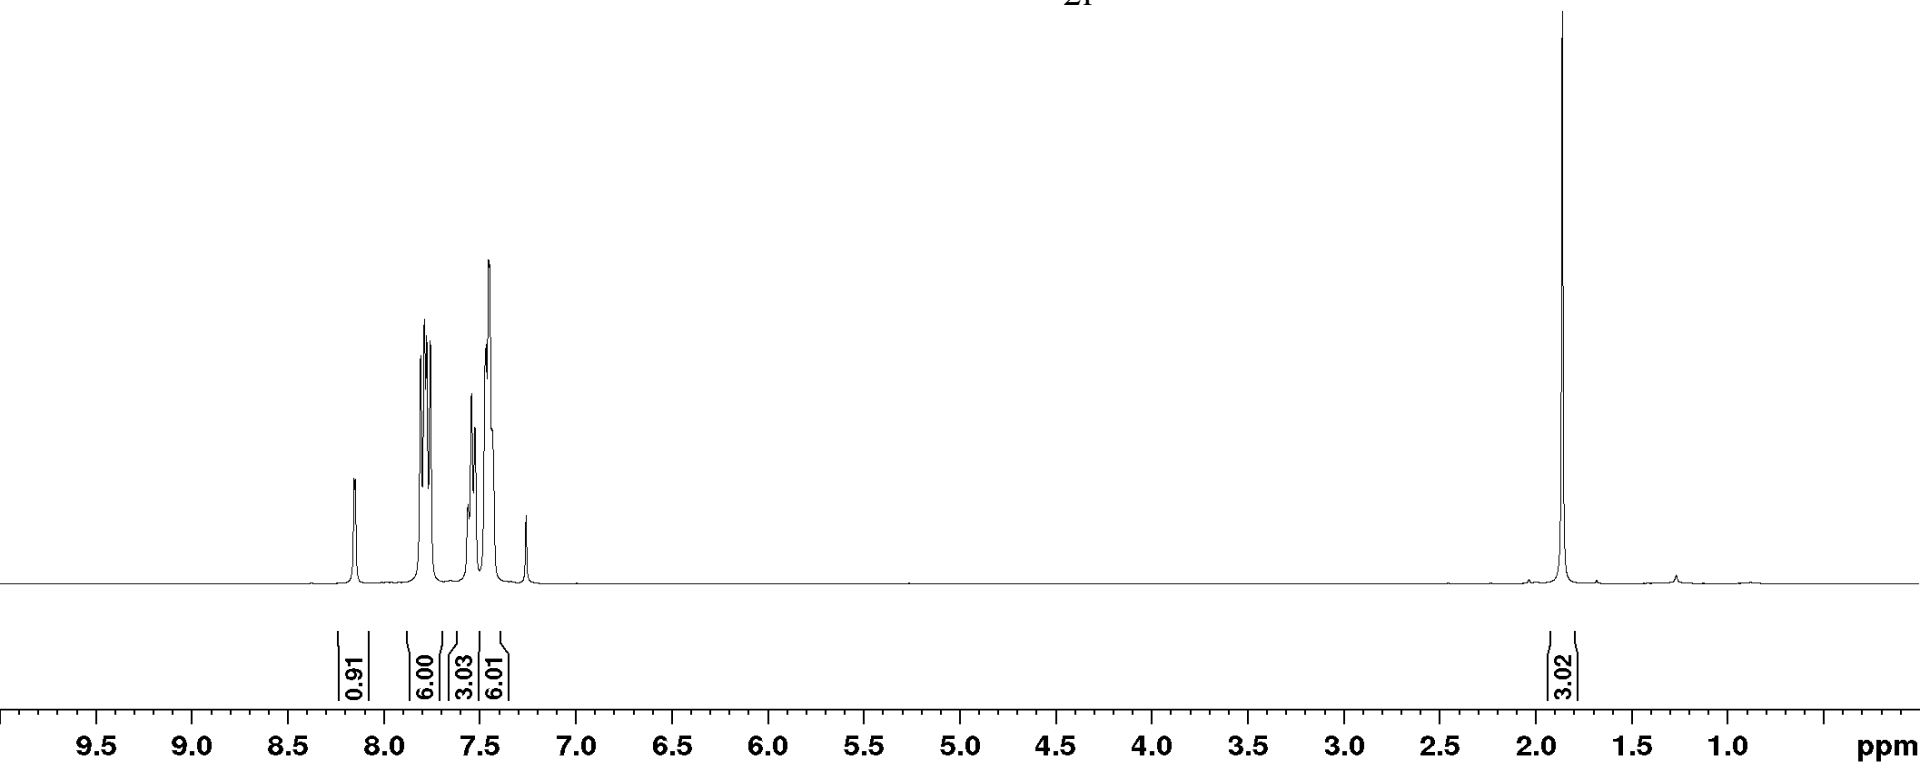



CDCl<sub>3</sub>, 100 MHz

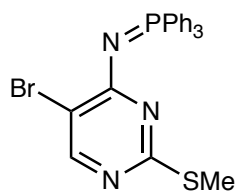

168.16  
168.16  
163.98  
163.93  
155.58  
155.55

132.93  
132.83  
132.18  
132.16  
128.88  
128.60  
128.48  
127.87

109.27  
109.01

77.32  
77.00  
76.68

— 13.50

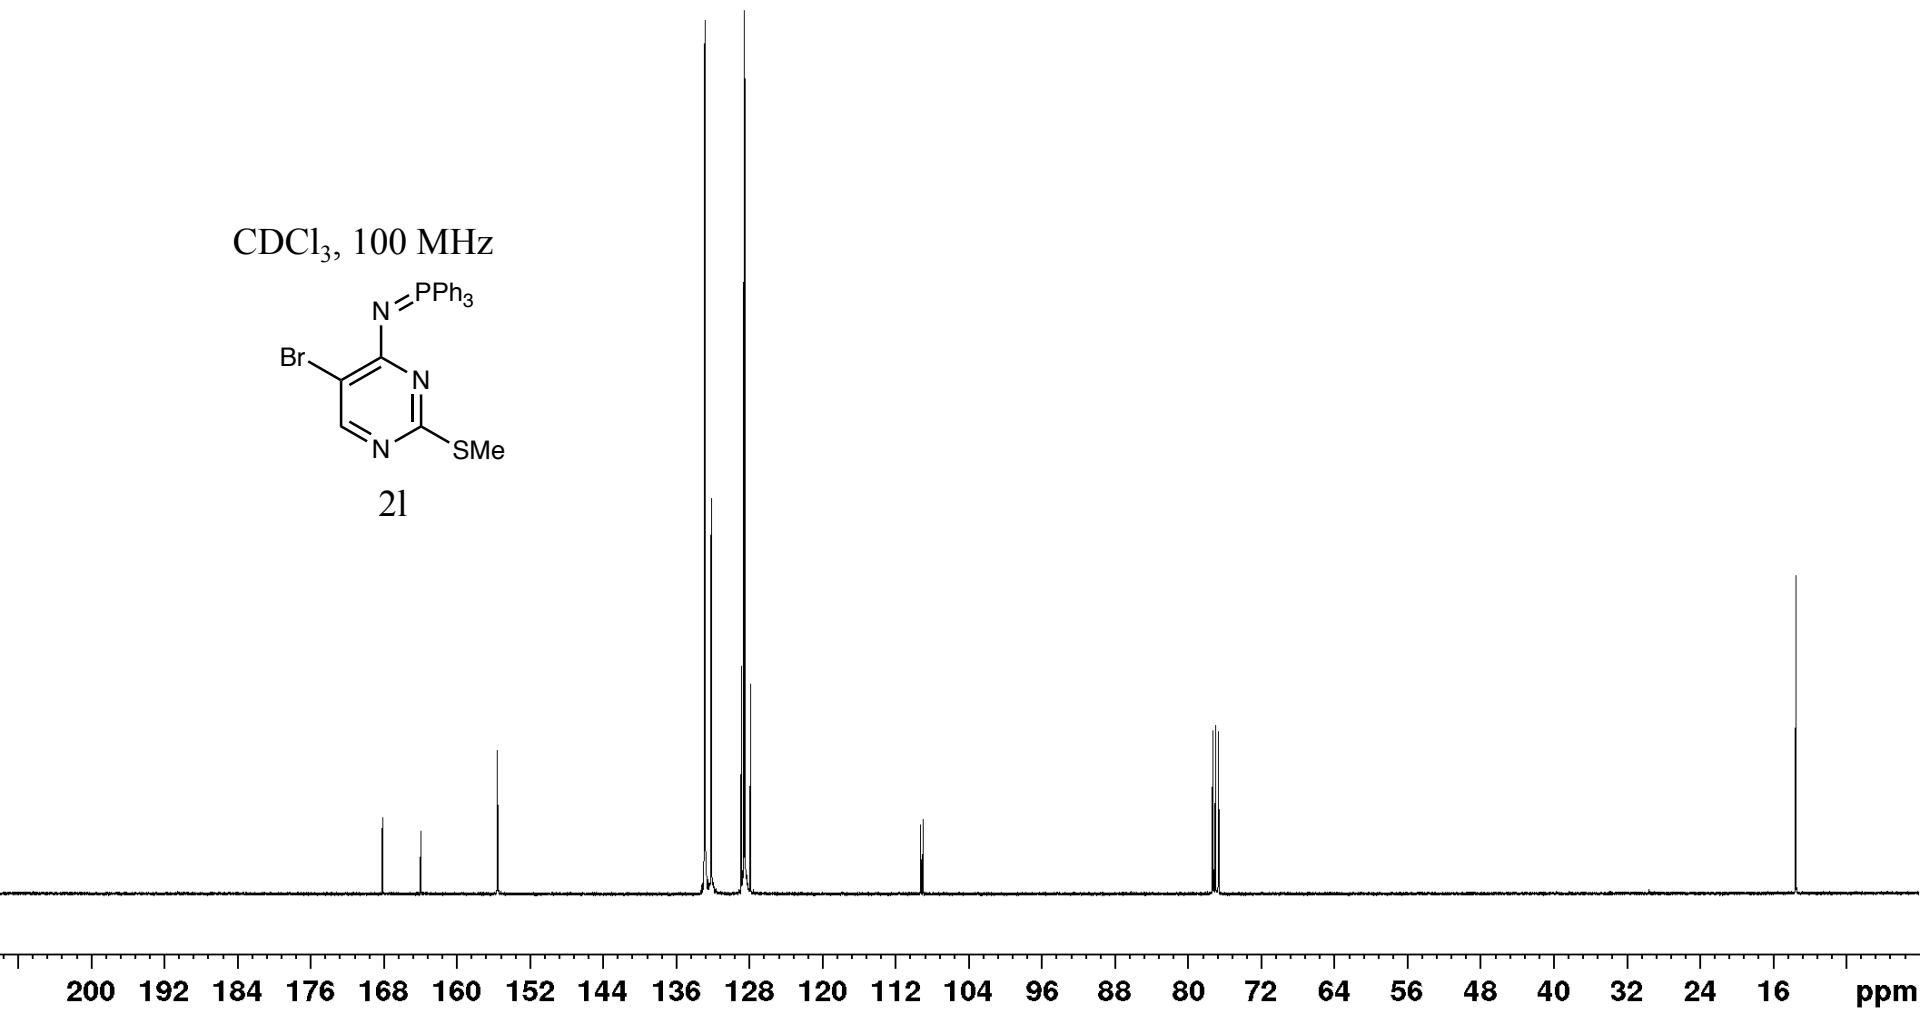

CDCl<sub>3</sub>, 162 MHz

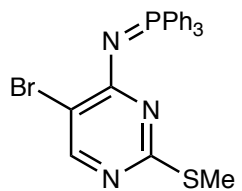

21

16.78

140 130 120 110 100 90 80 70 60 50 40 30 20 10 0 -10 -20 -30 ppm

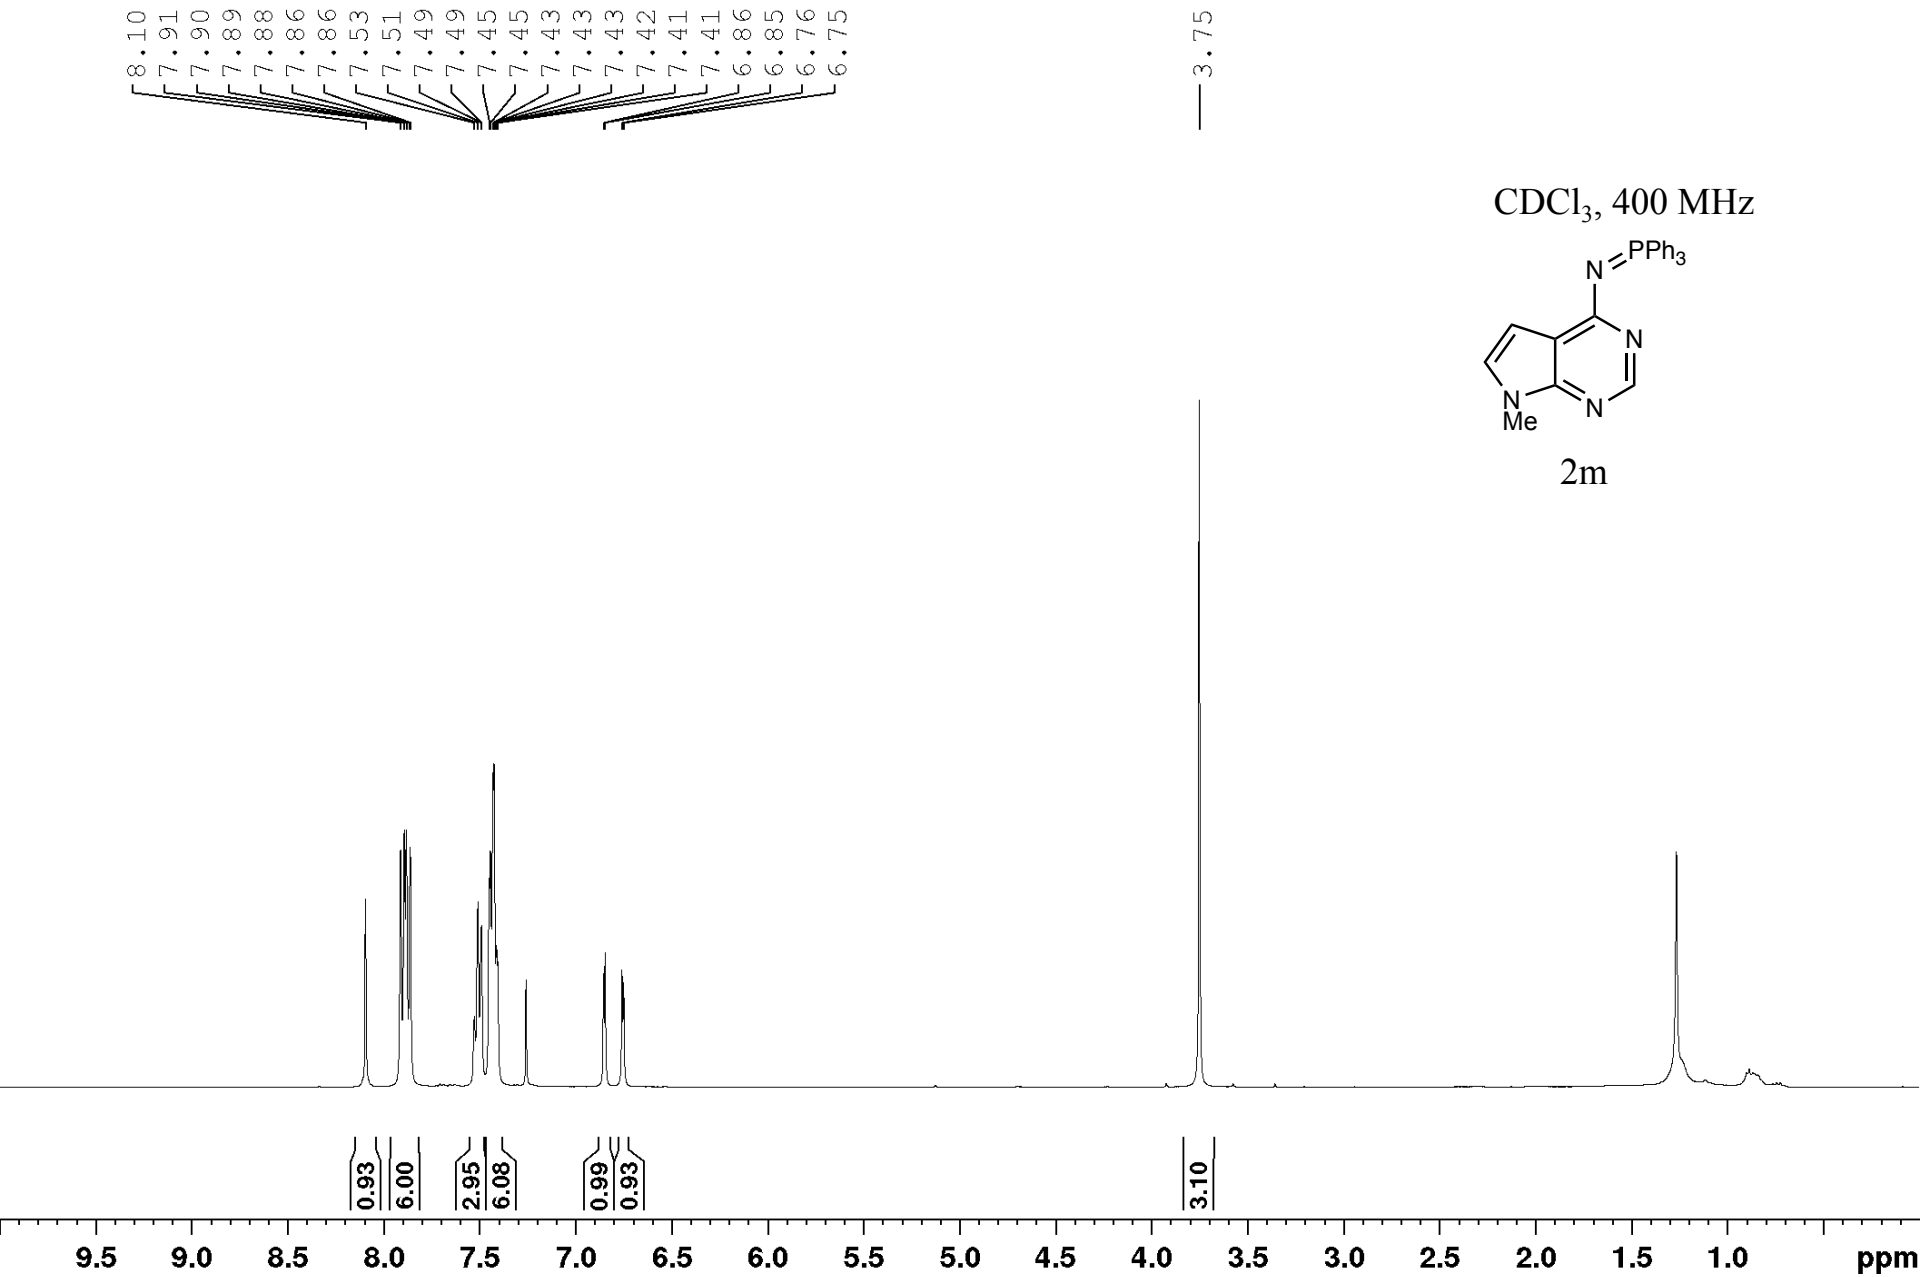

CDCl<sub>3</sub>, 162 MHz

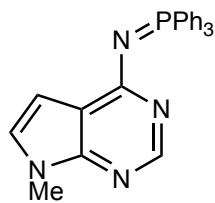

2m

162.49  
162.42  
151.14  
150.65  
150.60  
133.28  
133.19  
131.70  
131.67  
130.14  
129.15  
128.35  
128.23  
123.90  
111.28  
111.03

99.94

77.32  
77.20  
77.00  
76.68

31.08  
29.66

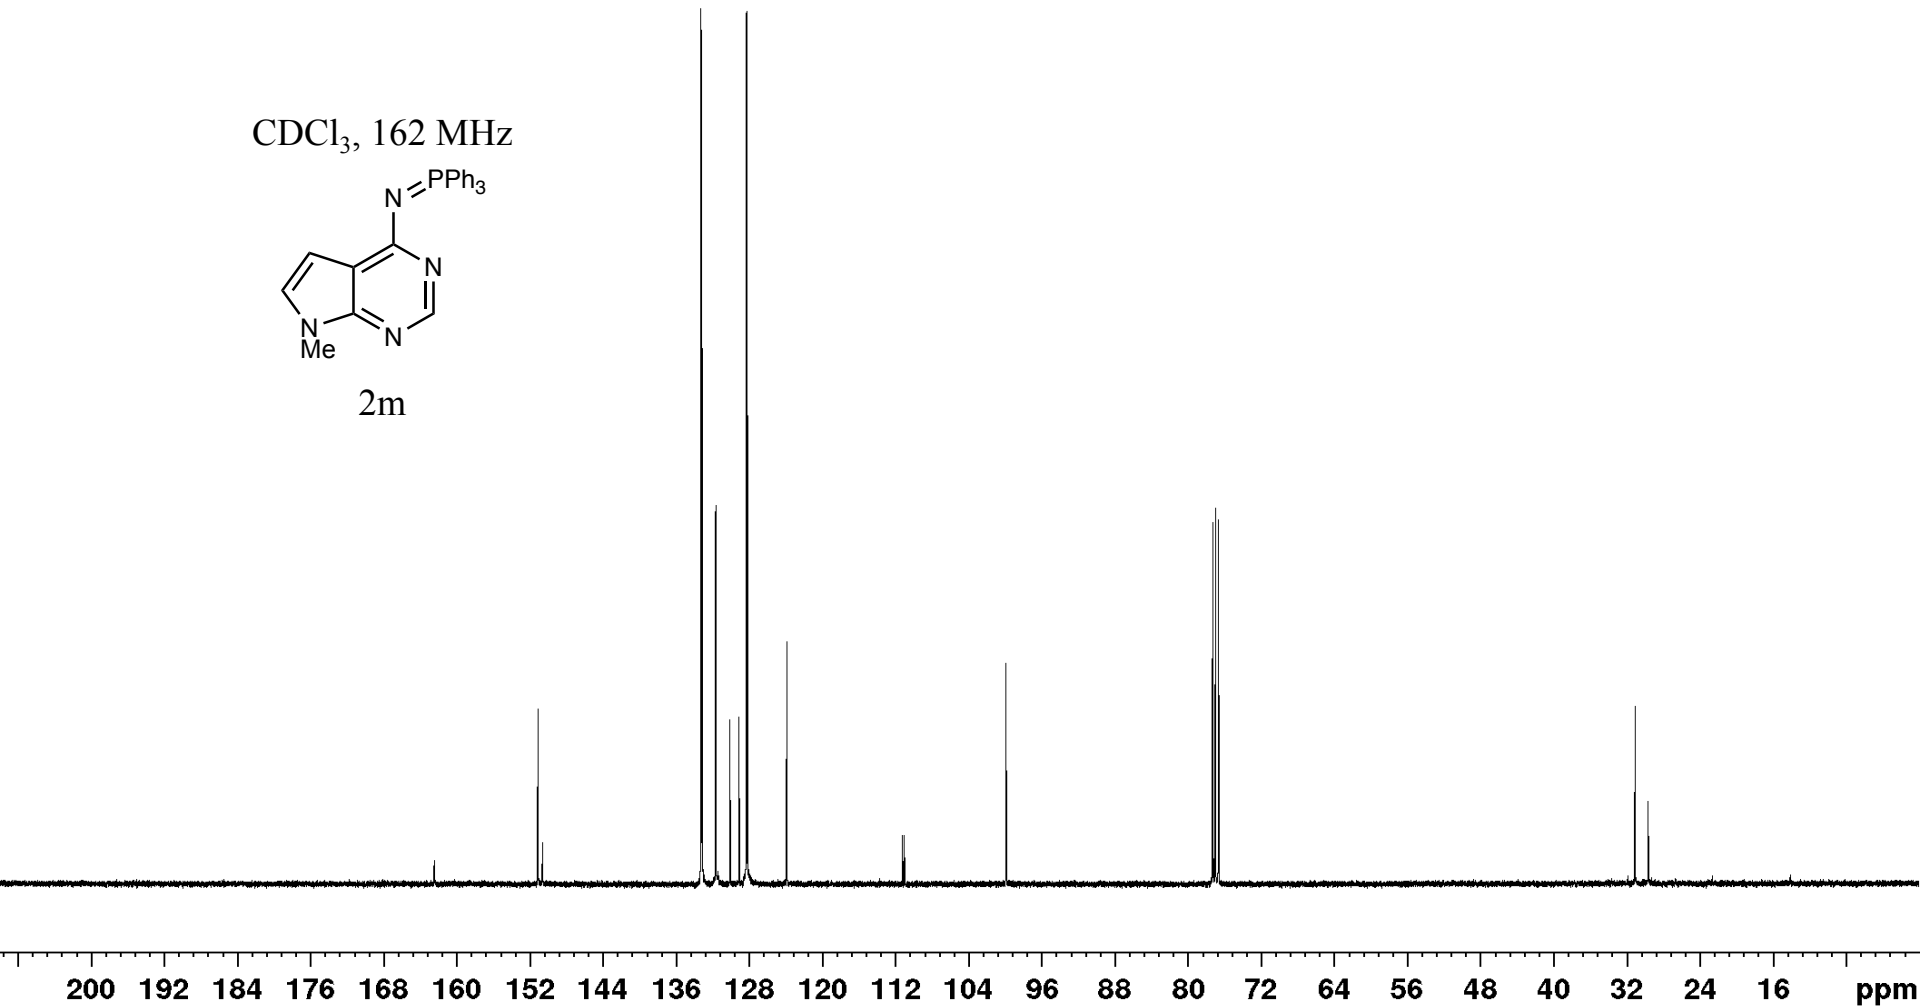

CDCl<sub>3</sub>, 162 MHz

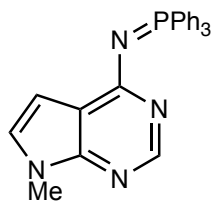

2m

16.13

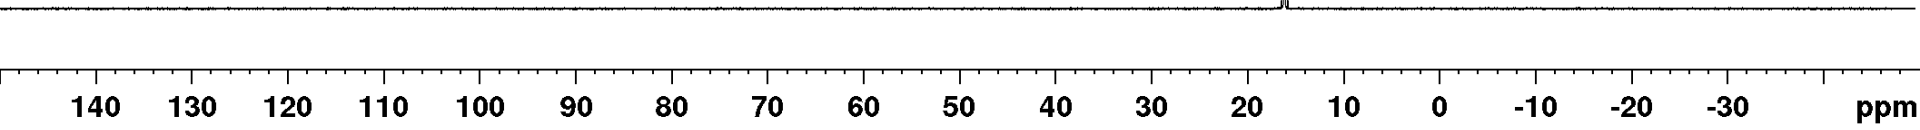

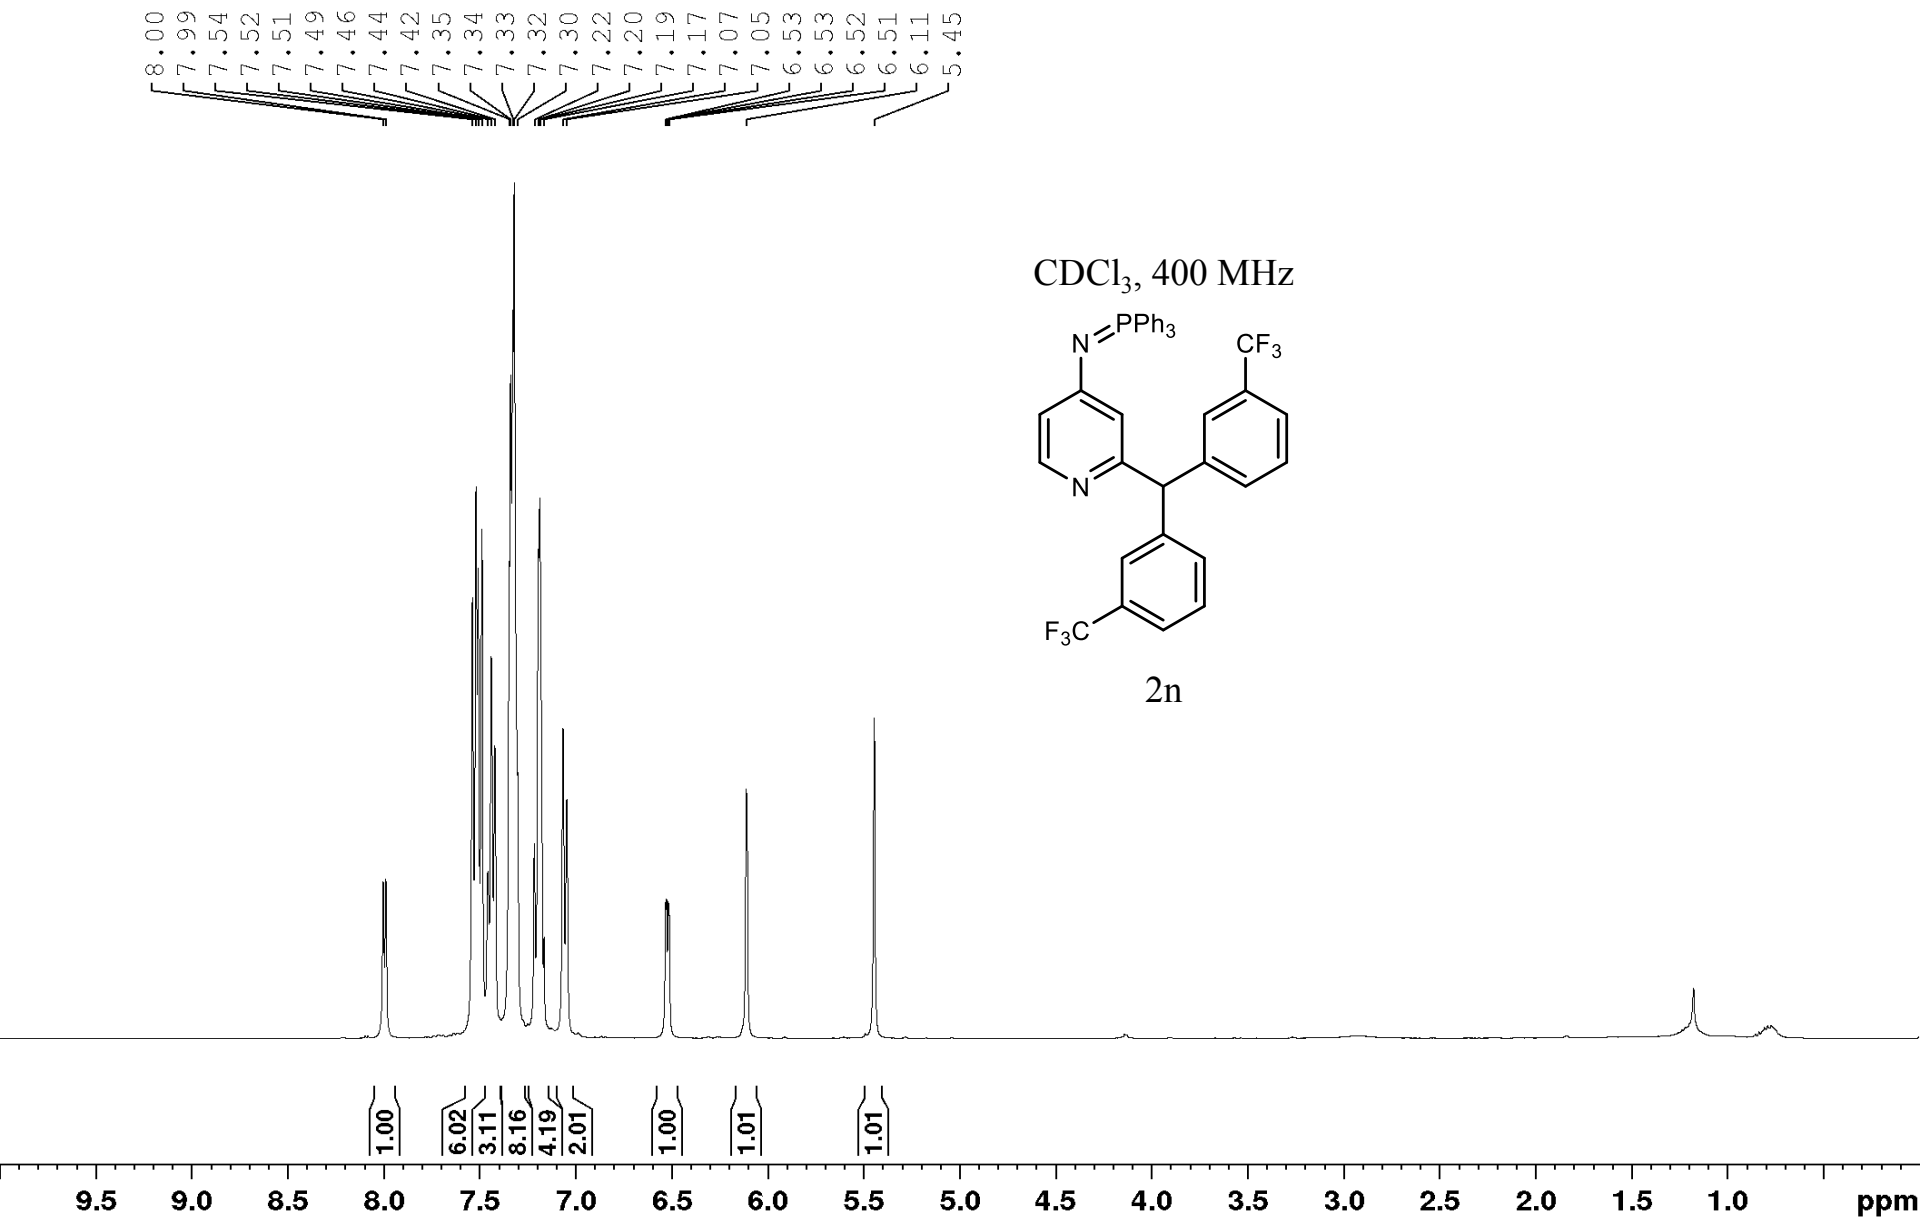

CDCl<sub>3</sub>, 100 MHz

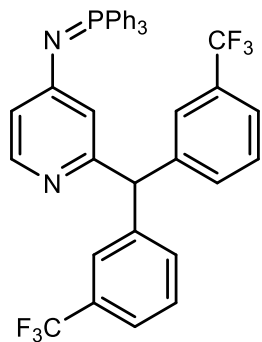

2n

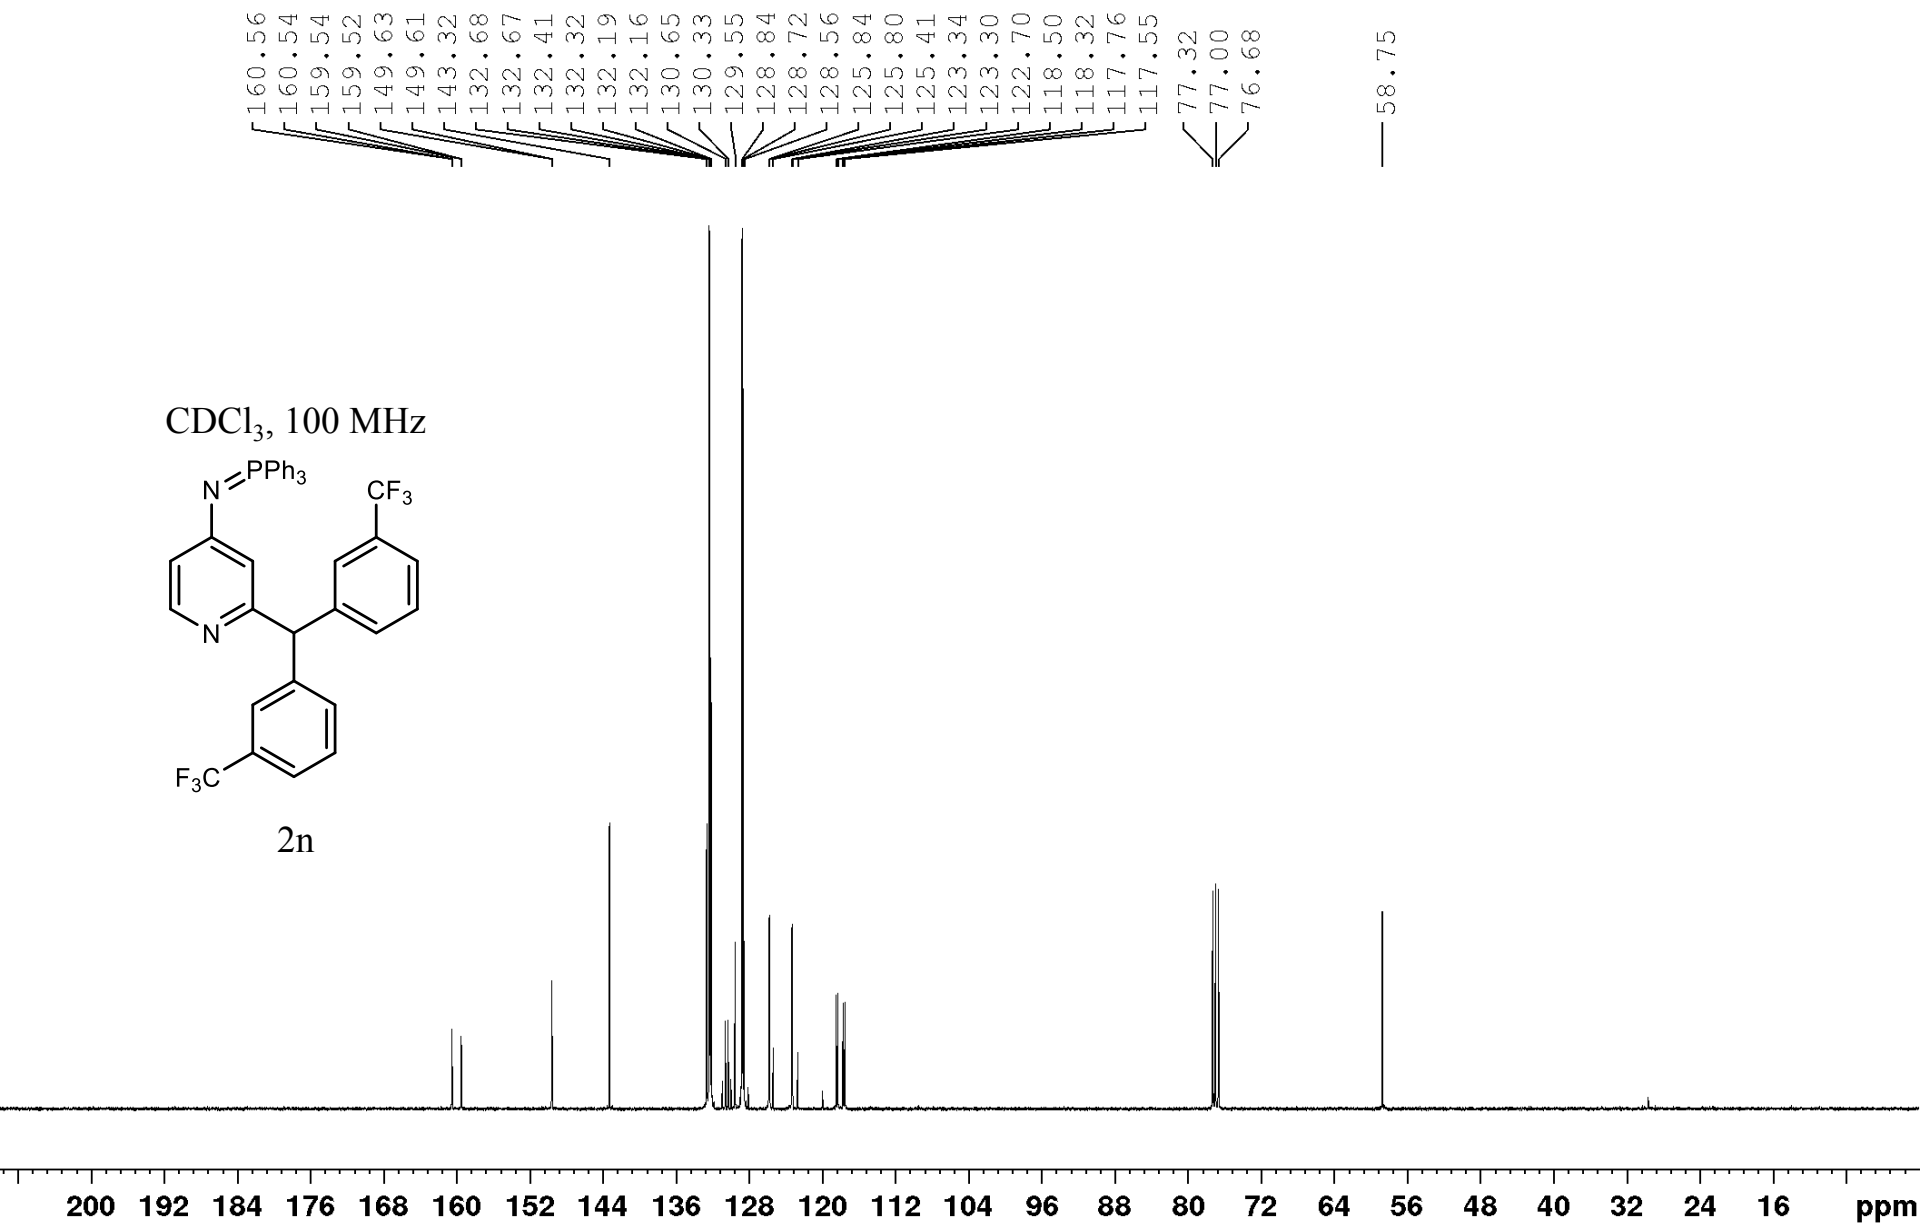

CDCl<sub>3</sub>, 162 MHz

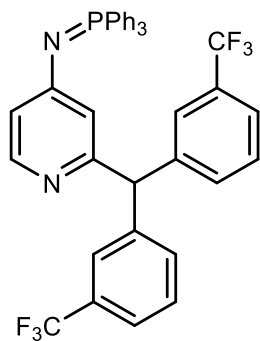

2n

8.97

140 130 120 110 100 90 80 70 60 50 40 30 20 10 0 -10 -20 -30 ppm



CDCl<sub>3</sub>, 365 MHz

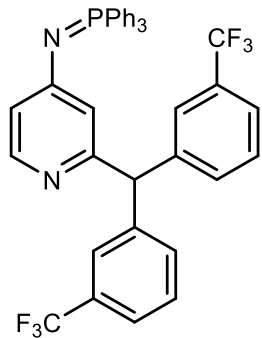

2n

— -62.41

10 0 -10 -20 -30 -40 -50 -60 -70 -80 -90 -100 -110 -120 -130 -140 -150 -160 -170 -180 ppm

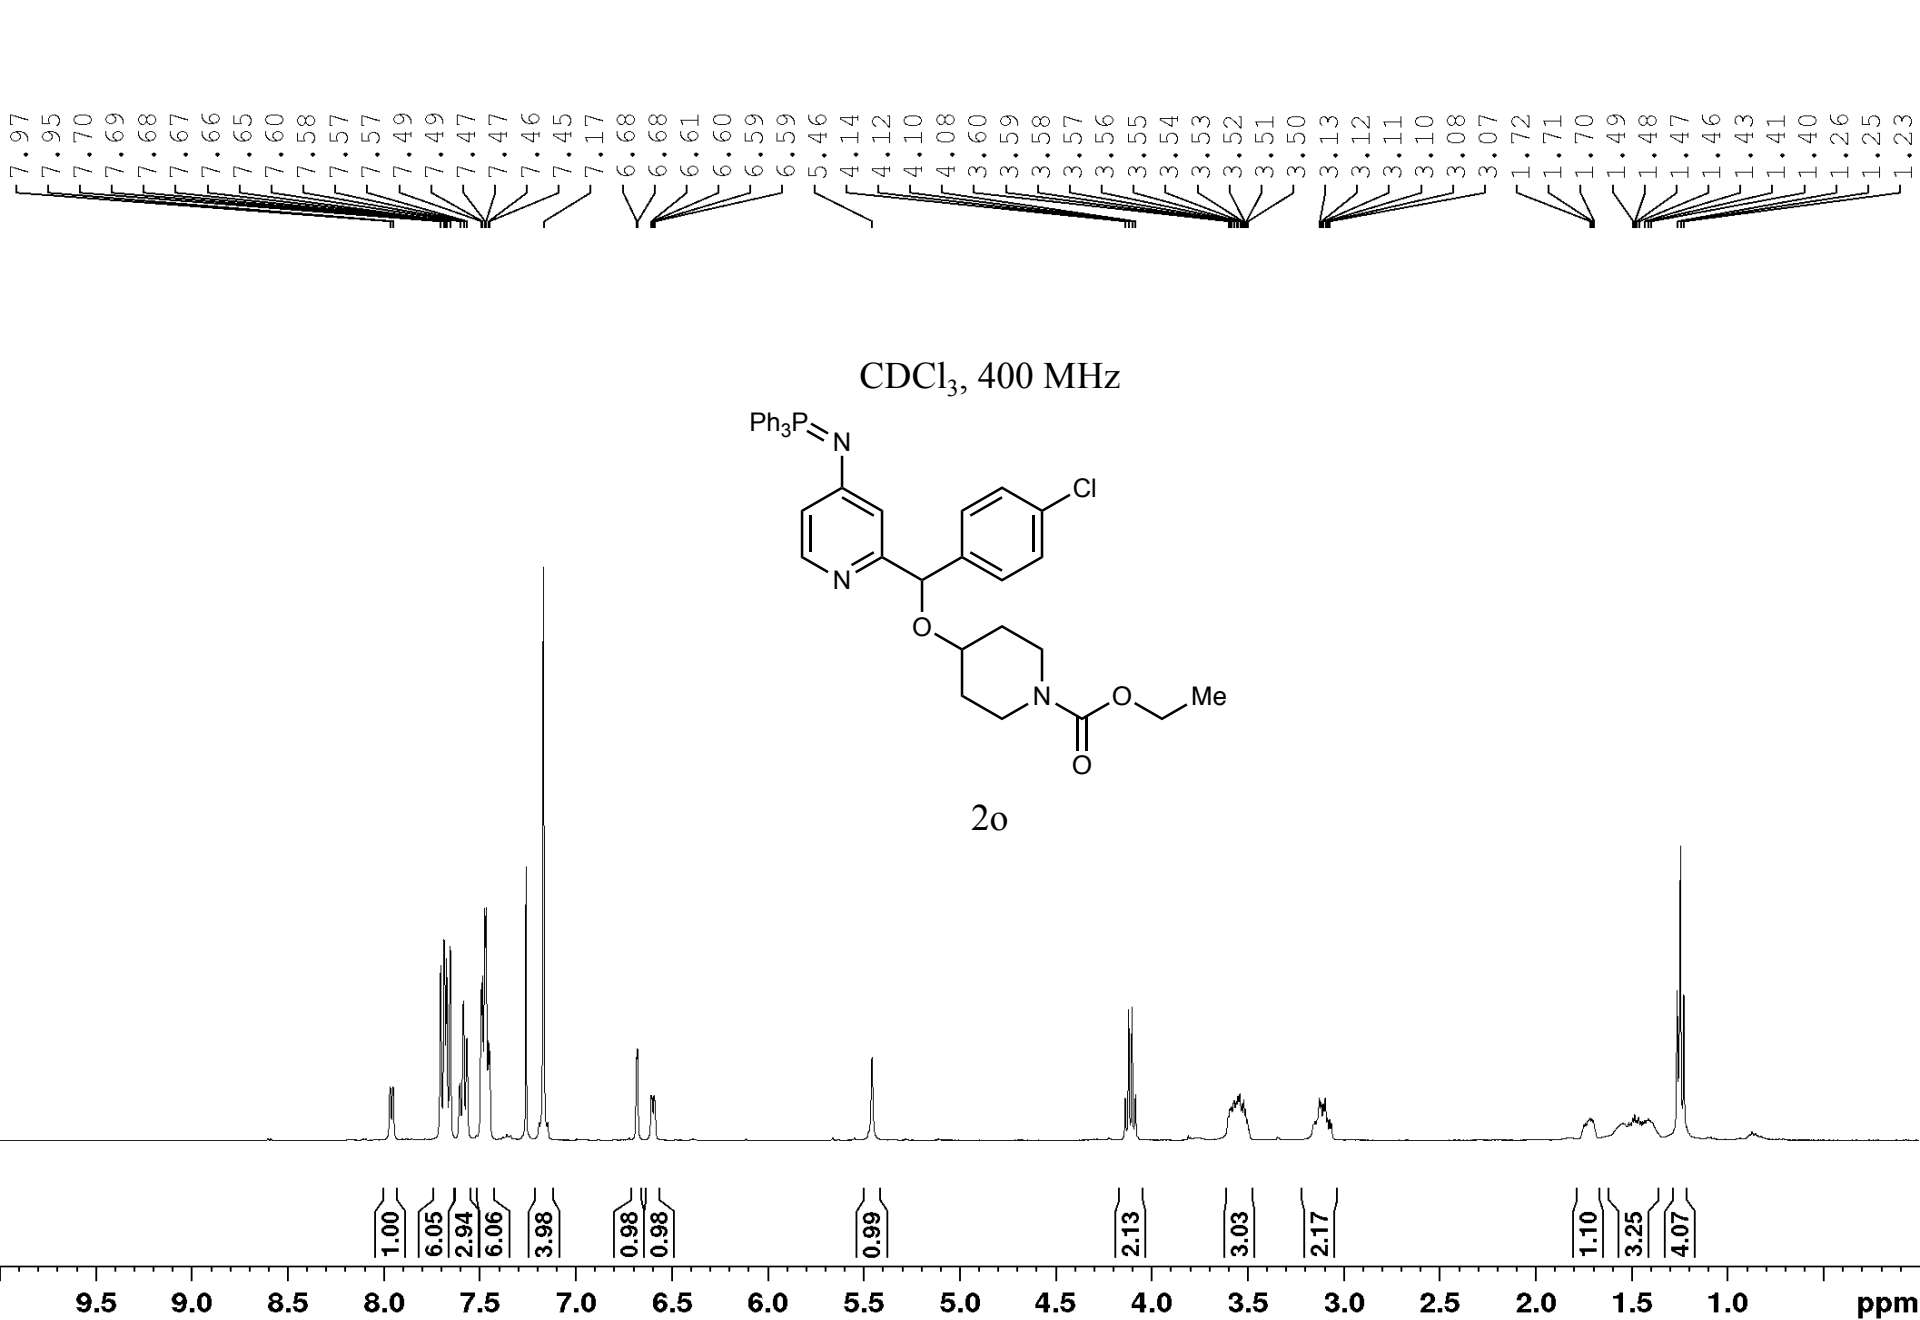

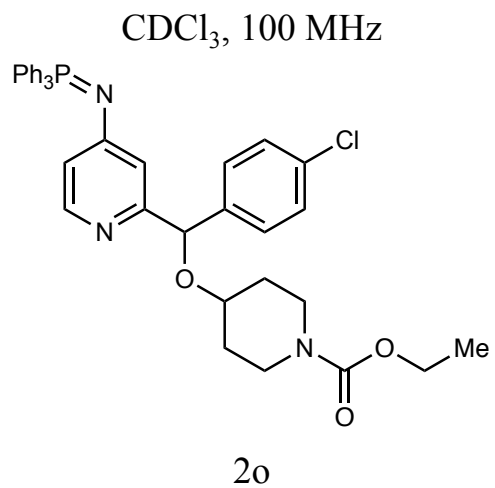

161.11  
159.51  
155.42  
146.62  
140.10  
132.98  
132.51  
132.41  
129.24  
128.99  
128.87  
128.27  
128.07  
118.53  
118.31  
114.63  
114.45

79.76  
77.32  
77.20  
77.00  
76.68  
72.12

— 61.13

40.87  
40.83  
30.89  
30.80  
29.61

— 14.66

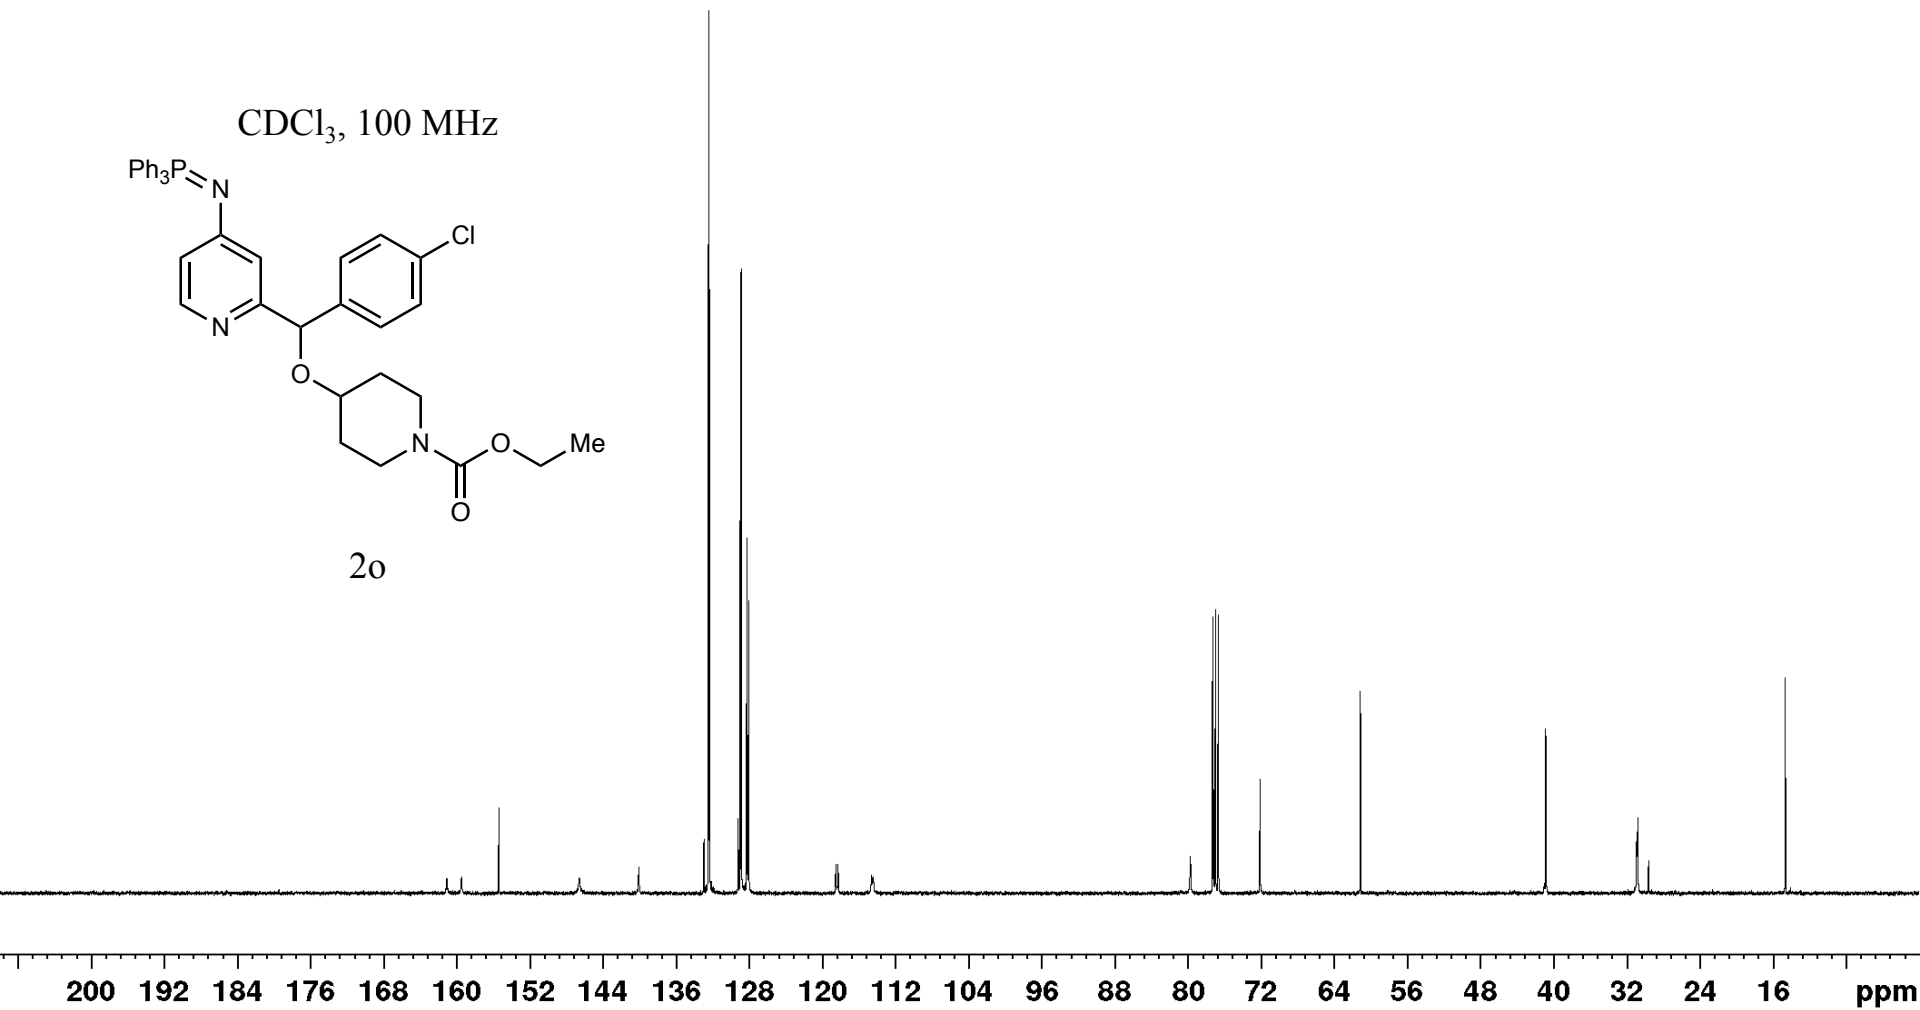

CDCl<sub>3</sub>, 162 MHz

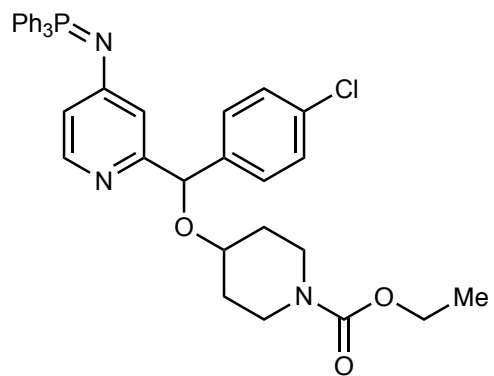

2o

9.60

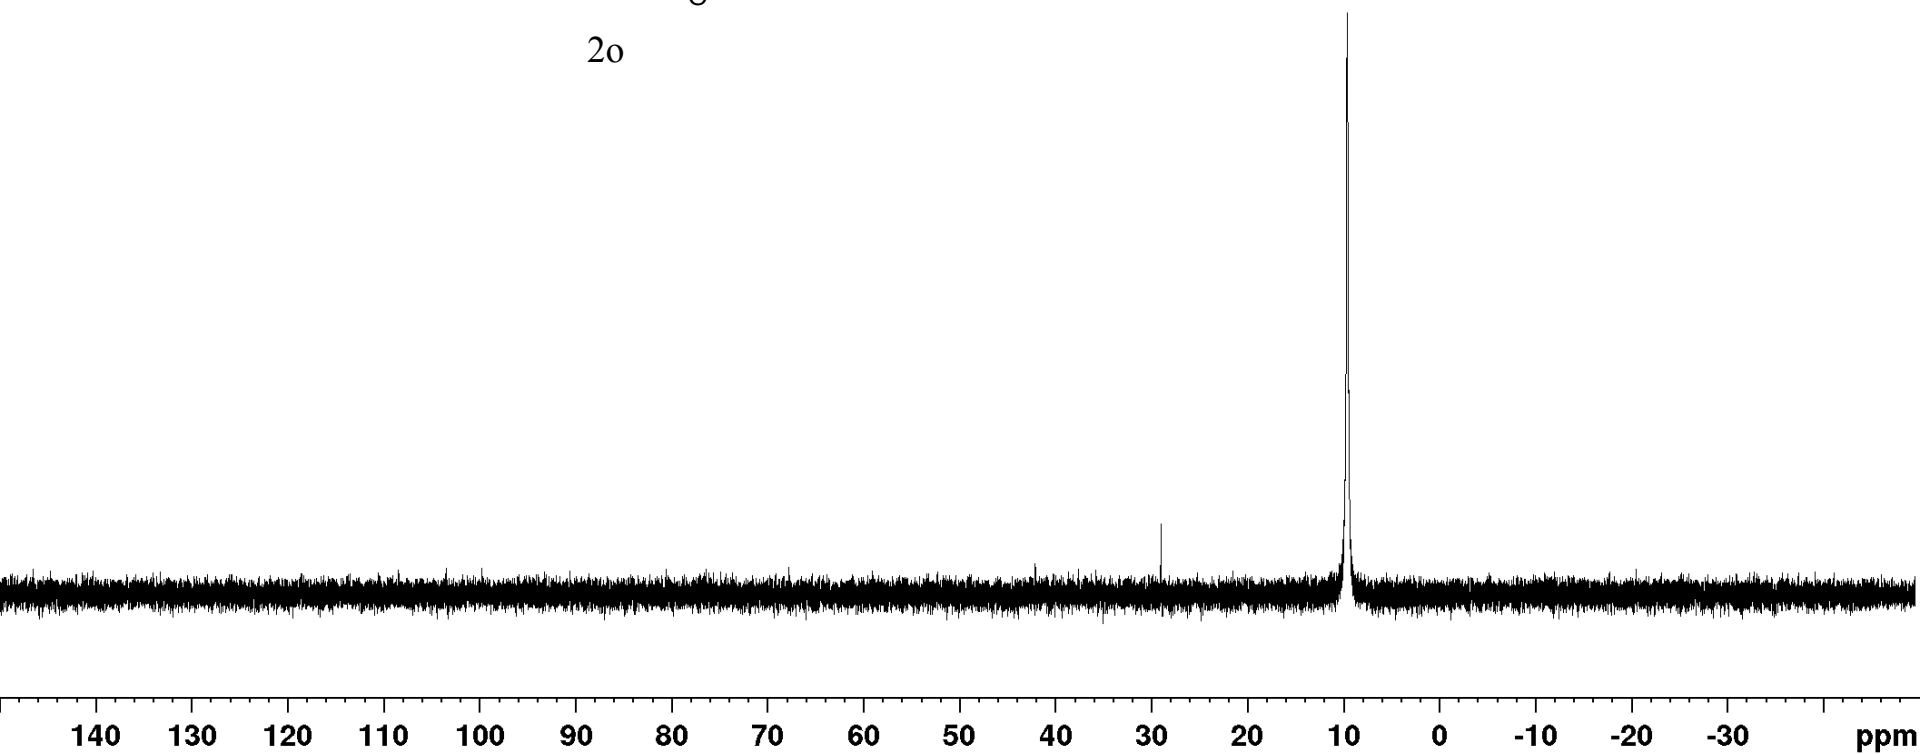

7.91  
7.72  
7.69  
7.67  
7.64  
7.52  
7.50  
7.48  
7.43  
7.42  
7.41  
7.40  
7.39  
7.38  
7.26  
6.47  
6.46  
6.44  
6.43

3.86  
3.85  
3.69  
3.67  
3.52  
3.51  
3.50  
3.49  
3.32  
3.30  
3.27  
3.25  
3.23  
3.21  
2.88  
2.85  
2.83  
1.73  
1.72  
1.68  
1.66  
1.65  
1.63  
1.52  
1.50  
1.47  
1.41

CDCl<sub>3</sub>, 400 MHz

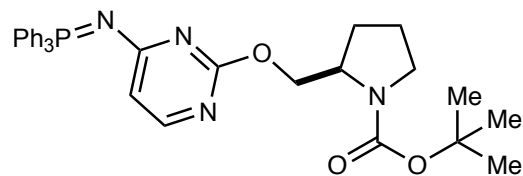

2p

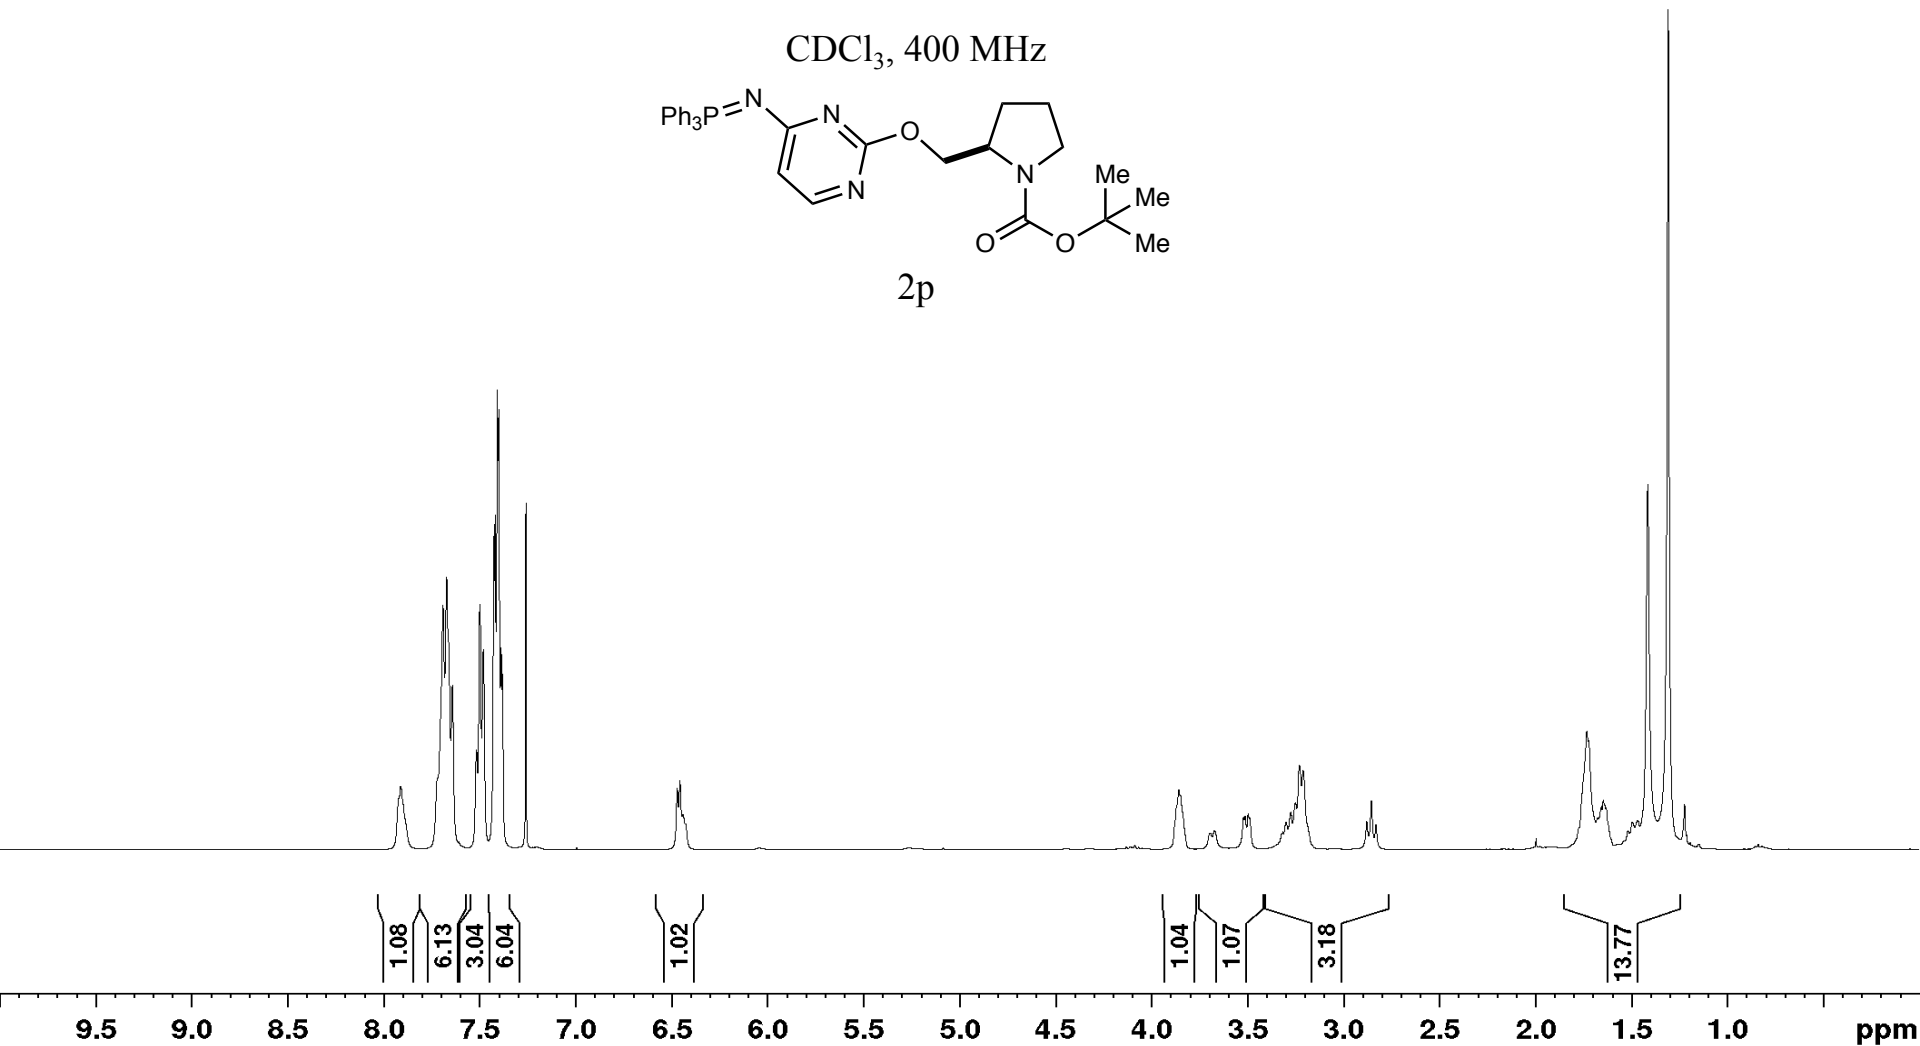

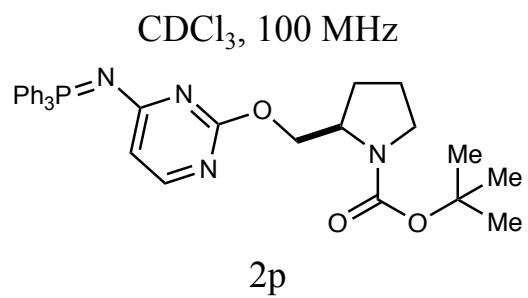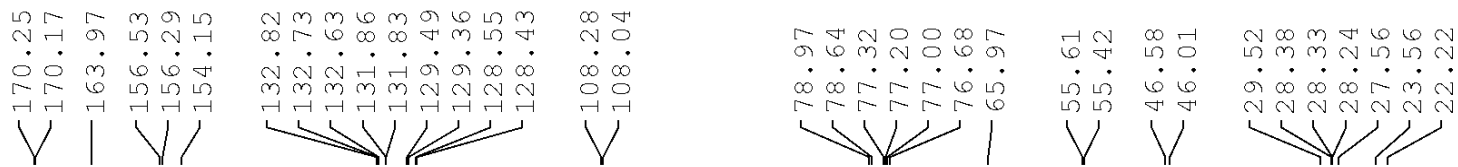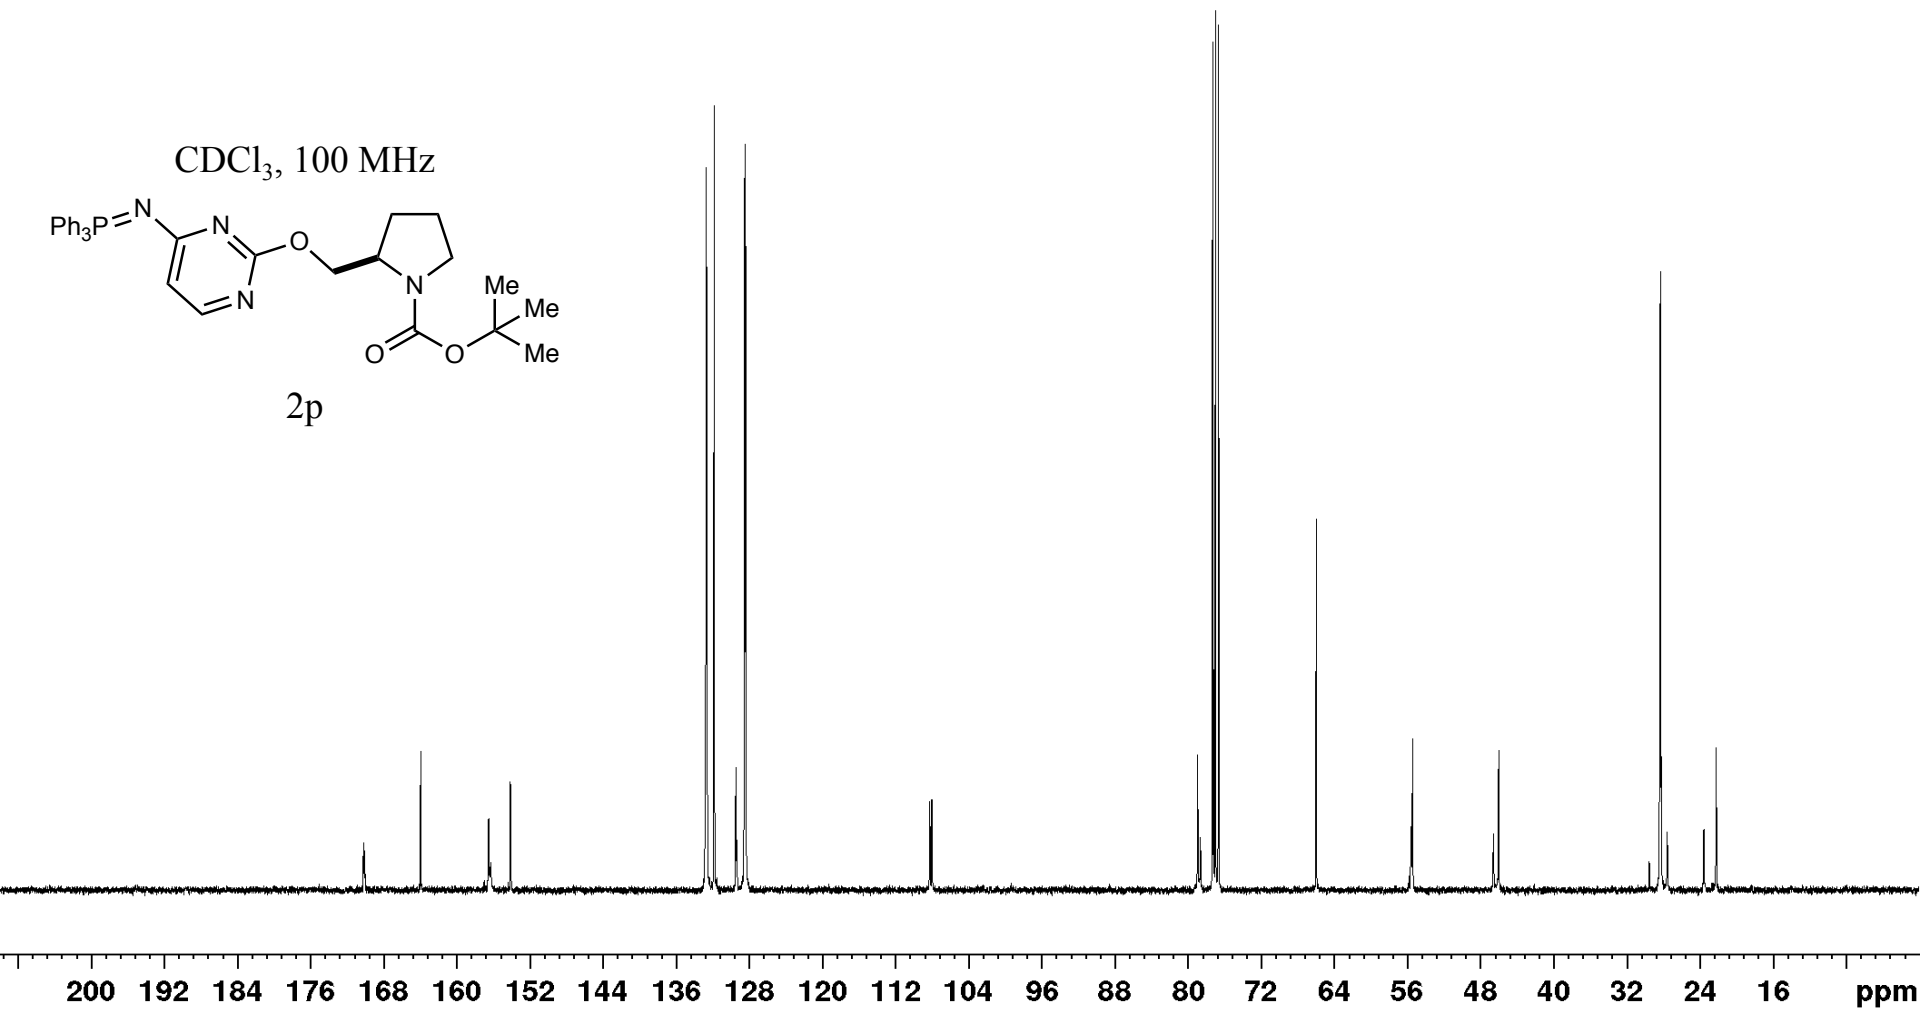

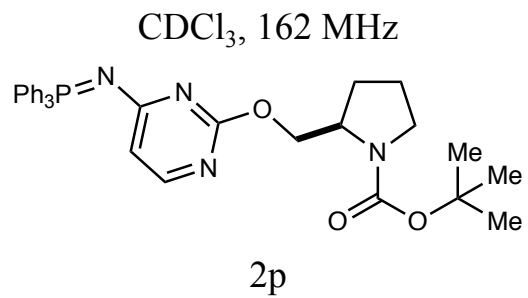

—17.78

140 130 120 110 100 90 80 70 60 50 40 30 20 10 0 -10 -20 -30 ppm

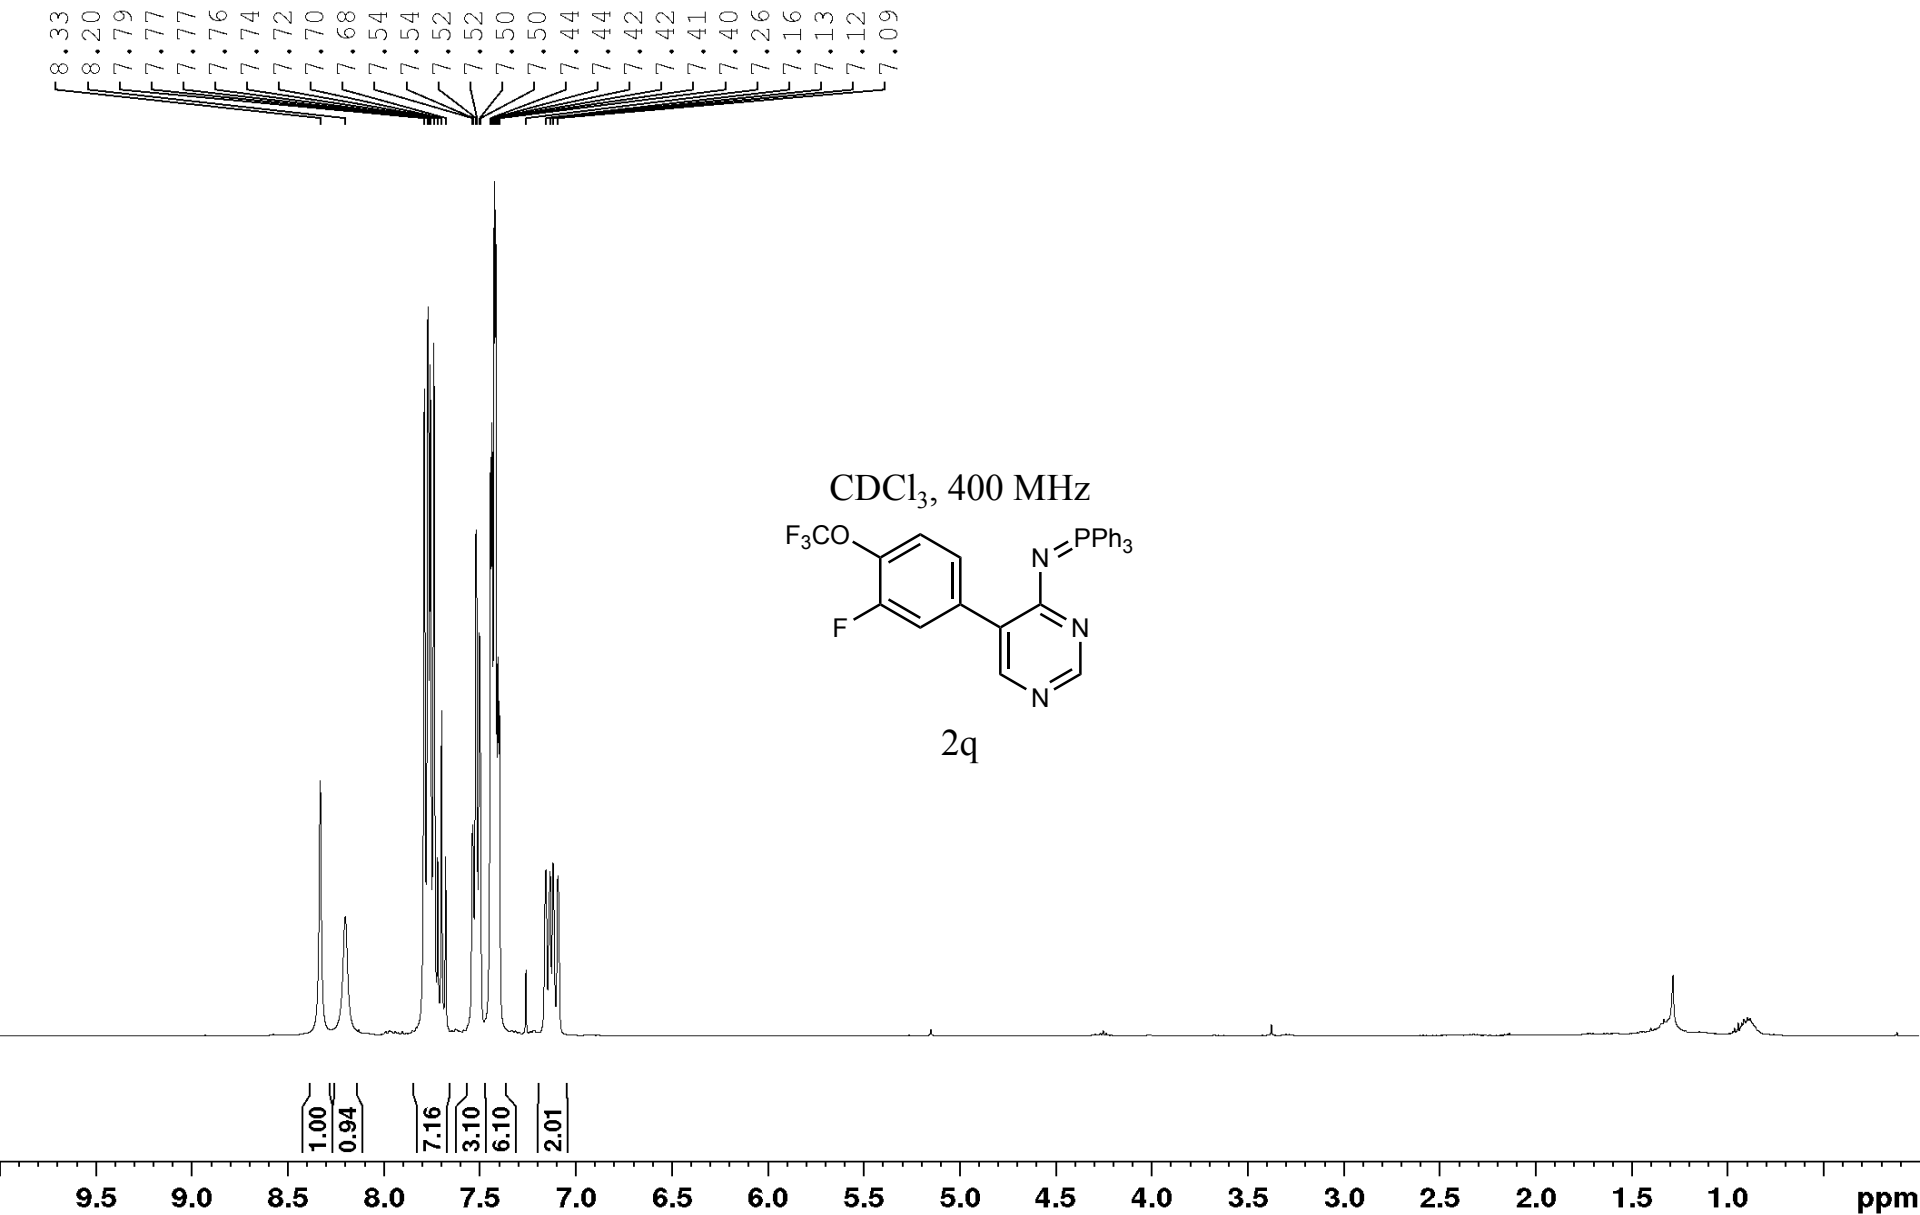



165.58  
165.52  
161.52  
159.03  
157.50  
154.43  
148.74  
148.72  
148.63  
148.61  
133.36  
133.26  
133.09  
132.99  
132.83  
132.78  
131.93  
131.90  
129.32  
128.67  
128.55  
128.43  
128.31  
128.00  
124.52  
124.37  
124.27  
121.70  
120.57  
120.34  
119.14  
116.58  
115.97  
115.94  
109.00  
108.73  
77.31  
77.20  
77.00  
76.68

CDCl<sub>3</sub>, 100 MHz

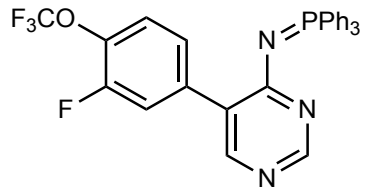

2q

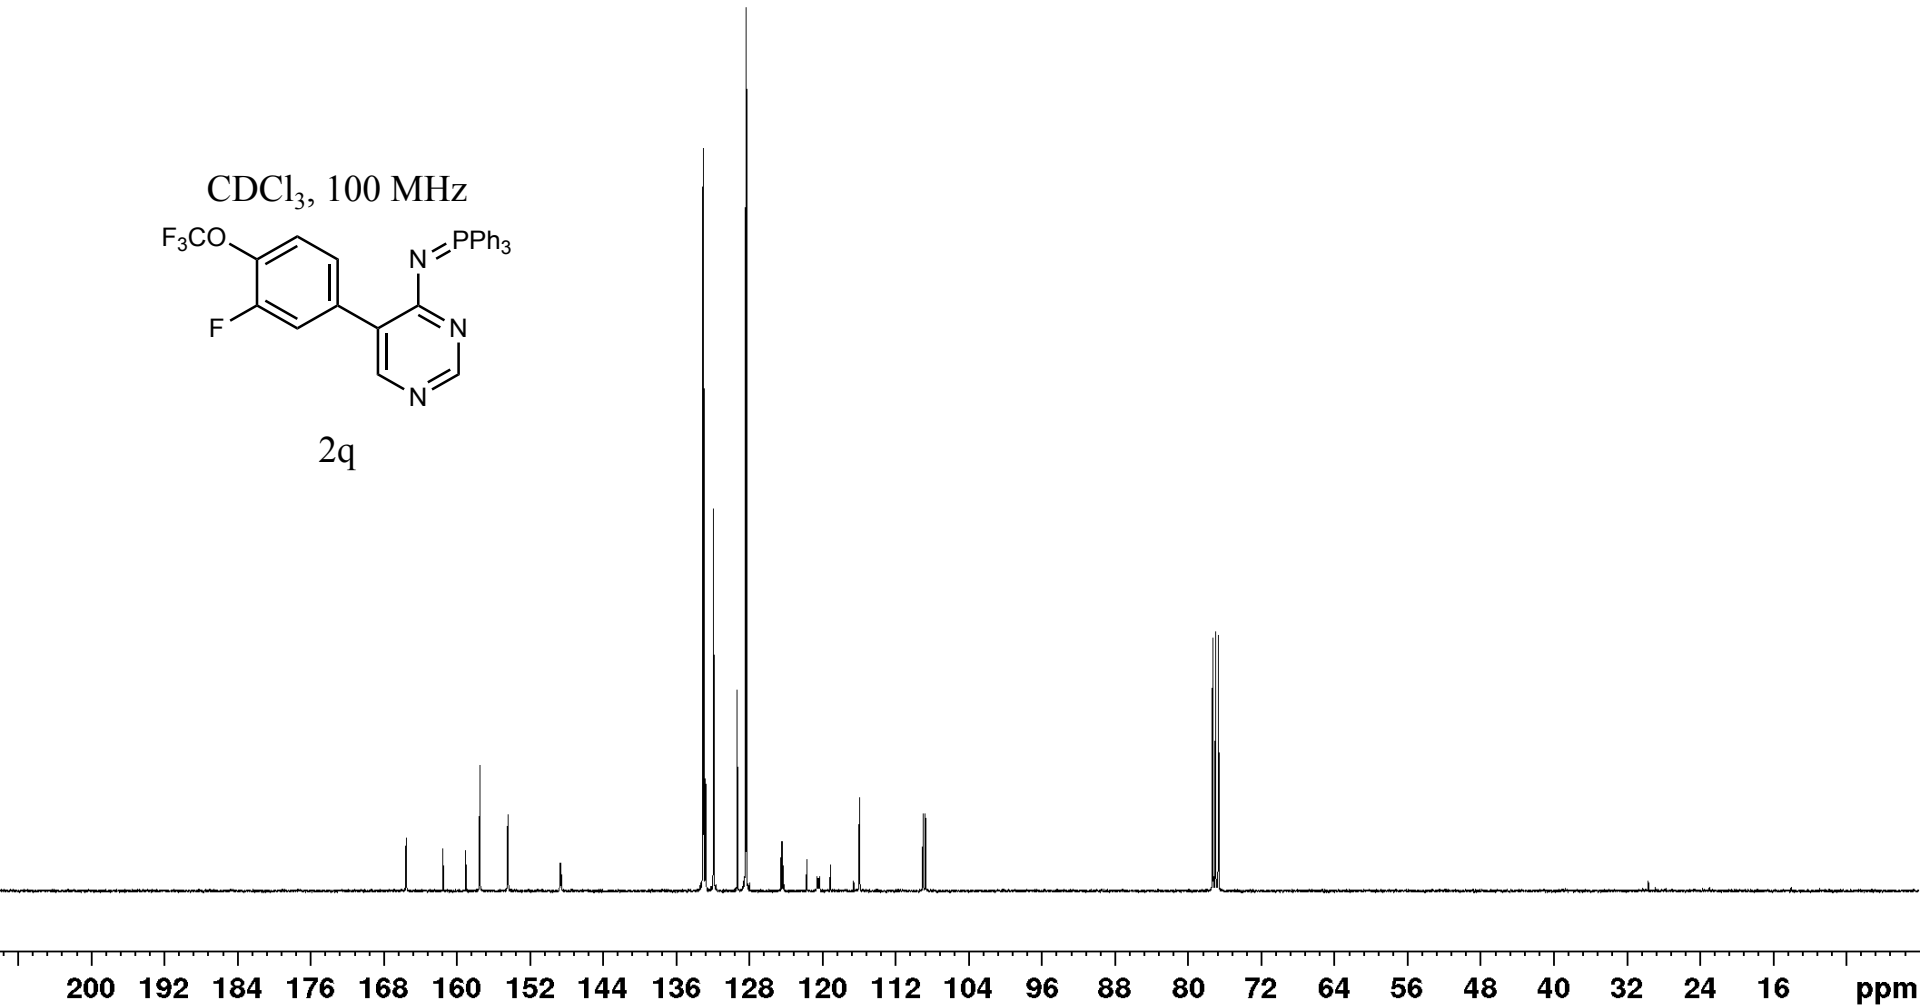

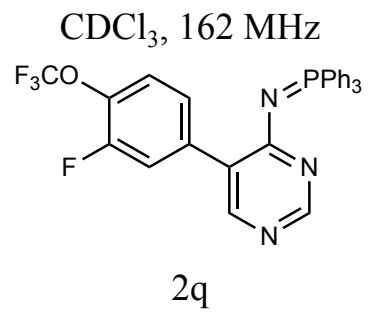

—15.32

140 130 120 110 100 90 80 70 60 50 40 30 20 10 0 -10 -20 -30 ppm

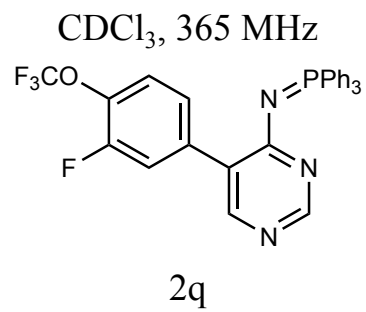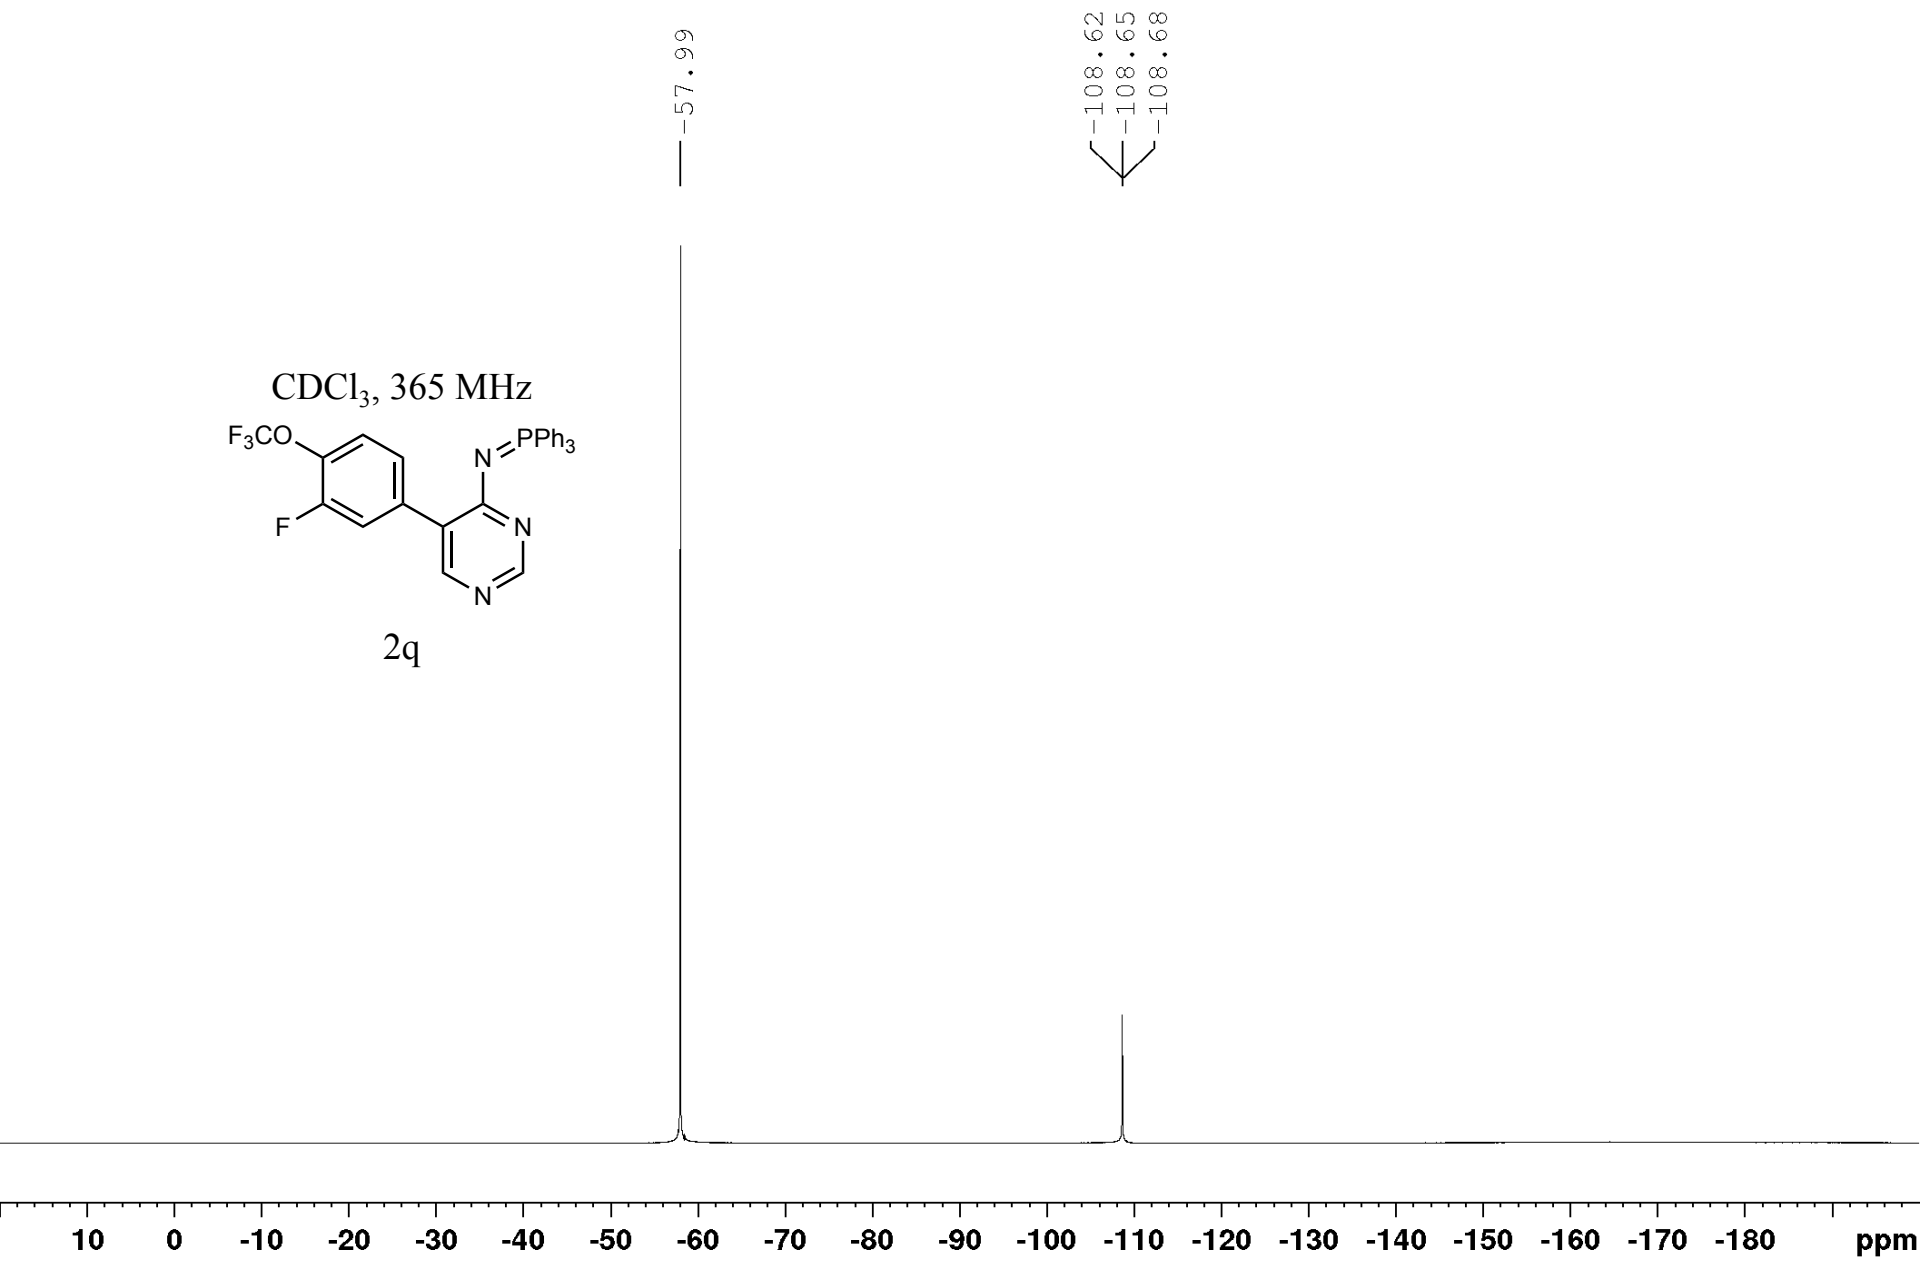

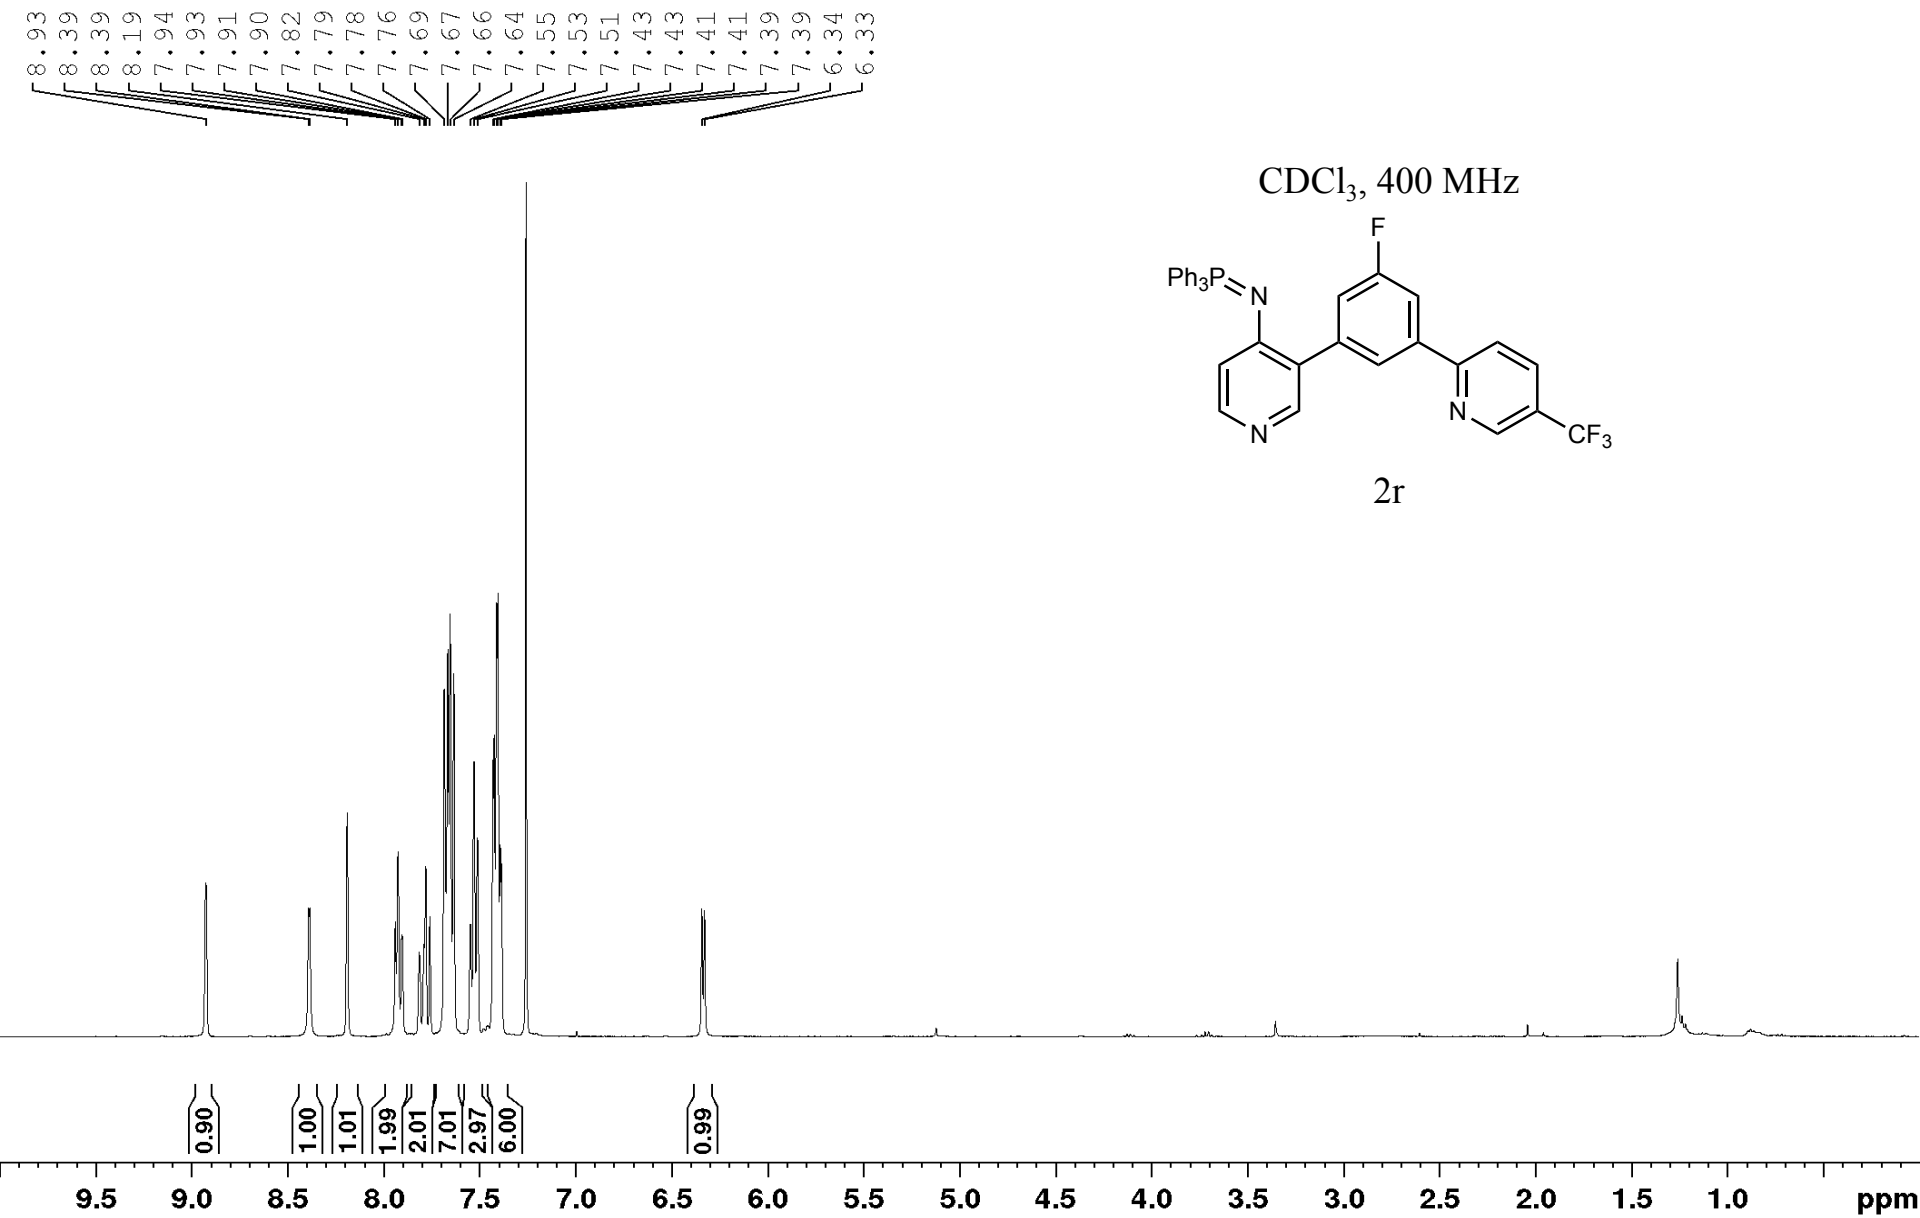

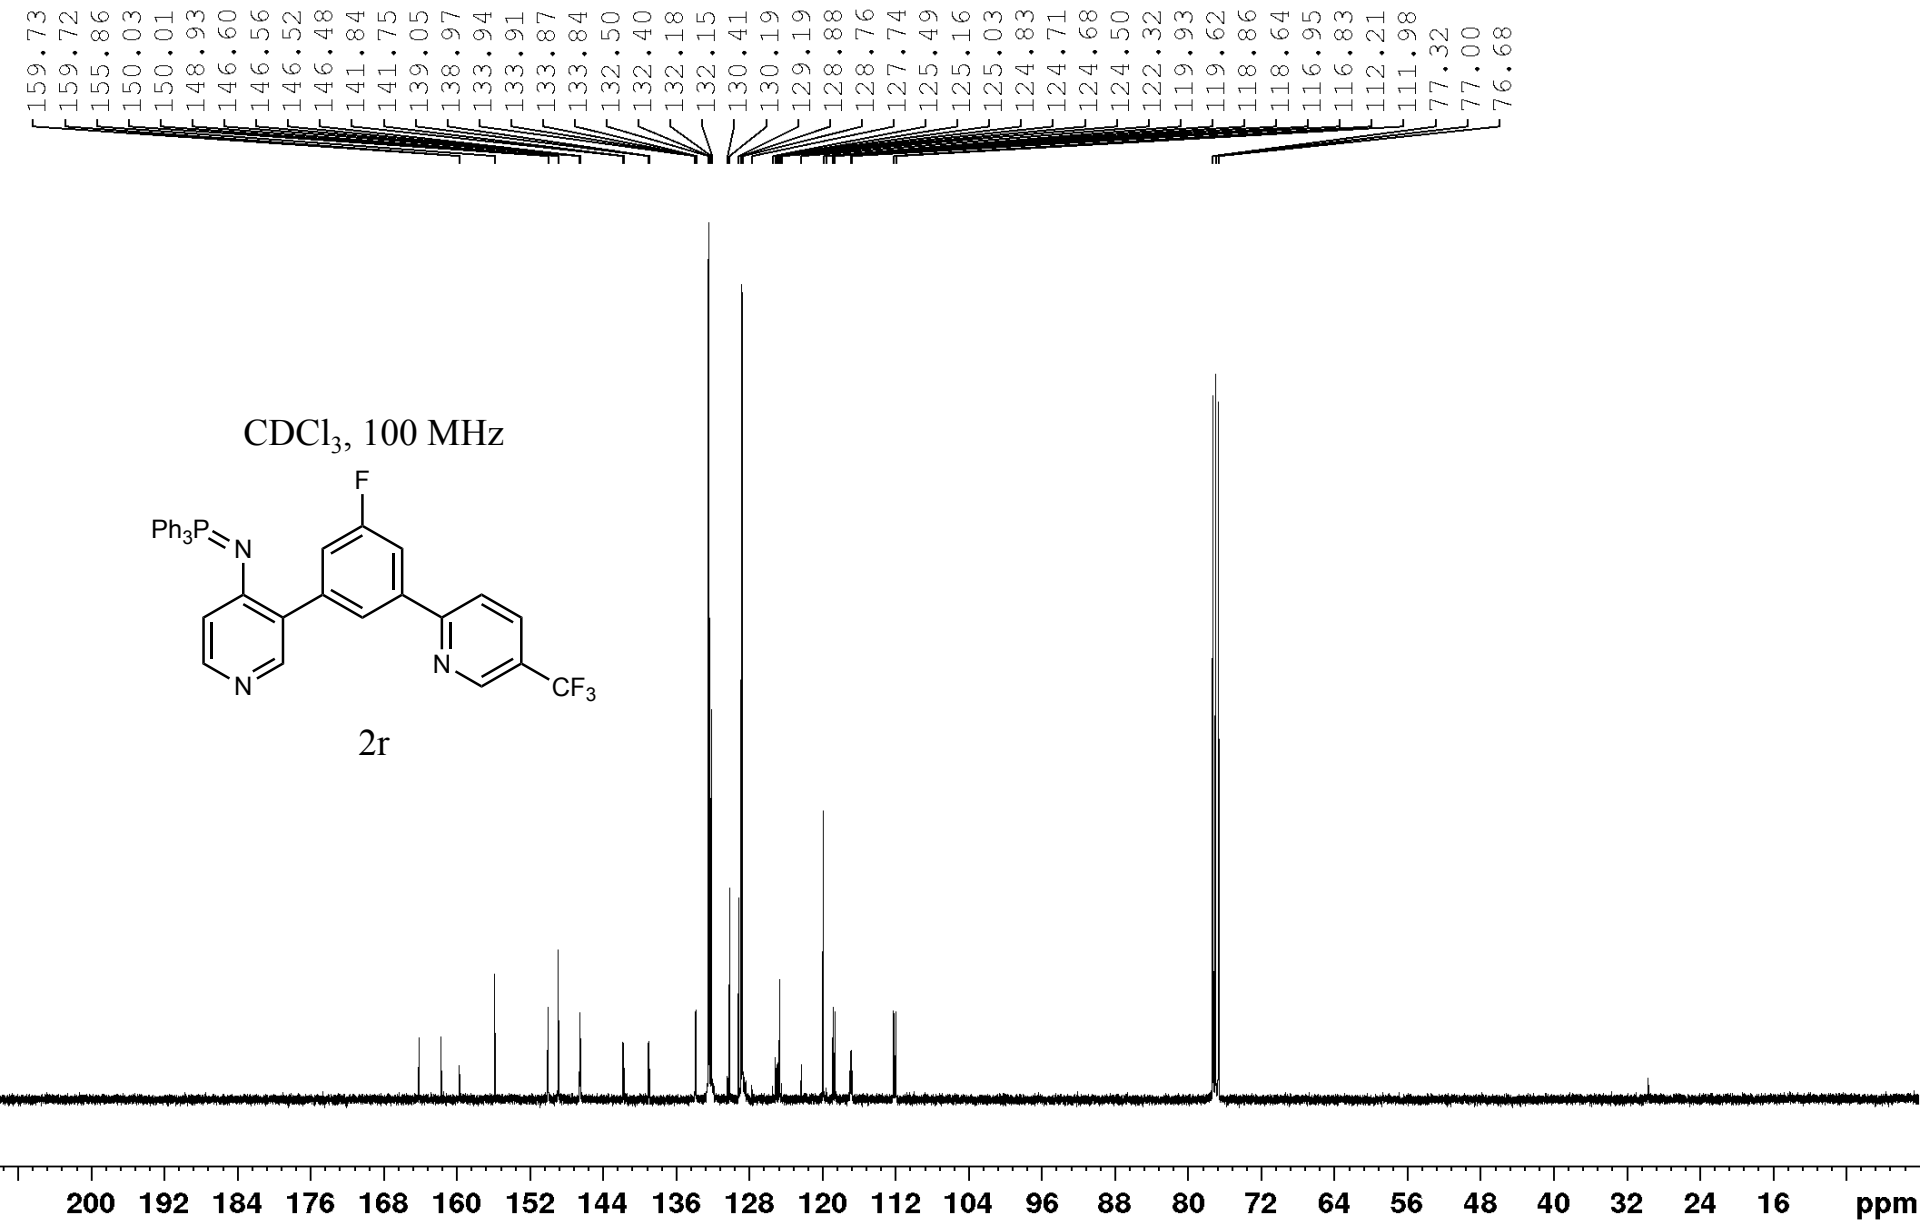

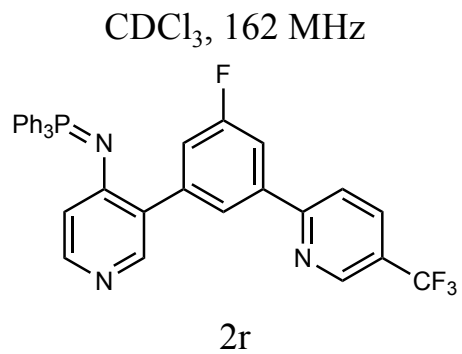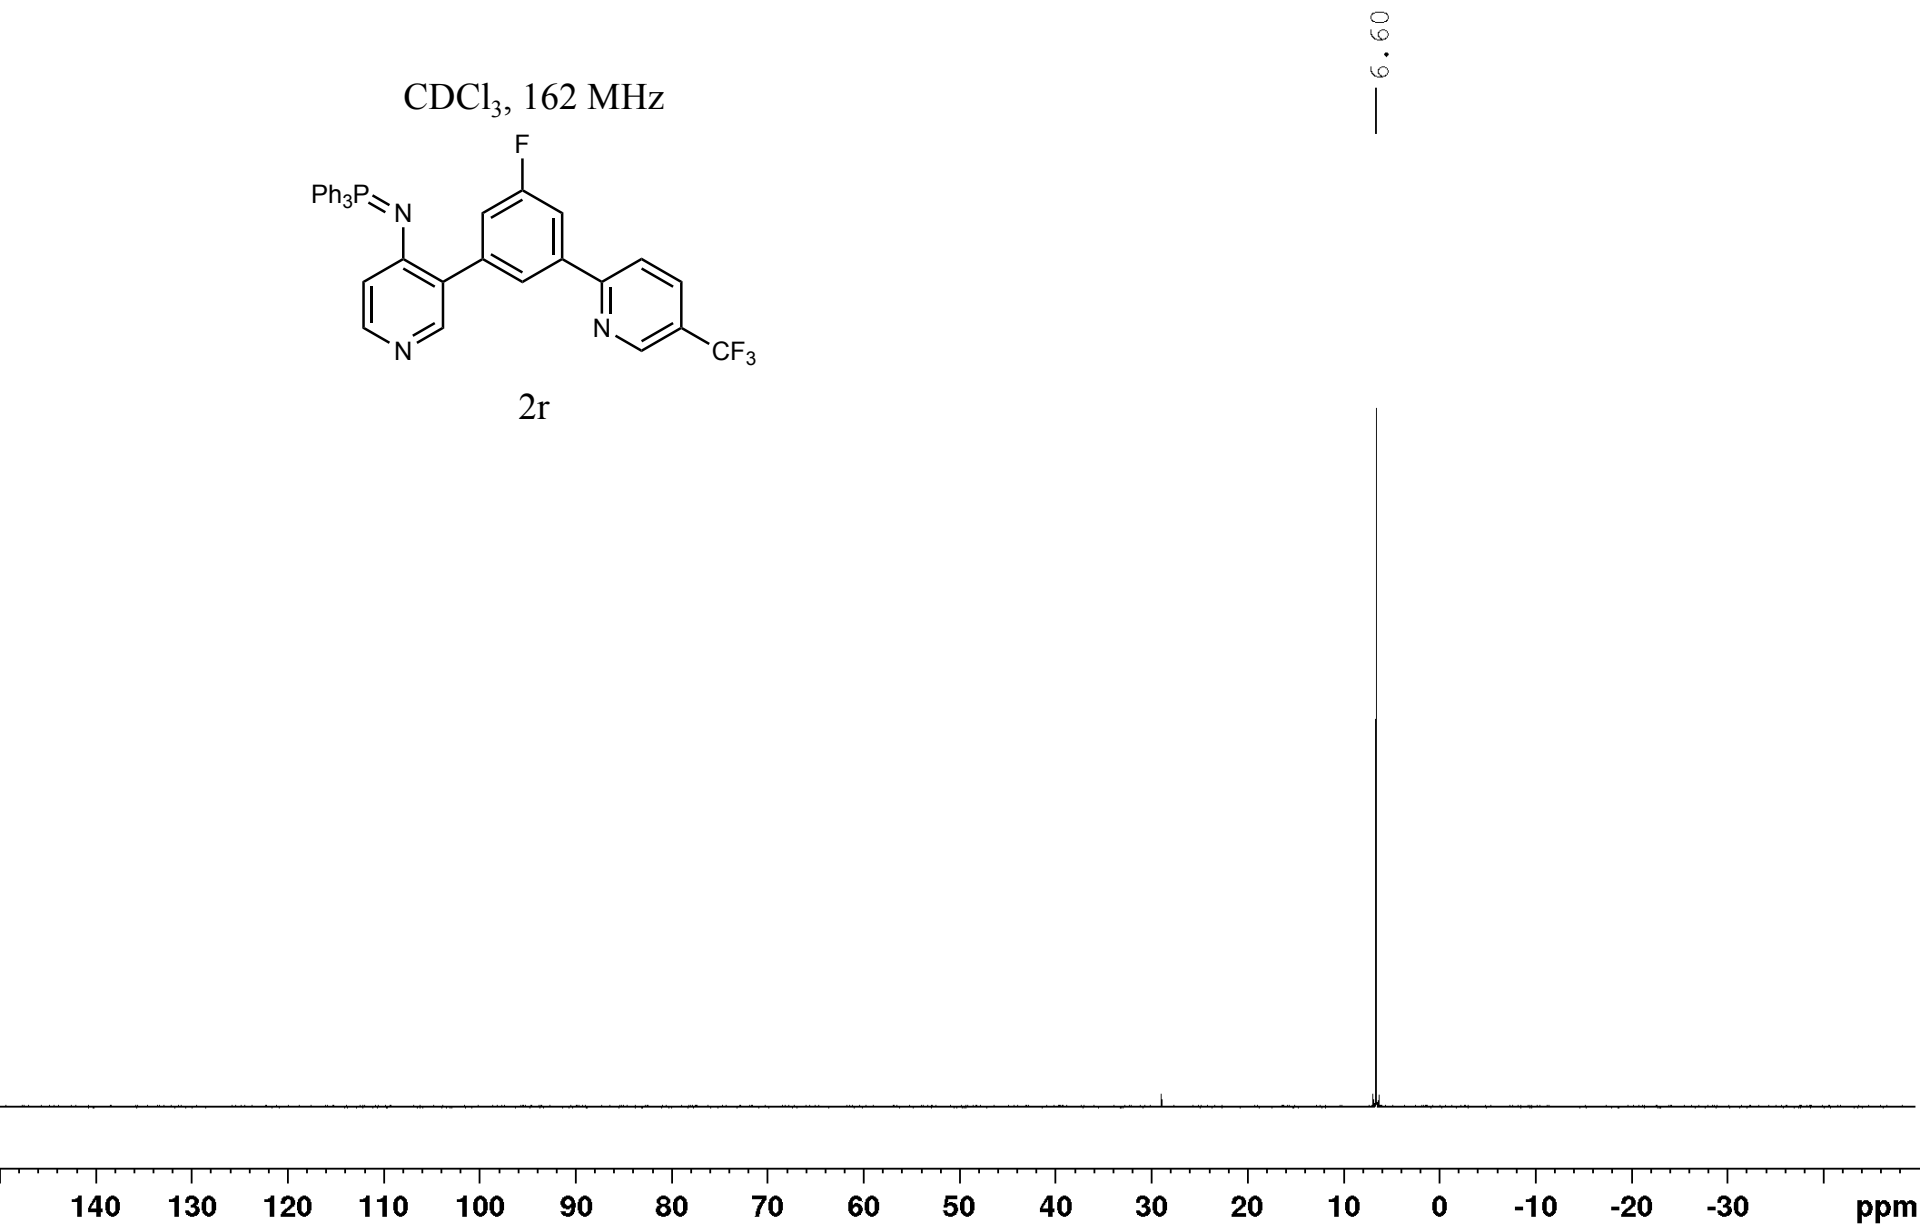

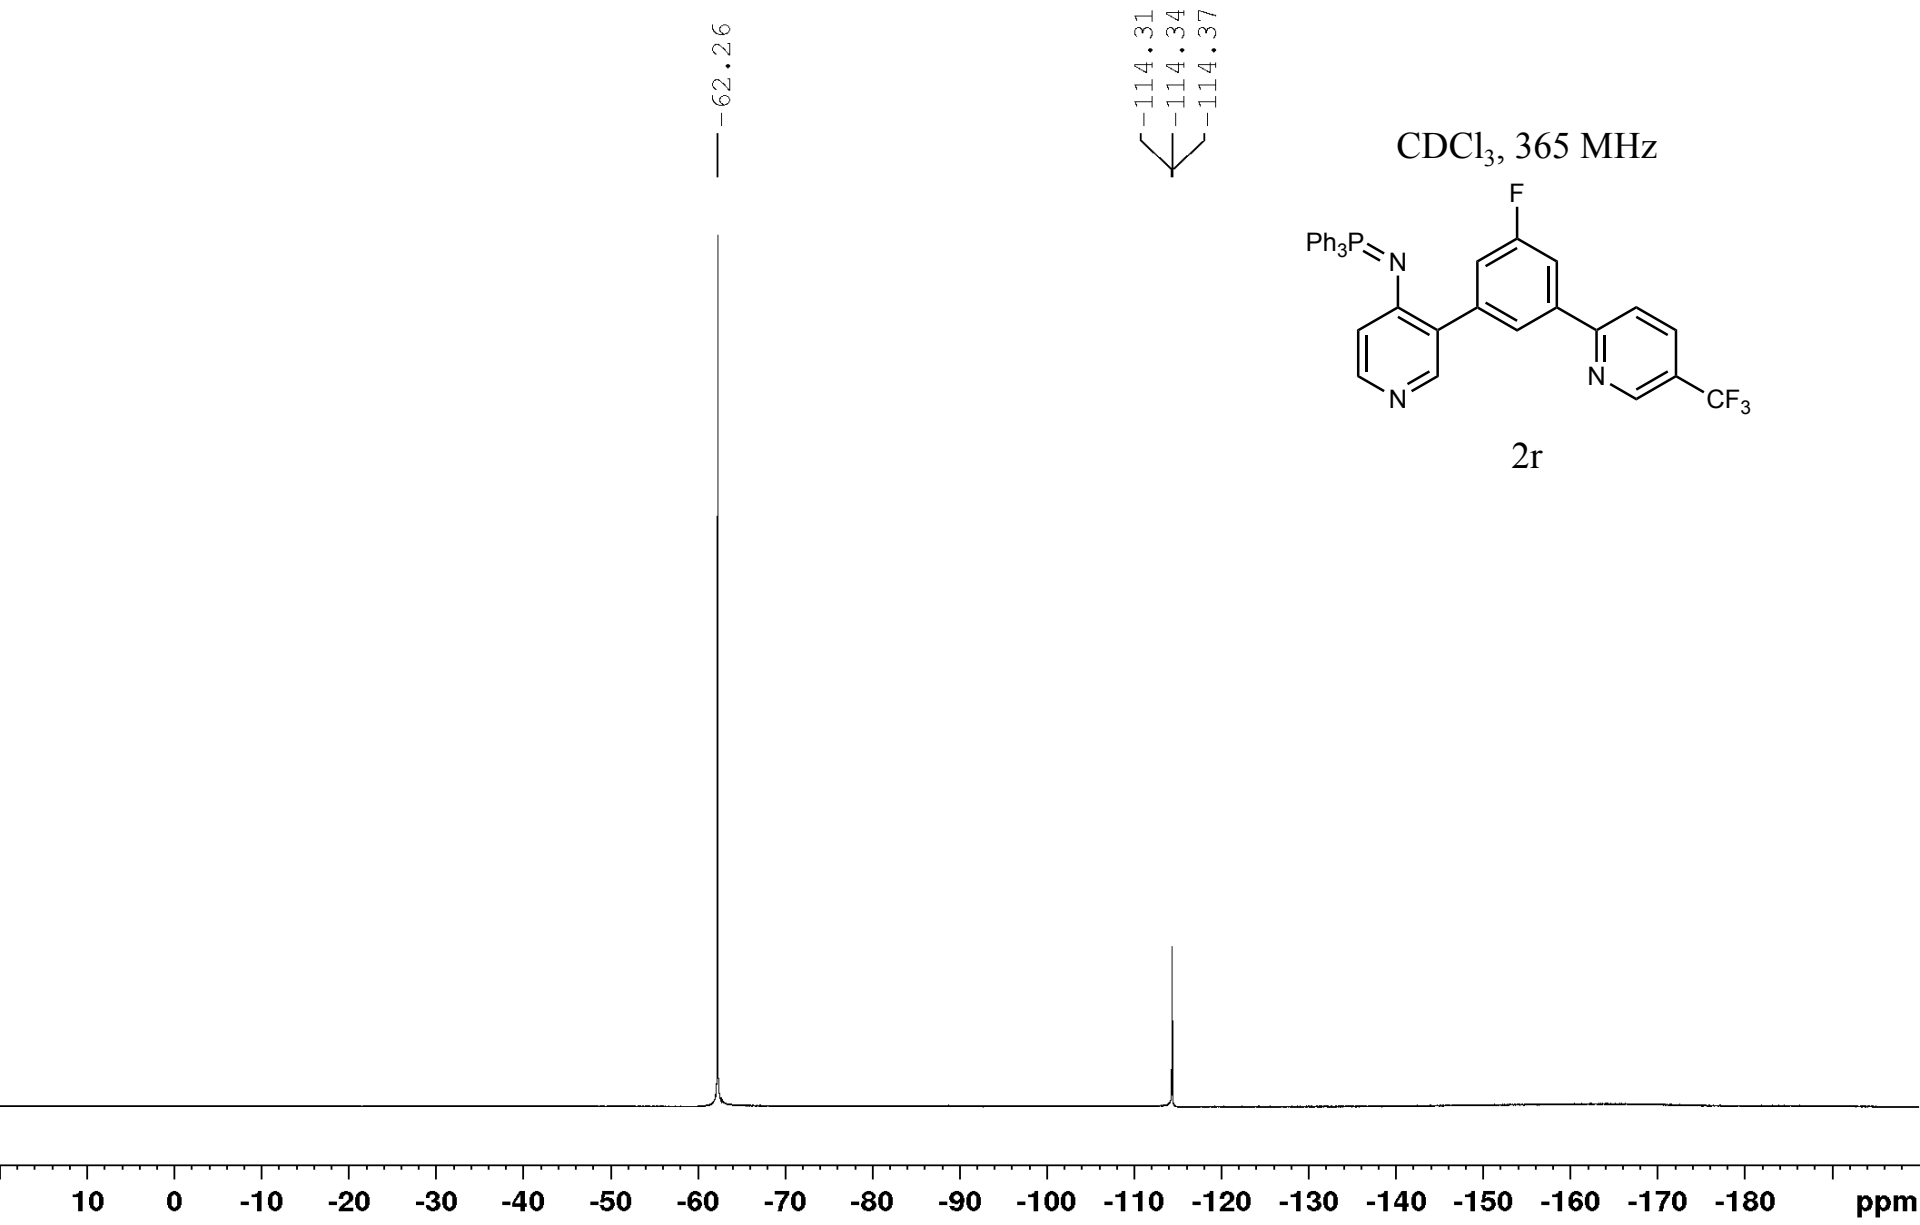

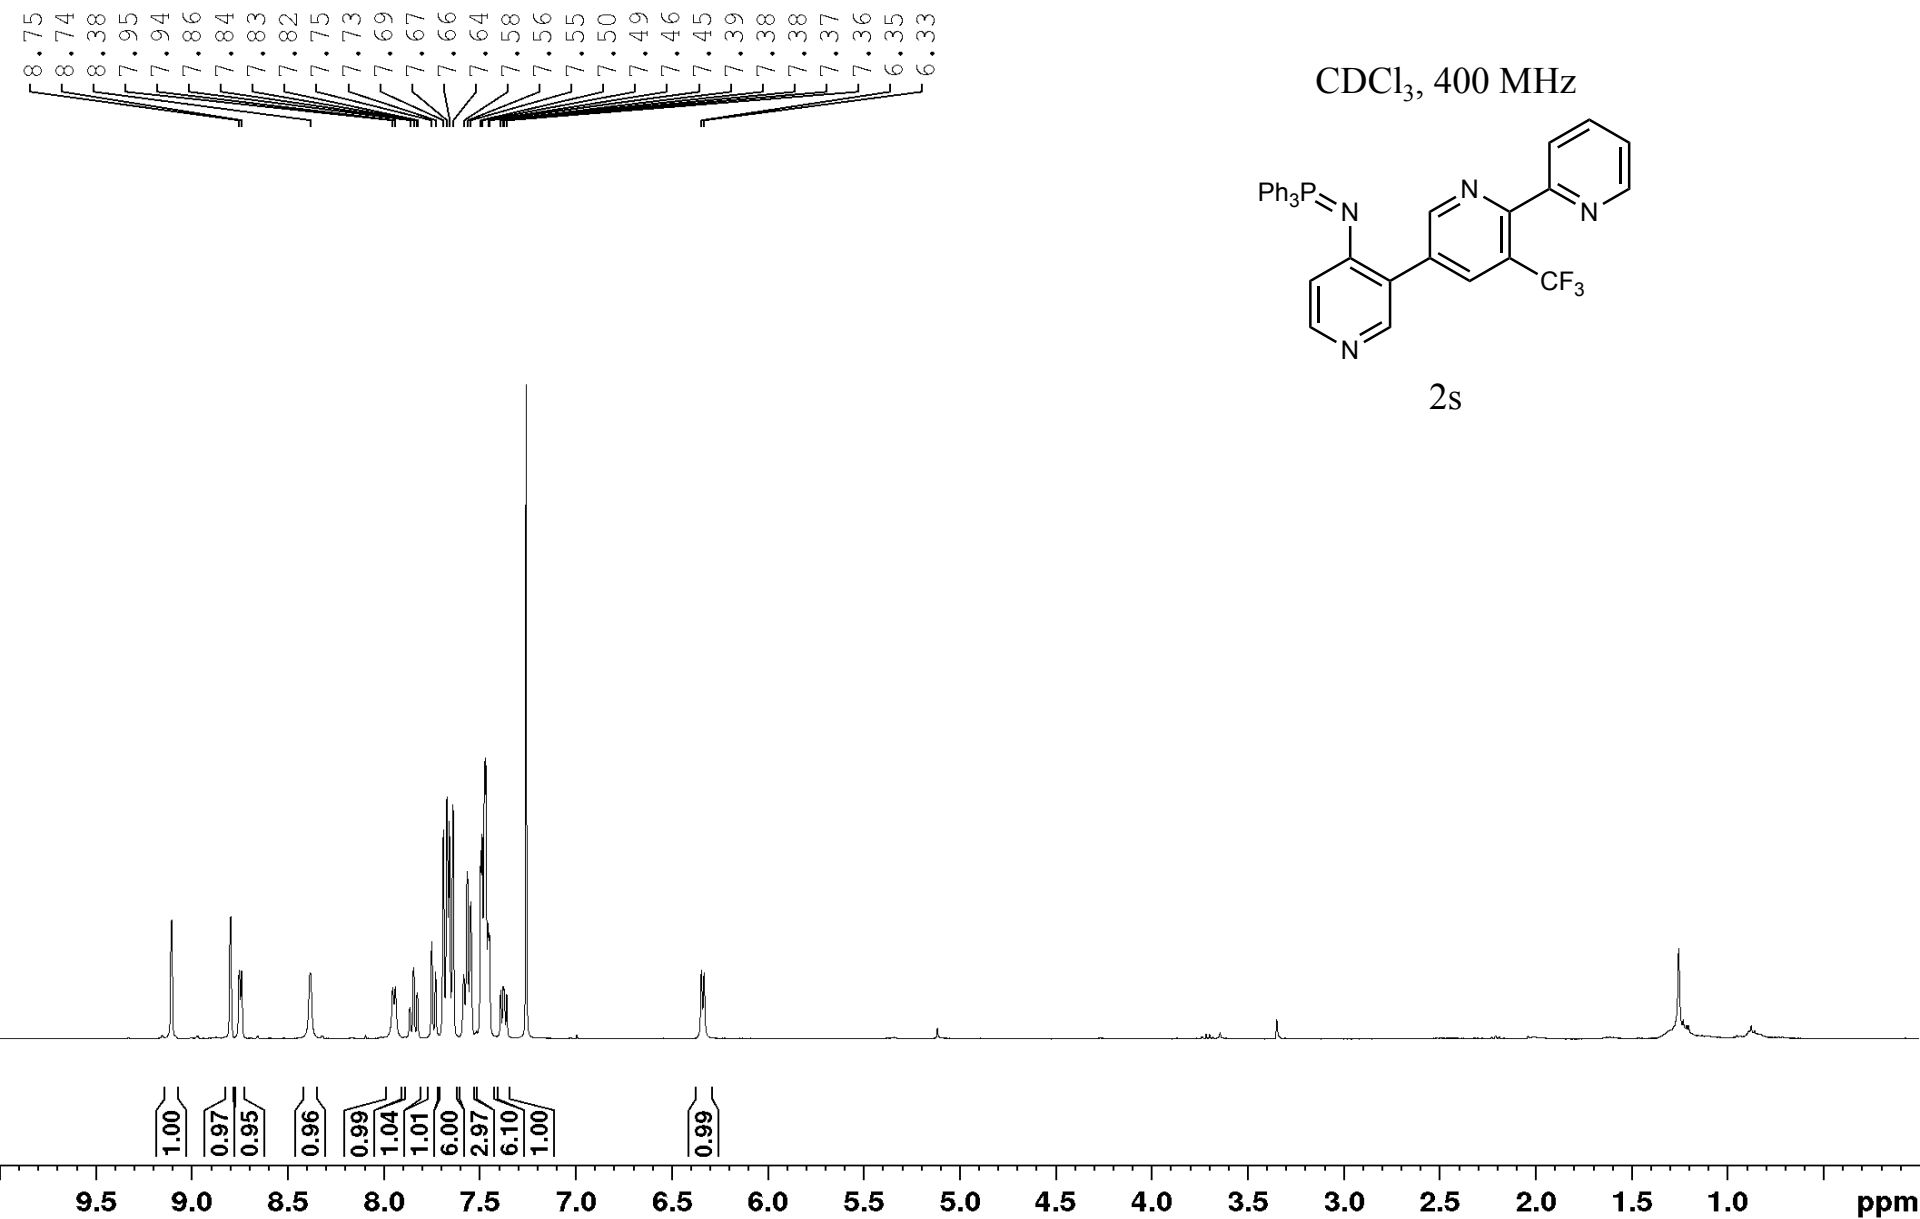



157.29  
156.49  
153.95  
151.86  
149.99  
149.97  
149.62  
149.01  
136.72  
136.67  
136.62  
136.29  
134.19  
132.46  
132.36  
132.33  
129.70  
129.03  
128.91  
128.70  
126.73  
126.50  
125.27  
124.00  
123.80  
123.79  
123.68  
123.27  
122.54  
116.81  
116.69  
77.32  
77.00  
76.68

CDCl<sub>3</sub>, 100 MHz

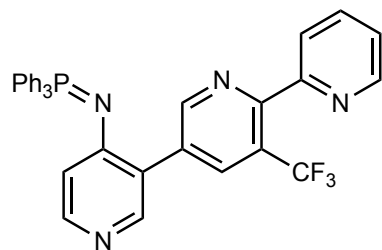

2s

200 192 184 176 168 160 152 144 136 128 120 112 104 96 88 80 72 64 56 48 40 32 24 16 ppm

CDCl<sub>3</sub>, 162 MHz

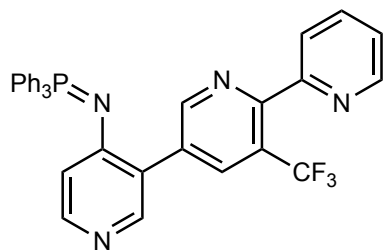

2s

89.68

140 130 120 110 100 90 80 70 60 50 40 30 20 10 0 -10 -20 -30 ppm

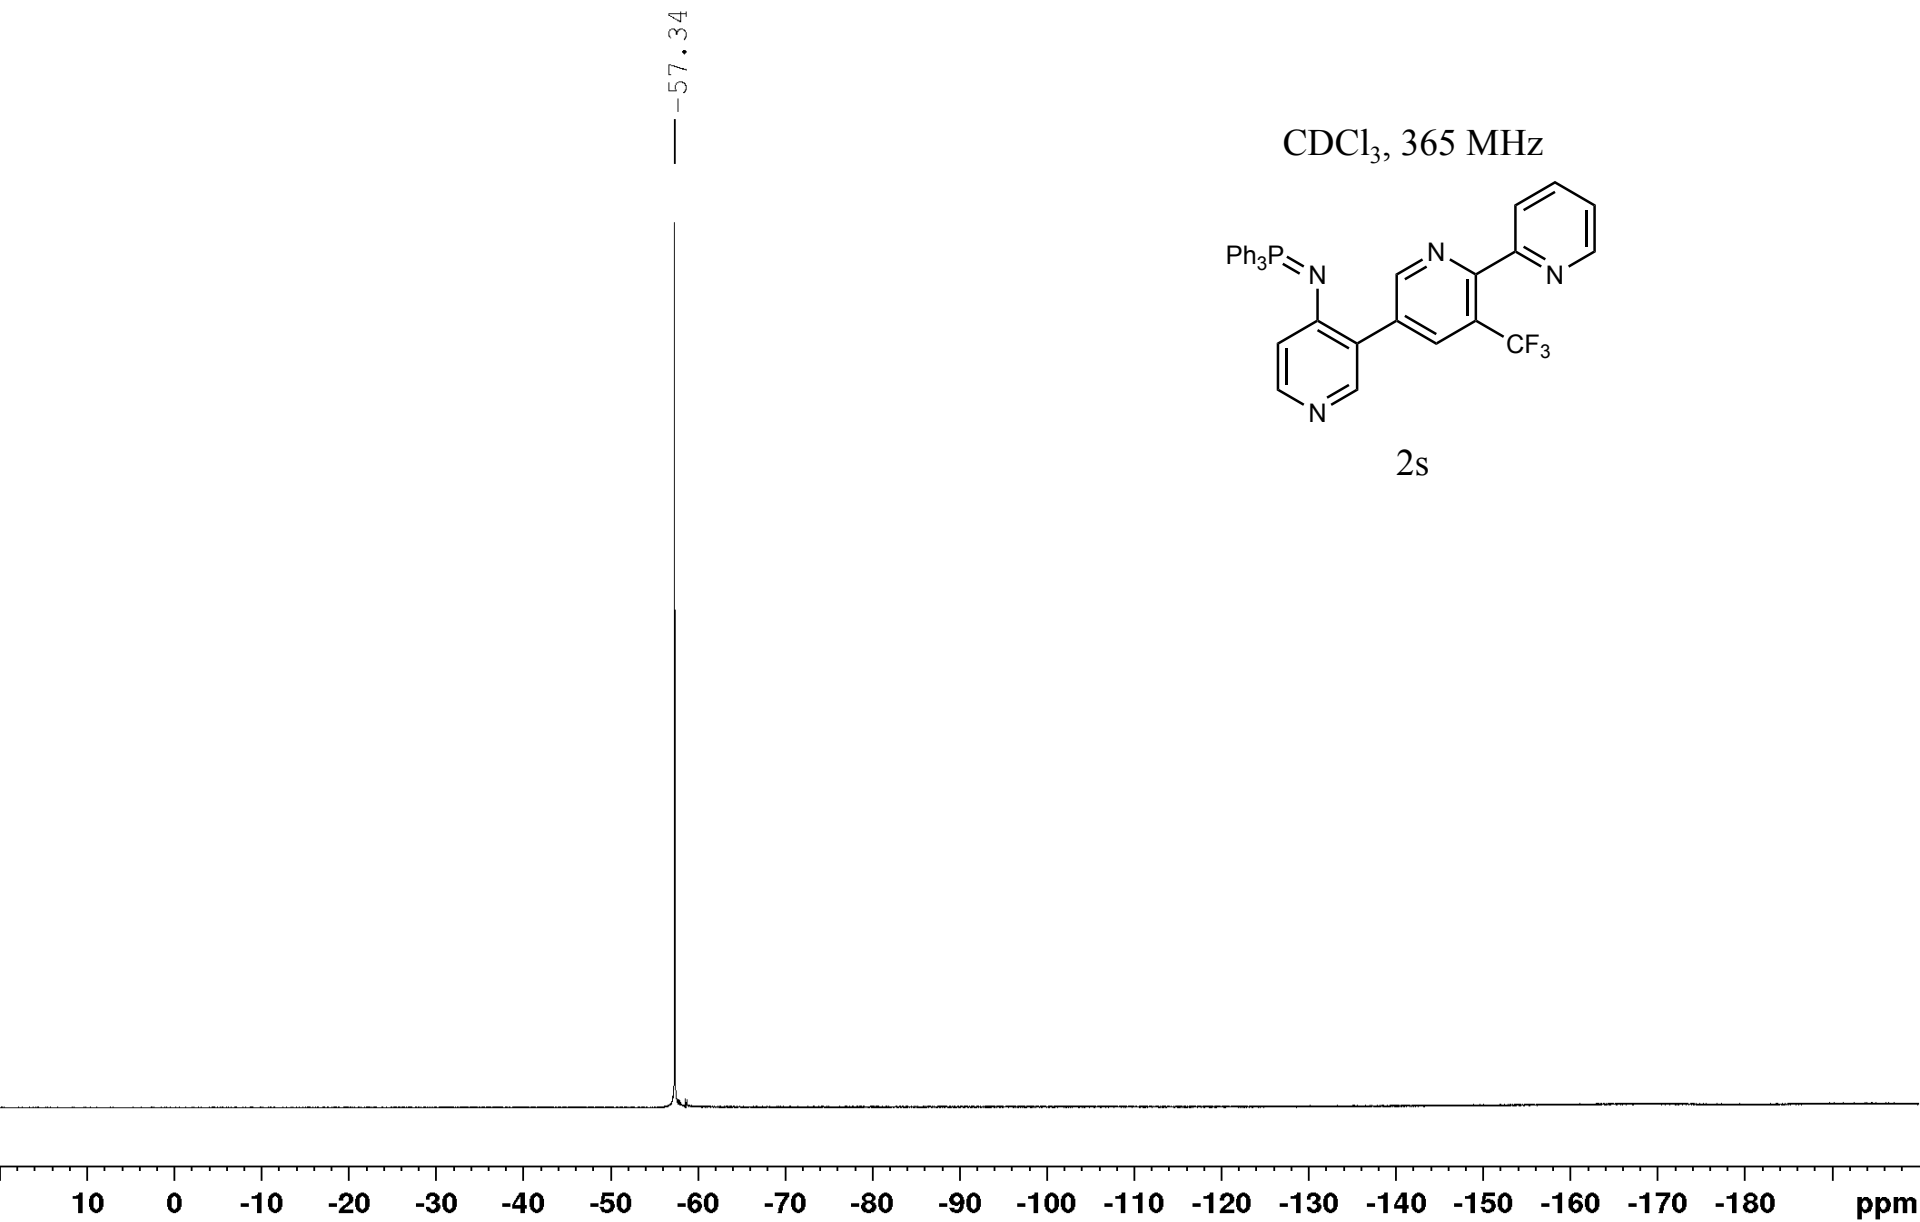

CDCl<sub>3</sub>, 365 MHz

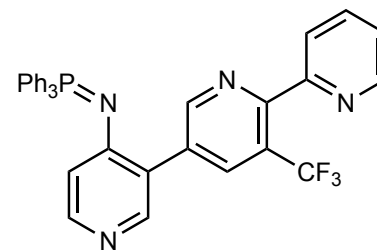

2s

8.01  
7.99  
7.68  
7.66  
7.65  
7.63  
7.57  
7.55  
7.53  
7.47  
7.46  
7.45  
7.44  
7.43  
7.42  
7.14  
7.12  
7.10  
7.08  
6.46  
6.45  
6.40

3.83  
3.81  
3.79  
2.28  
2.26  
2.24  
2.23  
2.21  
2.19  
2.18  
2.17  
2.14  
2.00  
1.98  
1.96  
1.95  
1.94  
1.93  
1.92

CDCl<sub>3</sub>, 400 MHz

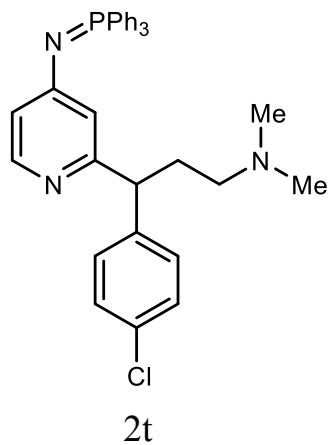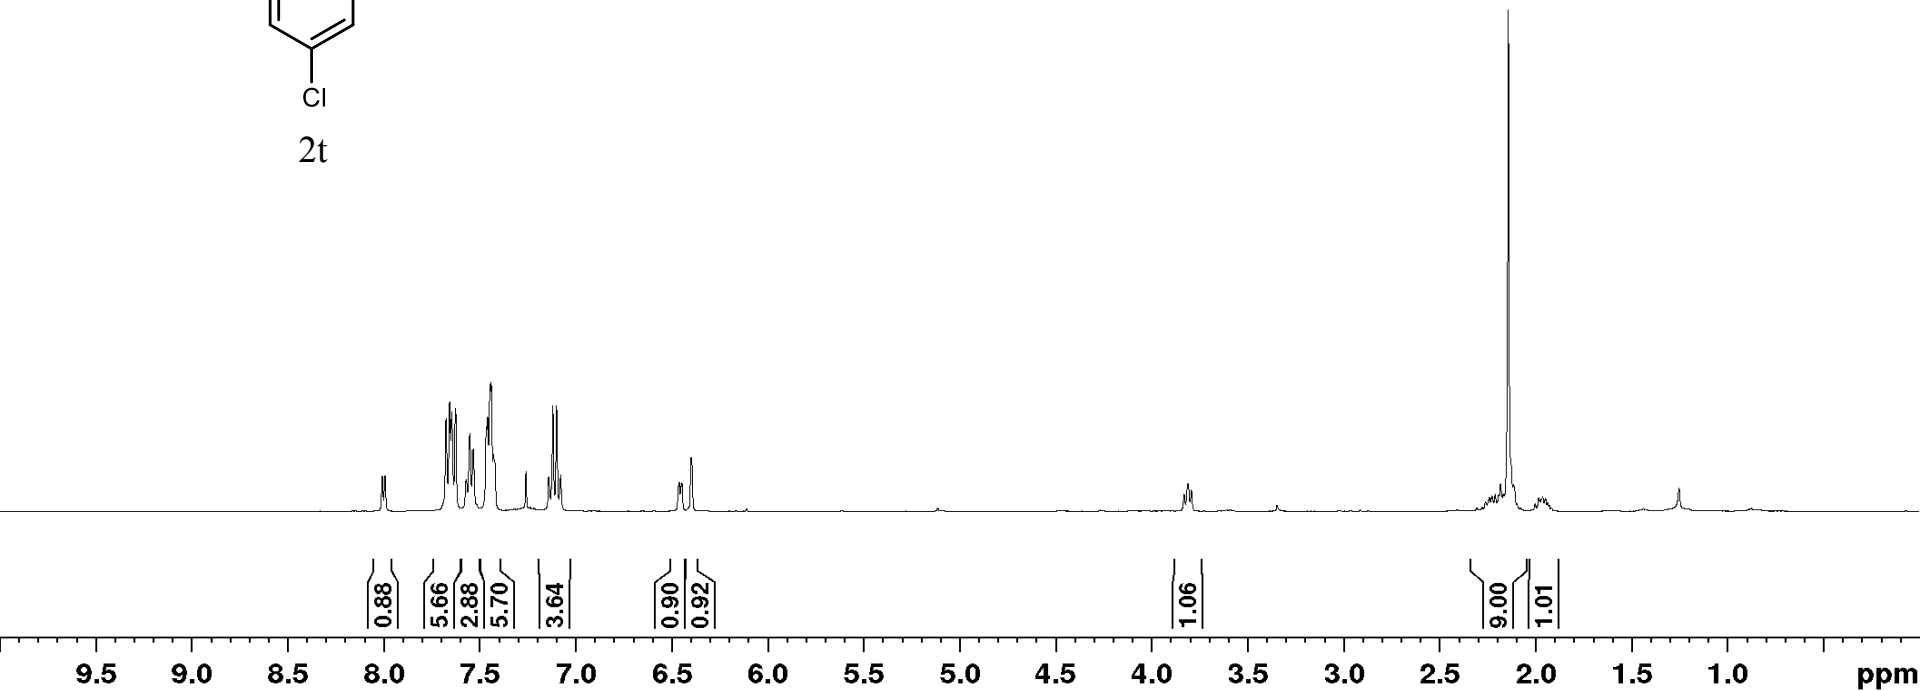

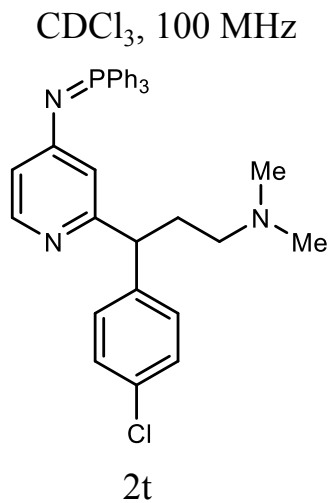

162.62  
159.22  
148.81  
142.45  
132.53  
132.43  
132.13  
132.11  
131.54  
129.95  
129.40  
128.97  
128.85  
128.73  
117.09  
116.98  
116.90  
116.78

77.30  
76.98  
76.66

57.92  
50.66  
45.42

32.53

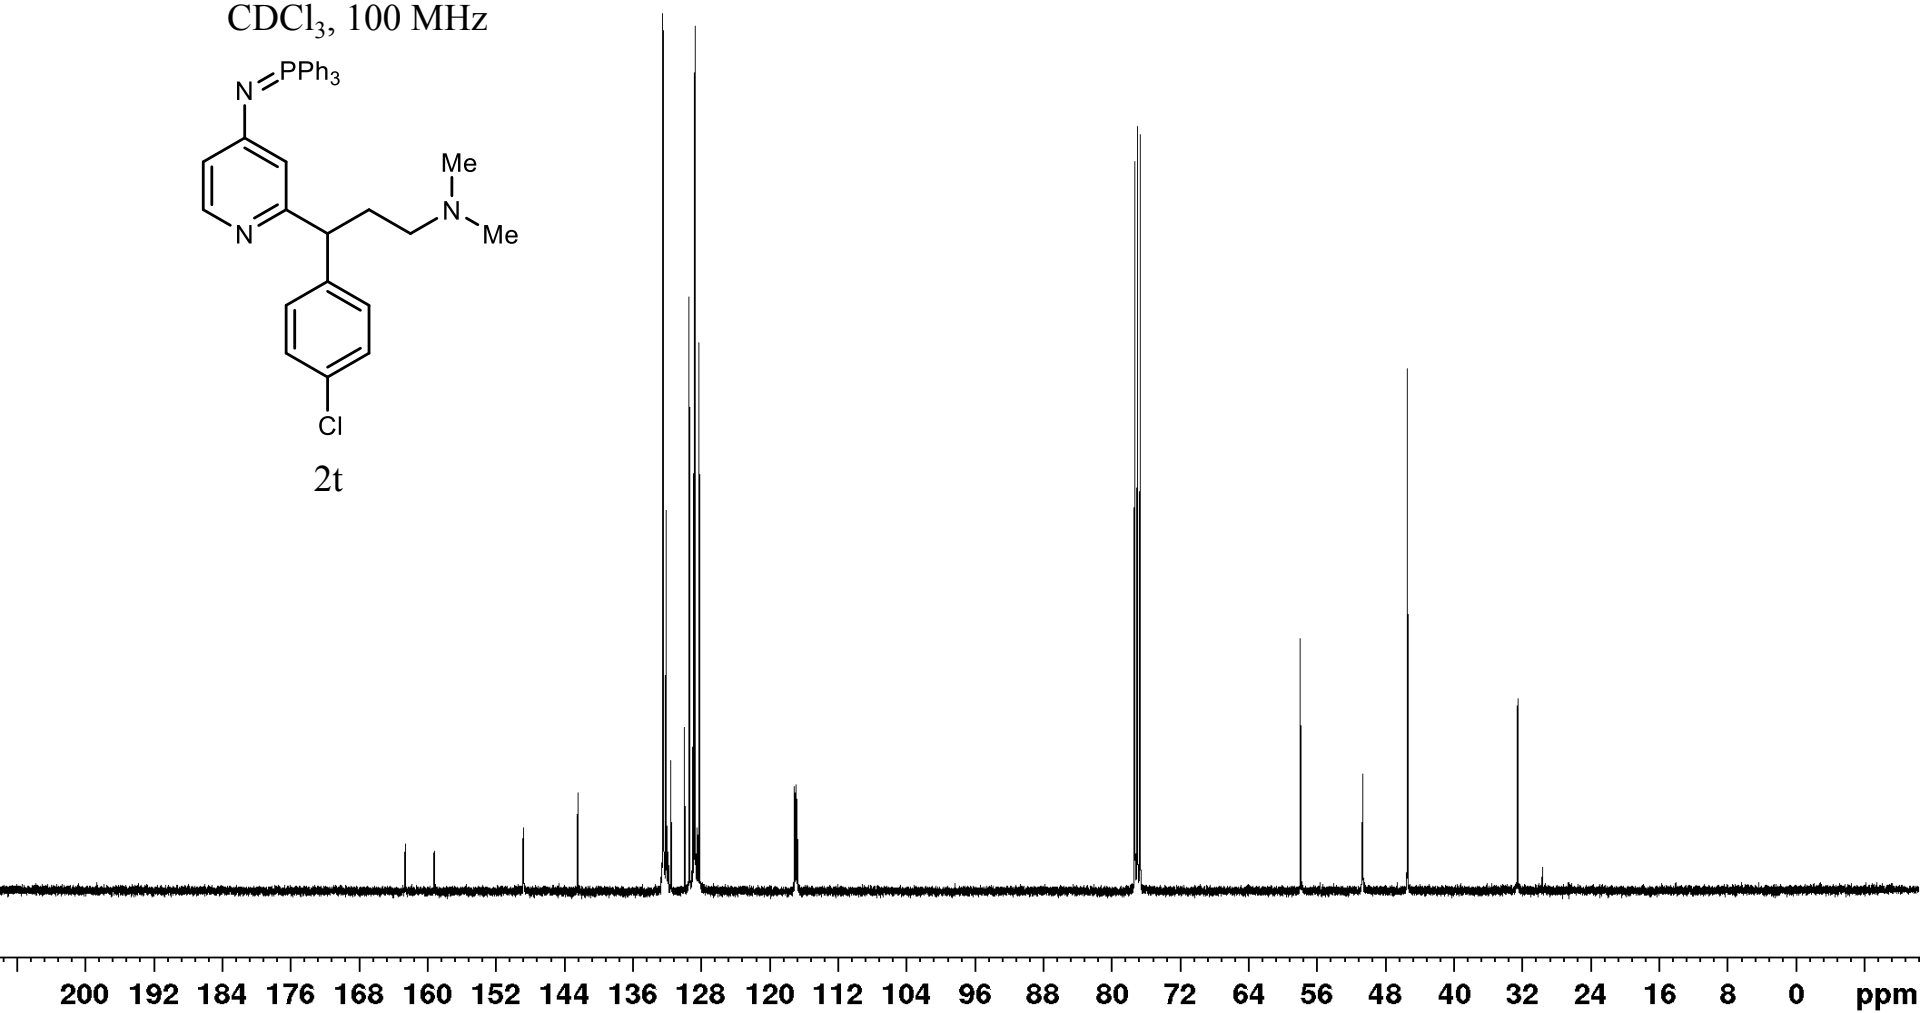

CDCl<sub>3</sub>, 162 MHz

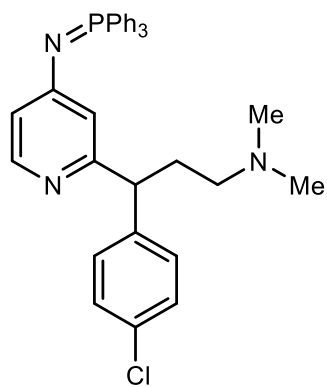

2t

8.06

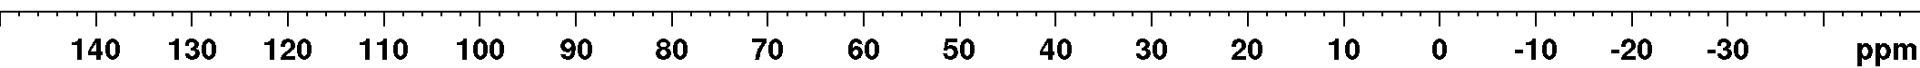

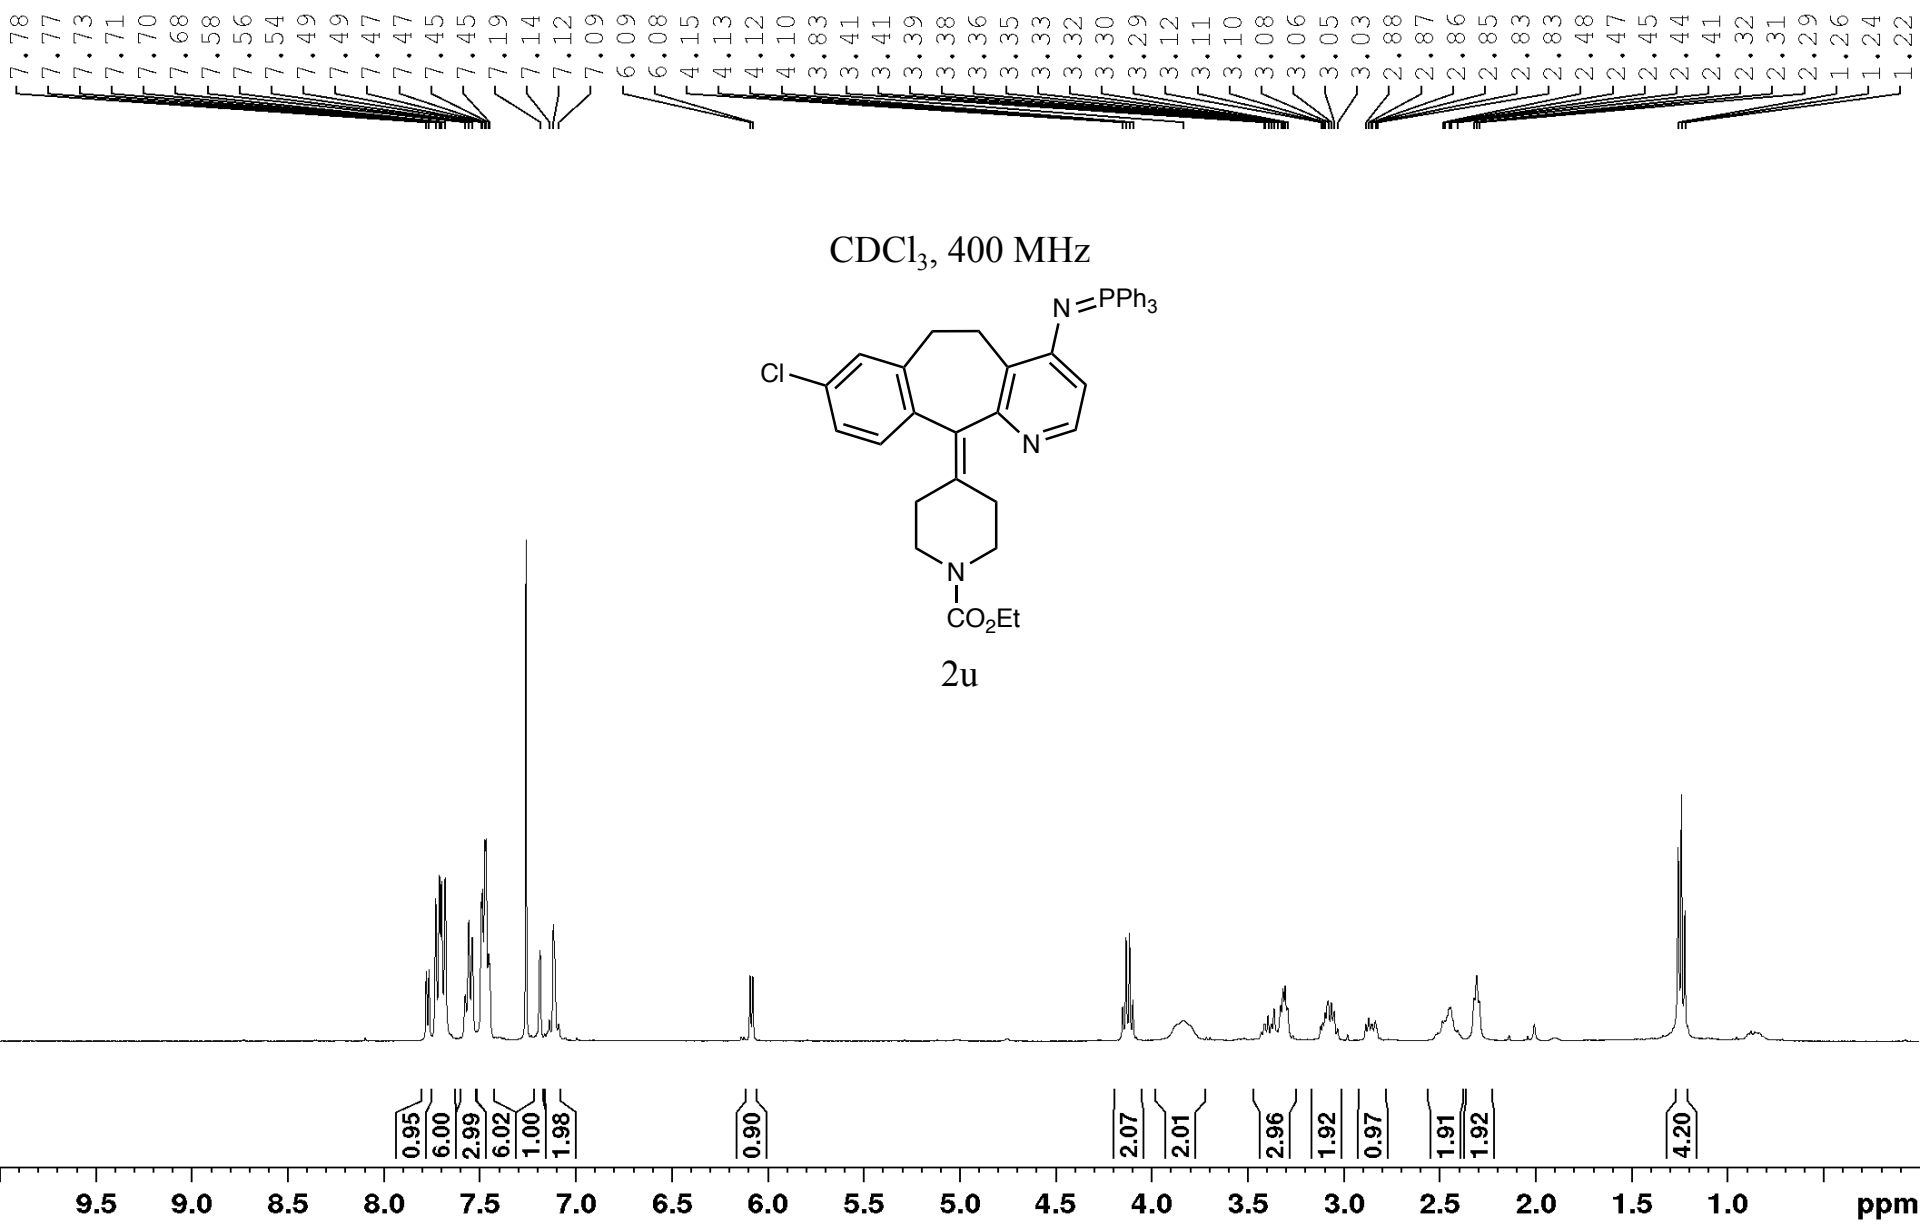

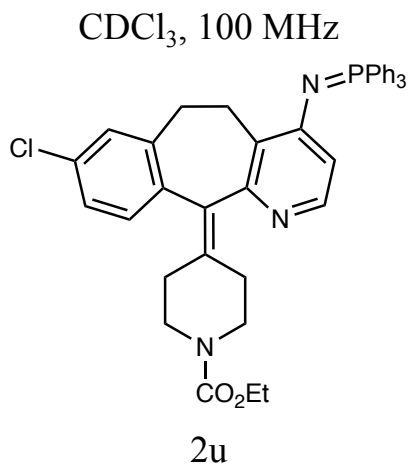

CDCl<sub>3</sub>, 100 MHz

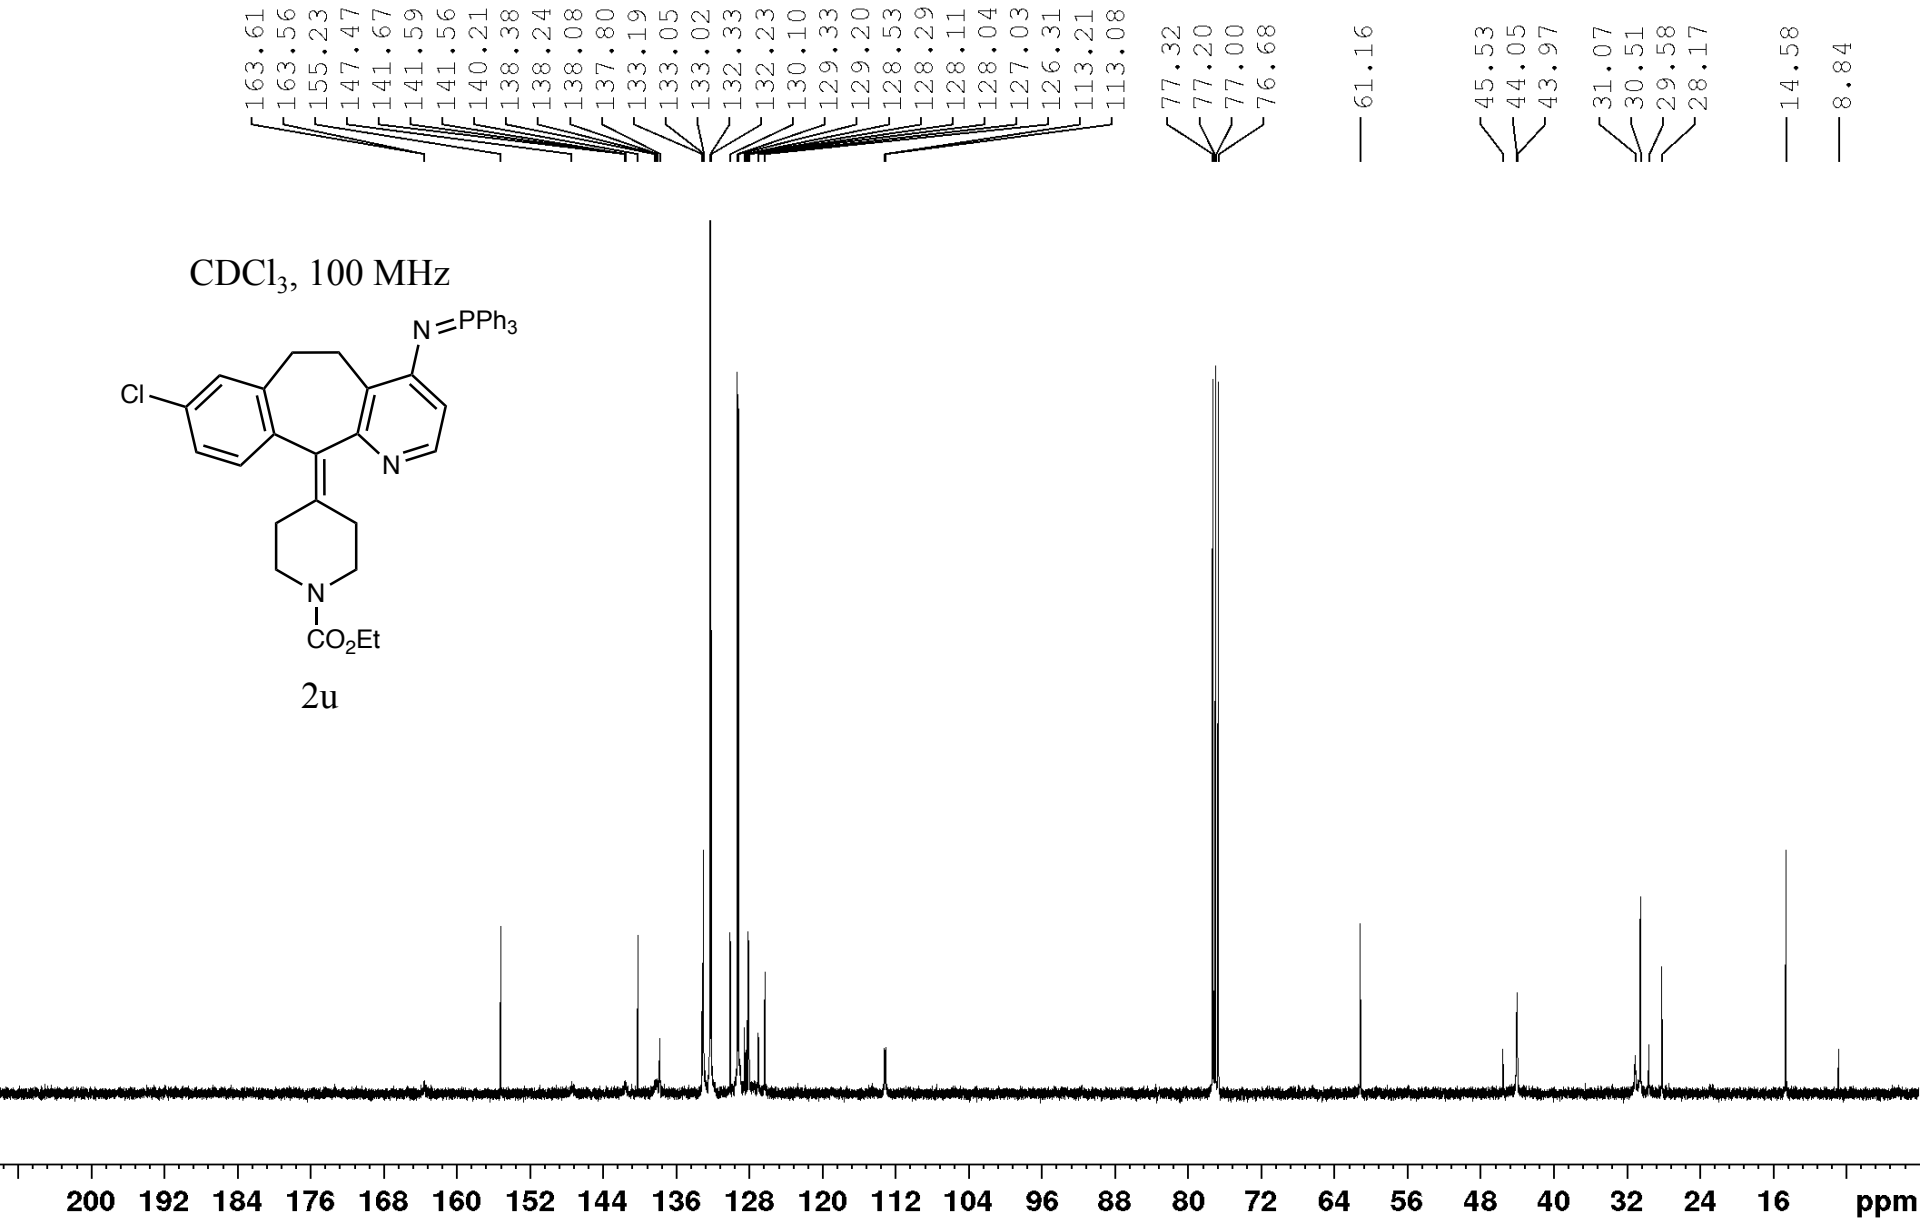



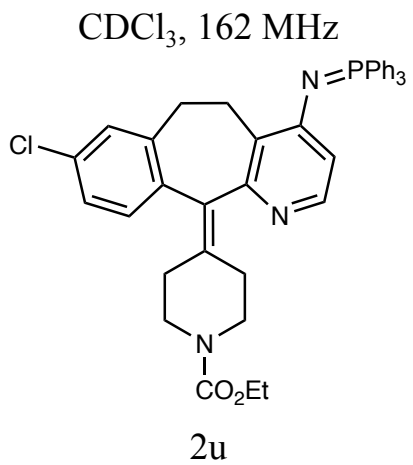

—11.48

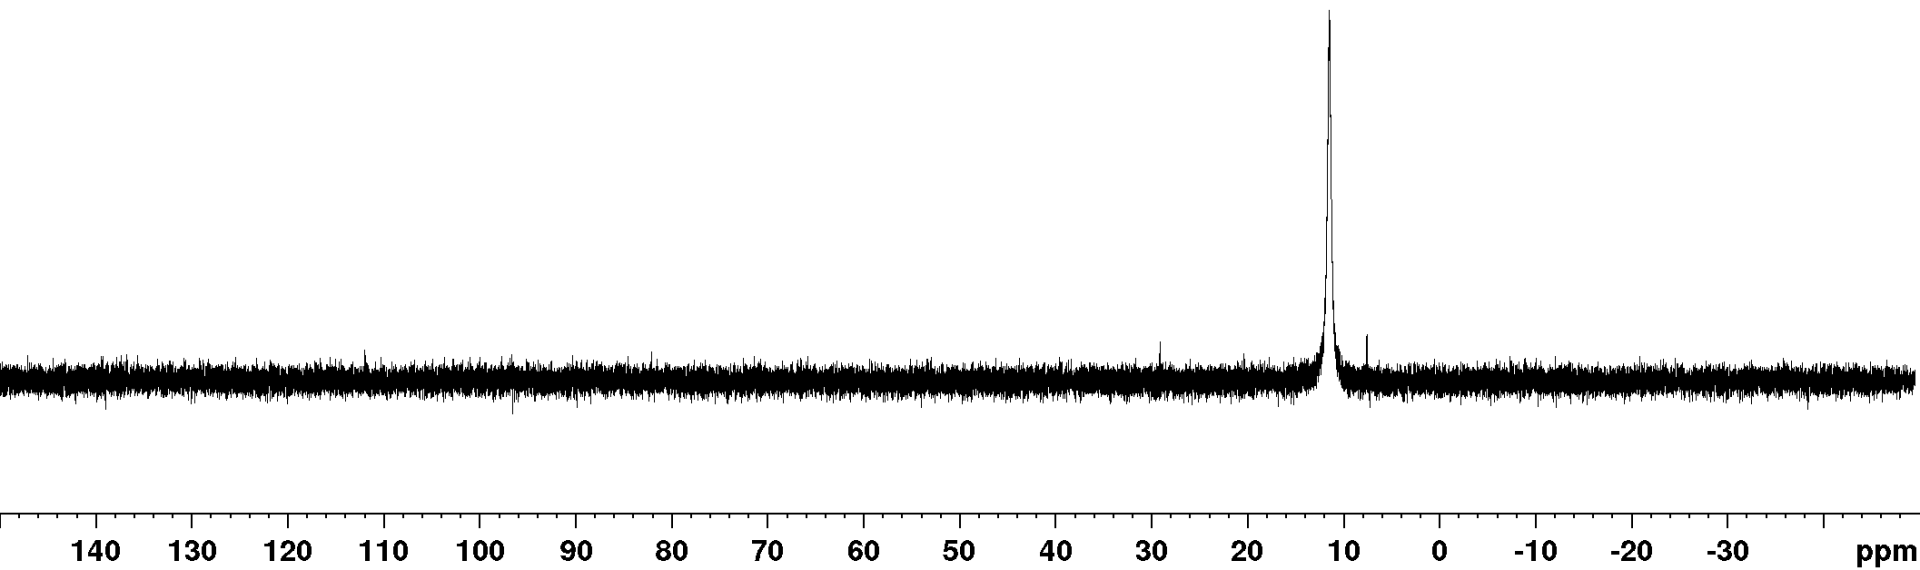

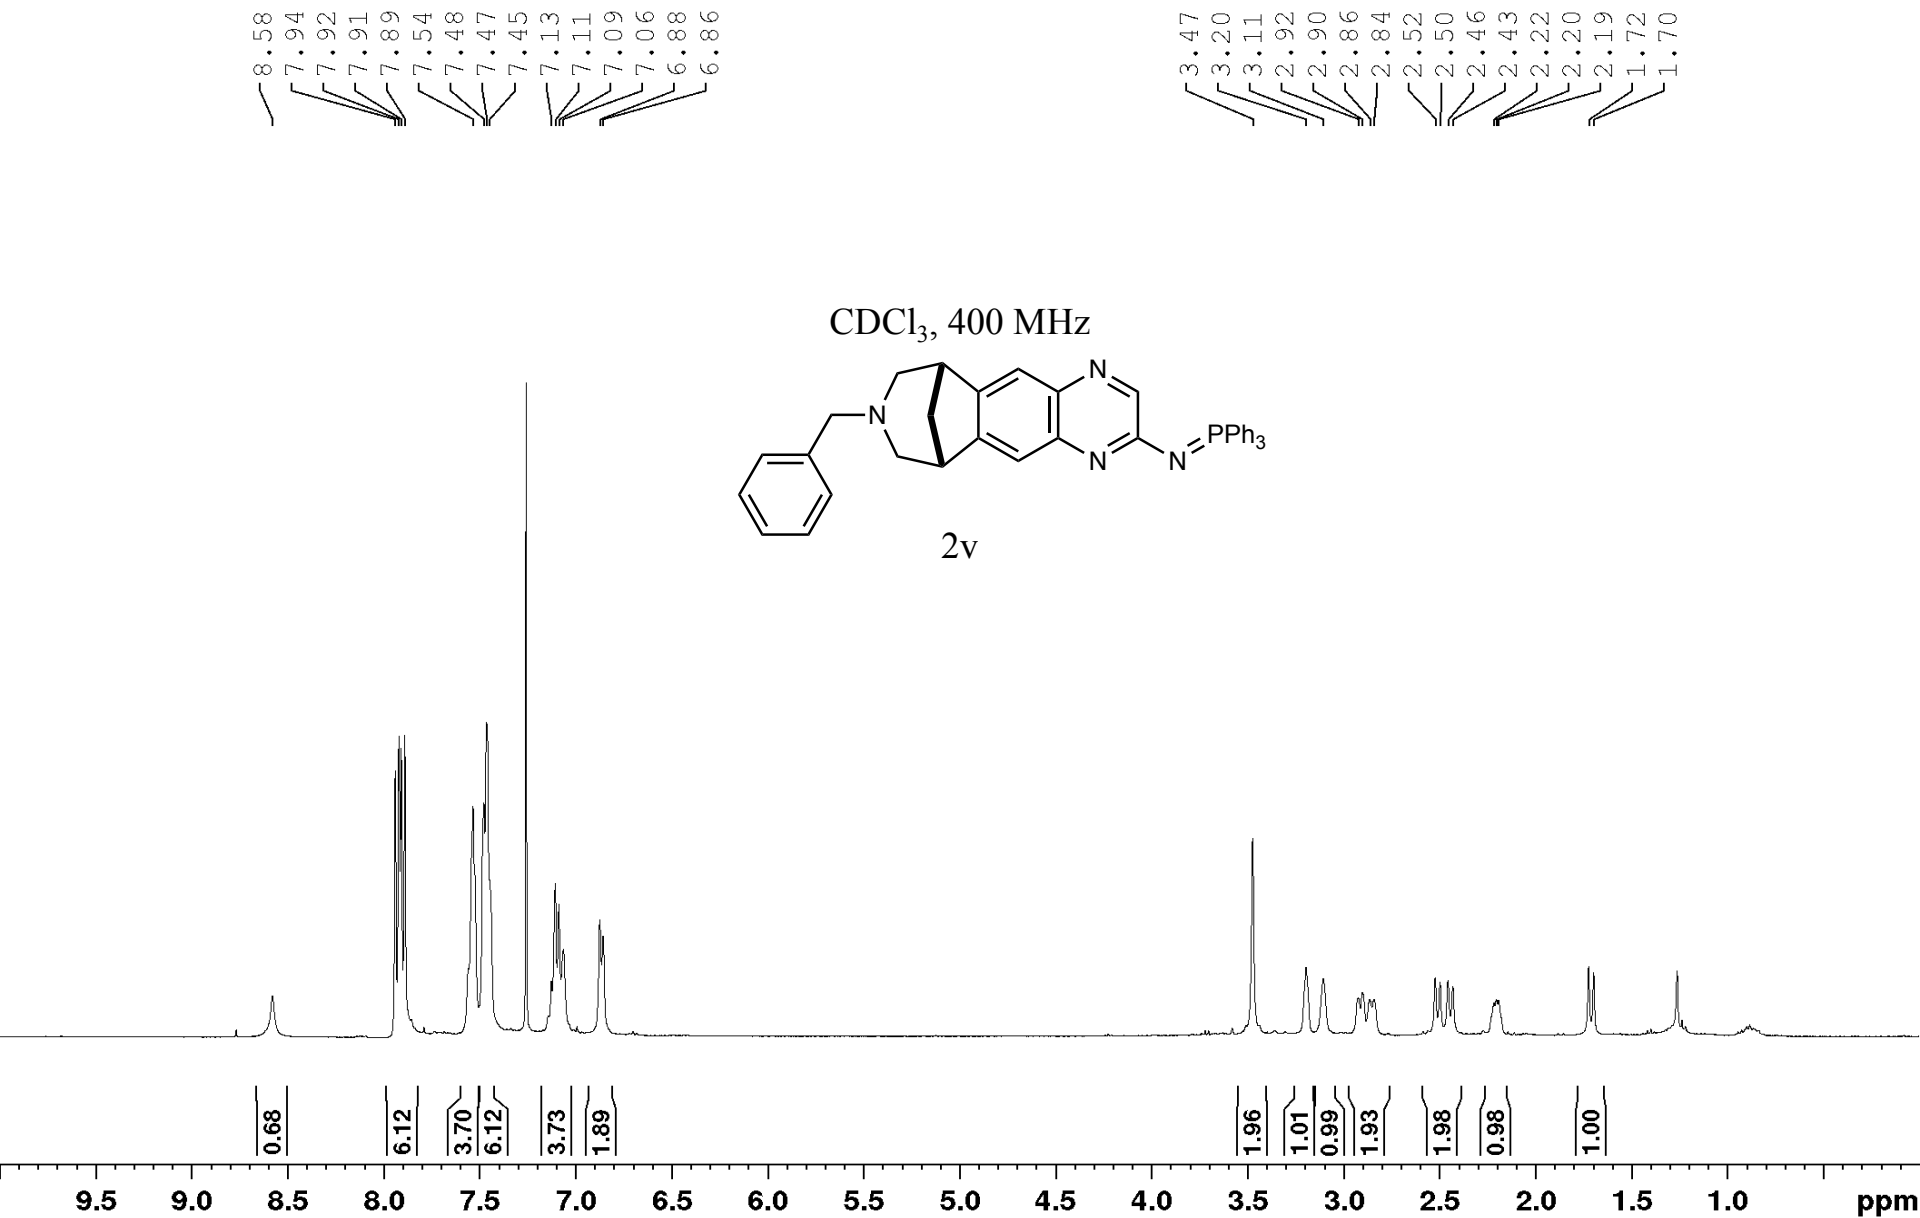

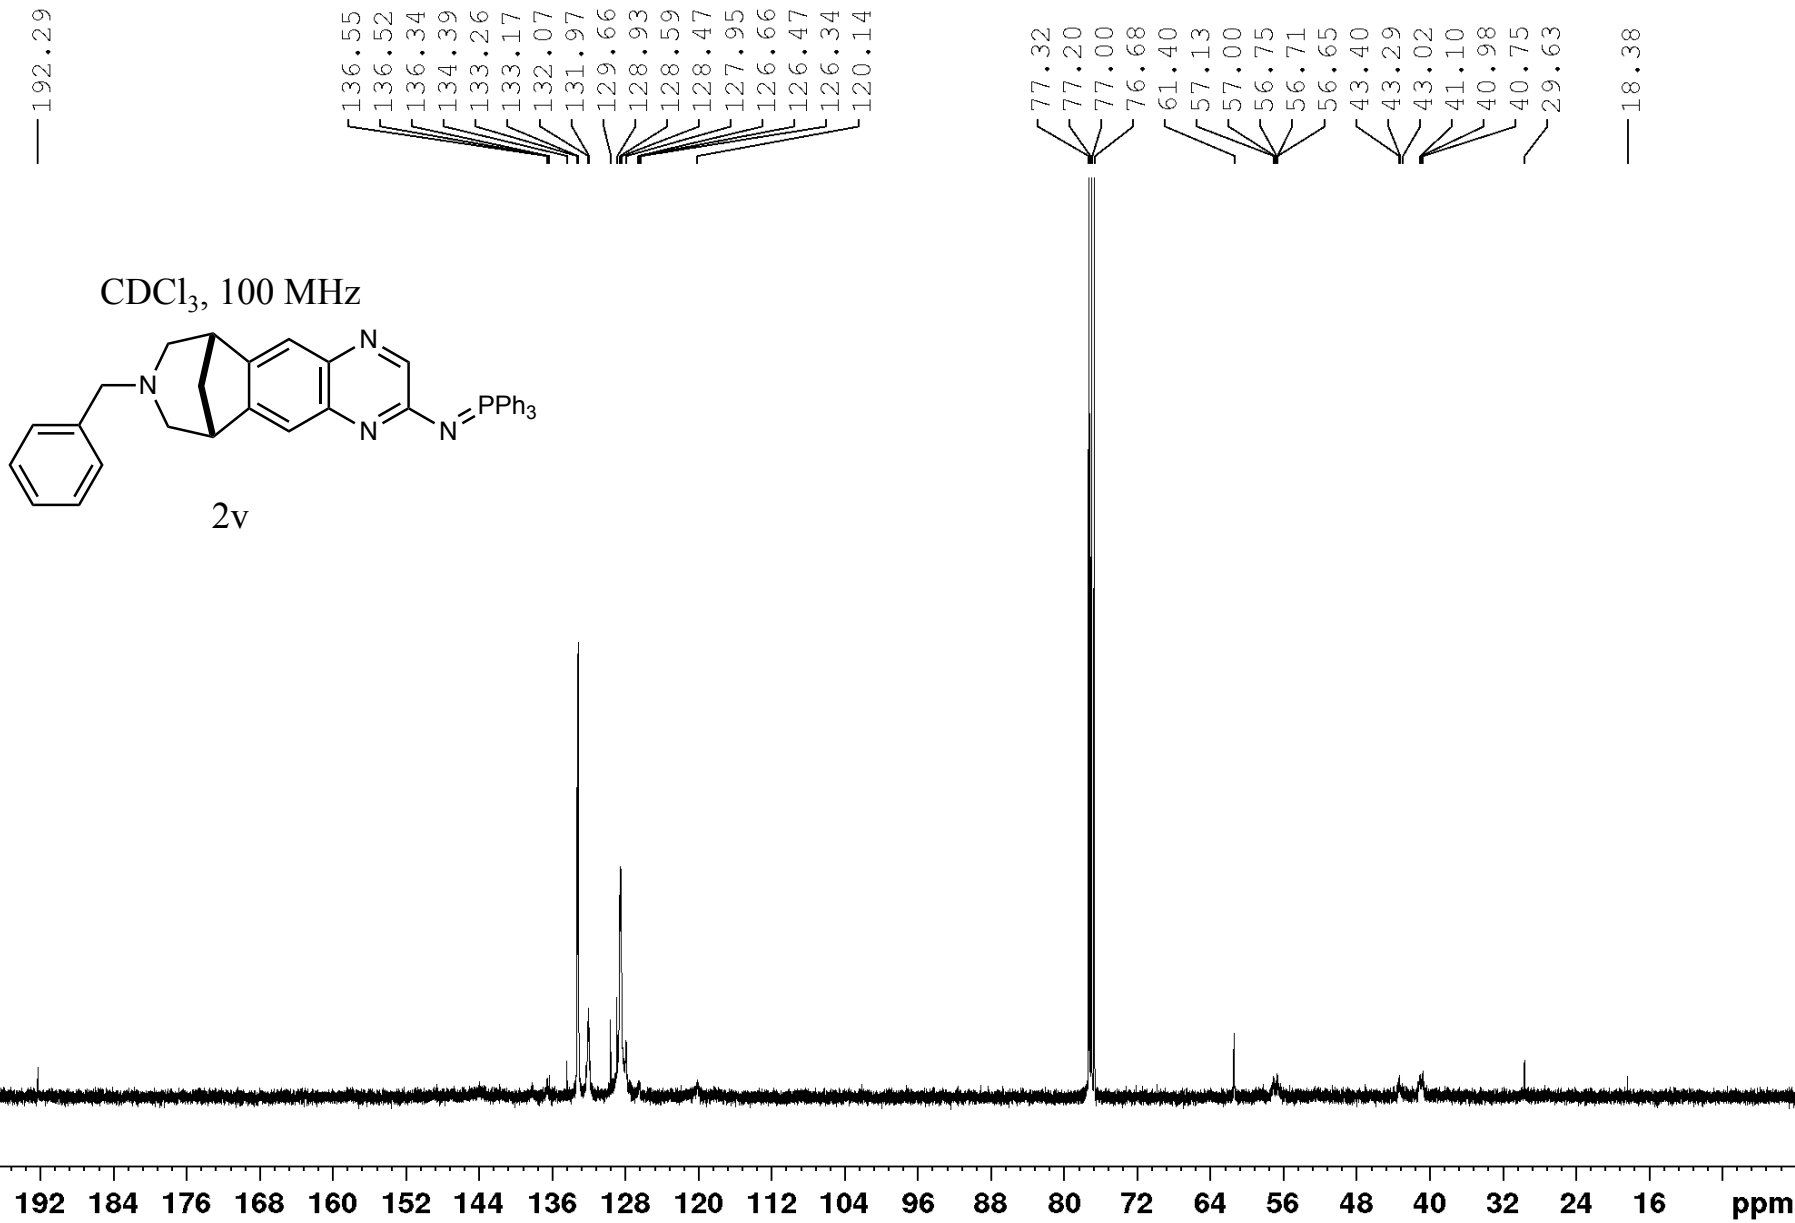

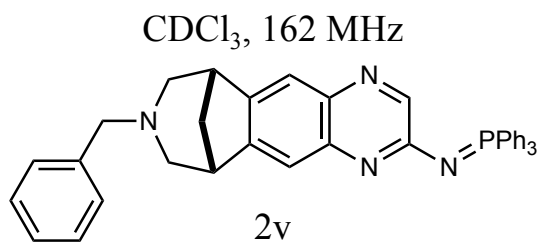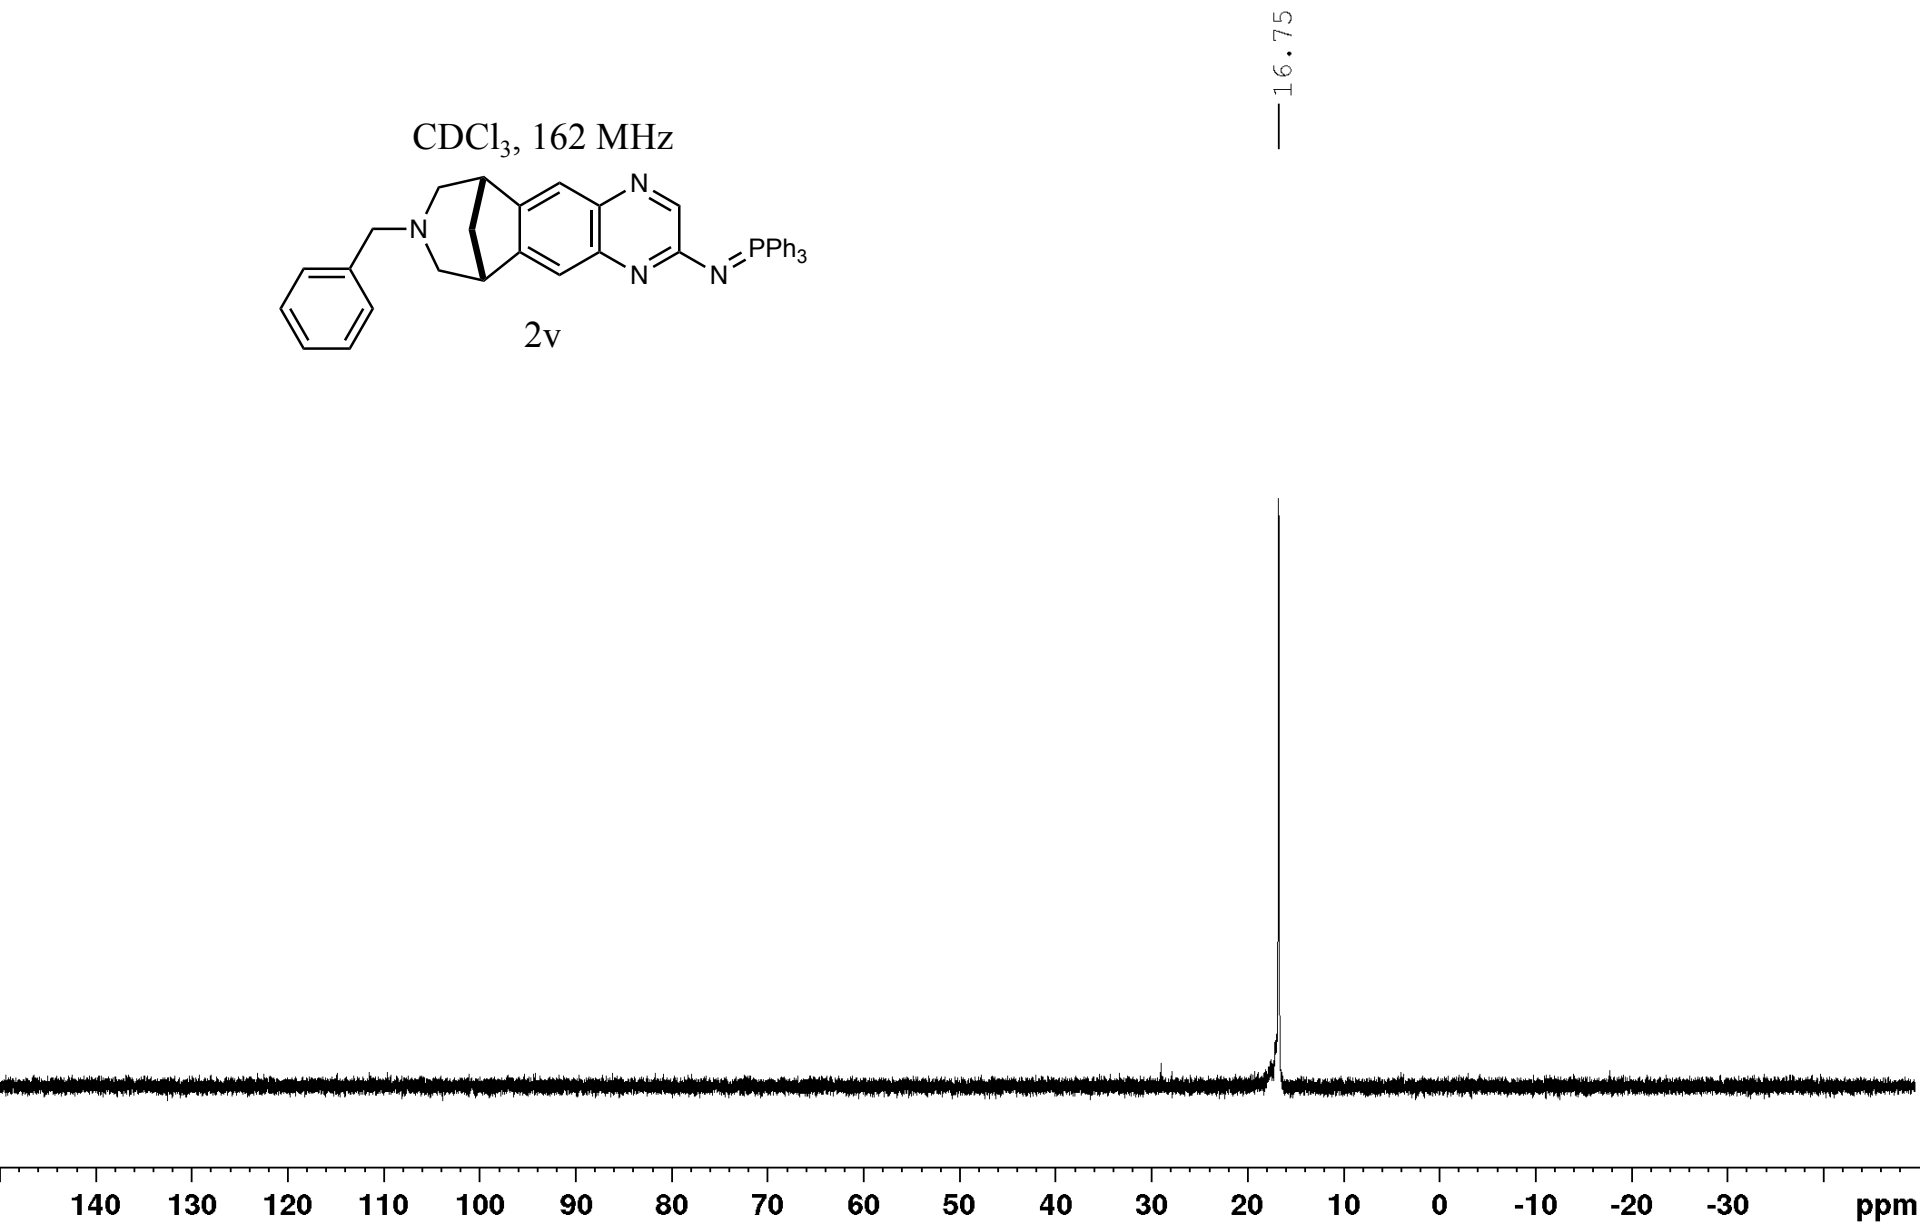

8.72  
8.72  
8.33  
8.33  
7.63  
7.63  
7.56  
7.54  
7.53  
7.51  
7.42  
7.41  
7.40  
7.39  
7.38  
7.37  
7.22  
7.21  
7.21  
7.19  
7.17  
5.78

2.98

2.14

CDCl<sub>3</sub>, 400 MHz

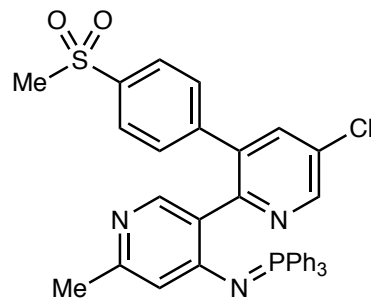

2w

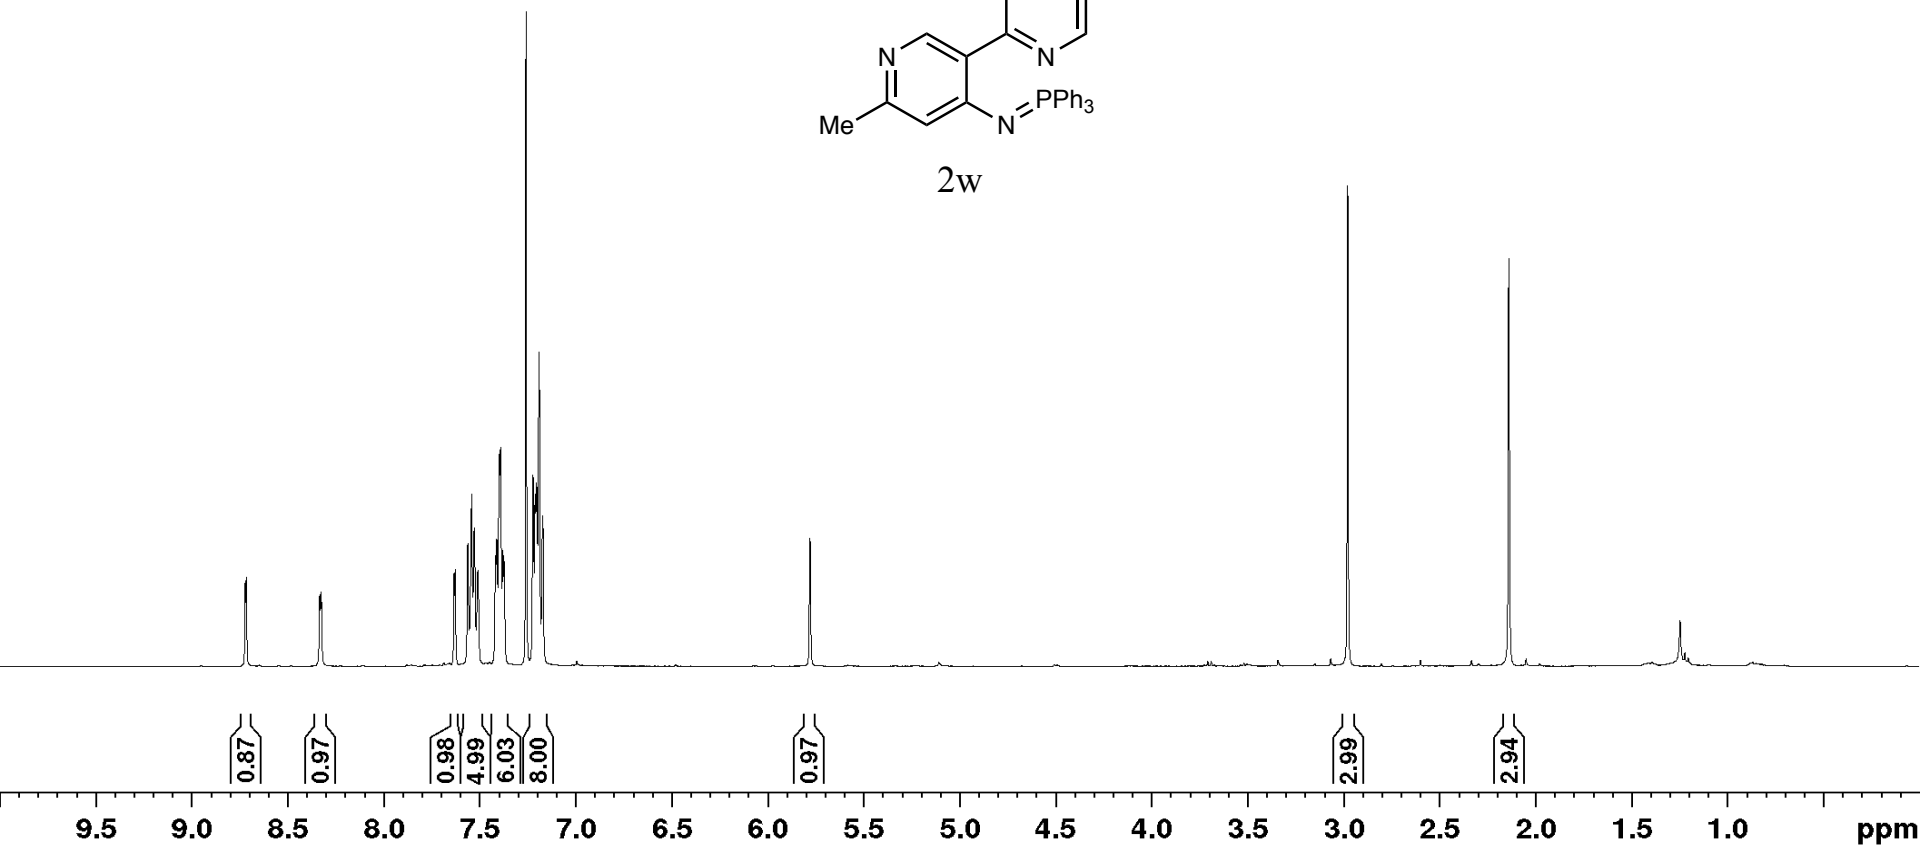

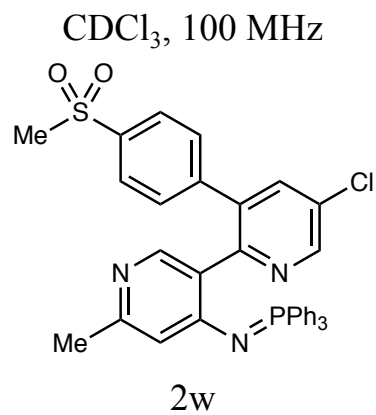

157.41  
156.47  
154.99  
148.79  
147.48  
144.96  
139.05  
137.40  
136.08  
132.28  
132.25  
132.19  
132.09  
132.00  
130.15  
129.50  
128.81  
128.69  
128.50  
128.31  
128.07  
126.85  
115.12  
115.01

77.32  
77.20  
77.00  
76.68

— 44.48

— 29.65

— 23.83

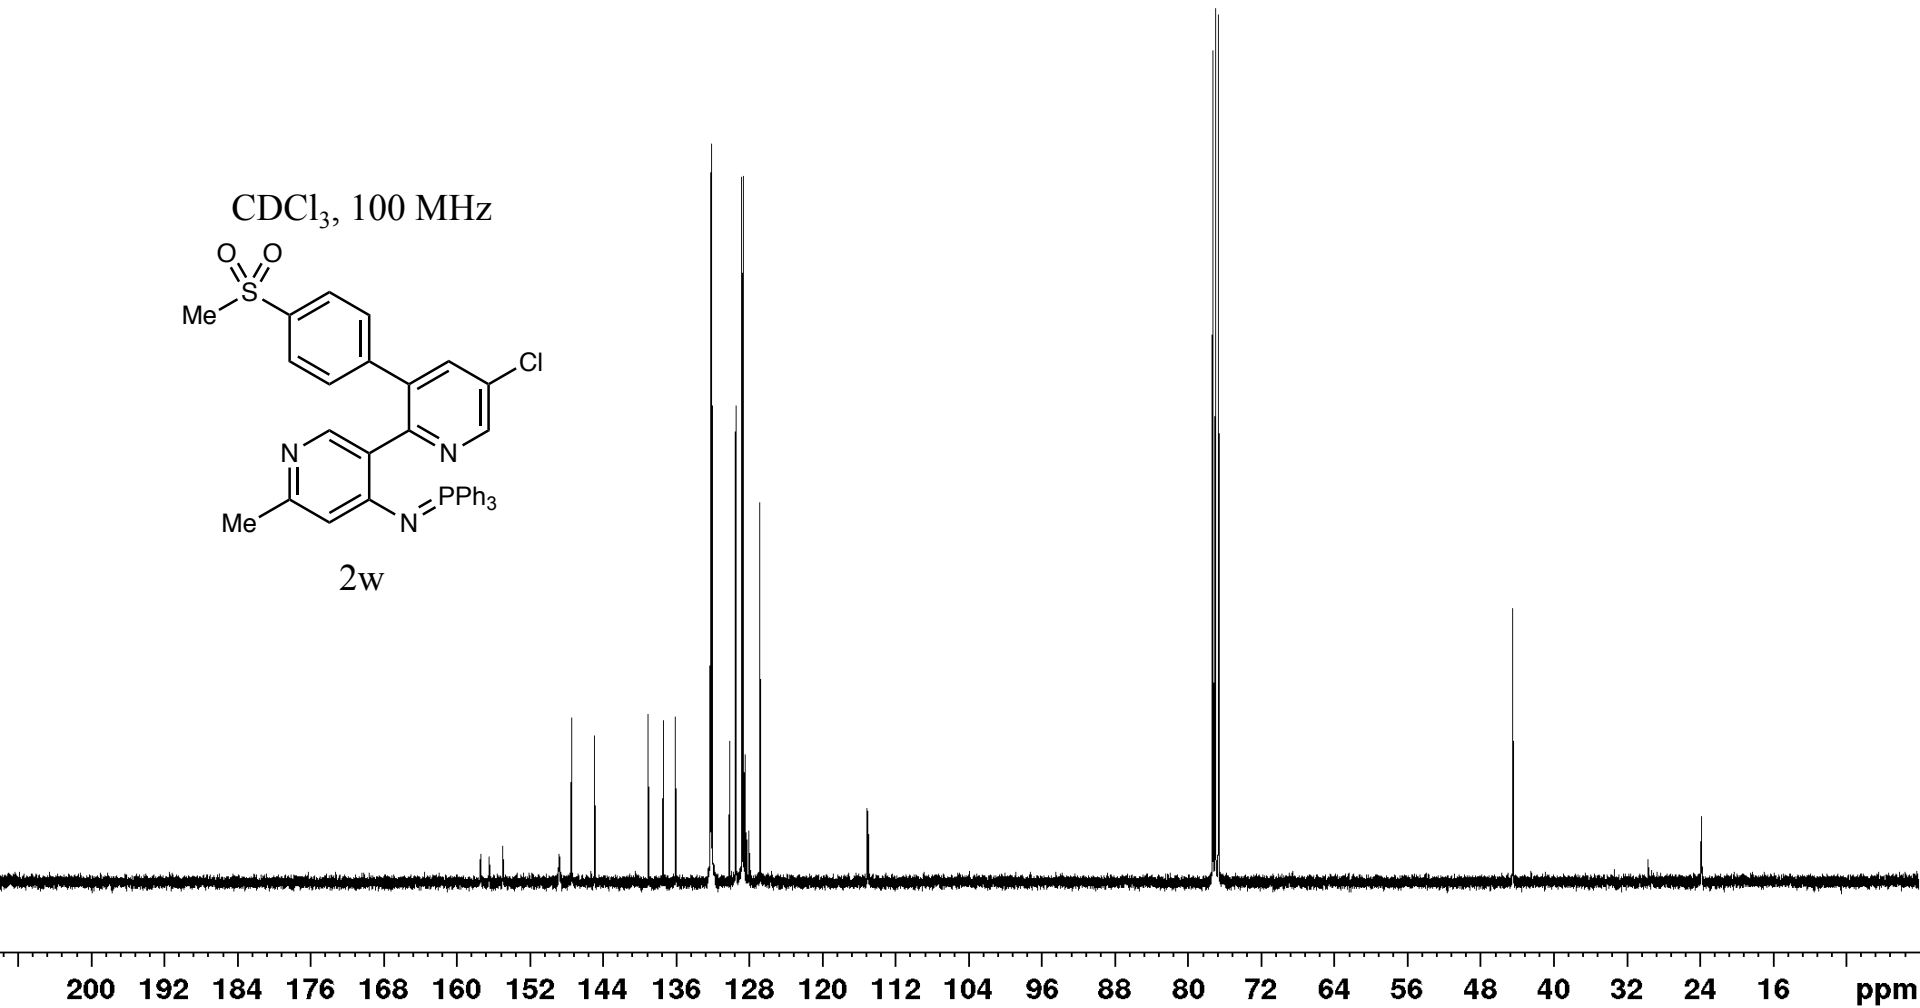

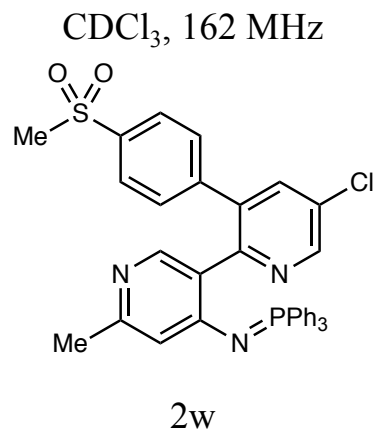

— 6.75

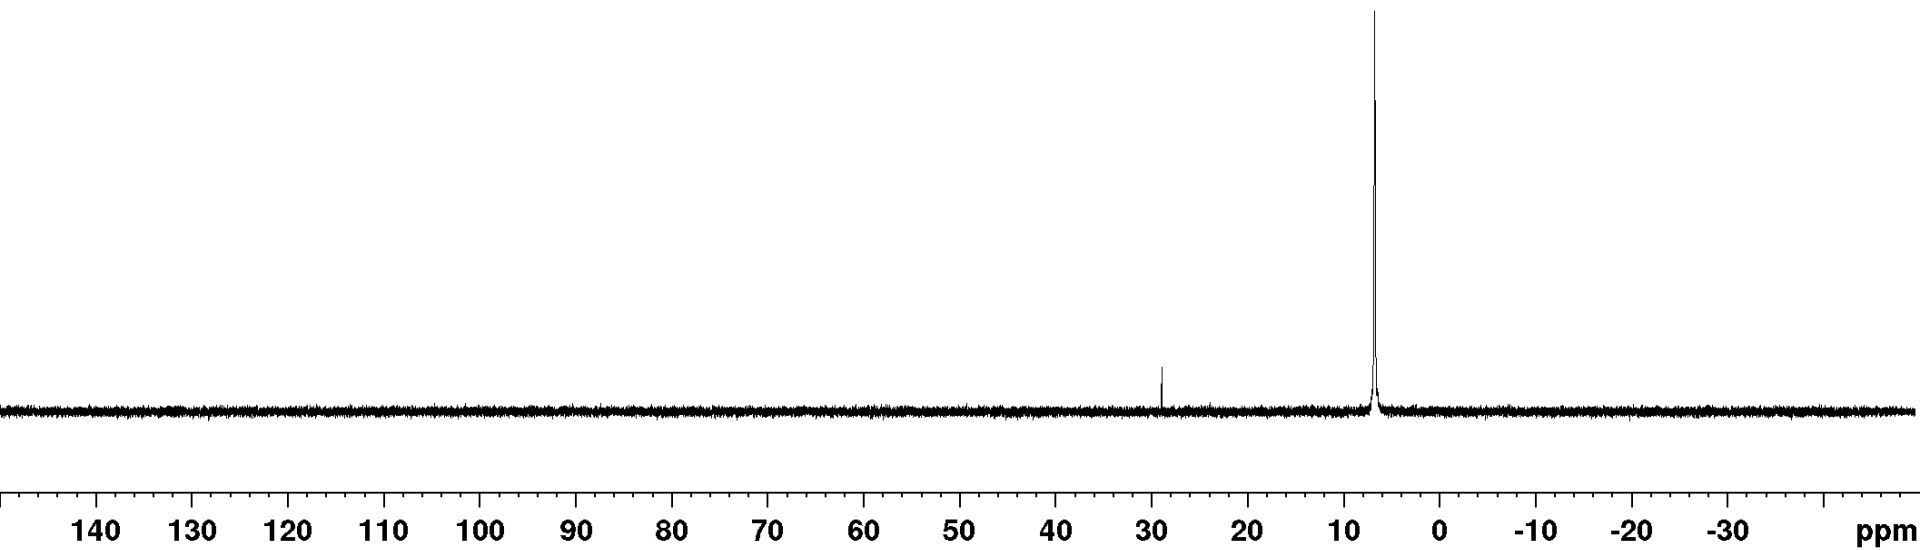

8.62  
8.30  
8.29  
7.86  
7.85  
7.83  
7.76  
7.76  
7.54  
7.54  
7.52  
7.52  
7.43  
7.41  
7.25  
7.23  
7.20  
7.18  
6.57  
6.55

3.55  
3.31  
3.30  
3.28  
3.28  
3.27  
3.27  
3.26  
2.49  
2.46  
2.23  
2.22

CD<sub>3</sub>OD, 400 MHz

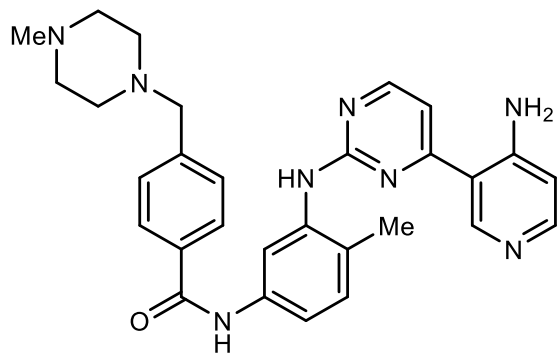

2x

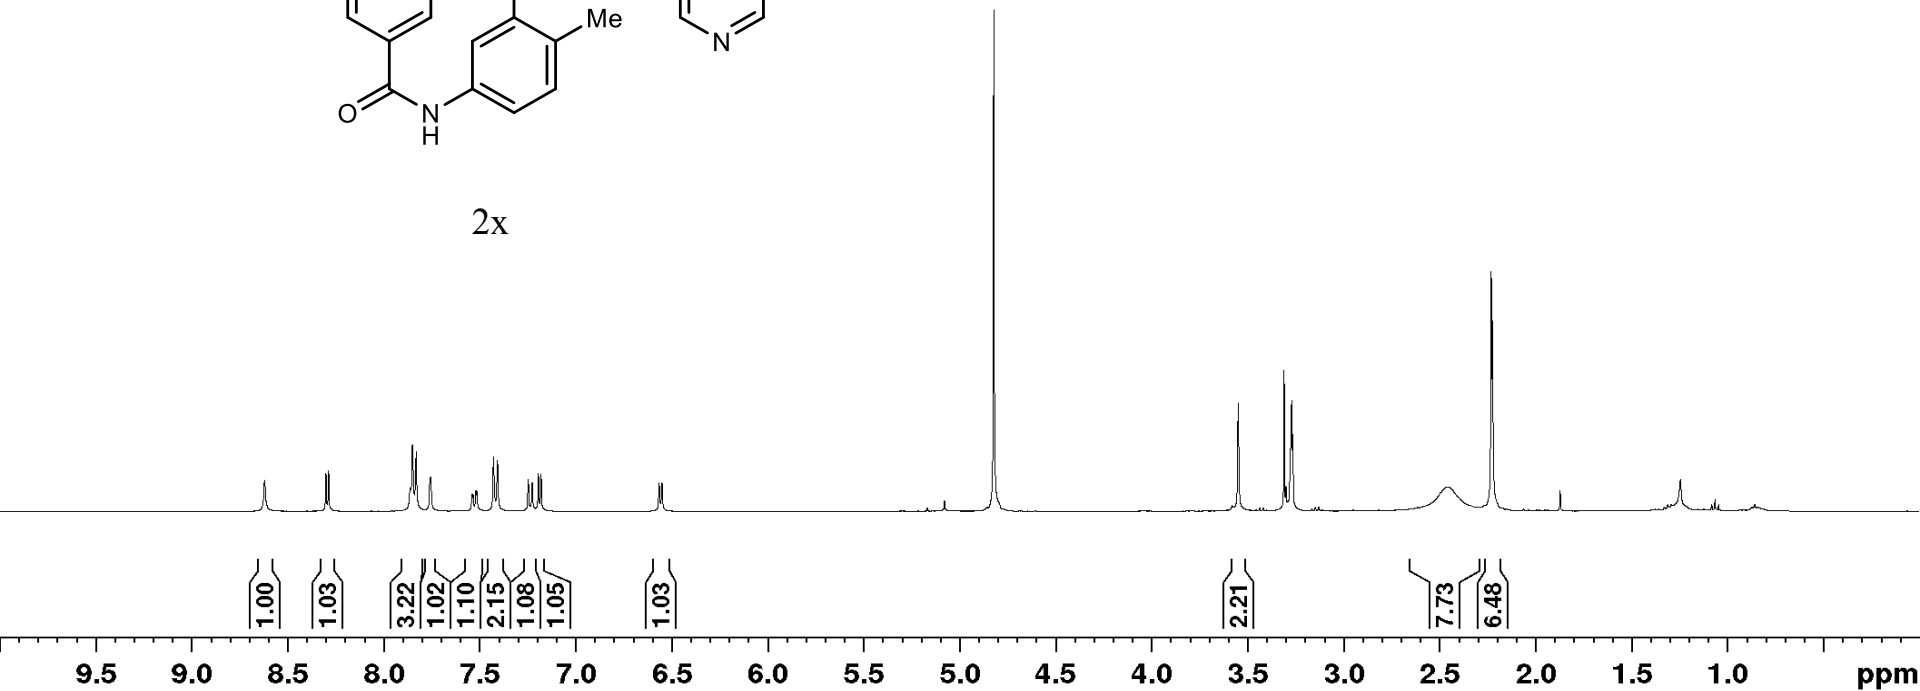



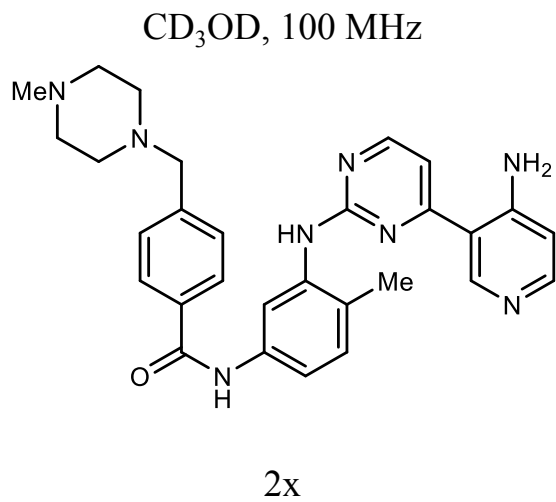

168.55  
166.56  
162.09  
159.23  
156.38  
150.48  
149.65  
142.96  
139.05  
138.48  
135.31  
131.88  
131.61  
130.55  
128.67  
120.32  
119.87  
114.44  
112.52  
107.48

63.27  
55.74  
53.59  
49.64  
49.42  
49.21  
49.00  
48.79  
48.57  
48.36  
45.98

— 17.84

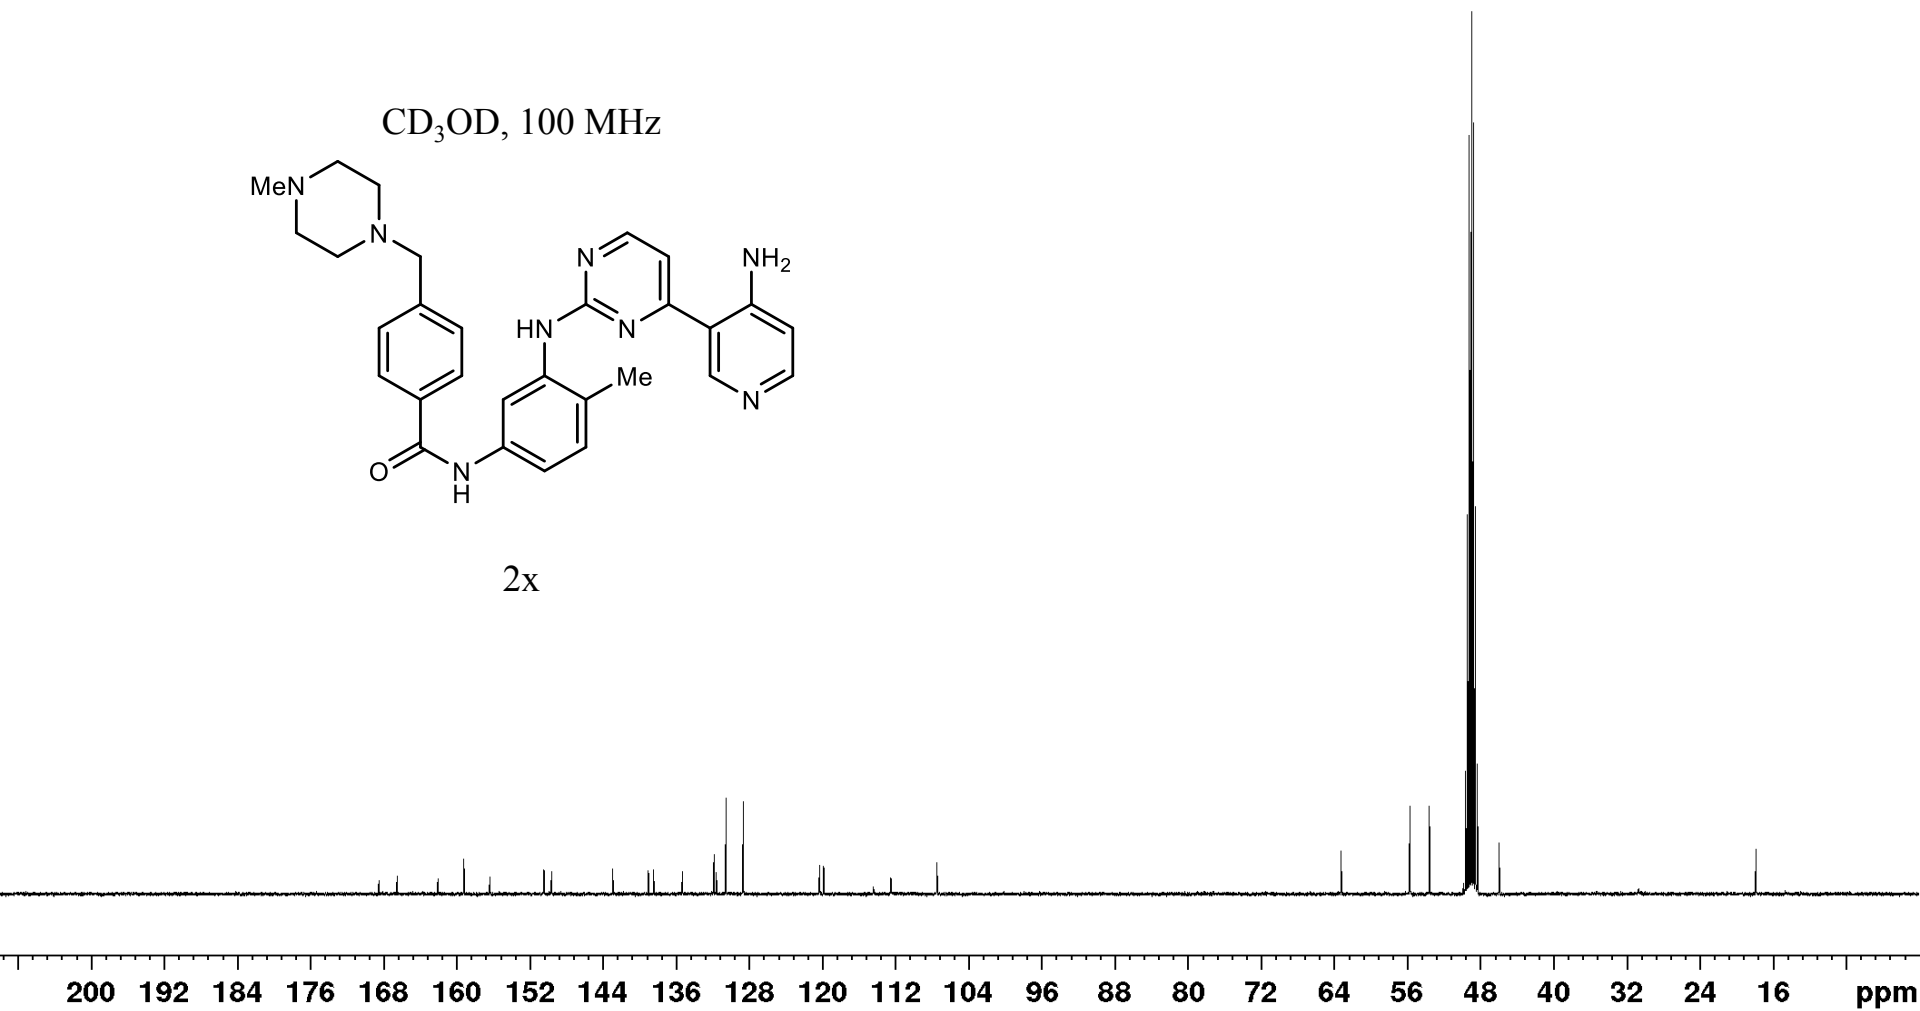

CDCl<sub>3</sub>, 400 MHz

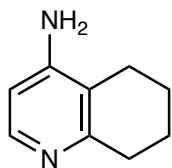

3aa

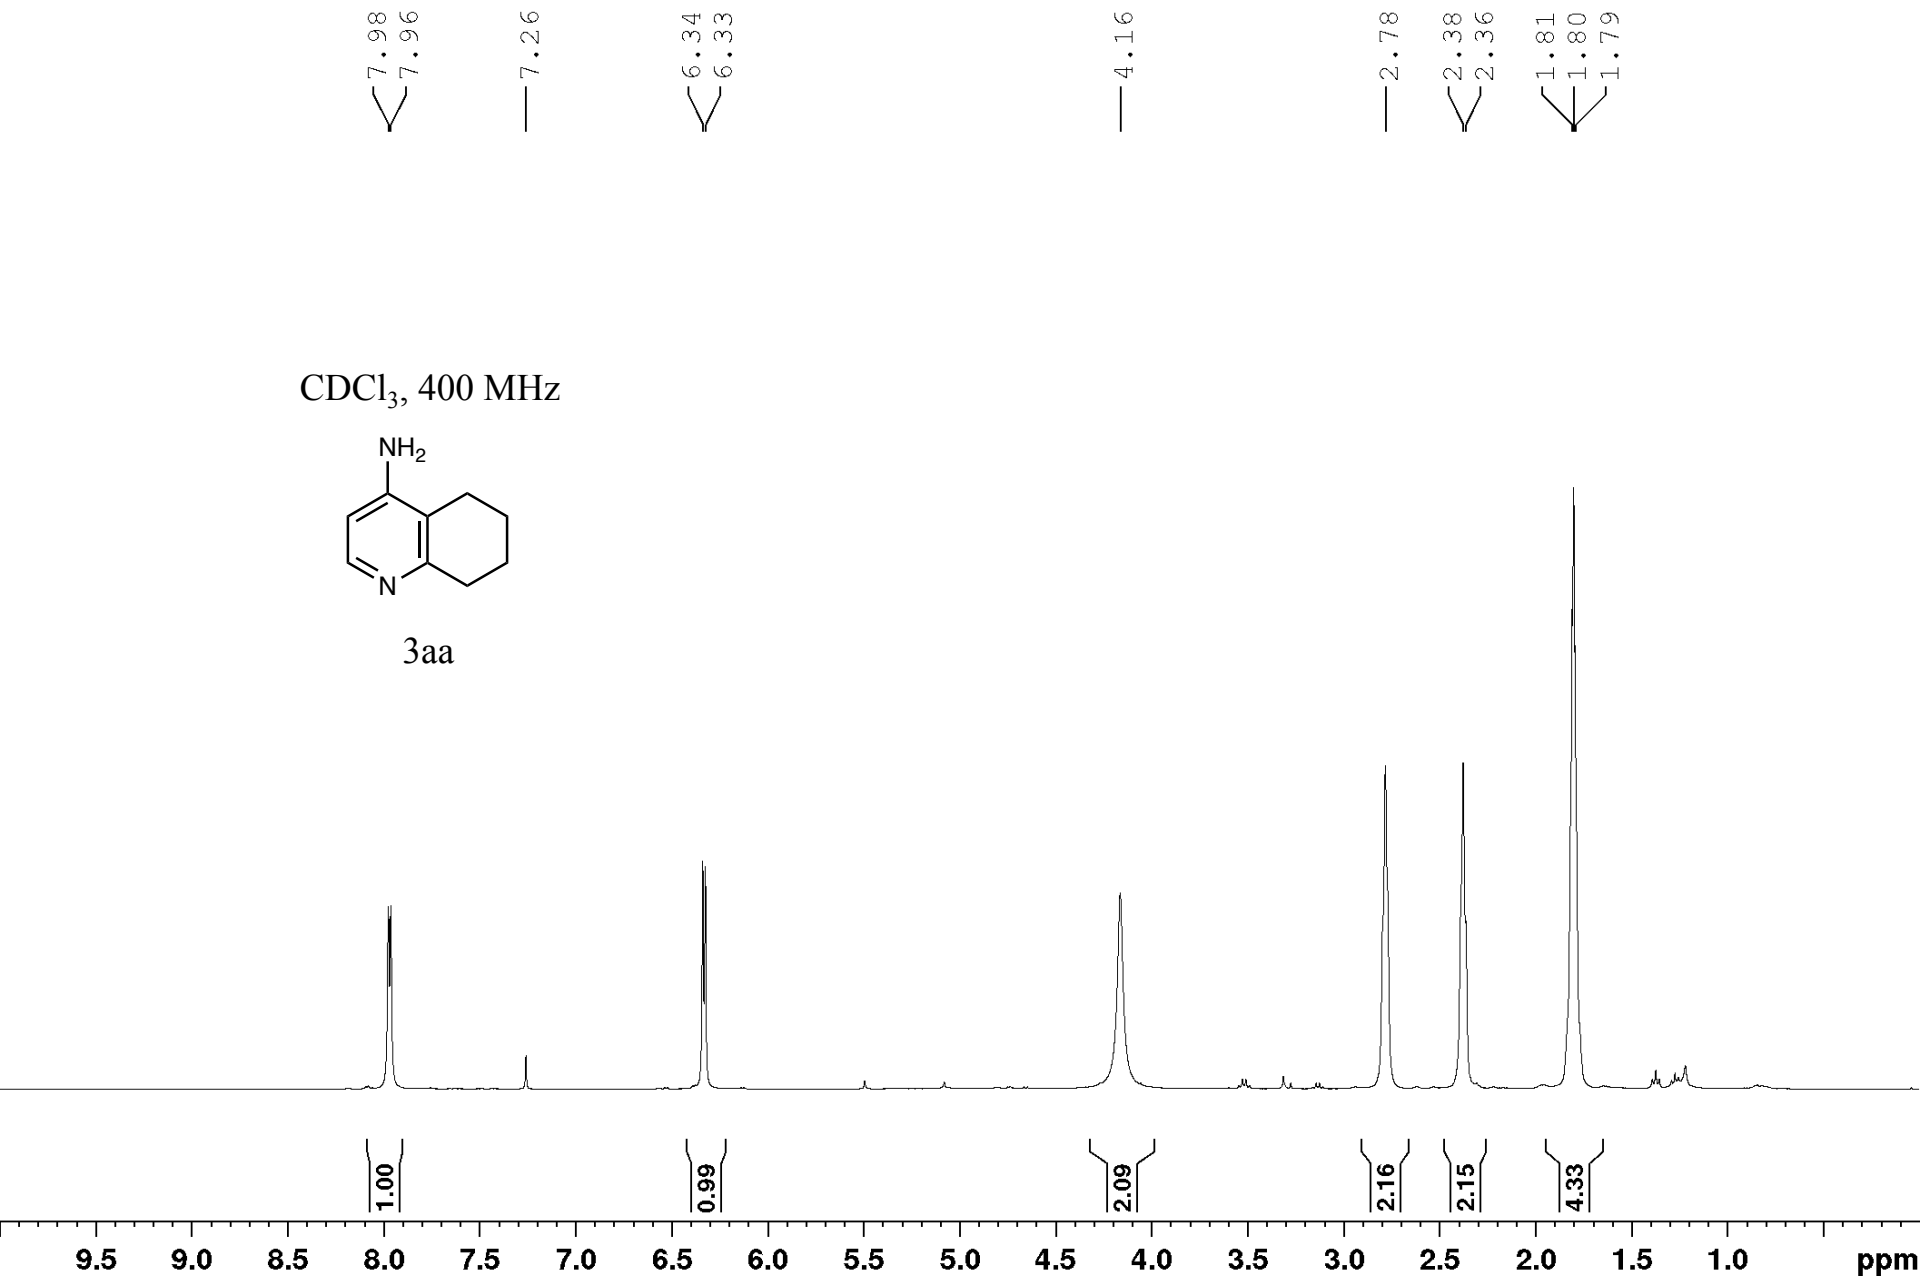

CDCl<sub>3</sub>, 100 MHz



3aa

— 156.86  
— 150.90  
— 146.59

— 115.71  
— 106.98

77.32  
77.00  
76.68

— 32.65  
22.79  
22.67  
22.39

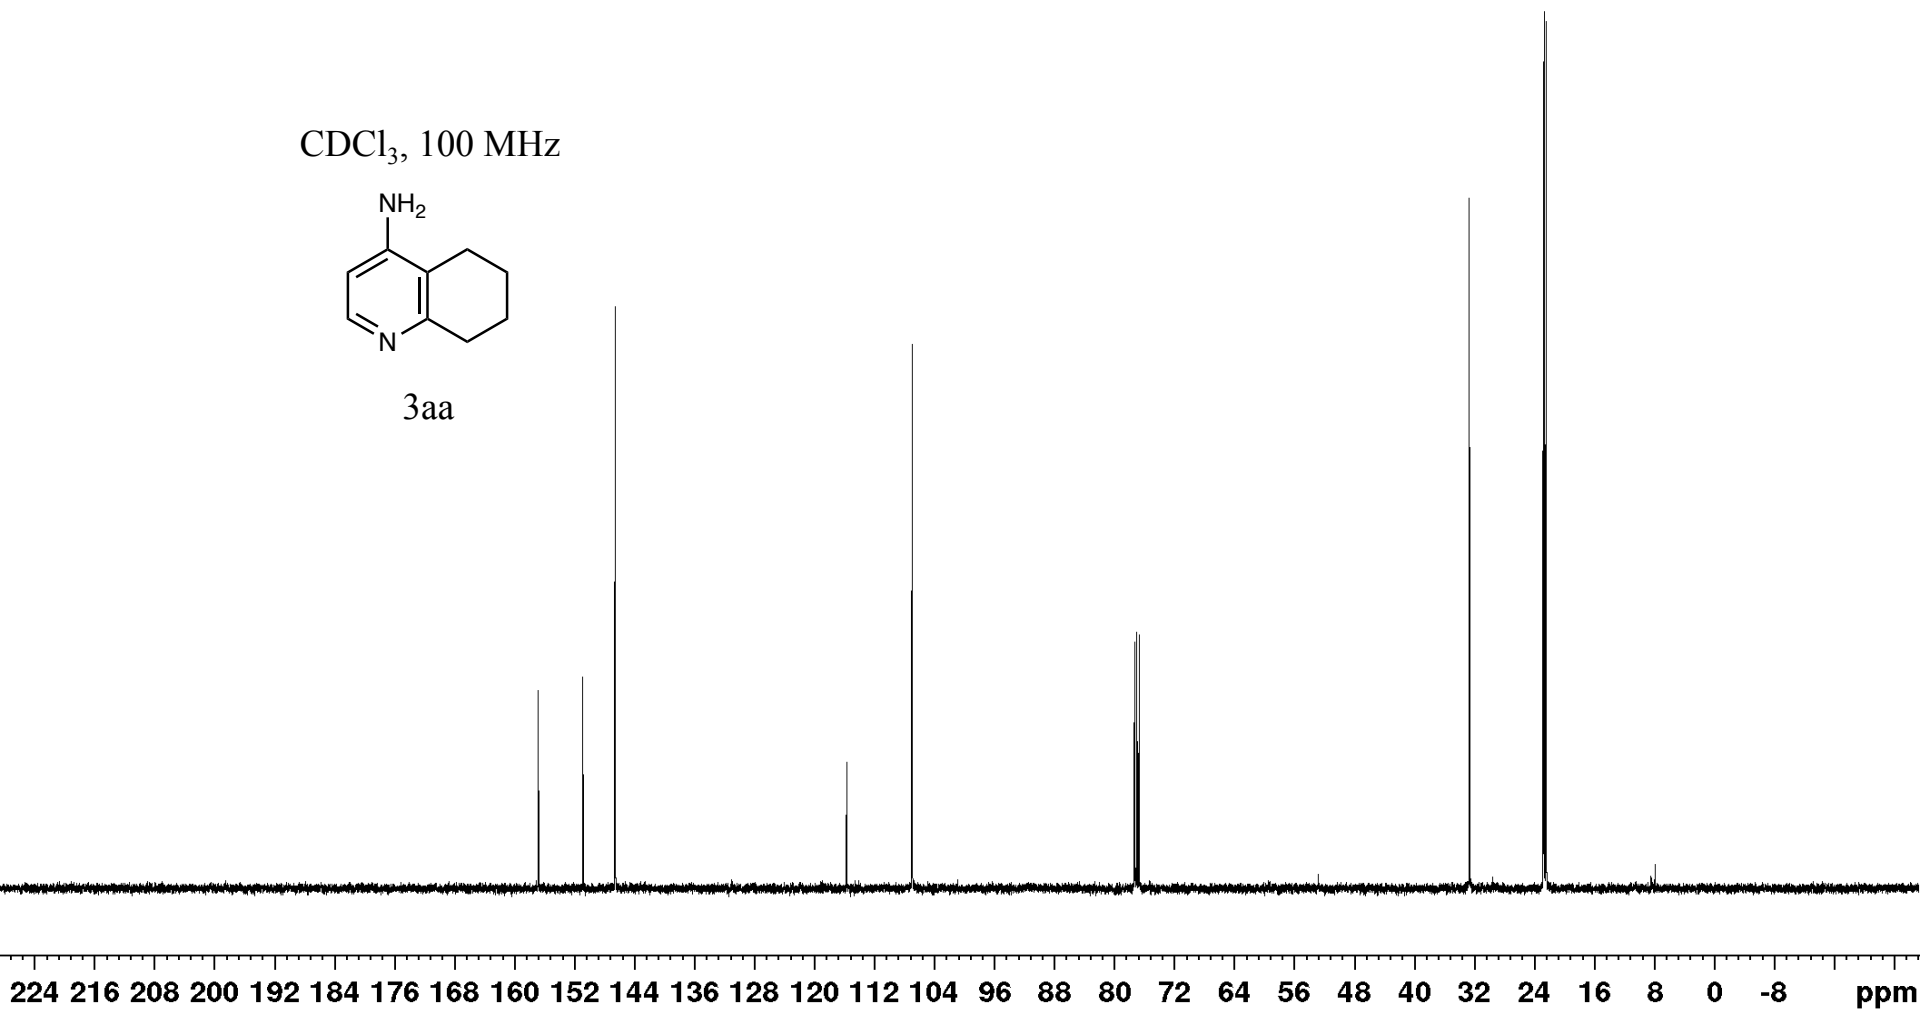

8.33  
8.32

7.26

6.91  
6.90

2.93  
2.91  
2.90  
2.81  
2.80  
2.78  
1.89  
1.87  
1.87  
1.86  
1.86  
1.85

CDCl<sub>3</sub>, 400 MHz

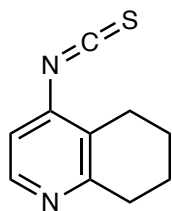

3ab

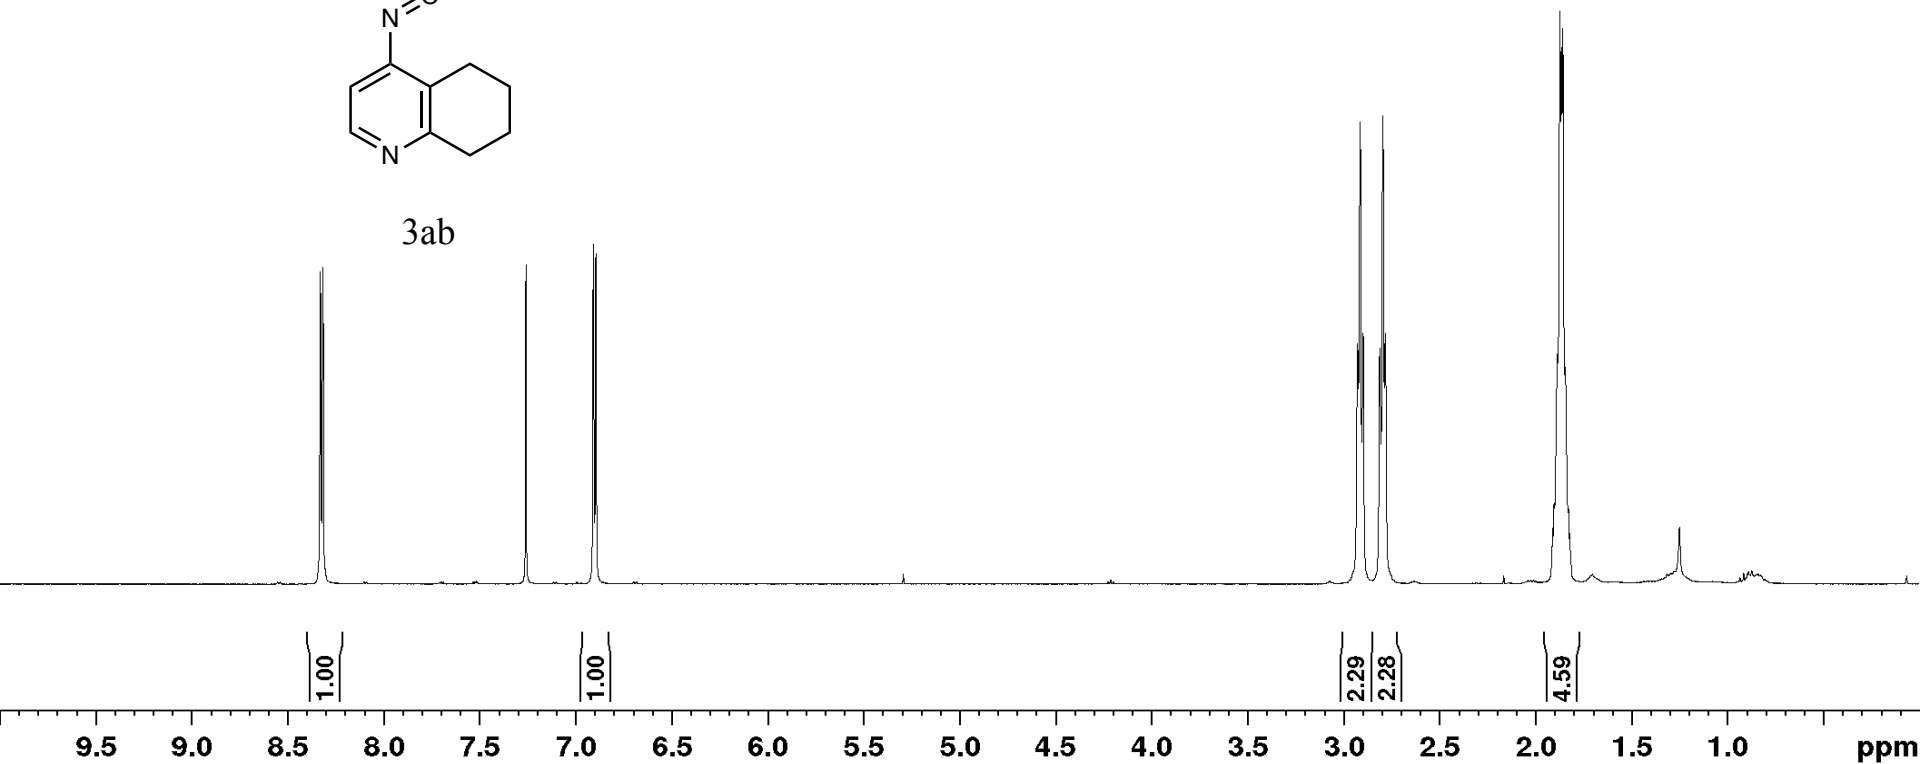

CDCl<sub>3</sub>, 100 MHz



3ab

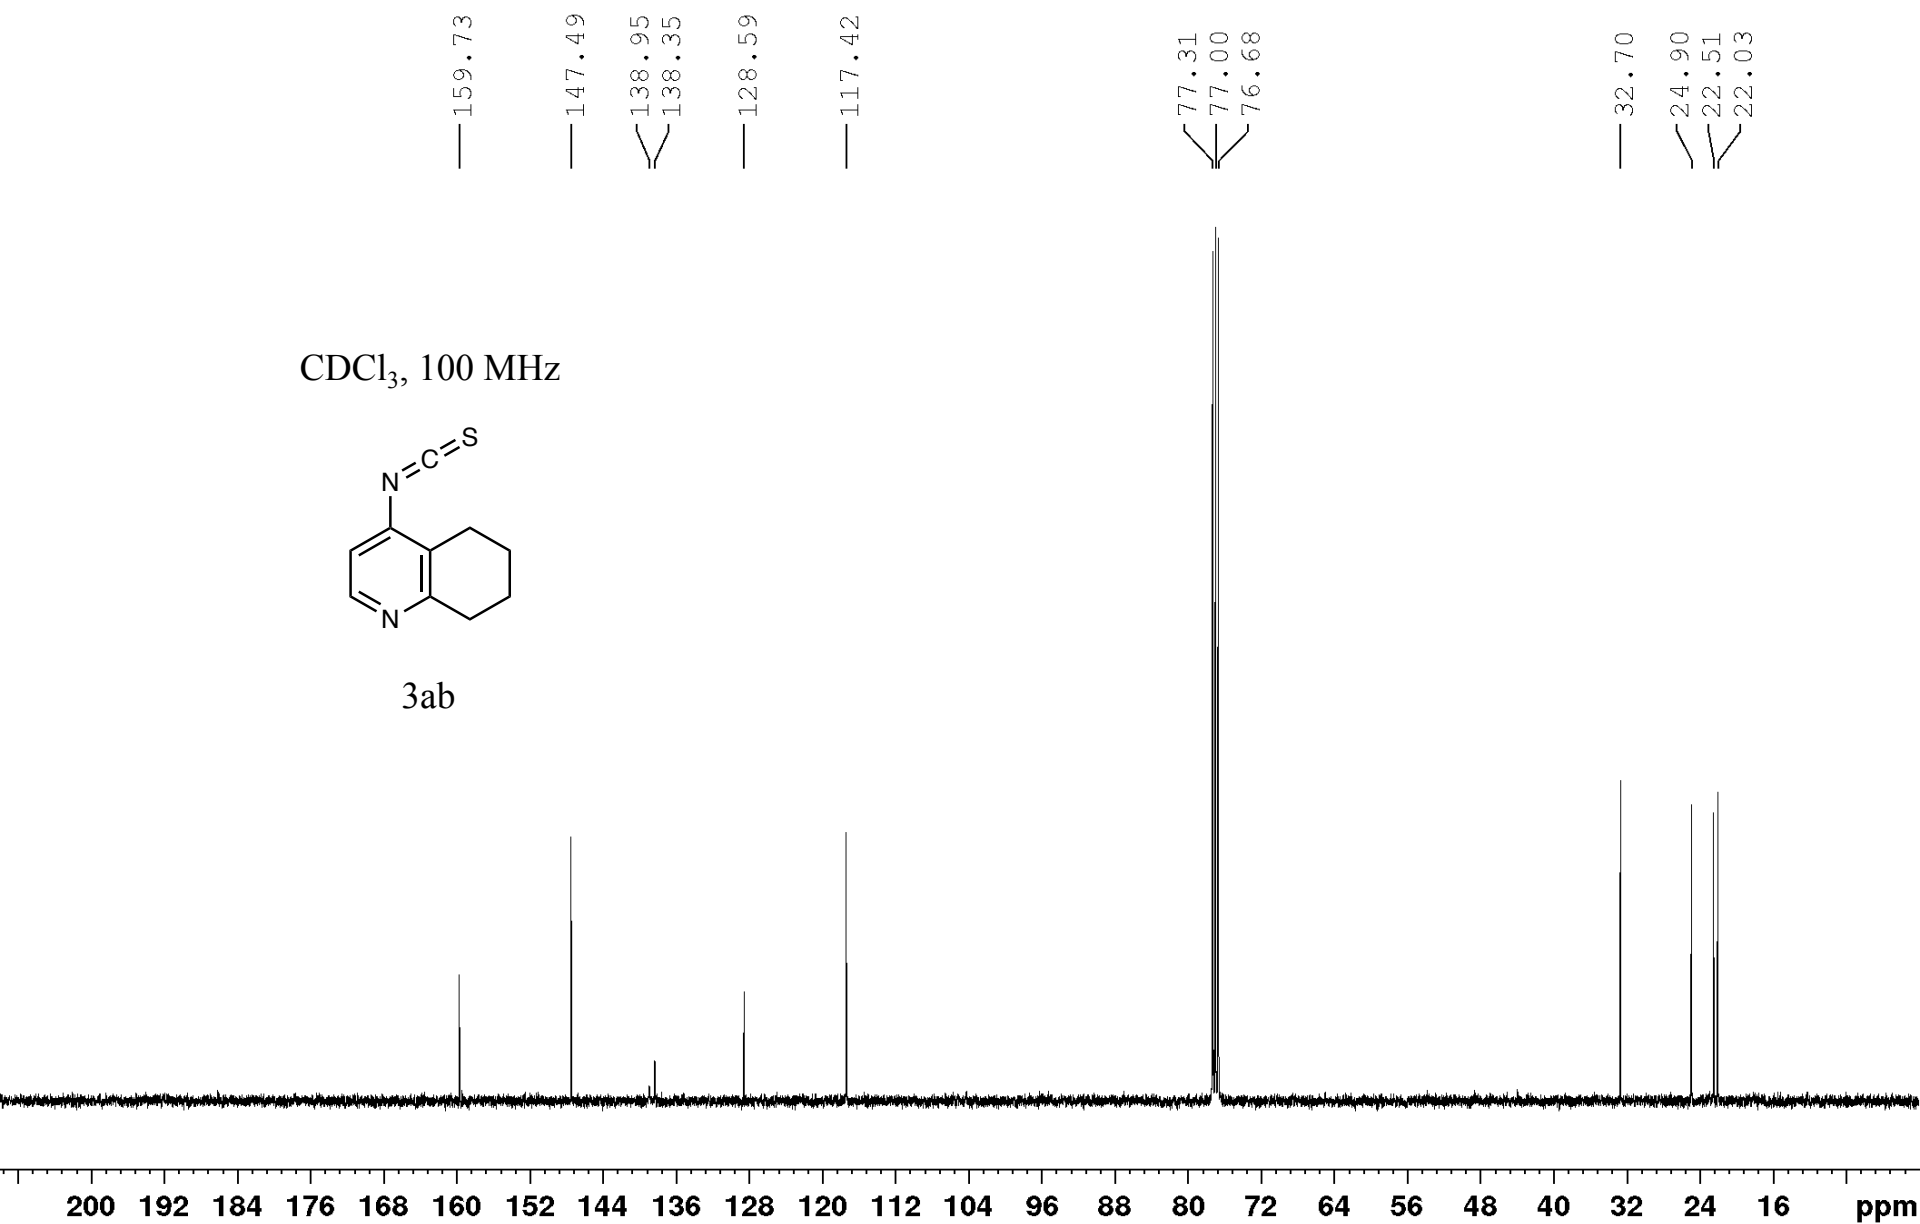

CD<sub>3</sub>OD, 400 MHz

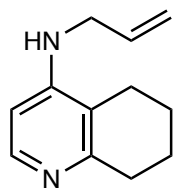

3ac

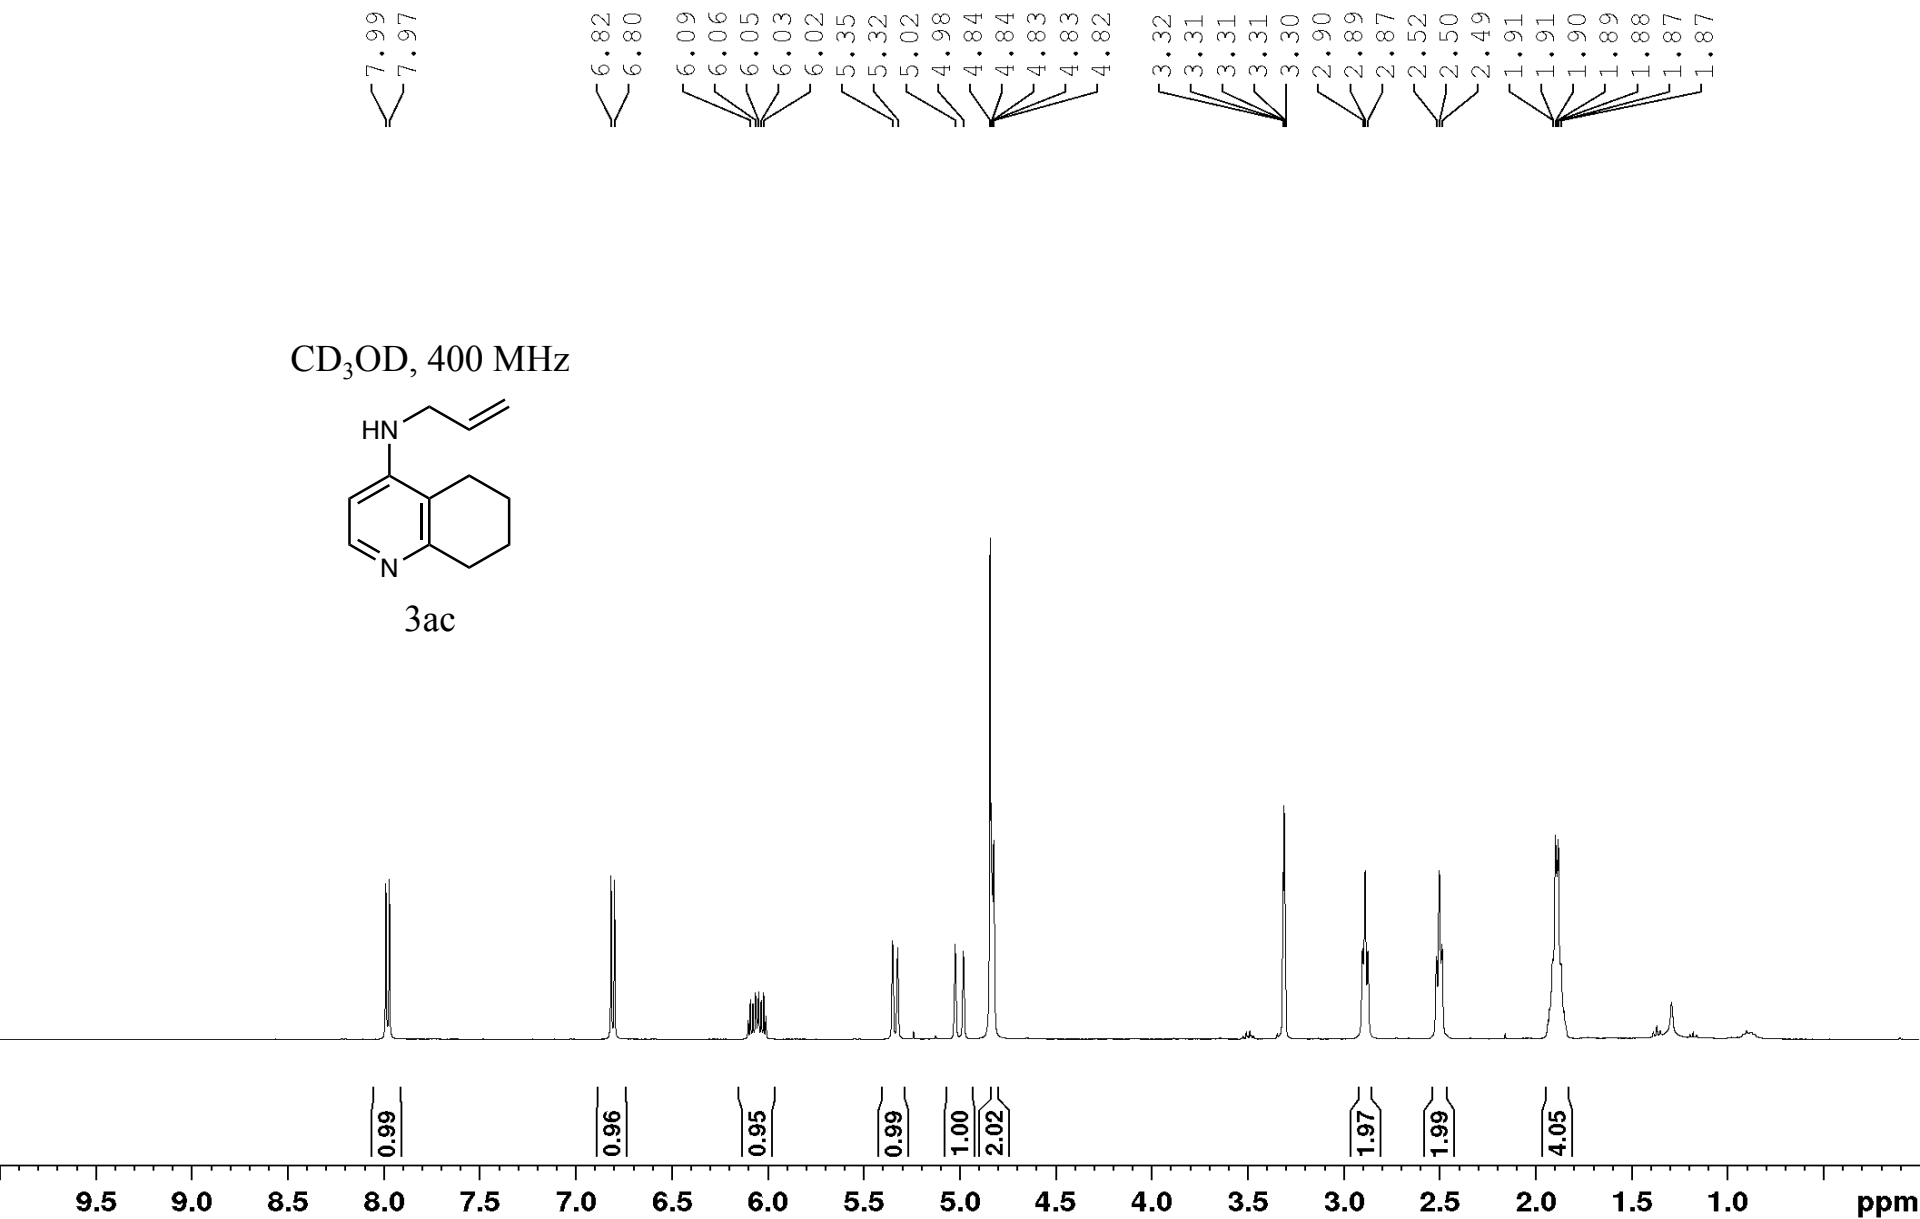

CD<sub>3</sub>OD, 100 MHz



3ac

— 159.22  
— 151.62  
— 143.15  
— 133.27  
— 119.47  
— 118.76  
— 108.64

57.06  
49.64  
49.42  
49.21  
49.00  
48.78  
48.57  
48.36

27.40  
24.27  
22.43  
21.70

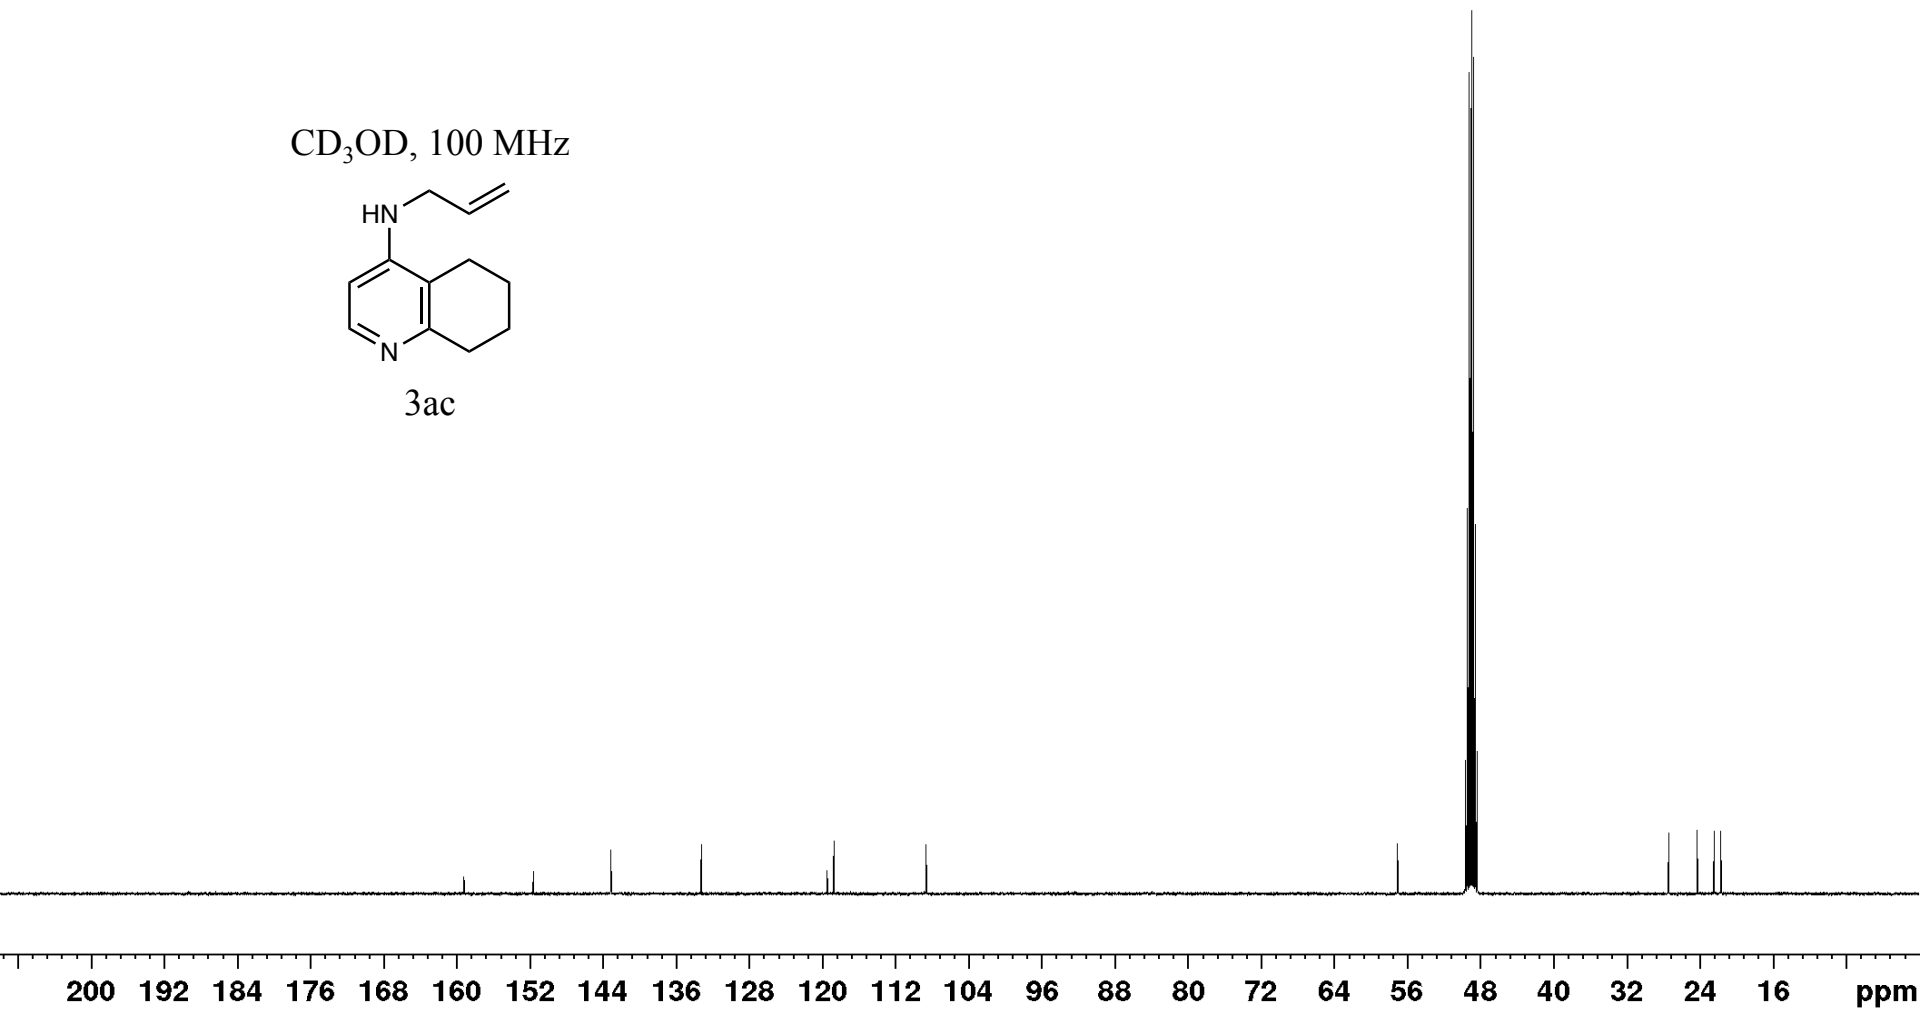

Supplement: NIHMS994686-supplement-SI_File.pdf [file NIHMS994686-supplement-SI_File.pdf]
